# Supplementary material for: FGFR Inhibition Overcomes Resistance to EGFR-targeted Therapy in Epithelial-like Cutaneous Carcinoma
Source: Oxford University Press journal article supplement (doi:10.1158/1078-0432.ccr-20-0232), 2020-12-01
Supplement: 10780432ccr200232-sup-235882_2_supp_6709038_qjj1rs.xlsx [file 10780432ccr200232-sup-235882_2_supp_6709038_qjj1rs.xlsx]

## Sheet: Index
Supplementary Table S1
In blue tab: Table describing main features of patient cSCCs and their respective SCC-PDXs
In the red tabs: differentially expressed genes in GefR or GefT SCC-PDXs vs their respective control SCC-PDXs.

## Sheet: patient and cSCC-PDX features
	HISTOPATHOL.	HIST.	GENDER	AGE	LOCATION OF PRIMARY	FIRST THERAPY	STATUS	PERINEURAL	ADJUVANT	RECURRENCE	METASTASIS
TUMOR	CLASSIFICATION	GRADE						INVASION	TREATMENT	(PATIENT)	LUNG	L NODES	LIVER/KIDNEY
cSCC10	MD/PD-SCC	G3	Male	75	trunck skin	Surgery	primary	no	no	no	no	no	no
SCC10-PDXs	MD/PD-SCC	G2/G3						no			0%	14.3%	0%
cSCC11	PD/S-SCC	G4	Female	77	Head skin	Surgery	primary	yes	no	no	no	no	no
SCC11-PDXs	PD/S-SCC	G4						yes			77.5%	32.7%	32.7%
cSCC16	PD-SCC	G3	Female	90	Head skin	Surgery	primary	yes	no	no	yes	yes	no
SCC16-PDXs	PD-SCC	G3						no			0	0	0
cSCC23 met	MD-SCC	G2	Male	68	Head skin	Surgery	metastasis	yes	no	yes	no	yes	no
SCC23-PDXs	MD/PD-SCC	G2/G3						no			25%	8.3%	0%
cSCC24	MD-SCC	G2	Male	82	Head skin	Surgery	primary	yes	RDT	no	no	no	no
SCC24-PDXs	MD-SCC	G2						no			0%	40%	0%
cSCC34	MD/PD-SCC	G3	Male	80	Head skin	Surgery	local relapse	yes	no	yes	no	no	no
SCC34-PDXs	MD-SCC	G2						no			38.9%	44.4%	8.3%
Met: metastasis
L nodes: lymph nodes
RDT: radiotherapy
STATUS: indentify if the cSCC sample used to generate the PDXs were primary or relapsed tumors

## Sheet: GefR vs Control SCC10-PDX UP
Supplementary Table S1: Genes with upregulated expression in GefR SCC10-PDX vs Control SCC10-PDX (padj<0.05; FC>2)
ID	Gene Symbol	log2 Fold Change vs Control GefR SCC10-PDX	pvalue GefR vs Control SCC10-PDX	padj GefR vs Control SCC10-PDX	chromosome name	start position	end position	description
ENSG00000269825	CTD-3099C6.9	10.5291	1.61671e-11	3.42482e-09	19	52650437	52653284
ENSG00000148798	INA	10.1584	1.4645e-12	3.65217e-10	10	103277163	103290351	internexin neuronal intermediate filament protein alpha [Source:HGNC Symbol;Acc:HGNC:6057]
ENSG00000259672	RP11-69G7.1	8.99054	1.27187e-07	1.1287e-05	15	63098870	63110403
ENSG00000169297	NR0B1	8.93757	2.3805e-05	0.00103987	X	30304206	30309598	nuclear receptor subfamily 0 group B member 1 [Source:HGNC Symbol;Acc:HGNC:7960]
ENSG00000172716	SLFN11	8.61472	1.60572e-12	3.95428e-10	17	35350305	35373701	schlafen family member 11 [Source:HGNC Symbol;Acc:HGNC:26633]
ENSG00000224594	RPL29P19	8.51514	2.74835e-08	2.88007e-06	8	48384590	48385049	ribosomal protein L29 pseudogene 19 [Source:HGNC Symbol;Acc:HGNC:35508]
ENSG00000090376	IRAK3	7.54132	5.13621e-21	5.05943e-18	12	66188879	66254622	interleukin 1 receptor associated kinase 3 [Source:HGNC Symbol;Acc:HGNC:17020]
ENSG00000101194	SLC17A9	7.44151	5.64317e-06	0.000307228	20	62952647	62969585	solute carrier family 17 member 9 [Source:HGNC Symbol;Acc:HGNC:16192]
ENSG00000255026	RP11-326C3.2	6.8614	0.00017353	0.00530856	11	287305	288987
ENSG00000089558	KCNH4	6.63473	2.84892e-05	0.00118161	17	42156891	42181278	potassium voltage-gated channel subfamily H member 4 [Source:HGNC Symbol;Acc:HGNC:6253]
ENSG00000170430	MGMT	6.60922	1.71414e-33	5.62838e-30	10	129467184	129768007	O-6-methylguanine-DNA methyltransferase [Source:HGNC Symbol;Acc:HGNC:7059]
ENSG00000198885	ITPRIPL1	6.53263	1.40507e-05	0.000681805	2	96325331	96330517	inositol 1,4,5-trisphosphate receptor interacting protein-like 1 [Source:HGNC Symbol;Acc:HGNC:29371]
ENSG00000150394	CDH8	6.49527	0.000484998	0.0114294	16	61647242	62037035	cadherin 8 [Source:HGNC Symbol;Acc:HGNC:1767]
ENSG00000177335	C8orf31	6.40773	0.00104393	0.020546	8	143039209	143059942	chromosome 8 open reading frame 31 [Source:HGNC Symbol;Acc:HGNC:26731]
ENSG00000214617	SLC6A10P	6.25573	1.19372e-10	2.15757e-08	16	32877469	32885501	solute carrier family 6 member 10, pseudogene [Source:HGNC Symbol;Acc:HGNC:11043]
ENSG00000136542	GALNT5	6.21965	9.15942e-05	0.00317693	2	157257598	157314211	polypeptide N-acetylgalactosaminyltransferase 5 [Source:HGNC Symbol;Acc:HGNC:4127]
ENSG00000242779	ZNF702P	6.21377	0.0018569	0.0309049	19	52968251	53037898	zinc finger protein 702, pseudogene [Source:HGNC Symbol;Acc:HGNC:25775]
ENSG00000247844	CCAT1	6.05667	2.28964e-05	0.00100913	8	127207866	127219088	colon cancer associated transcript 1 (non-protein coding) [Source:HGNC Symbol;Acc:HGNC:45128]
ENSG00000182621	PLCB1	5.88417	3.44281e-14	1.18994e-11	20	8077251	8968360	phospholipase C beta 1 [Source:HGNC Symbol;Acc:HGNC:15917]
ENSG00000088881	EBF4	5.88187	6.53709e-10	1.01407e-07	20	2692878	2760108	early B-cell factor 4 [Source:HGNC Symbol;Acc:HGNC:29278]
ENSG00000008056	SYN1	5.72308	4.66136e-09	5.92473e-07	X	47571898	47619943	synapsin I [Source:HGNC Symbol;Acc:HGNC:11494]
ENSG00000138131	LOXL4	5.5932	2.69846e-11	5.42472e-09	10	98247690	98268250	lysyl oxidase like 4 [Source:HGNC Symbol;Acc:HGNC:17171]
ENSG00000110675	ELMOD1	5.49321	8.5378e-08	7.97172e-06	11	107591091	107666779	ELMO domain containing 1 [Source:HGNC Symbol;Acc:HGNC:25334]
ENSG00000169515	CCDC8	5.49219	0.000410984	0.0102362	19	46410372	46413584	coiled-coil domain containing 8 [Source:HGNC Symbol;Acc:HGNC:25367]
ENSG00000183979	NPB	5.41493	0.000135774	0.00434939	17	81900745	81902905	neuropeptide B [Source:HGNC Symbol;Acc:HGNC:30099]
ENSG00000169855	ROBO1	5.41281	5.58251e-08	5.5546e-06	3	78597240	79767815	roundabout guidance receptor 1 [Source:HGNC Symbol;Acc:HGNC:10249]
ENSG00000187824	TMEM220	5.298	0.000671782	0.0146727	17	10699015	10730316	transmembrane protein 220 [Source:HGNC Symbol;Acc:HGNC:33757]
ENSG00000166105	GLB1L3	5.24266	1.97067e-06	0.000123644	11	134274245	134319564	galactosidase beta 1 like 3 [Source:HGNC Symbol;Acc:HGNC:25147]
ENSG00000115468	EFHD1	5.21579	1.86627e-13	5.48768e-11	2	232606057	232682781	EF-hand domain family member D1 [Source:HGNC Symbol;Acc:HGNC:29556]
ENSG00000004468	CD38	5.16372	4.59584e-15	1.81085e-12	4	15778275	15853230	CD38 molecule [Source:HGNC Symbol;Acc:HGNC:1667]
ENSG00000116819	TFAP2E	5.13905	8.70584e-15	3.36301e-12	1	35573370	35595328	transcription factor AP-2 epsilon [Source:HGNC Symbol;Acc:HGNC:30774]
ENSG00000250742	RP11-834C11.4	5.12241	5.42067e-12	1.24177e-09	12	54126098	54142493
ENSG00000010438	PRSS3	5.10575	3.60852e-18	2.22161e-15	9	33750466	33799231	protease, serine 3 [Source:HGNC Symbol;Acc:HGNC:9486]
ENSG00000270977	AC015849.16	4.99571	0.00287897	0.0420761	17	35893707	35911023
ENSG00000133687	TMTC1	4.87786	4.24306e-11	8.35925e-09	12	29500840	29784759	transmembrane and tetratricopeptide repeat containing 1 [Source:HGNC Symbol;Acc:HGNC:24099]
ENSG00000008323	PLEKHG6	4.8595	1.05457e-11	2.28308e-09	12	6310436	6328506	pleckstrin homology and RhoGEF domain containing G6 [Source:HGNC Symbol;Acc:HGNC:25562]
ENSG00000227066	RP3-340N1.2	4.84718	0.000634426	0.0140752	1	20154338	20160568
ENSG00000170477	KRT4	4.82266	0.00030078	0.00808413	12	52806549	52814551	keratin 4 [Source:HGNC Symbol;Acc:HGNC:6441]
ENSG00000112499	SLC22A2	4.8222	0.000667448	0.0145942	6	160171061	160277638	solute carrier family 22 member 2 [Source:HGNC Symbol;Acc:HGNC:10966]
ENSG00000277200	RP11-74E22.8	4.81828	0.000718163	0.0153788	17	2720801	2723947
ENSG00000131634	TMEM204	4.81714	2.06496e-05	0.000935215	16	1528688	1555580	transmembrane protein 204 [Source:HGNC Symbol;Acc:HGNC:14158]
ENSG00000123689	G0S2	4.79078	5.67475e-14	1.89489e-11	1	209675420	209676388	G0/G1 switch 2 [Source:HGNC Symbol;Acc:HGNC:30229]
ENSG00000164659	KIAA1324L	4.76857	0.00045893	0.0109963	7	86876906	87059699	KIAA1324 like [Source:HGNC Symbol;Acc:HGNC:21945]
ENSG00000187688	TRPV2	4.76084	7.72509e-07	5.43543e-05	17	16415542	16437003	transient receptor potential cation channel subfamily V member 2 [Source:HGNC Symbol;Acc:HGNC:18082]
ENSG00000253891	RP11-203E8.1	4.72493	0.00264213	0.0395536	8	24169957	24177080
ENSG00000231826	LINC01819	4.69081	5.03439e-05	0.00192481	2	43027853	43039547	long intergenic non-protein coding RNA 1819 [Source:HGNC Symbol;Acc:HGNC:52624]
ENSG00000246100	LINC00900	4.68508	0.000105198	0.00354274	11	115754248	115760627	long intergenic non-protein coding RNA 900 [Source:HGNC Symbol;Acc:HGNC:27444]
ENSG00000181085	MAPK15	4.67551	1.72036e-12	4.13328e-10	8	143716259	143722458	mitogen-activated protein kinase 15 [Source:HGNC Symbol;Acc:HGNC:24667]
ENSG00000188883	KLRG2	4.65029	0.000498613	0.0116388	7	139452690	139483712	killer cell lectin like receptor G2 [Source:HGNC Symbol;Acc:HGNC:24778]
ENSG00000238117	AP004372.1	4.60898	0.000380014	0.00956149	11	131877680	131897108
ENSG00000089486	CDIP1	4.56789	1.09988e-14	4.16706e-12	16	4510675	4538828	cell death inducing p53 target 1 [Source:HGNC Symbol;Acc:HGNC:13234]
ENSG00000198680	TUSC1	4.55021	1.28312e-31	3.61125e-28	9	25676389	25678440	tumor suppressor candidate 1 [Source:HGNC Symbol;Acc:HGNC:31010]
ENSG00000197921	HES5	4.52357	0.000130792	0.00422416	1	2528745	2530245	hes family bHLH transcription factor 5 [Source:HGNC Symbol;Acc:HGNC:19764]
ENSG00000182667	NTM	4.51488	1.32113e-70	2.60276e-66	11	131370478	132336822	neurotrimin [Source:HGNC Symbol;Acc:HGNC:17941]
ENSG00000138798	EGF	4.50147	0.000522233	0.0120474	4	109912884	110012266	epidermal growth factor [Source:HGNC Symbol;Acc:HGNC:3229]
ENSG00000167100	SAMD14	4.49743	1.98338e-05	0.000906601	17	50110040	50129882	sterile alpha motif domain containing 14 [Source:HGNC Symbol;Acc:HGNC:27312]
ENSG00000187513	GJA4	4.49332	0.00311822	0.0446129	1	34792998	34795747	gap junction protein alpha 4 [Source:HGNC Symbol;Acc:HGNC:4278]
ENSG00000230526	RP11-472G21.2	4.48954	0.000931463	0.0187253	10	71878356	71879107
ENSG00000204219	TCEA3	4.4873	5.09211e-16	2.22933e-13	1	23381061	23424740	transcription elongation factor A3 [Source:HGNC Symbol;Acc:HGNC:11615]
ENSG00000148803	FUOM	4.48371	3.09979e-10	5.21957e-08	10	133355154	133358035	fucose mutarotase [Source:HGNC Symbol;Acc:HGNC:24733]
ENSG00000165972	CCDC38	4.42891	0.000170571	0.00524245	12	95867048	95942974	coiled-coil domain containing 38 [Source:HGNC Symbol;Acc:HGNC:26843]
ENSG00000260549	MT1L	4.41124	6.99619e-18	3.93806e-15	16	56617476	56618818	metallothionein 1L, pseudogene [Source:HGNC Symbol;Acc:HGNC:7404]
ENSG00000196188	CTSE	4.39993	0.000879618	0.0179649	1	206009264	206023909	cathepsin E [Source:HGNC Symbol;Acc:HGNC:2530]
ENSG00000170542	SERPINB9	4.37958	0.00121627	0.0228861	6	2887266	2903280	serpin family B member 9 [Source:HGNC Symbol;Acc:HGNC:8955]
ENSG00000231131	LINC01468	4.37358	3.74071e-05	0.00150093	10	52450874	52470533	long intergenic non-protein coding RNA 1468 [Source:HGNC Symbol;Acc:HGNC:50913]
ENSG00000175040	CHST2	4.32161	9.55008e-19	6.71951e-16	3	143119331	143124014	carbohydrate sulfotransferase 2 [Source:HGNC Symbol;Acc:HGNC:1970]
ENSG00000101680	LAMA1	4.32088	1.40753e-14	5.13515e-12	18	6941744	7117814	laminin subunit alpha 1 [Source:HGNC Symbol;Acc:HGNC:6481]
ENSG00000172322	CLEC12A	4.28849	0.00305891	0.043932	12	9951316	9995694	C-type lectin domain family 12 member A [Source:HGNC Symbol;Acc:HGNC:31713]
ENSG00000277496	RP11-93B14.9	4.28408	0.000245178	0.00694999	20	62648961	62650767
ENSG00000164778	EN2	4.08714	0.00221865	0.0347454	7	155458129	155464831	engrailed homeobox 2 [Source:HGNC Symbol;Acc:HGNC:3343]
ENSG00000148053	NTRK2	4.06995	5.04138e-05	0.00192481	9	84668551	85027070	neurotrophic receptor tyrosine kinase 2 [Source:HGNC Symbol;Acc:HGNC:8032]
ENSG00000118785	SPP1	4.05217	0.0033983	0.0472476	4	87975650	87983426	secreted phosphoprotein 1 [Source:HGNC Symbol;Acc:HGNC:11255]
ENSG00000171357	LURAP1	4.01863	2.67793e-05	0.0011249	1	46203334	46221261	leucine rich adaptor protein 1 [Source:HGNC Symbol;Acc:HGNC:32327]
ENSG00000111275	ALDH2	3.98235	1.73536e-28	3.10803e-25	12	111766887	111817529	aldehyde dehydrogenase 2 family (mitochondrial) [Source:HGNC Symbol;Acc:HGNC:404]
ENSG00000265666	RARA-AS1	3.96417	2.30356e-06	0.000143162	17	40340867	40343136	RARA antisense RNA 1 [Source:HGNC Symbol;Acc:HGNC:49577]
ENSG00000227372	TP73-AS1	3.90787	7.79895e-07	5.46638e-05	1	3735601	3747336	TP73 antisense RNA 1 [Source:HGNC Symbol;Acc:HGNC:29052]
ENSG00000283973	RP5-848E13.4	3.89756	3.80958e-06	0.000219452	1	42959065	42961864
ENSG00000149090	PAMR1	3.86664	7.93825e-07	5.5262e-05	11	35431823	35530300	peptidase domain containing associated with muscle regeneration 1 [Source:HGNC Symbol;Acc:HGNC:24554]
ENSG00000073067	CYP2W1	3.84375	0.00017116	0.00525238	7	983199	989640	cytochrome P450 family 2 subfamily W member 1 [Source:HGNC Symbol;Acc:HGNC:20243]
ENSG00000111846	GCNT2	3.83012	2.62105e-06	0.000158397	6	10492223	10629368	glucosaminyl (N-acetyl) transferase 2, I-branching enzyme (I blood group) [Source:HGNC Symbol;Acc:HGNC:4204]
ENSG00000166501	PRKCB	3.82476	0.00226375	0.0353544	16	23836001	24220611	protein kinase C beta [Source:HGNC Symbol;Acc:HGNC:9395]
ENSG00000102032	RENBP	3.7996	0.00151922	0.0266947	X	153935263	153944691	renin binding protein [Source:HGNC Symbol;Acc:HGNC:9959]
ENSG00000253616	RP11-875O11.3	3.76605	0.00337065	0.0472299	8	23071377	23074488
ENSG00000128408	RIBC2	3.75031	0.000789185	0.0165361	22	45413691	45432496	RIB43A domain with coiled-coils 2 [Source:HGNC Symbol;Acc:HGNC:13241]
ENSG00000125998	FAM83C	3.74038	2.20846e-28	3.62574e-25	20	35285731	35292401	family with sequence similarity 83 member C [Source:HGNC Symbol;Acc:HGNC:16121]
ENSG00000034239	EFCAB1	3.73465	7.31829e-13	1.94835e-10	8	48710789	48735311	EF-hand calcium binding domain 1 [Source:HGNC Symbol;Acc:HGNC:25678]
ENSG00000279637	RP11-196B3.1	3.73268	0.0023047	0.0357844	18	79420836	79422780
ENSG00000231346	LINC01160	3.72191	3.73105e-10	6.12545e-08	1	111599655	111608723	long intergenic non-protein coding RNA 1160 [Source:HGNC Symbol;Acc:HGNC:49525]
ENSG00000185633	NDUFA4L2	3.71602	7.97729e-05	0.00281146	12	57234903	57240715	NDUFA4, mitochondrial complex associated like 2 [Source:HGNC Symbol;Acc:HGNC:29836]
ENSG00000102445	RUBCNL	3.70986	0.000273268	0.00754013	13	46342000	46438190	RUN and cysteine rich domain containing beclin 1 interacting protein like [Source:HGNC Symbol;Acc:HGNC:20420]
ENSG00000180730	SHISA2	3.70635	1.59945e-13	4.77436e-11	13	26044597	26051031	shisa family member 2 [Source:HGNC Symbol;Acc:HGNC:20366]
ENSG00000184588	PDE4B	3.70045	1.37797e-09	1.98155e-07	1	65792514	66374579	phosphodiesterase 4B [Source:HGNC Symbol;Acc:HGNC:8781]
ENSG00000135324	MRAP2	3.6984	1.726e-06	0.000110762	6	84033756	84090881	melanocortin 2 receptor accessory protein 2 [Source:HGNC Symbol;Acc:HGNC:21232]
ENSG00000178053	MLF1	3.6581	4.19002e-12	9.71148e-10	3	158571163	158607252	myeloid leukemia factor 1 [Source:HGNC Symbol;Acc:HGNC:7125]
ENSG00000126467	TSKS	3.65353	4.22893e-08	4.33927e-06	19	49739753	49763330	testis specific serine kinase substrate [Source:HGNC Symbol;Acc:HGNC:30719]
ENSG00000125508	SRMS	3.64963	1.24308e-07	1.11318e-05	20	63540810	63547504	src-related kinase lacking C-terminal regulatory tyrosine and N-terminal myristylation sites [Source:HGNC Symbol;Acc:HGNC:11298]
ENSG00000175352	NRIP3	3.64929	7.0221e-21	6.28829e-18	11	8980576	9004049	nuclear receptor interacting protein 3 [Source:HGNC Symbol;Acc:HGNC:1167]
ENSG00000160447	PKN3	3.63584	2.17598e-11	4.51252e-09	9	128702523	128720918	protein kinase N3 [Source:HGNC Symbol;Acc:HGNC:17999]
ENSG00000053438	NNAT	3.61716	0.00123288	0.0231103	20	37521215	37523693	neuronatin [Source:HGNC Symbol;Acc:HGNC:7860]
ENSG00000196503	ARL9	3.61094	1.15811e-06	7.81366e-05	4	56505209	56524448	ADP ribosylation factor like GTPase 9 [Source:HGNC Symbol;Acc:HGNC:23592]
ENSG00000212747	FAM127C	3.57074	9.79428e-13	2.57276e-10	X	135020504	135022529	family with sequence similarity 127 member C [Source:HGNC Symbol;Acc:HGNC:33156]
ENSG00000102854	MSLN	3.53605	9.81656e-08	8.95352e-06	16	760762	768865	mesothelin [Source:HGNC Symbol;Acc:HGNC:7371]
ENSG00000174945	AMZ1	3.51744	0.00258743	0.0388528	7	2679522	2775500	archaelysin family metallopeptidase 1 [Source:HGNC Symbol;Acc:HGNC:22231]
ENSG00000152661	GJA1	3.48757	1.64202e-12	3.99375e-10	6	121435692	121449727	gap junction protein alpha 1 [Source:HGNC Symbol;Acc:HGNC:4274]
ENSG00000174225	ARL13A	3.48337	0.000778819	0.0163751	X	100969708	100990829	ADP ribosylation factor like GTPase 13A [Source:HGNC Symbol;Acc:HGNC:31709]
ENSG00000206262	FOXL2NB	3.46594	0.000263636	0.00733601	3	138947234	138953451	FOXL2 neighbor [Source:HGNC Symbol;Acc:HGNC:34428]
ENSG00000142698	C1orf94	3.44313	0.000520178	0.0120141	1	34166883	34219131	chromosome 1 open reading frame 94 [Source:HGNC Symbol;Acc:HGNC:28250]
ENSG00000178934	LGALS7B	3.41443	3.9378e-23	5.54133e-20	19	38789211	38791749	galectin 7B [Source:HGNC Symbol;Acc:HGNC:34447]
ENSG00000128602	SMO	3.41098	1.47939e-14	5.29917e-12	7	129188872	129213545	smoothened, frizzled class receptor [Source:HGNC Symbol;Acc:HGNC:11119]
ENSG00000160401	CFAP157	3.40259	0.000300608	0.00808413	9	127706989	127716002	cilia and flagella associated protein 157 [Source:HGNC Symbol;Acc:HGNC:27843]
ENSG00000149243	KLHL35	3.39134	1.0691e-09	1.58364e-07	11	75422394	75430629	kelch like family member 35 [Source:HGNC Symbol;Acc:HGNC:26597]
ENSG00000092850	TEKT2	3.38463	0.00104524	0.0205513	1	36084075	36088275	tektin 2 [Source:HGNC Symbol;Acc:HGNC:11725]
ENSG00000235725	AC007389.3	3.33711	6.03071e-12	1.35012e-09	2	65589566	65640177
ENSG00000164867	NOS3	3.32325	7.52754e-06	0.000397587	7	150990995	151014588	nitric oxide synthase 3 [Source:HGNC Symbol;Acc:HGNC:7876]
ENSG00000178718	RPP25	3.30925	3.925e-13	1.10466e-10	15	74954416	74957464	ribonuclease P and MRP subunit p25 [Source:HGNC Symbol;Acc:HGNC:30361]
ENSG00000248323	LUCAT1	3.30081	0.001641	0.0282669	5	91303029	91314402	lung cancer associated transcript 1 (non-protein coding) [Source:HGNC Symbol;Acc:HGNC:48498]
ENSG00000146592	CREB5	3.28374	3.25742e-09	4.2783e-07	7	28299321	28825894	cAMP responsive element binding protein 5 [Source:HGNC Symbol;Acc:HGNC:16844]
ENSG00000108176	DNAJC12	3.25643	1.13655e-07	1.02242e-05	10	67796665	67838166	DnaJ heat shock protein family (Hsp40) member C12 [Source:HGNC Symbol;Acc:HGNC:28908]
ENSG00000260458	KCNJ18	3.25534	0.000990335	0.0197077	17	21692523	21704612	potassium voltage-gated channel subfamily J member 18 [Source:HGNC Symbol;Acc:HGNC:39080]
ENSG00000284237	RP11-328D5.4	3.25447	0.000195178	0.00586159	1	207959292	207969329
ENSG00000163520	FBLN2	3.24342	4.07803e-12	9.56444e-10	3	13549131	13638422	fibulin 2 [Source:HGNC Symbol;Acc:HGNC:3601]
ENSG00000122870	BICC1	3.24116	2.42083e-11	4.968e-09	10	58513140	58831437	BicC family RNA binding protein 1 [Source:HGNC Symbol;Acc:HGNC:19351]
ENSG00000106327	TFR2	3.23135	6.64799e-05	0.00240316	7	100620416	100642779	transferrin receptor 2 [Source:HGNC Symbol;Acc:HGNC:11762]
ENSG00000102802	MEDAG	3.21449	0.00338266	0.0472476	13	30906191	30925572	mesenteric estrogen dependent adipogenesis [Source:HGNC Symbol;Acc:HGNC:25926]
ENSG00000140986	RPL3L	3.20082	4.83965e-05	0.00187689	16	1943974	1957606	ribosomal protein L3 like [Source:HGNC Symbol;Acc:HGNC:10351]
ENSG00000138759	FRAS1	3.1997	3.09493e-09	4.14783e-07	4	78057570	78544269	Fraser extracellular matrix complex subunit 1 [Source:HGNC Symbol;Acc:HGNC:19185]
ENSG00000205358	MT1H	3.18914	0.000290288	0.00794302	16	56669814	56671129	metallothionein 1H [Source:HGNC Symbol;Acc:HGNC:7400]
ENSG00000166278	C2	3.17202	3.04401e-06	0.000179551	6	31897785	31945672	complement C2 [Source:HGNC Symbol;Acc:HGNC:1248]
ENSG00000114631	PODXL2	3.17056	0.00088611	0.018053	3	127629181	127672809	podocalyxin like 2 [Source:HGNC Symbol;Acc:HGNC:17936]
ENSG00000188921	HACD4	3.15453	4.96251e-07	3.67543e-05	9	20999515	21031636	3-hydroxyacyl-CoA dehydratase 4 [Source:HGNC Symbol;Acc:HGNC:20920]
ENSG00000185306	C12orf56	3.12287	2.62211e-05	0.00110855	12	64264762	64391192	chromosome 12 open reading frame 56 [Source:HGNC Symbol;Acc:HGNC:26967]
ENSG00000154760	SLFN13	3.11992	5.60598e-09	6.90271e-07	17	35435096	35448837	schlafen family member 13 [Source:HGNC Symbol;Acc:HGNC:26481]
ENSG00000167549	CORO6	3.11851	1.39558e-18	9.48078e-16	17	29614756	29622907	coronin 6 [Source:HGNC Symbol;Acc:HGNC:21356]
ENSG00000180438	TPRXL	3.09749	3.18277e-07	2.48824e-05	3	13937273	14082811	tetrapeptide repeat homeobox like [Source:HGNC Symbol;Acc:HGNC:32178]
ENSG00000158296	SLC13A3	3.07888	4.47142e-10	7.27307e-08	20	46557823	46684467	solute carrier family 13 member 3 [Source:HGNC Symbol;Acc:HGNC:14430]
ENSG00000166313	APBB1	3.03752	0.0025089	0.03808	11	6395124	6419414	amyloid beta precursor protein binding family B member 1 [Source:HGNC Symbol;Acc:HGNC:581]
ENSG00000167766	ZNF83	3.02908	7.28975e-09	8.81076e-07	19	52594060	52690496	zinc finger protein 83 [Source:HGNC Symbol;Acc:HGNC:13158]
ENSG00000205978	NYNRIN	2.99682	3.88142e-07	2.94107e-05	14	24398786	24419288	NYN domain and retroviral integrase containing [Source:HGNC Symbol;Acc:HGNC:20165]
ENSG00000259712	CTD-2184D3.5	2.98974	1.32732e-05	0.000649887	15	52056675	52100523
ENSG00000227591	RP1-28O10.1	2.9877	3.03333e-06	0.000179458	1	209661364	209724125
ENSG00000166813	KIF7	2.97748	6.36651e-10	9.95449e-08	15	89608789	89655451	kinesin family member 7 [Source:HGNC Symbol;Acc:HGNC:30497]
ENSG00000170323	FABP4	2.97655	0.00148656	0.0263622	8	81478419	81483263	fatty acid binding protein 4 [Source:HGNC Symbol;Acc:HGNC:3559]
ENSG00000129465	RIPK3	2.96479	8.72677e-08	8.10972e-06	14	24336021	24340045	receptor interacting serine/threonine kinase 3 [Source:HGNC Symbol;Acc:HGNC:10021]
ENSG00000159713	TPPP3	2.92581	2.7308e-19	2.06921e-16	16	67389809	67393535	tubulin polymerization promoting protein family member 3 [Source:HGNC Symbol;Acc:HGNC:24162]
ENSG00000179314	WSCD1	2.92502	6.26691e-11	1.18716e-08	17	5772234	6124427	WSC domain containing 1 [Source:HGNC Symbol;Acc:HGNC:29060]
ENSG00000180190	TDRP	2.91379	1.01646e-21	1.11252e-18	8	489792	545781	testis development related protein [Source:HGNC Symbol;Acc:HGNC:26951]
ENSG00000159899	NPR2	2.90535	8.44077e-09	9.95758e-07	9	35792154	35809732	natriuretic peptide receptor 2 [Source:HGNC Symbol;Acc:HGNC:7944]
ENSG00000100968	NFATC4	2.89825	1.98362e-07	1.62155e-05	14	24365673	24379604	nuclear factor of activated T-cells 4 [Source:HGNC Symbol;Acc:HGNC:7778]
ENSG00000182985	CADM1	2.88653	4.25991e-18	2.46837e-15	11	115169218	115504957	cell adhesion molecule 1 [Source:HGNC Symbol;Acc:HGNC:5951]
ENSG00000205426	KRT81	2.86926	0.00149544	0.0264704	12	52285913	52291534	keratin 81 [Source:HGNC Symbol;Acc:HGNC:6458]
ENSG00000279852	RP11-91J19.2	2.86898	3.36709e-05	0.00136471	8	486117	488512
ENSG00000279347	RP11-85I17.2	2.867	0.00246911	0.0377232	8	119838736	119840385
ENSG00000105639	JAK3	2.84763	0.000322051	0.00844836	19	17824780	17848071	Janus kinase 3 [Source:HGNC Symbol;Acc:HGNC:6193]
ENSG00000269001	CTD-2245F17.3	2.84679	0.00281273	0.0413843	19	53197111	53214522
ENSG00000079931	MOXD1	2.82579	0.00213156	0.0337146	6	132296055	132401545	monooxygenase DBH like 1 [Source:HGNC Symbol;Acc:HGNC:21063]
ENSG00000131067	GGT7	2.80232	8.40685e-18	4.55933e-15	20	34844720	34872860	gamma-glutamyltransferase 7 [Source:HGNC Symbol;Acc:HGNC:4259]
ENSG00000172927	MYEOV	2.79245	0.00221286	0.0346822	11	69294138	69367726	myeloma overexpressed [Source:HGNC Symbol;Acc:HGNC:7563]
ENSG00000132386	SERPINF1	2.78006	1.25236e-07	1.11641e-05	17	1761959	1777574	serpin family F member 1 [Source:HGNC Symbol;Acc:HGNC:8824]
ENSG00000261327	RP11-863P13.3	2.7765	0.00296348	0.0429261	16	88177298	88178941
ENSG00000228192	RP11-342M1.3	2.74366	0.000318925	0.00839992	1	42834681	42846422
ENSG00000170577	SIX2	2.71411	8.07069e-09	9.69516e-07	2	45005161	45009430	SIX homeobox 2 [Source:HGNC Symbol;Acc:HGNC:10888]
ENSG00000182272	B4GALNT4	2.69776	1.24844e-06	8.30512e-05	11	369796	382116	beta-1,4-N-acetyl-galactosaminyltransferase 4 [Source:HGNC Symbol;Acc:HGNC:26315]
ENSG00000224961	LINC01752	2.6918	0.000507368	0.0117735	20	10753090	10753966	long intergenic non-protein coding RNA 1752 [Source:HGNC Symbol;Acc:HGNC:52540]
ENSG00000108852	MPP2	2.68158	0.0011153	0.0214785	17	43875357	43909711	membrane palmitoylated protein 2 [Source:HGNC Symbol;Acc:HGNC:7220]
ENSG00000176595	KBTBD11	2.65269	1.95085e-05	0.000895889	8	1973878	2006936	kelch repeat and BTB domain containing 11 [Source:HGNC Symbol;Acc:HGNC:29104]
ENSG00000185513	L3MBTL1	2.64384	9.14219e-08	8.41637e-06	20	43507680	43550950	l(3)mbt-like 1 (Drosophila) [Source:HGNC Symbol;Acc:HGNC:15905]
ENSG00000255262	ELOBP2	2.63752	0.000297366	0.00804725	11	130032866	130033220	elongin B pseudogene 2 [Source:HGNC Symbol;Acc:HGNC:39720]
ENSG00000172548	NIPAL4	2.61433	3.61659e-10	5.98744e-08	5	157460019	157474717	NIPA like domain containing 4 [Source:HGNC Symbol;Acc:HGNC:28018]
ENSG00000172638	EFEMP2	2.60567	1.94361e-09	2.71568e-07	11	65866441	65873592	EGF containing fibulin like extracellular matrix protein 2 [Source:HGNC Symbol;Acc:HGNC:3219]
ENSG00000262681	RP11-311F12.1	2.6013	0.00146094	0.026047	17	19719059	19722428
ENSG00000170629	DPY19L2P2	2.58881	0.00269404	0.040087	7	103175133	103280410	DPY19L2 pseudogene 2 [Source:HGNC Symbol;Acc:HGNC:21764]
ENSG00000183971	NPW	2.58643	0.000305336	0.0081822	16	2009926	2020755	neuropeptide W [Source:HGNC Symbol;Acc:HGNC:30509]
ENSG00000148600	CDHR1	2.57589	1.94104e-09	2.71568e-07	10	84194635	84219621	cadherin related family member 1 [Source:HGNC Symbol;Acc:HGNC:14550]
ENSG00000124343	XG	2.56021	1.01657e-08	1.1712e-06	X	2752050	2815927	Xg blood group [Source:HGNC Symbol;Acc:HGNC:12806]
ENSG00000147257	GPC3	2.55787	0.0011444	0.0218468	X	133535745	133985895	glypican 3 [Source:HGNC Symbol;Acc:HGNC:4451]
ENSG00000136111	TBC1D4	2.54481	1.2303e-05	0.00061197	13	75284665	75482114	TBC1 domain family member 4 [Source:HGNC Symbol;Acc:HGNC:19165]
ENSG00000005379	TSPOAP1	2.54034	5.37368e-10	8.60707e-08	17	58301228	58328760	TSPO associated protein 1 [Source:HGNC Symbol;Acc:HGNC:16831]
ENSG00000233559	LINC00513	2.53763	0.001639	0.0282669	7	130853720	130928649	long intergenic non-protein coding RNA 513 [Source:HGNC Symbol;Acc:HGNC:43566]
ENSG00000229563	LINC01204	2.52883	2.09995e-05	0.000947517	X	45505388	45630202	long intergenic non-protein coding RNA 1204 [Source:HGNC Symbol;Acc:HGNC:49635]
ENSG00000167207	NOD2	2.51965	0.000629757	0.0140508	16	50693603	50733077	nucleotide binding oligomerization domain containing 2 [Source:HGNC Symbol;Acc:HGNC:5331]
ENSG00000272293	RP11-91J19.3	2.51392	6.27442e-06	0.000335903	8	450714	451343
ENSG00000178150	ZNF114	2.51152	0.000194065	0.00584599	19	48270102	48287608	zinc finger protein 114 [Source:HGNC Symbol;Acc:HGNC:12894]
ENSG00000185201	IFITM2	2.49921	7.98413e-08	7.56572e-06	11	307631	315272	interferon induced transmembrane protein 2 [Source:HGNC Symbol;Acc:HGNC:5413]
ENSG00000120471	TP53AIP1	2.49668	3.10659e-07	2.43837e-05	11	128934731	128943399	tumor protein p53 regulated apoptosis inducing protein 1 [Source:HGNC Symbol;Acc:HGNC:29984]
ENSG00000099256	PRTFDC1	2.49527	1.56016e-13	4.72872e-11	10	24848607	24952604	phosphoribosyl transferase domain containing 1 [Source:HGNC Symbol;Acc:HGNC:23333]
ENSG00000108839	ALOX12	2.48742	0.00084943	0.0175232	17	6996065	7010736	arachidonate 12-lipoxygenase, 12S type [Source:HGNC Symbol;Acc:HGNC:429]
ENSG00000165821	SALL2	2.4863	0.00058182	0.013145	14	21521081	21537216	spalt like transcription factor 2 [Source:HGNC Symbol;Acc:HGNC:10526]
ENSG00000274414	RP5-965G21.4	2.47002	2.46269e-05	0.00105933	20	25239007	25245229
ENSG00000130475	FCHO1	2.44397	0.000490332	0.0115137	19	17747718	17788568	FCH domain only 1 [Source:HGNC Symbol;Acc:HGNC:29002]
ENSG00000175567	UCP2	2.43995	0.00053715	0.0123338	11	73974667	73983307	uncoupling protein 2 [Source:HGNC Symbol;Acc:HGNC:12518]
ENSG00000184163	C1QTNF12	2.43365	1.05153e-05	0.00053392	1	1242446	1246722	C1q and tumor necrosis factor related protein 12 [Source:HGNC Symbol;Acc:HGNC:32308]
ENSG00000240137	ERICH6-AS1	2.41737	0.00286844	0.0419533	3	150703564	150720146	ERICH6 antisense RNA 1 [Source:HGNC Symbol;Acc:HGNC:41205]
ENSG00000284196	RP11-470M1.2	2.41673	0.00327832	0.046272	13	80041725	80074557
ENSG00000244274	DBNDD2	2.39332	6.65322e-10	1.02402e-07	20	45406057	45410610	dysbindin domain containing 2 [Source:HGNC Symbol;Acc:HGNC:15881]
ENSG00000128594	LRRC4	2.3879	1.18962e-05	0.000594839	7	128027071	128032107	leucine rich repeat containing 4 [Source:HGNC Symbol;Acc:HGNC:15586]
ENSG00000147642	SYBU	2.38701	1.28697e-05	0.000633865	8	109573978	109691791	syntabulin [Source:HGNC Symbol;Acc:HGNC:26011]
ENSG00000261777	RP11-529K1.2	2.3866	0.00189816	0.0313459	16	70315640	70346747
ENSG00000100628	ASB2	2.3824	0.000196148	0.00588176	14	93934153	93976791	ankyrin repeat and SOCS box containing 2 [Source:HGNC Symbol;Acc:HGNC:16012]
ENSG00000258245	RPL10P13	2.36677	0.000728637	0.0155188	12	75688794	75689096	ribosomal protein L10 pseudogene 13 [Source:HGNC Symbol;Acc:HGNC:52346]
ENSG00000130775	THEMIS2	2.35157	0.000427304	0.0104836	1	27872543	27886685	thymocyte selection associated family member 2 [Source:HGNC Symbol;Acc:HGNC:16839]
ENSG00000101004	NINL	2.34059	4.82822e-07	3.60306e-05	20	25452705	25585517	ninein like [Source:HGNC Symbol;Acc:HGNC:29163]
ENSG00000154556	SORBS2	2.32807	6.1526e-05	0.00229135	4	185585444	185956652	sorbin and SH3 domain containing 2 [Source:HGNC Symbol;Acc:HGNC:24098]
ENSG00000070087	PFN2	2.32183	1.69259e-07	1.43115e-05	3	149964904	150050788	profilin 2 [Source:HGNC Symbol;Acc:HGNC:8882]
ENSG00000231789	PIK3CD-AS2	2.31402	0.00108602	0.0210874	1	9672426	9687555	PIK3CD antisense RNA 2 [Source:HGNC Symbol;Acc:HGNC:51334]
ENSG00000074410	CA12	2.31313	2.31516e-06	0.000143431	15	63321378	63382161	carbonic anhydrase 12 [Source:HGNC Symbol;Acc:HGNC:1371]
ENSG00000198832	SELENOM	2.30632	0.000226436	0.00655068	22	31104772	31120069	selenoprotein M [Source:HGNC Symbol;Acc:HGNC:30397]
ENSG00000216775	RP1-152L7.5	2.28827	0.00123583	0.0231435	6	52665148	52669155
ENSG00000084110	HAL	2.28472	0.00320997	0.0456274	12	95972662	95996365	histidine ammonia-lyase [Source:HGNC Symbol;Acc:HGNC:4806]
ENSG00000228347	FTLP17	2.28094	0.00183765	0.0306549	1	104153306	104153830	ferritin light chain pseudogene 17 [Source:HGNC Symbol;Acc:HGNC:37967]
ENSG00000110693	SOX6	2.27177	2.48971e-06	0.000152803	11	15966449	16739591	SRY-box 6 [Source:HGNC Symbol;Acc:HGNC:16421]
ENSG00000197653	DNAH10	2.26933	8.24824e-05	0.00290176	12	123762188	123936206	dynein axonemal heavy chain 10 [Source:HGNC Symbol;Acc:HGNC:2941]
ENSG00000253669	KB-1732A1.1	2.26764	0.000108493	0.00363506	8	102805517	102809971
ENSG00000163623	NKX6-1	2.26052	0.00081361	0.0169081	4	84491987	84498450	NK6 homeobox 1 [Source:HGNC Symbol;Acc:HGNC:7839]
ENSG00000184060	ADAP2	2.24588	0.000210257	0.006201	17	30906344	30959322	ArfGAP with dual PH domains 2 [Source:HGNC Symbol;Acc:HGNC:16487]
ENSG00000280202	RP5-1180D12.1	2.24206	0.00014852	0.00466667	12	3610307	3612003
ENSG00000178860	MSC	2.24165	0.000149312	0.00468406	8	71841549	71844468	musculin [Source:HGNC Symbol;Acc:HGNC:7321]
ENSG00000129990	SYT5	2.22849	0.00195742	0.0318441	19	55171199	55180441	synaptotagmin 5 [Source:HGNC Symbol;Acc:HGNC:11513]
ENSG00000125726	CD70	2.22197	0.00122894	0.0230584	19	6583183	6604103	CD70 molecule [Source:HGNC Symbol;Acc:HGNC:11937]
ENSG00000142661	MYOM3	2.21082	0.000328214	0.00852965	1	24056035	24112175	myomesin 3 [Source:HGNC Symbol;Acc:HGNC:26679]
ENSG00000259341	RP11-20G13.1	2.21	3.19853e-05	0.00130464	15	99427009	99431028
ENSG00000197935	ZNF311	2.20641	6.45947e-05	0.00236539	6	28994785	29005316	zinc finger protein 311 [Source:HGNC Symbol;Acc:HGNC:13847]
ENSG00000164825	DEFB1	2.2008	0.00036921	0.00936141	8	6870575	6878022	defensin beta 1 [Source:HGNC Symbol;Acc:HGNC:2766]
ENSG00000135835	KIAA1614	2.19784	1.66656e-11	3.49286e-09	1	180913154	180951614	KIAA1614 [Source:HGNC Symbol;Acc:HGNC:29327]
ENSG00000262003	RP11-676J12.7	2.18855	0.00256183	0.0386452	17	909632	911212
ENSG00000105996	HOXA2	2.1827	0.000474402	0.0112334	7	27100354	27102811	homeobox A2 [Source:HGNC Symbol;Acc:HGNC:5103]
ENSG00000267151	MIR2117HG	2.17308	9.55245e-05	0.00326157	17	43444707	43451200	MIR2117 host gene [Source:HGNC Symbol;Acc:HGNC:51999]
ENSG00000130600	H19	2.16016	0.00189664	0.0313459	11	1995163	2001470	H19, imprinted maternally expressed transcript (non-protein coding) [Source:HGNC Symbol;Acc:HGNC:4713]
ENSG00000124875	CXCL6	2.15851	2.41323e-05	0.0010472	4	73836497	73849064	C-X-C motif chemokine ligand 6 [Source:HGNC Symbol;Acc:HGNC:10643]
ENSG00000228594	FNDC10	2.15741	7.45043e-06	0.000394572	1	1598012	1600096	fibronectin type III domain containing 10 [Source:HGNC Symbol;Acc:HGNC:42951]
ENSG00000128510	CPA4	2.15529	2.57848e-05	0.00109244	7	130293134	130324180	carboxypeptidase A4 [Source:HGNC Symbol;Acc:HGNC:15740]
ENSG00000168806	LCMT2	2.15235	2.34313e-05	0.0010281	15	43323649	43330605	leucine carboxyl methyltransferase 2 [Source:HGNC Symbol;Acc:HGNC:17558]
ENSG00000081237	PTPRC	2.14632	0.00325007	0.0459323	1	198638671	198757283	protein tyrosine phosphatase, receptor type C [Source:HGNC Symbol;Acc:HGNC:9666]
ENSG00000185905	C16orf54	2.13395	0.000309598	0.00823853	16	29742463	29746006	chromosome 16 open reading frame 54 [Source:HGNC Symbol;Acc:HGNC:26649]
ENSG00000178597	PSAPL1	2.12273	0.00151402	0.0266947	4	7430294	7434973	prosaposin-like 1 (gene/pseudogene) [Source:HGNC Symbol;Acc:HGNC:33131]
ENSG00000156966	B3GNT7	2.11982	1.44317e-05	0.000695158	2	231395543	231401164	UDP-GlcNAc:betaGal beta-1,3-N-acetylglucosaminyltransferase 7 [Source:HGNC Symbol;Acc:HGNC:18811]
ENSG00000258088	RP11-114H23.2	2.11925	0.000313576	0.00828118	12	75694010	75698816
ENSG00000137691	C11orf70	2.11328	6.12841e-05	0.00228666	11	102047443	102084560	chromosome 11 open reading frame 70 [Source:HGNC Symbol;Acc:HGNC:28188]
ENSG00000187678	SPRY4	2.11013	1.63352e-06	0.000105515	5	142310427	142326455	sprouty RTK signaling antagonist 4 [Source:HGNC Symbol;Acc:HGNC:15533]
ENSG00000167315	ACAA2	2.10109	5.73096e-13	1.54665e-10	18	49782167	49813960	acetyl-CoA acyltransferase 2 [Source:HGNC Symbol;Acc:HGNC:83]
ENSG00000166924	NYAP1	2.09979	0.000418927	0.0103295	7	100483927	100494799	neuronal tyrosine phosphorylated phosphoinositide-3-kinase adaptor 1 [Source:HGNC Symbol;Acc:HGNC:22009]
ENSG00000130038	CRACR2A	2.09844	3.1322e-09	4.16054e-07	12	3606633	3764819	calcium release activated channel regulator 2A [Source:HGNC Symbol;Acc:HGNC:28657]
ENSG00000172824	CES4A	2.09826	0.00120821	0.0227561	16	66988589	67009758	carboxylesterase 4A [Source:HGNC Symbol;Acc:HGNC:26741]
ENSG00000182366	FAM87A	2.09159	0.00241023	0.0370389	8	375931	383174	family with sequence similarity 87 member A [Source:EntrezGene;Acc:157693]
ENSG00000025423	HSD17B6	2.08165	1.79686e-07	1.49367e-05	12	56752161	56787790	hydroxysteroid 17-beta dehydrogenase 6 [Source:HGNC Symbol;Acc:HGNC:23316]
ENSG00000164241	C5orf63	2.07844	3.67228e-06	0.000212163	5	127042558	127073492	chromosome 5 open reading frame 63 [Source:HGNC Symbol;Acc:HGNC:40051]
ENSG00000066336	SPI1	2.06526	0.0011335	0.0216929	11	47354860	47378576	Spi-1 proto-oncogene [Source:HGNC Symbol;Acc:HGNC:11241]
ENSG00000146453	PNLDC1	2.05277	0.000191144	0.00576682	6	159800249	159820704	PARN like, ribonuclease domain containing 1 [Source:HGNC Symbol;Acc:HGNC:21185]
ENSG00000147872	PLIN2	2.05221	0.000627624	0.0140191	9	19108375	19149290	perilipin 2 [Source:HGNC Symbol;Acc:HGNC:248]
ENSG00000179046	TRIML2	2.04958	3.90373e-05	0.00155683	4	188091273	188109603	tripartite motif family like 2 [Source:HGNC Symbol;Acc:HGNC:26378]
ENSG00000198576	ARC	2.04514	0.000178115	0.00542357	8	142611044	142614472	activity regulated cytoskeleton associated protein [Source:HGNC Symbol;Acc:HGNC:648]
ENSG00000221947	XKR9	2.03524	5.03899e-06	0.000280433	8	70669365	70790371	XK related 9 [Source:HGNC Symbol;Acc:HGNC:20937]
ENSG00000256546	AC156455.1	2.03379	0.000616895	0.013858	12	122063306	122068616
ENSG00000245248	USP2-AS1	2.0337	1.53462e-07	1.32603e-05	11	119381778	119526664	USP2 antisense RNA 1 (head to head) [Source:HGNC Symbol;Acc:HGNC:48673]
ENSG00000121904	CSMD2	2.03095	0.000378704	0.00954072	1	33513999	34165842	CUB and Sushi multiple domains 2 [Source:HGNC Symbol;Acc:HGNC:19290]
ENSG00000113430	IRX4	2.01338	2.3365e-08	2.51538e-06	5	1877413	1887236	iroquois homeobox 4 [Source:HGNC Symbol;Acc:HGNC:6129]
ENSG00000139318	DUSP6	2.01084	8.27114e-21	7.08477e-18	12	89347232	89353271	dual specificity phosphatase 6 [Source:HGNC Symbol;Acc:HGNC:3072]
ENSG00000128298	BAIAP2L2	2.00855	7.98776e-08	7.56572e-06	22	38084889	38110670	BAI1 associated protein 2 like 2 [Source:HGNC Symbol;Acc:HGNC:26203]
ENSG00000003989	SLC7A2	2.0011	0.00258066	0.0388527	8	17497088	17570573	solute carrier family 7 member 2 [Source:HGNC Symbol;Acc:HGNC:11060]
ENSG00000089820	ARHGAP4	1.99988	0.000158965	0.00493191	X	153907367	153934999	Rho GTPase activating protein 4 [Source:HGNC Symbol;Acc:HGNC:674]
ENSG00000184368	MAP7D2	1.99086	3.54682e-06	0.000206124	X	20006713	20116917	MAP7 domain containing 2 [Source:HGNC Symbol;Acc:HGNC:25899]
ENSG00000277013	CTC-526N19.1	1.98109	0.00141708	0.0254725	19	33906352	33908391
ENSG00000230795	HLA-K	1.97973	2.5192e-08	2.66832e-06	6	29926459	29929232	major histocompatibility complex, class I, K (pseudogene) [Source:HGNC Symbol;Acc:HGNC:4969]
ENSG00000158716	DUSP23	1.97518	1.36398e-15	5.5983e-13	1	159780932	159782543	dual specificity phosphatase 23 [Source:HGNC Symbol;Acc:HGNC:21480]
ENSG00000229021	AL591893.1	1.94391	0.000151919	0.00473927	1	151994531	152042774
ENSG00000270061	RP11-214K3.19	1.9414	0.00344967	0.0476257	12	123969990	123970344
ENSG00000253258	RP11-539E17.5	1.94009	0.00182357	0.0304717	8	123181638	123182788
ENSG00000145283	SLC10A6	1.9388	0.000332447	0.0086065	4	86823468	86849263	solute carrier family 10 member 6 [Source:HGNC Symbol;Acc:HGNC:30603]
ENSG00000129467	ADCY4	1.93819	0.00164362	0.0282804	14	24318349	24335093	adenylate cyclase 4 [Source:HGNC Symbol;Acc:HGNC:235]
ENSG00000154553	PDLIM3	1.93755	0.00148083	0.0263064	4	185500660	185535612	PDZ and LIM domain 3 [Source:HGNC Symbol;Acc:HGNC:20767]
ENSG00000137875	BCL2L10	1.93471	0.00137439	0.0248534	15	52109263	52112775	BCL2 like 10 [Source:HGNC Symbol;Acc:HGNC:993]
ENSG00000283788	MIR936	1.93163	0.00172877	0.0294115	10	104048089	104048186	microRNA 936 [Source:HGNC Symbol;Acc:HGNC:33679]
ENSG00000260077	RP11-254F7.2	1.92873	0.00142289	0.0255189	2	10039092	10040663
ENSG00000166825	ANPEP	1.91519	0.00205192	0.0329192	15	89784889	89815401	alanyl aminopeptidase, membrane [Source:HGNC Symbol;Acc:HGNC:500]
ENSG00000136235	GPNMB	1.91349	2.55993e-05	0.00109122	7	23235967	23275108	glycoprotein nmb [Source:HGNC Symbol;Acc:HGNC:4462]
ENSG00000161835	GRASP	1.91033	0.000867204	0.0177597	12	52006940	52015889	general receptor for phosphoinositides 1 associated scaffold protein [Source:HGNC Symbol;Acc:HGNC:18707]
ENSG00000121743	GJA3	1.90405	0.000311633	0.00826309	13	20138255	20161049	gap junction protein alpha 3 [Source:HGNC Symbol;Acc:HGNC:4277]
ENSG00000225764	P3H2-AS1	1.90056	0.00359565	0.0490907	3	190120964	190144846	P3H2 antisense RNA 1 [Source:HGNC Symbol;Acc:HGNC:40886]
ENSG00000167771	RCOR2	1.90052	0.00229675	0.035713	11	63911221	63916844	REST corepressor 2 [Source:HGNC Symbol;Acc:HGNC:27455]
ENSG00000185339	TCN2	1.90038	0.00149517	0.0264704	22	30606838	30627278	transcobalamin 2 [Source:HGNC Symbol;Acc:HGNC:11653]
ENSG00000151617	EDNRA	1.89728	2.25064e-05	0.000994166	4	147480917	147544954	endothelin receptor type A [Source:HGNC Symbol;Acc:HGNC:3179]
ENSG00000104356	POP1	1.89106	0.000342471	0.00879665	8	98117297	98159834	POP1 homolog, ribonuclease P/MRP subunit [Source:HGNC Symbol;Acc:HGNC:30129]
ENSG00000100979	PLTP	1.88624	1.01579e-09	1.51607e-07	20	45898621	45912155	phospholipid transfer protein [Source:HGNC Symbol;Acc:HGNC:9093]
ENSG00000154016	GRAP	1.88155	0.000879962	0.0179649	17	19020673	19047637	GRB2-related adaptor protein [Source:HGNC Symbol;Acc:HGNC:4562]
ENSG00000175318	GRAMD2	1.87596	7.94811e-08	7.56572e-06	15	72159807	72197785	GRAM domain containing 2 [Source:HGNC Symbol;Acc:HGNC:27287]
ENSG00000123407	HOXC12	1.87017	0.000328205	0.00852965	12	53954834	53958956	homeobox C12 [Source:HGNC Symbol;Acc:HGNC:5124]
ENSG00000249816	LINC00964	1.8666	5.28014e-09	6.54239e-07	8	124848737	124954328	long intergenic non-protein coding RNA 964 [Source:HGNC Symbol;Acc:HGNC:27226]
ENSG00000225889	AC074289.1	1.86475	0.00178789	0.0299772	2	64143239	64252859
ENSG00000132932	ATP8A2	1.86078	3.31172e-09	4.29238e-07	13	25372071	26025851	ATPase phospholipid transporting 8A2 [Source:HGNC Symbol;Acc:HGNC:13533]
ENSG00000221994	ZNF630	1.84366	3.52661e-07	2.70342e-05	X	47983356	48071658	zinc finger protein 630 [Source:HGNC Symbol;Acc:HGNC:28855]
ENSG00000120915	EPHX2	1.8402	2.41524e-07	1.94214e-05	8	27490779	27545564	epoxide hydrolase 2 [Source:HGNC Symbol;Acc:HGNC:3402]
ENSG00000172379	ARNT2	1.8384	2.72695e-05	0.00114305	15	80404350	80597937	aryl hydrocarbon receptor nuclear translocator 2 [Source:HGNC Symbol;Acc:HGNC:16876]
ENSG00000229474	PATL2	1.83596	4.5011e-05	0.00175945	15	44665732	44711316	PAT1 homolog 2 [Source:HGNC Symbol;Acc:HGNC:33630]
ENSG00000162641	AKNAD1	1.82838	0.000169071	0.00520447	1	108815898	108858228	AKNA domain containing 1 [Source:HGNC Symbol;Acc:HGNC:28398]
ENSG00000150764	DIXDC1	1.82218	4.7841e-05	0.00186268	11	111927144	112022584	DIX domain containing 1 [Source:HGNC Symbol;Acc:HGNC:23695]
ENSG00000141753	IGFBP4	1.82174	0.000453339	0.0109586	17	40443461	40457731	insulin like growth factor binding protein 4 [Source:HGNC Symbol;Acc:HGNC:5473]
ENSG00000081985	IL12RB2	1.82026	6.7701e-05	0.00243784	1	67307364	67396900	interleukin 12 receptor subunit beta 2 [Source:HGNC Symbol;Acc:HGNC:5972]
ENSG00000103942	HOMER2	1.81994	0.000213875	0.00627349	15	82836946	82986153	homer scaffolding protein 2 [Source:HGNC Symbol;Acc:HGNC:17513]
ENSG00000177352	CCDC71	1.81906	0.000460638	0.0109963	3	49162535	49166321	coiled-coil domain containing 71 [Source:HGNC Symbol;Acc:HGNC:25760]
ENSG00000242041	RP11-70F11.2	1.81199	0.00339483	0.0472476	12	49863173	49863503
ENSG00000092758	COL9A3	1.8027	1.82915e-07	1.51412e-05	20	62816244	62841159	collagen type IX alpha 3 chain [Source:HGNC Symbol;Acc:HGNC:2219]
ENSG00000255874	LINC00346	1.80257	0.00128085	0.0237385	13	110863987	110870251	long intergenic non-protein coding RNA 346 [Source:HGNC Symbol;Acc:HGNC:27492]
ENSG00000173926	MARCH3	1.80077	0.00150021	0.0265311	5	126867714	127030808	membrane associated ring-CH-type finger 3 [Source:HGNC Symbol;Acc:HGNC:28728]
ENSG00000124256	ZBP1	1.79834	0.000296191	0.00804574	20	57603846	57620576	Z-DNA binding protein 1 [Source:HGNC Symbol;Acc:HGNC:16176]
ENSG00000160172	FAM86C2P	1.79542	4.84977e-05	0.00187712	11	67791648	67805336	family with sequence similarity 86 member C2, pseudogene [Source:HGNC Symbol;Acc:HGNC:42392]
ENSG00000186666	BCDIN3D	1.7947	0.000693668	0.0150014	12	49836039	49843129	BCDIN3 domain containing RNA methyltransferase [Source:HGNC Symbol;Acc:HGNC:27050]
ENSG00000278341	RP5-1142A6.10	1.79137	0.000359778	0.00916946	16	88708956	88710437
ENSG00000272711	RP11-259N19.1	1.79106	0.00342682	0.0474767	2	74832655	74833987
ENSG00000124257	NEURL2	1.79025	8.73333e-05	0.00304658	20	45888625	45891287	neuralized E3 ubiquitin protein ligase 2 [Source:HGNC Symbol;Acc:HGNC:16156]
ENSG00000260920	RP1-228H13.5	1.78555	0.00339555	0.0472476	1	40464319	40466767
ENSG00000254991	RP13-631K18.3	1.77922	0.000841683	0.0173861	11	12066929	12073014
ENSG00000214954	LRRC69	1.77588	0.00362495	0.0493881	8	91101832	91219236	leucine rich repeat containing 69 [Source:HGNC Symbol;Acc:HGNC:34303]
ENSG00000180938	ZNF572	1.77408	0.00275977	0.0408624	8	124973298	124979389	zinc finger protein 572 [Source:HGNC Symbol;Acc:HGNC:26758]
ENSG00000254548	RP11-429J17.5	1.76498	0.000806821	0.0168203	8	143718246	143718891
ENSG00000136274	NACAD	1.76377	9.13871e-05	0.00317534	7	45080438	45088914	NAC alpha domain containing [Source:HGNC Symbol;Acc:HGNC:22196]
ENSG00000136098	NEK3	1.75957	1.02926e-07	9.30156e-06	13	52132639	52159861	NIMA related kinase 3 [Source:HGNC Symbol;Acc:HGNC:7746]
ENSG00000168824	NSG1	1.75929	0.000201491	0.00599886	4	4348140	4419058	Neuron-specific protein family member 1 [Source:UniProtKB/Swiss-Prot;Acc:P42857]
ENSG00000125207	PIWIL1	1.75687	0.00332401	0.0466759	12	130337887	130372637	piwi like RNA-mediated gene silencing 1 [Source:HGNC Symbol;Acc:HGNC:9007]
ENSG00000172059	KLF11	1.74178	0.00052711	0.0121315	2	10042849	10054836	Kruppel like factor 11 [Source:HGNC Symbol;Acc:HGNC:11811]
ENSG00000144115	THNSL2	1.7405	2.07166e-09	2.85411e-07	2	88170295	88186636	threonine synthase like 2 [Source:HGNC Symbol;Acc:HGNC:25602]
ENSG00000228672	PROB1	1.7364	1.9855e-06	0.000124179	5	139390592	139395713	proline rich basic protein 1 [Source:HGNC Symbol;Acc:HGNC:41906]
ENSG00000162891	IL20	1.7313	0.00128417	0.0237564	1	206865354	206869223	interleukin 20 [Source:HGNC Symbol;Acc:HGNC:6002]
ENSG00000126803	HSPA2	1.7282	1.59301e-09	2.27419e-07	14	64535905	64546173	heat shock protein family A (Hsp70) member 2 [Source:HGNC Symbol;Acc:HGNC:5235]
ENSG00000134072	CAMK1	1.72698	0.00014126	0.00446703	3	9757342	9769992	calcium/calmodulin dependent protein kinase I [Source:HGNC Symbol;Acc:HGNC:1459]
ENSG00000162543	UBXN10	1.72098	0.000335746	0.00868048	1	20186085	20196048	UBX domain protein 10 [Source:HGNC Symbol;Acc:HGNC:26354]
ENSG00000112761	WISP3	1.7198	0.000121829	0.00398037	6	112054072	112070969	WNT1 inducible signaling pathway protein 3 [Source:HGNC Symbol;Acc:HGNC:12771]
ENSG00000171084	FAM86JP	1.71466	0.00115884	0.022101	3	125916620	125930024	family with sequence similarity 86 member J, pseudogene [Source:HGNC Symbol;Acc:HGNC:44097]
ENSG00000237813	AC002066.1	1.714	0.00176502	0.0297202	7	116238260	116499465
ENSG00000179859	AC025335.1	1.71397	2.6818e-08	2.82535e-06	17	7913324	7916276
ENSG00000207523	SNORA66	1.71021	0.00251735	0.0381202	1	92840719	92840851	small nucleolar RNA, H/ACA box 66 [Source:HGNC Symbol;Acc:HGNC:10223]
ENSG00000183734	ASCL2	1.69843	0.000127934	0.00415227	11	2268495	2270952	achaete-scute family bHLH transcription factor 2 [Source:HGNC Symbol;Acc:HGNC:739]
ENSG00000261716	RP11-196G18.22	1.69825	0.00119741	0.0226393	1	149844498	149849024
ENSG00000118707	TGIF2	1.69567	4.59293e-09	5.87567e-07	20	36573488	36593950	TGFB induced factor homeobox 2 [Source:HGNC Symbol;Acc:HGNC:15764]
ENSG00000234684	SDCBP2-AS1	1.68938	0.000780187	0.0163864	20	1325405	1378734	SDCBP2 antisense RNA 1 [Source:HGNC Symbol;Acc:HGNC:44314]
ENSG00000107954	NEURL1	1.6866	0.00125259	0.0233067	10	103493979	103592552	neuralized E3 ubiquitin protein ligase 1 [Source:HGNC Symbol;Acc:HGNC:7761]
ENSG00000090932	DLL3	1.68133	0.00129016	0.0238438	19	39498895	39508481	delta like canonical Notch ligand 3 [Source:HGNC Symbol;Acc:HGNC:2909]
ENSG00000197696	NMB	1.68132	4.2828e-05	0.00168536	15	84655129	84658563	neuromedin B [Source:HGNC Symbol;Acc:HGNC:7842]
ENSG00000117245	KIF17	1.68047	6.75778e-07	4.82373e-05	1	20664014	20718017	kinesin family member 17 [Source:HGNC Symbol;Acc:HGNC:19167]
ENSG00000215417	MIR17HG	1.68027	0.0014567	0.0260185	13	91347820	91354579	miR-17-92a-1 cluster host gene [Source:HGNC Symbol;Acc:HGNC:23564]
ENSG00000223573	TINCR	1.67334	3.49278e-13	9.97265e-11	19	5558167	5568034	tissue differentiation-inducing non-protein coding RNA [Source:HGNC Symbol;Acc:HGNC:14607]
ENSG00000119866	BCL11A	1.67133	0.000124767	0.00406958	2	60451167	60553567	B-cell CLL/lymphoma 11A [Source:HGNC Symbol;Acc:HGNC:13221]
ENSG00000159674	SPON2	1.6676	0.00258509	0.0388527	4	1166932	1208962	spondin 2 [Source:HGNC Symbol;Acc:HGNC:11253]
ENSG00000187105	HEATR4	1.66062	0.000644449	0.0142017	14	73478484	73558947	HEAT repeat containing 4 [Source:HGNC Symbol;Acc:HGNC:16761]
ENSG00000170786	SDR16C5	1.65517	0.000438182	0.0106707	8	56300010	56320776	short chain dehydrogenase/reductase family 16C member 5 [Source:HGNC Symbol;Acc:HGNC:30311]
ENSG00000185730	ZNF696	1.64866	0.00188747	0.0312742	8	143289676	143298061	zinc finger protein 696 [Source:HGNC Symbol;Acc:HGNC:25872]
ENSG00000089250	NOS1	1.64848	0.000297837	0.00804896	12	117208142	117452170	nitric oxide synthase 1 [Source:HGNC Symbol;Acc:HGNC:7872]
ENSG00000185909	KLHDC8B	1.64276	6.26228e-09	7.66293e-07	3	49171611	49176486	kelch domain containing 8B [Source:HGNC Symbol;Acc:HGNC:28557]
ENSG00000255248	MIR100HG	1.6395	9.89552e-10	1.48818e-07	11	122028327	122556721	mir-100-let-7a-2 cluster host gene [Source:HGNC Symbol;Acc:HGNC:39522]
ENSG00000256612	CYP2B7P	1.62937	0.00116601	0.0221947	19	40924219	40950660	cytochrome P450 family 2 subfamily B member 7, pseudogene [Source:HGNC Symbol;Acc:HGNC:2616]
ENSG00000183914	DNAH2	1.62381	0.000155783	0.00484847	17	7717354	7833744	dynein axonemal heavy chain 2 [Source:HGNC Symbol;Acc:HGNC:2948]
ENSG00000159433	STARD9	1.61628	0.0025845	0.0388527	15	42575659	42720981	StAR related lipid transfer domain containing 9 [Source:HGNC Symbol;Acc:HGNC:19162]
ENSG00000197766	CFD	1.6126	5.7482e-05	0.00216117	19	859643	863630	complement factor D [Source:HGNC Symbol;Acc:HGNC:2771]
ENSG00000251003	ZFPM2-AS1	1.60018	0.000488897	0.0114937	8	105780246	106060524	ZFPM2 antisense RNA 1 [Source:HGNC Symbol;Acc:HGNC:50698]
ENSG00000163710	PCOLCE2	1.5995	0.00249304	0.0379269	3	142815922	142889203	procollagen C-endopeptidase enhancer 2 [Source:HGNC Symbol;Acc:HGNC:8739]
ENSG00000245848	CEBPA	1.59483	0.00050698	0.0117735	19	33299934	33302564	CCAAT/enhancer binding protein alpha [Source:HGNC Symbol;Acc:HGNC:1833]
ENSG00000115738	ID2	1.59022	0.00032678	0.00851573	2	8678845	8684453	inhibitor of DNA binding 2, HLH protein [Source:HGNC Symbol;Acc:HGNC:5361]
ENSG00000183770	FOXL2	1.58899	8.7372e-05	0.00304658	3	138944224	138947140	forkhead box L2 [Source:HGNC Symbol;Acc:HGNC:1092]
ENSG00000177551	NHLH2	1.57434	0.000733125	0.0155975	1	115836377	115843917	nescient helix-loop-helix 2 [Source:HGNC Symbol;Acc:HGNC:7818]
ENSG00000167994	RAB3IL1	1.5574	9.5938e-06	0.000492207	11	61897301	61920269	RAB3A interacting protein like 1 [Source:HGNC Symbol;Acc:HGNC:9780]
ENSG00000250714	RP11-1149O23.4	1.55596	0.000259376	0.00722768	8	23225233	23230915
ENSG00000119703	ZC2HC1C	1.55337	0.0021062	0.0335442	14	75064170	75079987	zinc finger C2HC-type containing 1C [Source:HGNC Symbol;Acc:HGNC:20354]
ENSG00000167723	TRPV3	1.55245	0.000694445	0.0150014	17	3510502	3557995	transient receptor potential cation channel subfamily V member 3 [Source:HGNC Symbol;Acc:HGNC:18084]
ENSG00000249641	HOXC13-AS	1.55027	0.000814657	0.0169121	12	53935328	53939643	HOXC13 antisense RNA [Source:HGNC Symbol;Acc:HGNC:43753]
ENSG00000106278	PTPRZ1	1.54705	0.00357173	0.0488657	7	121873089	122062036	protein tyrosine phosphatase, receptor type Z1 [Source:HGNC Symbol;Acc:HGNC:9685]
ENSG00000197948	FCHSD1	1.54638	0.00178193	0.0299028	5	141639302	141651419	FCH and double SH3 domains 1 [Source:HGNC Symbol;Acc:HGNC:25463]
ENSG00000128714	HOXD13	1.54638	0.00145823	0.0260222	2	176092891	176095938	homeobox D13 [Source:HGNC Symbol;Acc:HGNC:5136]
ENSG00000261326	LINC01355	1.54453	0.00152177	0.0266947	1	23281309	23286752	long intergenic non-protein coding RNA 1355 [Source:HGNC Symbol;Acc:HGNC:50584]
ENSG00000197363	ZNF517	1.53707	0.000152034	0.00473927	8	144798876	144811169	zinc finger protein 517 [Source:HGNC Symbol;Acc:HGNC:27984]
ENSG00000162194	LBHD1	1.53672	0.00113224	0.0216929	11	62662817	62672255	LBH domain containing 1 [Source:HGNC Symbol;Acc:HGNC:28351]
ENSG00000071859	FAM50A	1.53652	0.00071791	0.0153788	X	154444126	154450654	family with sequence similarity 50 member A [Source:HGNC Symbol;Acc:HGNC:18786]
ENSG00000115598	IL1RL2	1.53042	2.50644e-05	0.00107346	2	102186973	102240002	interleukin 1 receptor like 2 [Source:HGNC Symbol;Acc:HGNC:5999]
ENSG00000207110	RNU1-106P	1.52822	0.000236464	0.00676437	8	127999131	127999294	RNA, U1 small nuclear 106, pseudogene [Source:HGNC Symbol;Acc:HGNC:48448]
ENSG00000173805	HAP1	1.52243	0.00046267	0.0110085	17	41717742	41734644	huntingtin associated protein 1 [Source:HGNC Symbol;Acc:HGNC:4812]
ENSG00000136167	LCP1	1.52155	1.49592e-05	0.000710149	13	46125920	46211871	lymphocyte cytosolic protein 1 [Source:HGNC Symbol;Acc:HGNC:6528]
ENSG00000186056	MATN1-AS1	1.52094	0.000328846	0.00852965	1	30718504	30726827	MATN1 antisense RNA 1 [Source:HGNC Symbol;Acc:HGNC:40364]
ENSG00000229618	AC011288.2	1.51997	5.09913e-05	0.00193934	7	12726152	13751920
ENSG00000237489	LINC00959	1.51232	0.000632629	0.0140671	10	130063900	130110817	long intergenic non-protein coding RNA 959 [Source:HGNC Symbol;Acc:HGNC:48677]
ENSG00000136158	SPRY2	1.50487	0.00249676	0.0379543	13	80335976	80340951	sprouty RTK signaling antagonist 2 [Source:HGNC Symbol;Acc:HGNC:11270]
ENSG00000139438	FAM222A	1.50443	0.00270694	0.0401577	12	109714228	109770507	family with sequence similarity 222 member A [Source:HGNC Symbol;Acc:HGNC:25915]
ENSG00000183508	FAM46C	1.49487	0.00165617	0.0284466	1	117605934	117628372	family with sequence similarity 46 member C [Source:HGNC Symbol;Acc:HGNC:24712]
ENSG00000187775	DNAH17	1.49228	0.00194951	0.0317941	17	78423697	78577394	dynein axonemal heavy chain 17 [Source:HGNC Symbol;Acc:HGNC:2946]
ENSG00000257433	RP1-197B17.3	1.49193	0.000687633	0.0149361	12	47706085	47742294
ENSG00000164687	FABP5	1.47895	0.00137391	0.0248534	8	81280363	81284777	fatty acid binding protein 5 [Source:HGNC Symbol;Acc:HGNC:3560]
ENSG00000173727	CMB9-22P13.1	1.4745	0.0029064	0.0423826	11	65455258	65466720
ENSG00000149582	TMEM25	1.47276	6.59747e-08	6.40279e-06	11	118531041	118547280	transmembrane protein 25 [Source:HGNC Symbol;Acc:HGNC:25890]
ENSG00000227533	SLC2A1-AS1	1.47193	0.000296901	0.00804574	1	42959049	42983358	SLC2A1 antisense RNA 1 [Source:HGNC Symbol;Acc:HGNC:44187]
ENSG00000186812	ZNF397	1.46838	0.000212924	0.00626714	18	35241030	35267133	zinc finger protein 397 [Source:HGNC Symbol;Acc:HGNC:18818]
ENSG00000164949	GEM	1.46021	0.000110724	0.00368474	8	94249253	94262350	GTP binding protein overexpressed in skeletal muscle [Source:HGNC Symbol;Acc:HGNC:4234]
ENSG00000166816	LDHD	1.46018	0.000600906	0.0135297	16	75111860	75116771	lactate dehydrogenase D [Source:HGNC Symbol;Acc:HGNC:19708]
ENSG00000136059	VILL	1.45893	0.00212746	0.0336921	3	37988059	38007188	villin like [Source:HGNC Symbol;Acc:HGNC:30906]
ENSG00000018280	SLC11A1	1.45887	0.00210214	0.0335067	2	218382029	218396894	solute carrier family 11 member 1 [Source:HGNC Symbol;Acc:HGNC:10907]
ENSG00000124217	MOCS3	1.44939	0.00251381	0.0380959	20	50958826	50963931	molybdenum cofactor synthesis 3 [Source:HGNC Symbol;Acc:HGNC:15765]
ENSG00000185652	NTF3	1.44908	0.00131018	0.024011	12	5432112	5521536	neurotrophin 3 [Source:HGNC Symbol;Acc:HGNC:8023]
ENSG00000179041	RRS1	1.44095	0.000567366	0.0129072	8	66429028	66430733	ribosome biogenesis regulator homolog [Source:HGNC Symbol;Acc:HGNC:17083]
ENSG00000141384	TAF4B	1.4366	1.2363e-05	0.00061197	18	26225936	26391685	TATA-box binding protein associated factor 4b [Source:HGNC Symbol;Acc:HGNC:11538]
ENSG00000169955	ZNF747	1.43649	0.00313624	0.0447408	16	30530367	30535347	zinc finger protein 747 [Source:HGNC Symbol;Acc:HGNC:28350]
ENSG00000170525	PFKFB3	1.43403	2.1851e-05	0.000976158	10	6144934	6254644	6-phosphofructo-2-kinase/fructose-2,6-biphosphatase 3 [Source:HGNC Symbol;Acc:HGNC:8874]
ENSG00000149212	SESN3	1.42839	0.00195487	0.0318288	11	95165513	95232541	sestrin 3 [Source:HGNC Symbol;Acc:HGNC:23060]
ENSG00000184635	ZNF93	1.42076	0.000215823	0.0063085	19	19900913	19935575	zinc finger protein 93 [Source:HGNC Symbol;Acc:HGNC:13169]
ENSG00000196378	ZNF34	1.41994	4.95315e-05	0.0019059	8	144773114	144787345	zinc finger protein 34 [Source:HGNC Symbol;Acc:HGNC:13098]
ENSG00000125864	BFSP1	1.41686	1.4469e-06	9.48945e-05	20	17493905	17569220	beaded filament structural protein 1 [Source:HGNC Symbol;Acc:HGNC:1040]
ENSG00000266088	RP5-1028K7.2	1.41485	0.000641622	0.0141992	17	40517026	40527002
ENSG00000203721	LINC00862	1.41437	0.000790211	0.0165361	1	200253419	200400705	long intergenic non-protein coding RNA 862 [Source:HGNC Symbol;Acc:HGNC:21901]
ENSG00000158406	HIST1H4H	1.41343	0.00167641	0.0287191	6	26277609	26285638	histone cluster 1 H4 family member h [Source:HGNC Symbol;Acc:HGNC:4788]
ENSG00000064270	ATP2C2	1.41112	0.00218013	0.0343057	16	84368527	84464187	ATPase secretory pathway Ca2+ transporting 2 [Source:HGNC Symbol;Acc:HGNC:29103]
ENSG00000104369	JPH1	1.40909	7.14016e-05	0.00255761	8	74234700	74321328	junctophilin 1 [Source:HGNC Symbol;Acc:HGNC:14201]
ENSG00000189431	RASSF10	1.40074	2.22782e-05	0.000988522	11	13009577	13012106	Ras association domain family member 10 [Source:HGNC Symbol;Acc:HGNC:33984]
ENSG00000249673	NOP14-AS1	1.39722	0.00211587	0.0335897	4	2934899	2961738	NOP14 antisense RNA 1 [Source:HGNC Symbol;Acc:HGNC:20205]
ENSG00000243244	STON1	1.39536	2.67672e-07	2.12637e-05	2	48529383	48598513	stonin 1 [Source:HGNC Symbol;Acc:HGNC:17003]
ENSG00000273329	RP11-448A19.1	1.39375	0.000693676	0.0150014	7	129604548	129611630
ENSG00000114405	C3orf14	1.39115	2.98058e-06	0.000176868	3	62318973	62336213	chromosome 3 open reading frame 14 [Source:HGNC Symbol;Acc:HGNC:25024]
ENSG00000066468	FGFR2	1.38393	0.00105098	0.0206023	10	121478334	121598458	fibroblast growth factor receptor 2 [Source:HGNC Symbol;Acc:HGNC:3689]
ENSG00000179388	EGR3	1.37676	0.00252567	0.0382168	8	22687659	22693302	early growth response 3 [Source:HGNC Symbol;Acc:HGNC:3240]
ENSG00000170298	LGALS9B	1.37561	0.00049838	0.0116388	17	20449395	20467539	galectin 9B [Source:HGNC Symbol;Acc:HGNC:24842]
ENSG00000019485	PRDM11	1.37539	2.35802e-06	0.000145628	11	45095806	45235110	PR/SET domain 11 [Source:HGNC Symbol;Acc:HGNC:13996]
ENSG00000241852	C8orf58	1.36215	5.79459e-06	0.000313624	8	22599601	22604150	chromosome 8 open reading frame 58 [Source:HGNC Symbol;Acc:HGNC:32233]
ENSG00000257702	LBX2-AS1	1.35928	0.000281474	0.00773405	2	74502595	74504678	LBX2 antisense RNA 1 [Source:HGNC Symbol;Acc:HGNC:25136]
ENSG00000099625	CBARP	1.35908	0.00186491	0.0309786	19	1228287	1238027	CACN beta subunit associated regulatory protein [Source:HGNC Symbol;Acc:HGNC:28617]
ENSG00000251136	RP11-37B2.1	1.35843	7.52856e-05	0.00267244	8	89609409	89757727
ENSG00000197580	BCO2	1.35185	0.00109566	0.0211623	11	112175467	112224699	beta-carotene oxygenase 2 [Source:HGNC Symbol;Acc:HGNC:18503]
ENSG00000151240	DIP2C	1.35169	3.93633e-05	0.0015635	10	274190	689668	disco interacting protein 2 homolog C [Source:HGNC Symbol;Acc:HGNC:29150]
ENSG00000179598	PLD6	1.3491	9.73012e-07	6.65601e-05	17	17200995	17206315	phospholipase D family member 6 [Source:HGNC Symbol;Acc:HGNC:30447]
ENSG00000140057	AK7	1.34069	0.00129573	0.0239019	14	96392111	96489427	adenylate kinase 7 [Source:HGNC Symbol;Acc:HGNC:20091]
ENSG00000259820	AC083843.1	1.33833	1.49548e-05	0.000710149	8	134792020	134798272
ENSG00000197181	PIWIL2	1.33085	0.000309679	0.00823853	8	22275297	22357563	piwi like RNA-mediated gene silencing 2 [Source:HGNC Symbol;Acc:HGNC:17644]
ENSG00000027869	SH2D2A	1.32892	0.000308692	0.00823853	1	156806243	156816862	SH2 domain containing 2A [Source:HGNC Symbol;Acc:HGNC:10821]
ENSG00000169918	OTUD7A	1.32819	0.00109443	0.0211593	15	31475398	31870789	OTU deubiquitinase 7A [Source:HGNC Symbol;Acc:HGNC:20718]
ENSG00000172748	ZNF596	1.32806	0.00139749	0.0252124	8	232137	264703	zinc finger protein 596 [Source:HGNC Symbol;Acc:HGNC:27268]
ENSG00000230088	KRT16P5	1.32793	0.000344708	0.00884256	17	20493634	20494155	keratin 16 pseudogene 5 [Source:HGNC Symbol;Acc:HGNC:37810]
ENSG00000169239	CA5B	1.32686	1.47837e-05	0.000706926	X	15688830	15788409	carbonic anhydrase 5B [Source:HGNC Symbol;Acc:HGNC:1378]
ENSG00000157168	NRG1	1.32666	5.30976e-05	0.00200782	8	31639386	32767959	neuregulin 1 [Source:HGNC Symbol;Acc:HGNC:7997]
ENSG00000116141	MARK1	1.32235	8.45155e-07	5.84224e-05	1	220528183	220664461	microtubule affinity regulating kinase 1 [Source:HGNC Symbol;Acc:HGNC:6896]
ENSG00000147364	FBXO25	1.32185	0.000280103	0.00771568	8	406428	477967	F-box protein 25 [Source:HGNC Symbol;Acc:HGNC:13596]
ENSG00000007516	BAIAP3	1.31992	0.00315409	0.044963	16	1333601	1349441	BAI1 associated protein 3 [Source:HGNC Symbol;Acc:HGNC:948]
ENSG00000111012	CYP27B1	1.31814	0.00211064	0.0335728	12	57762334	57768986	cytochrome P450 family 27 subfamily B member 1 [Source:HGNC Symbol;Acc:HGNC:2606]
ENSG00000240875	LINC00886	1.31094	0.000339454	0.00874194	3	156747346	156817062	long intergenic non-protein coding RNA 886 [Source:HGNC Symbol;Acc:HGNC:48572]
ENSG00000158792	SPATA2L	1.3099	0.0023407	0.0362248	16	89696343	89701705	spermatogenesis associated 2 like [Source:HGNC Symbol;Acc:HGNC:28393]
ENSG00000184574	LPAR5	1.30886	9.43657e-06	0.000486736	12	6618835	6636447	lysophosphatidic acid receptor 5 [Source:HGNC Symbol;Acc:HGNC:13307]
ENSG00000184860	SDR42E1	1.30622	0.00181104	0.0302881	16	81988855	82011488	short chain dehydrogenase/reductase family 42E, member 1 [Source:HGNC Symbol;Acc:HGNC:29834]
ENSG00000104689	TNFRSF10A	1.30032	0.000320266	0.00842397	8	23190452	23225126	TNF receptor superfamily member 10a [Source:HGNC Symbol;Acc:HGNC:11904]
ENSG00000212719	C17orf51	1.29953	1.78256e-05	0.000822439	17	21524790	21574458	chromosome 17 open reading frame 51 [Source:HGNC Symbol;Acc:HGNC:27904]
ENSG00000283196	RP4-614C10.2	1.29913	6.31873e-05	0.00233362	2	89542842	89585652
ENSG00000198807	PAX9	1.29857	0.000136726	0.00437278	14	36657568	36679715	paired box 9 [Source:HGNC Symbol;Acc:HGNC:8623]
ENSG00000171916	LGALS9C	1.29649	0.00173402	0.02945	17	18476737	18494945	galectin 9C [Source:HGNC Symbol;Acc:HGNC:33874]
ENSG00000106976	DNM1	1.29557	0.00177708	0.0298468	9	128191655	128255248	dynamin 1 [Source:HGNC Symbol;Acc:HGNC:2972]
ENSG00000101096	NFATC2	1.29176	0.000643556	0.0141992	20	51386957	51562831	nuclear factor of activated T-cells 2 [Source:HGNC Symbol;Acc:HGNC:7776]
ENSG00000261324	RP11-174G6.5	1.28578	0.0010083	0.0199644	12	14762504	14767931
ENSG00000152518	ZFP36L2	1.27596	4.521e-06	0.000256681	2	43222402	43226609	ZFP36 ring finger protein like 2 [Source:HGNC Symbol;Acc:HGNC:1108]
ENSG00000115525	ST3GAL5	1.27285	7.76307e-06	0.000408756	2	85837120	85905199	ST3 beta-galactoside alpha-2,3-sialyltransferase 5 [Source:HGNC Symbol;Acc:HGNC:10872]
ENSG00000203499	FAM83H-AS1	1.26385	8.42289e-05	0.00295792	8	143734140	143790644	FAM83H antisense RNA 1 (head to head) [Source:HGNC Symbol;Acc:HGNC:48720]
ENSG00000184702	SEPT5	1.26325	0.00296546	0.0429261	22	19714464	19724772	septin 5 [Source:HGNC Symbol;Acc:HGNC:9164]
ENSG00000179886	TIGD5	1.26303	0.00164141	0.0282669	8	143597835	143603224	tigger transposable element derived 5 [Source:HGNC Symbol;Acc:HGNC:18336]
ENSG00000114450	GNB4	1.25872	0.000324846	0.00847653	3	179396089	179451590	G protein subunit beta 4 [Source:HGNC Symbol;Acc:HGNC:20731]
ENSG00000268858	RP4-591C20.9	1.25731	0.000864798	0.0177288	20	63861212	63864293
ENSG00000189223	PAX8-AS1	1.2542	0.000753779	0.015952	2	113211522	113276581	PAX8 antisense RNA 1 [Source:HGNC Symbol;Acc:HGNC:49271]
ENSG00000127152	BCL11B	1.24723	0.000415052	0.0103208	14	99169287	99271524	B-cell CLL/lymphoma 11B [Source:HGNC Symbol;Acc:HGNC:13222]
ENSG00000118971	CCND2	1.24346	6.56305e-05	0.00239442	12	4273772	4305350	cyclin D2 [Source:HGNC Symbol;Acc:HGNC:1583]
ENSG00000196756	SNHG17	1.24187	1.36141e-05	0.000663889	20	38420588	38435353	small nucleolar RNA host gene 17 [Source:HGNC Symbol;Acc:HGNC:48600]
ENSG00000037965	HOXC8	1.24014	6.78107e-05	0.00243784	12	54009106	54012362	homeobox C8 [Source:HGNC Symbol;Acc:HGNC:5129]
ENSG00000170549	IRX1	1.23524	0.00207388	0.0331904	5	3596054	3601403	iroquois homeobox 1 [Source:HGNC Symbol;Acc:HGNC:14358]
ENSG00000240891	PLCXD2	1.22831	0.0015787	0.0274509	3	111674676	111846447	phosphatidylinositol specific phospholipase C X domain containing 2 [Source:HGNC Symbol;Acc:HGNC:26462]
ENSG00000119630	PGF	1.22605	0.00362081	0.0493658	14	74941834	74955784	placental growth factor [Source:HGNC Symbol;Acc:HGNC:8893]
ENSG00000248124	RRN3P1	1.22307	0.000268418	0.00743756	16	21796106	21820410	RRN3 homolog, RNA polymerase I transcription factor pseudogene 1 [Source:HGNC Symbol;Acc:HGNC:30548]
ENSG00000172315	TP53RK	1.2228	0.000454117	0.0109639	20	46684365	46689779	TP53 regulating kinase [Source:HGNC Symbol;Acc:HGNC:16197]
ENSG00000132623	ANKEF1	1.22149	0.00191282	0.0314622	20	9986126	10058303	ankyrin repeat and EF-hand domain containing 1 [Source:HGNC Symbol;Acc:HGNC:15803]
ENSG00000151376	ME3	1.21891	9.41458e-05	0.0032384	11	86441108	86672636	malic enzyme 3 [Source:HGNC Symbol;Acc:HGNC:6985]
ENSG00000095397	WHRN	1.21603	2.6236e-06	0.000158397	9	114402080	114505450	whirlin [Source:HGNC Symbol;Acc:HGNC:16361]
ENSG00000198169	ZNF251	1.21541	7.9751e-05	0.00281146	8	144720907	144756417	zinc finger protein 251 [Source:HGNC Symbol;Acc:HGNC:13045]
ENSG00000249859	PVT1	1.21521	7.39004e-07	5.21832e-05	8	127794533	128101253	Pvt1 oncogene (non-protein coding) [Source:HGNC Symbol;Acc:HGNC:9709]
ENSG00000147650	LRP12	1.21418	0.000556919	0.0127284	8	104489231	104589024	LDL receptor related protein 12 [Source:HGNC Symbol;Acc:HGNC:31708]
ENSG00000185189	NRBP2	1.21177	0.00339323	0.0472476	8	143833594	143840974	nuclear receptor binding protein 2 [Source:HGNC Symbol;Acc:HGNC:19339]
ENSG00000204856	FAM216A	1.2083	0.000894824	0.0181929	12	110468364	110490385	family with sequence similarity 216 member A [Source:HGNC Symbol;Acc:HGNC:30180]
ENSG00000231999	FLJ27354	1.20723	0.00291302	0.0423836	1	89583241	89632894	uncharacterized LOC400761 [Source:EntrezGene;Acc:400761]
ENSG00000163293	NIPAL1	1.20473	0.00102253	0.0201853	4	47914142	48040173	NIPA like domain containing 1 [Source:HGNC Symbol;Acc:HGNC:27194]
ENSG00000105464	GRIN2D	1.20145	0.00210205	0.0335067	19	48394875	48444931	glutamate ionotropic receptor NMDA type subunit 2D [Source:HGNC Symbol;Acc:HGNC:4588]
ENSG00000234155	RP11-30P6.6	1.19849	0.00100654	0.0199496	6	85387219	85390186
ENSG00000241170	RP11-147I3.1	1.1918	0.00344298	0.0475667	11	74876286	74920022
ENSG00000108515	ENO3	1.1905	2.13841e-05	0.000959655	17	4948092	4957131	enolase 3 [Source:HGNC Symbol;Acc:HGNC:3354]
ENSG00000136161	RCBTB2	1.18872	2.51823e-05	0.00107618	13	48488959	48533256	RCC1 and BTB domain containing protein 2 [Source:HGNC Symbol;Acc:HGNC:1914]
ENSG00000226419	SLC16A1-AS1	1.17654	0.000120039	0.00395465	1	112956415	113047055	SLC16A1 antisense RNA 1 [Source:HGNC Symbol;Acc:HGNC:49445]
ENSG00000181135	ZNF707	1.17626	3.3735e-05	0.00136471	8	143684452	143713898	zinc finger protein 707 [Source:HGNC Symbol;Acc:HGNC:27815]
ENSG00000162639	HENMT1	1.1716	0.000457234	0.0109903	1	108648290	108661526	HEN1 methyltransferase homolog 1 [Source:HGNC Symbol;Acc:HGNC:26400]
ENSG00000223572	CKMT1A	1.17108	2.43499e-05	0.00104971	15	43692886	43699222	creatine kinase, mitochondrial 1A [Source:HGNC Symbol;Acc:HGNC:31736]
ENSG00000162377	COA7	1.16713	0.00203283	0.0326396	1	52684451	52698366	cytochrome c oxidase assembly factor 7 (putative) [Source:HGNC Symbol;Acc:HGNC:25716]
ENSG00000099284	H2AFY2	1.16712	6.60608e-05	0.00239863	10	70052796	70112280	H2A histone family member Y2 [Source:HGNC Symbol;Acc:HGNC:14453]
ENSG00000134802	SLC43A3	1.16664	0.000654793	0.0143814	11	57406954	57427580	solute carrier family 43 member 3 [Source:HGNC Symbol;Acc:HGNC:17466]
ENSG00000198042	MAK16	1.15985	0.00221252	0.0346822	8	33484750	33501260	MAK16 homolog [Source:HGNC Symbol;Acc:HGNC:13703]
ENSG00000180921	FAM83H	1.15963	0.000932576	0.0187285	8	143723933	143733801	family with sequence similarity 83 member H [Source:HGNC Symbol;Acc:HGNC:24797]
ENSG00000173530	TNFRSF10D	1.15877	4.29446e-05	0.00168536	8	23135588	23164030	TNF receptor superfamily member 10d [Source:HGNC Symbol;Acc:HGNC:11907]
ENSG00000277586	NEFL	1.1545	0.00161028	0.0279507	8	24950955	24957110	neurofilament light [Source:HGNC Symbol;Acc:HGNC:7739]
ENSG00000101361	NOP56	1.14896	2.14629e-05	0.000961003	20	2652145	2658393	NOP56 ribonucleoprotein [Source:HGNC Symbol;Acc:HGNC:15911]
ENSG00000104365	IKBKB	1.13609	0.000233212	0.00670731	8	42271302	42332653	inhibitor of nuclear factor kappa B kinase subunit beta [Source:HGNC Symbol;Acc:HGNC:5960]
ENSG00000175691	ZNF77	1.13511	0.00106006	0.0207411	19	2933218	2944971	zinc finger protein 77 [Source:HGNC Symbol;Acc:HGNC:13150]
ENSG00000120913	PDLIM2	1.13113	0.000455294	0.0109654	8	22578279	22598025	PDZ and LIM domain 2 [Source:HGNC Symbol;Acc:HGNC:13992]
ENSG00000010295	IFFO1	1.129	0.00368474	0.0499374	12	6538375	6556083	intermediate filament family orphan 1 [Source:HGNC Symbol;Acc:HGNC:24970]
ENSG00000261488	RP11-757F18.5	1.12639	0.000371266	0.00940142	3	112133423	112135359
ENSG00000187800	PEAR1	1.12176	2.40324e-05	0.00104517	1	156893698	156916434	platelet endothelial aggregation receptor 1 [Source:HGNC Symbol;Acc:HGNC:33631]
ENSG00000124120	TTPAL	1.12049	0.00185866	0.0309049	20	44475886	44494603	alpha tocopherol transfer protein like [Source:HGNC Symbol;Acc:HGNC:16114]
ENSG00000124104	SNX21	1.11601	4.49726e-05	0.00175945	20	45833810	45843275	sorting nexin family member 21 [Source:HGNC Symbol;Acc:HGNC:16154]
ENSG00000164674	SYTL3	1.11125	0.00046131	0.0109963	6	158650014	158764876	synaptotagmin like 3 [Source:HGNC Symbol;Acc:HGNC:15587]
ENSG00000162650	ATXN7L2	1.1083	9.41882e-05	0.0032384	1	109483479	109492804	ataxin 7 like 2 [Source:HGNC Symbol;Acc:HGNC:28713]
ENSG00000241288	RP11-379B18.5	1.10719	0.00134886	0.02456	3	125827238	125916384
ENSG00000137574	TGS1	1.10681	0.000323745	0.00846038	8	55773142	55825448	trimethylguanosine synthase 1 [Source:HGNC Symbol;Acc:HGNC:17843]
ENSG00000229526	KRT16P4	1.10641	0.00244339	0.0374318	17	18450244	18475920	keratin 16 pseudogene 4 [Source:HGNC Symbol;Acc:HGNC:37809]
ENSG00000147789	ZNF7	1.10397	0.000475898	0.0112553	8	144827464	144847509	zinc finger protein 7 [Source:HGNC Symbol;Acc:HGNC:13139]
ENSG00000147687	TATDN1	1.09955	0.00300179	0.0432931	8	124488485	124539458	TatD DNase domain containing 1 [Source:HGNC Symbol;Acc:HGNC:24220]
ENSG00000236287	ZBED5	1.09655	0.00262426	0.039316	11	10812074	10858796	zinc finger BED-type containing 5 [Source:HGNC Symbol;Acc:HGNC:30803]
ENSG00000175592	FOSL1	1.09494	0.00329955	0.0464317	11	65892049	65900573	FOS like 1, AP-1 transcription factor subunit [Source:HGNC Symbol;Acc:HGNC:13718]
ENSG00000163463	KRTCAP2	1.09407	0.00124657	0.0232784	1	155169408	155173475	keratinocyte associated protein 2 [Source:HGNC Symbol;Acc:HGNC:28942]
ENSG00000228782	MRPL45P2	1.08944	0.0010755	0.0209166	17	47450568	47492492	mitochondrial ribosomal protein L45 pseudogene 2 [Source:HGNC Symbol;Acc:HGNC:29716]
ENSG00000126226	PCID2	1.08794	0.000580328	0.0131263	13	113177539	113208715	PCI domain containing 2 [Source:HGNC Symbol;Acc:HGNC:25653]
ENSG00000214860	EVPLL	1.08762	0.00199502	0.0322956	17	18377662	18389647	envoplakin like [Source:HGNC Symbol;Acc:HGNC:35236]
ENSG00000189433	GJB4	1.0799	0.00217787	0.0342976	1	34759741	34763724	gap junction protein beta 4 [Source:HGNC Symbol;Acc:HGNC:4286]
ENSG00000197261	C6orf141	1.07845	0.00063542	0.0140815	6	49550646	49561907	chromosome 6 open reading frame 141 [Source:HGNC Symbol;Acc:HGNC:21351]
ENSG00000169609	C15orf40	1.06038	2.24886e-05	0.000994166	15	82988441	83011641	chromosome 15 open reading frame 40 [Source:HGNC Symbol;Acc:HGNC:28443]
ENSG00000165046	LETM2	1.0571	0.00283764	0.0416575	8	38386207	38409527	leucine zipper and EF-hand containing transmembrane protein 2 [Source:HGNC Symbol;Acc:HGNC:14648]
ENSG00000164011	ZNF691	1.05263	0.00166214	0.0285243	1	42846573	42852477	zinc finger protein 691 [Source:HGNC Symbol;Acc:HGNC:28028]
ENSG00000126003	PLAGL2	1.04966	0.00267611	0.0398806	20	32192503	32207791	PLAG1 like zinc finger 2 [Source:HGNC Symbol;Acc:HGNC:9047]
ENSG00000104870	FCGRT	1.04887	0.00189802	0.0313459	19	49506816	49526333	Fc fragment of IgG receptor and transporter [Source:HGNC Symbol;Acc:HGNC:3621]
ENSG00000185304	RGPD2	1.04751	0.000121026	0.00397075	2	87755955	87825952	RANBP2-like and GRIP domain containing 2 [Source:HGNC Symbol;Acc:HGNC:32415]
ENSG00000188522	FAM83G	1.04654	0.000215198	0.00629958	17	18968789	19004804	family with sequence similarity 83 member G [Source:HGNC Symbol;Acc:HGNC:32554]
ENSG00000143344	RGL1	1.04379	0.00133697	0.0243885	1	183636085	183928531	ral guanine nucleotide dissociation stimulator like 1 [Source:HGNC Symbol;Acc:HGNC:30281]
ENSG00000105708	ZNF14	1.04123	0.00240753	0.0370263	19	19710471	19733097	zinc finger protein 14 [Source:HGNC Symbol;Acc:HGNC:12924]
ENSG00000123364	HOXC13	1.04118	0.00113414	0.0216929	12	53938765	53946544	homeobox C13 [Source:HGNC Symbol;Acc:HGNC:5125]
ENSG00000178163	ZNF518B	1.03556	0.000127667	0.00415227	4	10439874	10457410	zinc finger protein 518B [Source:HGNC Symbol;Acc:HGNC:29365]
ENSG00000124224	PPP4R1L	1.0355	5.64522e-06	0.000307228	20	58228940	58309439	protein phosphatase 4 regulatory subunit 1 like (pseudogene) [Source:HGNC Symbol;Acc:HGNC:15755]
ENSG00000259098	RP11-603B24.2	1.03528	0.000258032	0.00722623	15	22258138	22258848
ENSG00000139289	PHLDA1	1.03367	0.000822777	0.0170627	12	76025447	76033932	pleckstrin homology like domain family A member 1 [Source:HGNC Symbol;Acc:HGNC:8933]
ENSG00000049246	PER3	1.03318	0.000513417	0.011898	1	7784320	7845177	period circadian clock 3 [Source:HGNC Symbol;Acc:HGNC:8847]
ENSG00000177082	WDR73	1.02796	0.000415431	0.0103208	15	84639281	84654343	WD repeat domain 73 [Source:HGNC Symbol;Acc:HGNC:25928]
ENSG00000184402	SS18L1	1.02477	0.000766882	0.016176	20	62143795	62182484	SS18L1, nBAF chromatin remodeling complex subunit [Source:HGNC Symbol;Acc:HGNC:15592]
ENSG00000131196	NFATC1	1.02426	0.00013496	0.00433158	18	79395856	79529325	nuclear factor of activated T-cells 1 [Source:HGNC Symbol;Acc:HGNC:7775]
ENSG00000231948	HS1BP3-IT1	1.02374	0.00193327	0.031666	2	20590775	20592548	HS1BP3 intronic transcript 1 [Source:HGNC Symbol;Acc:HGNC:41474]
ENSG00000131873	CHSY1	1.02176	5.94212e-08	5.85328e-06	15	101175723	101251932	chondroitin sulfate synthase 1 [Source:HGNC Symbol;Acc:HGNC:17198]
ENSG00000213859	KCTD11	1.01992	0.000323797	0.00846038	17	7351889	7354944	potassium channel tetramerization domain containing 11 [Source:HGNC Symbol;Acc:HGNC:21302]
ENSG00000109063	MYH3	1.01902	0.00123869	0.0231751	17	10628526	10657309	myosin heavy chain 3 [Source:HGNC Symbol;Acc:HGNC:7573]
ENSG00000181873	IBA57	1.01799	3.30531e-06	0.000193804	1	228165815	228182257	IBA57 homolog, iron-sulfur cluster assembly [Source:HGNC Symbol;Acc:HGNC:27302]
ENSG00000102786	INTS6	1.00802	6.49391e-08	6.33349e-06	13	51354077	51454264	integrator complex subunit 6 [Source:HGNC Symbol;Acc:HGNC:14879]
ENSG00000189410	SH2D5	1.00623	0.00285896	0.0418769	1	20719732	20732837	SH2 domain containing 5 [Source:HGNC Symbol;Acc:HGNC:28819]
ENSG00000087494	PTHLH	1.00126	0.00310583	0.0445004	12	27958084	27972705	parathyroid hormone like hormone [Source:HGNC Symbol;Acc:HGNC:9607]
ENSG00000147689	FAM83A	1.00081	0.00062241	0.0139501	8	123178960	123210079	family with sequence similarity 83 member A [Source:HGNC Symbol;Acc:HGNC:28210]

## Sheet: GefR vs Control SCC10-PDX DOWN
Supplementary Table S1: Genes with downregulated expression in GefR SCC10-PDX vs Control SCC10-PDX (padj<0.05; FC>2)
ID	Gene Symbol	log2 Fold Change GefR vs Control SCC10-PDX	pvalue GefR vs Control SCC10-PDX	padj GefR vs Control SCC10-PDX	chromosome name	start position	end position	description
ENSG00000009709	PAX7	-9.52427	3.9965e-14	1.3575e-11	1	18631006	18748866	paired box 7 [Source:HGNC Symbol;Acc:HGNC:8621]
ENSG00000197587	DMBX1	-8.77401	1.25845e-12	3.17856e-10	1	46506996	46514226	diencephalon/mesencephalon homeobox 1 [Source:HGNC Symbol;Acc:HGNC:19026]
ENSG00000130224	LRCH2	-8.6589	1.27812e-08	1.43887e-06	X	115110616	115234072	leucine rich repeats and calponin homology domain containing 2 [Source:HGNC Symbol;Acc:HGNC:29292]
ENSG00000142700	DMRTA2	-8.37327	1.51019e-10	2.65646e-08	1	50417550	50423500	DMRT like family A2 [Source:HGNC Symbol;Acc:HGNC:13908]
ENSG00000165626	BEND7	-7.46166	2.04955e-19	1.61512e-16	10	13438484	13528974	BEN domain containing 7 [Source:HGNC Symbol;Acc:HGNC:23514]
ENSG00000127585	FBXL16	-7.38228	2.78838e-37	2.7467e-33	16	692498	705829	F-box and leucine rich repeat protein 16 [Source:HGNC Symbol;Acc:HGNC:14150]
ENSG00000198691	ABCA4	-6.6522	1.98254e-07	1.62155e-05	1	93992835	94121132	ATP binding cassette subfamily A member 4 [Source:HGNC Symbol;Acc:HGNC:34]
ENSG00000198788	MUC2	-6.58029	8.04733e-23	1.05694e-19	11	1074875	1110511	mucin 2, oligomeric mucus/gel-forming [Source:HGNC Symbol;Acc:HGNC:7512]
ENSG00000170085	SIMC1	-6.4581	2.13337e-07	1.72961e-05	5	176238367	176345991	SUMO interacting motifs containing 1 [Source:HGNC Symbol;Acc:HGNC:24779]
ENSG00000146233	CYP39A1	-6.45626	5.2209e-07	3.79546e-05	6	46549580	46652830	cytochrome P450 family 39 subfamily A member 1 [Source:HGNC Symbol;Acc:HGNC:17449]
ENSG00000086289	EPDR1	-6.34615	0.000258269	0.00722623	7	37683843	37951941	ependymin related 1 [Source:HGNC Symbol;Acc:HGNC:17572]
ENSG00000132821	VSTM2L	-6.27282	6.69679e-19	4.88642e-16	20	37903104	37945350	V-set and transmembrane domain containing 2 like [Source:HGNC Symbol;Acc:HGNC:16096]
ENSG00000125848	FLRT3	-6.14955	1.03399e-34	4.07414e-31	20	14322988	14337616	fibronectin leucine rich transmembrane protein 3 [Source:HGNC Symbol;Acc:HGNC:3762]
ENSG00000118513	MYB	-6.11128	1.08364e-06	7.33635e-05	6	135181315	135219173	MYB proto-oncogene, transcription factor [Source:HGNC Symbol;Acc:HGNC:7545]
ENSG00000168243	GNG4	-6.06944	3.69032e-35	1.81758e-31	1	235547687	235650754	G protein subunit gamma 4 [Source:HGNC Symbol;Acc:HGNC:4407]
ENSG00000165105	RASEF	-6.03492	1.25052e-22	1.53978e-19	9	82979585	83063177	RAS and EF-hand domain containing [Source:HGNC Symbol;Acc:HGNC:26464]
ENSG00000102271	KLHL4	-6.00833	0.000209529	0.00618881	X	87517749	87670050	kelch like family member 4 [Source:HGNC Symbol;Acc:HGNC:6355]
ENSG00000171956	FOXB1	-5.99912	5.00497e-05	0.00191834	15	60004222	60061730	forkhead box B1 [Source:HGNC Symbol;Acc:HGNC:3799]
ENSG00000172005	MAL	-5.96527	8.53822e-14	2.75757e-11	2	95025677	95053996	mal, T-cell differentiation protein [Source:HGNC Symbol;Acc:HGNC:6817]
ENSG00000171016	PYGO1	-5.95197	0.000723705	0.0154471	15	55538890	55588947	pygopus family PHD finger 1 [Source:HGNC Symbol;Acc:HGNC:30256]
ENSG00000237517	DGCR5	-5.85477	2.02911e-06	0.000126505	22	18970514	18994628	DiGeorge syndrome critical region gene 5 (non-protein coding) [Source:HGNC Symbol;Acc:HGNC:16757]
ENSG00000016082	ISL1	-5.81372	9.82377e-12	2.15042e-09	5	51383391	51394738	ISL LIM homeobox 1 [Source:HGNC Symbol;Acc:HGNC:6132]
ENSG00000145113	MUC4	-5.80943	8.9279e-08	8.25768e-06	3	195746765	195812277	mucin 4, cell surface associated [Source:HGNC Symbol;Acc:HGNC:7514]
ENSG00000061337	LZTS1	-5.77759	1.67737e-05	0.000783079	8	20246165	20303963	leucine zipper tumor suppressor 1 [Source:HGNC Symbol;Acc:HGNC:13861]
ENSG00000184305	CCSER1	-5.72031	2.10175e-05	0.000947517	4	90127535	91601913	coiled-coil serine rich protein 1 [Source:HGNC Symbol;Acc:HGNC:29349]
ENSG00000266916	ZNF793-AS1	-5.70086	0.00025067	0.00709442	19	37497159	37507046	ZNF793 antisense RNA 1 (head to head) [Source:HGNC Symbol;Acc:HGNC:51303]
ENSG00000167244	IGF2	-5.60786	8.56278e-18	4.55933e-15	11	2129112	2141238	insulin like growth factor 2 [Source:HGNC Symbol;Acc:HGNC:5466]
ENSG00000081052	COL4A4	-5.57834	0.000189348	0.00573017	2	227002711	227164113	collagen type IV alpha 4 chain [Source:HGNC Symbol;Acc:HGNC:2206]
ENSG00000184564	SLITRK6	-5.42127	1.76122e-06	0.000111928	13	85792790	85799488	SLIT and NTRK like family member 6 [Source:HGNC Symbol;Acc:HGNC:23503]
ENSG00000146530	VWDE	-5.38503	2.42723e-05	0.00104866	7	12330885	12403941	von Willebrand factor D and EGF domains [Source:HGNC Symbol;Acc:HGNC:21897]
ENSG00000156218	ADAMTSL3	-5.37687	6.67893e-08	6.45008e-06	15	83654086	84039842	ADAMTS like 3 [Source:HGNC Symbol;Acc:HGNC:14633]
ENSG00000188089	PLA2G4E	-5.33484	0.000298909	0.00805581	15	41981582	42051190	phospholipase A2 group IVE [Source:HGNC Symbol;Acc:HGNC:24791]
ENSG00000138061	CYP1B1	-5.26245	1.07212e-13	3.40675e-11	2	38066973	38109902	cytochrome P450 family 1 subfamily B member 1 [Source:HGNC Symbol;Acc:HGNC:2597]
ENSG00000151491	EPS8	-5.24561	1.09156e-25	1.65422e-22	12	15620158	15882329	epidermal growth factor receptor pathway substrate 8 [Source:HGNC Symbol;Acc:HGNC:3420]
ENSG00000130720	FIBCD1	-5.19976	1.24776e-13	3.90194e-11	9	130902438	130939286	fibrinogen C domain containing 1 [Source:HGNC Symbol;Acc:HGNC:25922]
ENSG00000135903	PAX3	-5.15764	1.71496e-08	1.88106e-06	2	222199888	222298996	paired box 3 [Source:HGNC Symbol;Acc:HGNC:8617]
ENSG00000184012	TMPRSS2	-5.14697	3.19847e-05	0.00130464	21	41464551	41531116	transmembrane protease, serine 2 [Source:HGNC Symbol;Acc:HGNC:11876]
ENSG00000129910	CDH15	-5.11915	0.000693722	0.0150014	16	89171767	89195492	cadherin 15 [Source:HGNC Symbol;Acc:HGNC:1754]
ENSG00000141449	GREB1L	-5.08589	6.2999e-05	0.00233297	18	21242242	21525417	growth regulation by estrogen in breast cancer 1 like [Source:HGNC Symbol;Acc:HGNC:31042]
ENSG00000142875	PRKACB	-5.0691	1.15502e-21	1.19763e-18	1	84078062	84238498	protein kinase cAMP-activated catalytic subunit beta [Source:HGNC Symbol;Acc:HGNC:9381]
ENSG00000153291	SLC25A27	-5.05455	5.49157e-16	2.35194e-13	6	46652915	46678193	solute carrier family 25 member 27 [Source:HGNC Symbol;Acc:HGNC:21065]
ENSG00000106688	SLC1A1	-5.04758	9.87578e-05	0.00335453	9	4490444	4587469	solute carrier family 1 member 1 [Source:HGNC Symbol;Acc:HGNC:10939]
ENSG00000188227	ZNF793	-5.03327	1.22943e-09	1.78095e-07	19	37506939	37548762	zinc finger protein 793 [Source:HGNC Symbol;Acc:HGNC:33115]
ENSG00000222033	LINC01124	-4.88506	0.000770333	0.016214	2	170712451	170714567	long intergenic non-protein coding RNA 1124 [Source:HGNC Symbol;Acc:HGNC:49270]
ENSG00000174640	SLCO2A1	-4.85484	2.69212e-06	0.0001617	3	133932696	134052184	solute carrier organic anion transporter family member 2A1 [Source:HGNC Symbol;Acc:HGNC:10955]
ENSG00000247809	NR2F2-AS1	-4.83747	0.00151794	0.0266947	15	96110040	96327361	NR2F2 antisense RNA 1 [Source:HGNC Symbol;Acc:HGNC:44222]
ENSG00000196724	ZNF418	-4.82807	4.68172e-06	0.000264282	19	57921884	57935393	zinc finger protein 418 [Source:HGNC Symbol;Acc:HGNC:20647]
ENSG00000105696	TMEM59L	-4.80621	1.75531e-06	0.000111914	19	18607430	18621039	transmembrane protein 59 like [Source:HGNC Symbol;Acc:HGNC:13237]
ENSG00000112246	SIM1	-4.79187	0.000238217	0.00678197	6	100385015	100464929	single-minded family bHLH transcription factor 1 [Source:HGNC Symbol;Acc:HGNC:10882]
ENSG00000163082	SGPP2	-4.78261	0.00161714	0.0280452	2	222424517	222560948	sphingosine-1-phosphate phosphatase 2 [Source:HGNC Symbol;Acc:HGNC:19953]
ENSG00000277632	CCL3	-4.75403	0.00171291	0.029268	17	36088256	36090169	C-C motif chemokine ligand 3 [Source:HGNC Symbol;Acc:HGNC:10627]
ENSG00000171124	FUT3	-4.70753	0.000329046	0.00852965	19	5842888	5851474	fucosyltransferase 3 (Lewis blood group) [Source:HGNC Symbol;Acc:HGNC:4014]
ENSG00000180113	TDRD6	-4.69676	0.00125465	0.0233188	6	46687875	46704319	tudor domain containing 6 [Source:HGNC Symbol;Acc:HGNC:21339]
ENSG00000163888	CAMK2N2	-4.68282	5.86152e-08	5.8029e-06	3	184259213	184261463	calcium/calmodulin dependent protein kinase II inhibitor 2 [Source:HGNC Symbol;Acc:HGNC:24197]
ENSG00000204186	ZDBF2	-4.67012	5.17003e-30	1.01855e-26	2	206274663	206314428	zinc finger DBF-type containing 2 [Source:HGNC Symbol;Acc:HGNC:29313]
ENSG00000153093	ACOXL	-4.61239	3.04116e-10	5.16498e-08	2	110732573	111118222	acyl-CoA oxidase-like [Source:HGNC Symbol;Acc:HGNC:25621]
ENSG00000183072	NKX2-5	-4.60755	0.000288123	0.00789474	5	173232109	173235357	NK2 homeobox 5 [Source:HGNC Symbol;Acc:HGNC:2488]
ENSG00000146674	IGFBP3	-4.58388	1.05809e-10	1.94817e-08	7	45912245	45921874	insulin like growth factor binding protein 3 [Source:HGNC Symbol;Acc:HGNC:5472]
ENSG00000103489	XYLT1	-4.573	2.3023e-22	2.6681e-19	16	17101769	17470881	xylosyltransferase 1 [Source:HGNC Symbol;Acc:HGNC:15516]
ENSG00000143556	S100A7	-4.54202	0.000658215	0.0144215	1	153457744	153460701	S100 calcium binding protein A7 [Source:HGNC Symbol;Acc:HGNC:10497]
ENSG00000204335	SP5	-4.50458	4.88104e-05	0.00188552	2	170715351	170718078	Sp5 transcription factor [Source:HGNC Symbol;Acc:HGNC:14529]
ENSG00000248693	LINC02100	-4.49977	0.00329719	0.0464317	5	18704433	18746173	long intergenic non-protein coding RNA 2100 [Source:HGNC Symbol;Acc:HGNC:52955]
ENSG00000261888	AC144831.1	-4.49274	0.000537806	0.0123345	17	83104255	83106910
ENSG00000136944	LMX1B	-4.47748	0.00055441	0.0126857	9	126614443	126701032	LIM homeobox transcription factor 1 beta [Source:HGNC Symbol;Acc:HGNC:6654]
ENSG00000279673	RP11-185E8.2	-4.47302	0.00106936	0.0208796	3	171460612	171462256
ENSG00000255310	AF131215.2	-4.46234	1.54154e-07	1.32619e-05	8	11107788	11109726
ENSG00000173890	GPR160	-4.44679	0.00235153	0.0363068	3	170037929	170085403	G protein-coupled receptor 160 [Source:HGNC Symbol;Acc:HGNC:23693]
ENSG00000138311	ZNF365	-4.43396	1.09755e-15	4.60059e-13	10	62374192	62672011	zinc finger protein 365 [Source:HGNC Symbol;Acc:HGNC:18194]
ENSG00000205269	TMEM170B	-4.4206	8.06716e-07	5.59617e-05	6	11538278	11583524	transmembrane protein 170B [Source:HGNC Symbol;Acc:HGNC:34244]
ENSG00000269918	AF131215.9	-4.40876	0.00190412	0.0314181	8	11104691	11106704
ENSG00000234460	XXyac-YM21GA2.4	-4.39411	0.00193522	0.031666	9	87864166	87866290
ENSG00000105929	ATP6V0A4	-4.38728	0.0017405	0.0295091	7	138706295	138799560	ATPase H+ transporting V0 subunit a4 [Source:HGNC Symbol;Acc:HGNC:866]
ENSG00000280027	RP11-44F14.10	-4.38458	0.00232223	0.0359672	16	53391089	53392473
ENSG00000122691	TWIST1	-4.36449	0.000824358	0.0170775	7	19020991	19117672	twist family bHLH transcription factor 1 [Source:HGNC Symbol;Acc:HGNC:12428]
ENSG00000171044	XKR6	-4.33742	6.27095e-10	9.88352e-08	8	10896045	11201366	XK related 6 [Source:HGNC Symbol;Acc:HGNC:27806]
ENSG00000133561	GIMAP6	-4.32798	4.17146e-05	0.00165024	7	150625375	150632648	GTPase, IMAP family member 6 [Source:HGNC Symbol;Acc:HGNC:21918]
ENSG00000267280	TBX2-AS1	-4.28334	0.00173839	0.0294987	17	61393456	61411555	TBX2 antisense RNA 1 [Source:HGNC Symbol;Acc:HGNC:50355]
ENSG00000268104	SLC6A14	-4.26141	0.00292637	0.0424539	X	116436622	116461458	solute carrier family 6 member 14 [Source:HGNC Symbol;Acc:HGNC:11047]
ENSG00000279117	CTD-2562J17.6	-4.25941	0.000128773	0.00417262	11	75260129	75262466
ENSG00000152078	TMEM56	-4.25656	0.00102201	0.0201853	1	95117338	95197607	transmembrane protein 56 [Source:HGNC Symbol;Acc:HGNC:26477]
ENSG00000148346	LCN2	-4.24774	4.38023e-06	0.00025013	9	128149071	128153455	lipocalin 2 [Source:HGNC Symbol;Acc:HGNC:6526]
ENSG00000099869	IGF2-AS	-4.23799	0.00198043	0.0320859	11	2140501	2148666	IGF2 antisense RNA [Source:HGNC Symbol;Acc:HGNC:14062]
ENSG00000203805	PLPP4	-4.23217	1.16901e-06	7.86031e-05	10	120456954	120589855	phospholipid phosphatase 4 [Source:HGNC Symbol;Acc:HGNC:23531]
ENSG00000167191	GPRC5B	-4.22859	1.30635e-14	4.85593e-12	16	19856691	19886167	G protein-coupled receptor class C group 5 member B [Source:HGNC Symbol;Acc:HGNC:13308]
ENSG00000112379	ARFGEF3	-4.21928	3.11915e-12	7.40367e-10	6	138161921	138344663	ARFGEF family member 3 [Source:HGNC Symbol;Acc:HGNC:21213]
ENSG00000006016	CRLF1	-4.20305	4.81767e-37	3.16377e-33	19	18572220	18607741	cytokine receptor like factor 1 [Source:HGNC Symbol;Acc:HGNC:2364]
ENSG00000111962	UST	-4.18738	5.96283e-17	3.00323e-14	6	148747328	149076990	uronyl 2-sulfotransferase [Source:HGNC Symbol;Acc:HGNC:17223]
ENSG00000241794	SPRR2A	-4.17997	2.37601e-05	0.00103987	1	153056113	153057537	small proline rich protein 2A [Source:HGNC Symbol;Acc:HGNC:11261]
ENSG00000271576	RP11-486G15.2	-4.11527	0.0031218	0.0446265	1	84076331	84077931
ENSG00000099617	EFNA2	-4.10408	0.00129809	0.023923	19	1286154	1300237	ephrin A2 [Source:HGNC Symbol;Acc:HGNC:3222]
ENSG00000170961	HAS2	-4.07686	3.29762e-09	4.29238e-07	8	121612116	121641390	hyaluronan synthase 2 [Source:HGNC Symbol;Acc:HGNC:4819]
ENSG00000121068	TBX2	-4.02176	1.72788e-09	2.44899e-07	17	61399896	61409466	T-box 2 [Source:HGNC Symbol;Acc:HGNC:11597]
ENSG00000137941	TTLL7	-4.01834	2.40215e-05	0.00104517	1	83865028	83999150	tubulin tyrosine ligase like 7 [Source:HGNC Symbol;Acc:HGNC:26242]
ENSG00000091656	ZFHX4	-4.01297	1.3393e-07	1.17793e-05	8	76681219	76867285	zinc finger homeobox 4 [Source:HGNC Symbol;Acc:HGNC:30939]
ENSG00000154342	WNT3A	-4.00382	2.57613e-10	4.45197e-08	1	228007051	228061260	Wnt family member 3A [Source:HGNC Symbol;Acc:HGNC:15983]
ENSG00000104219	ZDHHC2	-3.99533	1.31566e-17	6.82098e-15	8	17156029	17224799	zinc finger DHHC-type containing 2 [Source:HGNC Symbol;Acc:HGNC:18469]
ENSG00000111860	CEP85L	-3.99228	2.21233e-20	1.81605e-17	6	118460772	118710075	centrosomal protein 85 like [Source:HGNC Symbol;Acc:HGNC:21638]
ENSG00000164741	DLC1	-3.98105	9.22966e-05	0.00319567	8	13083361	13604610	DLC1 Rho GTPase activating protein [Source:HGNC Symbol;Acc:HGNC:2897]
ENSG00000009950	MLXIPL	-3.97506	3.63025e-15	1.45958e-12	7	73593194	73624543	MLX interacting protein like [Source:HGNC Symbol;Acc:HGNC:12744]
ENSG00000102362	SYTL4	-3.91833	8.97915e-07	6.1637e-05	X	100674491	100732123	synaptotagmin like 4 [Source:HGNC Symbol;Acc:HGNC:15588]
ENSG00000103647	CORO2B	-3.91756	1.9589e-05	0.000897496	15	68578969	68727806	coronin 2B [Source:HGNC Symbol;Acc:HGNC:2256]
ENSG00000162366	PDZK1IP1	-3.87352	0.000139824	0.00443588	1	47183593	47191044	PDZK1 interacting protein 1 [Source:HGNC Symbol;Acc:HGNC:16887]
ENSG00000206538	VGLL3	-3.85901	1.22299e-09	1.78095e-07	3	86876388	86991119	vestigial like family member 3 [Source:HGNC Symbol;Acc:HGNC:24327]
ENSG00000150551	LYPD1	-3.84887	3.50878e-05	0.00141653	2	132644853	132671579	LY6/PLAUR domain containing 1 [Source:HGNC Symbol;Acc:HGNC:28431]
ENSG00000186642	PDE2A	-3.84015	1.59703e-18	1.04877e-15	11	72576141	72674591	phosphodiesterase 2A [Source:HGNC Symbol;Acc:HGNC:8777]
ENSG00000176842	IRX5	-3.83752	4.71606e-13	1.29043e-10	16	54930862	54934485	iroquois homeobox 5 [Source:HGNC Symbol;Acc:HGNC:14361]
ENSG00000166402	TUB	-3.78928	0.00130691	0.0239945	11	8019244	8106112	tubby bipartite transcription factor [Source:HGNC Symbol;Acc:HGNC:12406]
ENSG00000130513	GDF15	-3.75063	9.69255e-10	1.4781e-07	19	18374731	18389176	growth differentiation factor 15 [Source:HGNC Symbol;Acc:HGNC:30142]
ENSG00000131016	AKAP12	-3.71655	1.53289e-08	1.6966e-06	6	151239999	151358557	A-kinase anchoring protein 12 [Source:HGNC Symbol;Acc:HGNC:370]
ENSG00000120328	PCDHB12	-3.69524	6.06216e-06	0.000327041	5	141208697	141212571	protocadherin beta 12 [Source:HGNC Symbol;Acc:HGNC:8683]
ENSG00000128683	GAD1	-3.67074	2.39934e-10	4.18313e-08	2	170813213	170861151	glutamate decarboxylase 1 [Source:HGNC Symbol;Acc:HGNC:4092]
ENSG00000138193	PLCE1	-3.66683	4.75525e-06	0.000267666	10	94030812	94332823	phospholipase C epsilon 1 [Source:HGNC Symbol;Acc:HGNC:17175]
ENSG00000127863	TNFRSF19	-3.6458	2.82317e-10	4.83646e-08	13	23570370	23676104	TNF receptor superfamily member 19 [Source:HGNC Symbol;Acc:HGNC:11915]
ENSG00000157570	TSPAN18	-3.63469	0.000536718	0.0123338	11	44726465	44932421	tetraspanin 18 [Source:HGNC Symbol;Acc:HGNC:20660]
ENSG00000181143	MUC16	-3.62057	0.00341825	0.0474246	19	8848844	8981342	mucin 16, cell surface associated [Source:HGNC Symbol;Acc:HGNC:15582]
ENSG00000172889	EGFL7	-3.61987	2.18598e-16	1.00153e-13	9	136658856	136672678	EGF like domain multiple 7 [Source:HGNC Symbol;Acc:HGNC:20594]
ENSG00000106078	COBL	-3.60457	5.20722e-06	0.000288979	7	51016212	51316818	cordon-bleu WH2 repeat protein [Source:HGNC Symbol;Acc:HGNC:22199]
ENSG00000043355	ZIC2	-3.5949	1.75439e-08	1.90957e-06	13	99981772	99986773	Zic family member 2 [Source:HGNC Symbol;Acc:HGNC:12873]
ENSG00000116106	EPHA4	-3.58032	1.84848e-16	8.67068e-14	2	221418027	221574202	EPH receptor A4 [Source:HGNC Symbol;Acc:HGNC:3388]
ENSG00000163053	SLC16A14	-3.57845	6.88902e-07	4.89966e-05	2	230034974	230068999	solute carrier family 16 member 14 [Source:HGNC Symbol;Acc:HGNC:26417]
ENSG00000135373	EHF	-3.54411	3.8314e-31	9.4353e-28	11	34621093	34661057	ETS homologous factor [Source:HGNC Symbol;Acc:HGNC:3246]
ENSG00000139865	TTC6	-3.53219	4.91537e-08	4.96604e-06	14	37595847	38041442	tetratricopeptide repeat domain 6 [Source:HGNC Symbol;Acc:HGNC:19739]
ENSG00000179242	CDH4	-3.52785	0.000228435	0.00659882	20	61252426	61940617	cadherin 4 [Source:HGNC Symbol;Acc:HGNC:1763]
ENSG00000120278	PLEKHG1	-3.49946	3.2953e-16	1.47547e-13	6	150599883	150843665	pleckstrin homology and RhoGEF domain containing G1 [Source:HGNC Symbol;Acc:HGNC:20884]
ENSG00000188833	ENTPD8	-3.49271	8.64258e-05	0.00302429	9	137434364	137441816	ectonucleoside triphosphate diphosphohydrolase 8 [Source:HGNC Symbol;Acc:HGNC:24860]
ENSG00000183742	MACC1	-3.47842	1.01617e-07	9.22558e-06	7	20134655	20217404	MACC1, MET transcriptional regulator [Source:HGNC Symbol;Acc:HGNC:30215]
ENSG00000153993	SEMA3D	-3.47309	5.51101e-07	3.97701e-05	7	84995553	85186855	semaphorin 3D [Source:HGNC Symbol;Acc:HGNC:10726]
ENSG00000154310	TNIK	-3.44965	4.63093e-06	0.000262166	3	171061339	171460408	TRAF2 and NCK interacting kinase [Source:HGNC Symbol;Acc:HGNC:30765]
ENSG00000244300	GATA2-AS1	-3.40992	1.33021e-07	1.17518e-05	3	128489212	128502348	GATA2 antisense RNA 1 [Source:HGNC Symbol;Acc:HGNC:51108]
ENSG00000064655	EYA2	-3.40402	1.79375e-07	1.49367e-05	20	46894624	47188844	EYA transcriptional coactivator and phosphatase 2 [Source:HGNC Symbol;Acc:HGNC:3520]
ENSG00000145284	SCD5	-3.38276	6.64271e-07	4.75884e-05	4	82629539	82798857	stearoyl-CoA desaturase 5 [Source:HGNC Symbol;Acc:HGNC:21088]
ENSG00000182010	RTKN2	-3.38116	9.8988e-17	4.75649e-14	10	62183035	62268707	rhotekin 2 [Source:HGNC Symbol;Acc:HGNC:19364]
ENSG00000163898	LIPH	-3.37845	1.84872e-06	0.000116736	3	185506262	185552613	lipase H [Source:HGNC Symbol;Acc:HGNC:18483]
ENSG00000135643	KCNMB4	-3.36883	2.01556e-05	0.00091918	12	70366276	70434292	potassium calcium-activated channel subfamily M regulatory beta subunit 4 [Source:HGNC Symbol;Acc:HGNC:6289]
ENSG00000175315	CST6	-3.35489	1.43569e-13	4.41945e-11	11	66011841	66013505	cystatin E/M [Source:HGNC Symbol;Acc:HGNC:2478]
ENSG00000123143	PKN1	-3.32502	5.51168e-21	5.17075e-18	19	14433053	14471867	protein kinase N1 [Source:HGNC Symbol;Acc:HGNC:9405]
ENSG00000185630	PBX1	-3.32273	5.52446e-10	8.77721e-08	1	164555584	164899296	PBX homeobox 1 [Source:HGNC Symbol;Acc:HGNC:8632]
ENSG00000130881	LRP3	-3.30109	4.60933e-07	3.45279e-05	19	33177603	33208867	LDL receptor related protein 3 [Source:HGNC Symbol;Acc:HGNC:6695]
ENSG00000162981	FAM84A	-3.29615	1.77721e-07	1.4899e-05	2	14632686	14650814	family with sequence similarity 84 member A [Source:HGNC Symbol;Acc:HGNC:20743]
ENSG00000008513	ST3GAL1	-3.29598	4.97807e-09	6.21888e-07	8	133454848	133571940	ST3 beta-galactoside alpha-2,3-sialyltransferase 1 [Source:HGNC Symbol;Acc:HGNC:10862]
ENSG00000250305	KIAA1456	-3.2852	1.86513e-06	0.000117396	8	12945642	13031503	KIAA1456 [Source:HGNC Symbol;Acc:HGNC:26725]
ENSG00000197249	SERPINA1	-3.27961	0.000518177	0.0119819	14	94376747	94390693	serpin family A member 1 [Source:HGNC Symbol;Acc:HGNC:8941]
ENSG00000233834	AC005083.1	-3.27538	4.77383e-06	0.000267947	7	20217577	20221700
ENSG00000221890	NPTXR	-3.27422	9.48201e-05	0.00324907	22	38818452	38843982	neuronal pentraxin receptor [Source:HGNC Symbol;Acc:HGNC:7954]
ENSG00000132170	PPARG	-3.25346	3.54076e-07	2.70374e-05	3	12287368	12434356	peroxisome proliferator activated receptor gamma [Source:HGNC Symbol;Acc:HGNC:9236]
ENSG00000166446	CDYL2	-3.25196	0.000351473	0.00899269	16	80597906	80804329	chromodomain Y-like 2 [Source:HGNC Symbol;Acc:HGNC:23030]
ENSG00000145147	SLIT2	-3.21823	4.27243e-07	3.22495e-05	4	20253260	20620561	slit guidance ligand 2 [Source:HGNC Symbol;Acc:HGNC:11086]
ENSG00000211448	DIO2	-3.21302	0.000317293	0.00836812	14	80197527	80387757	iodothyronine deiodinase 2 [Source:HGNC Symbol;Acc:HGNC:2884]
ENSG00000183307	CECR6	-3.1772	0.00364063	0.0495675	22	17116299	17121367	cat eye syndrome chromosome region, candidate 6 [Source:HGNC Symbol;Acc:HGNC:1844]
ENSG00000120068	HOXB8	-3.14688	4.87175e-08	4.95609e-06	17	48611377	48614939	homeobox B8 [Source:HGNC Symbol;Acc:HGNC:5119]
ENSG00000221878	PSG7	-3.12971	0.00327983	0.046272	19	42924132	42937178	pregnancy specific beta-1-glycoprotein 7 (gene/pseudogene) [Source:HGNC Symbol;Acc:HGNC:9524]
ENSG00000163064	EN1	-3.12946	1.25103e-08	1.41647e-06	2	118842171	118847678	engrailed homeobox 1 [Source:HGNC Symbol;Acc:HGNC:3342]
ENSG00000205517	RGL3	-3.12557	1.20054e-05	0.000598778	19	11384341	11419342	ral guanine nucleotide dissociation stimulator like 3 [Source:HGNC Symbol;Acc:HGNC:30282]
ENSG00000258657	RP11-104E19.1	-3.11978	0.000104954	0.00354059	14	24595723	24657774
ENSG00000030419	IKZF2	-3.10562	0.00107328	0.0209073	2	212999691	213152427	IKAROS family zinc finger 2 [Source:HGNC Symbol;Acc:HGNC:13177]
ENSG00000072163	LIMS2	-3.10315	1.13896e-05	0.000573877	2	127638381	127681786	LIM zinc finger domain containing 2 [Source:HGNC Symbol;Acc:HGNC:16084]
ENSG00000171303	KCNK3	-3.10004	1.5569e-06	0.000101225	2	26692690	26733420	potassium two pore domain channel subfamily K member 3 [Source:HGNC Symbol;Acc:HGNC:6278]
ENSG00000187764	SEMA4D	-3.09126	6.00865e-12	1.35012e-09	9	89360787	89498130	semaphorin 4D [Source:HGNC Symbol;Acc:HGNC:10732]
ENSG00000198286	CARD11	-3.06696	3.18499e-08	3.3025e-06	7	2906141	3043945	caspase recruitment domain family member 11 [Source:HGNC Symbol;Acc:HGNC:16393]
ENSG00000157110	RBPMS	-3.04869	8.10389e-08	7.63898e-06	8	30384479	30572261	RNA binding protein with multiple splicing [Source:HGNC Symbol;Acc:HGNC:19097]
ENSG00000086548	CEACAM6	-3.04041	1.92415e-07	1.58609e-05	19	41750977	41772208	carcinoembryonic antigen related cell adhesion molecule 6 [Source:HGNC Symbol;Acc:HGNC:1818]
ENSG00000156453	PCDH1	-3.03216	2.24723e-14	7.90585e-12	5	141853111	141879246	protocadherin 1 [Source:HGNC Symbol;Acc:HGNC:8655]
ENSG00000124920	MYRF	-3.03157	0.00118107	0.0224003	11	61752642	61788518	myelin regulatory factor [Source:HGNC Symbol;Acc:HGNC:1181]
ENSG00000102359	SRPX2	-3.02705	2.73589e-09	3.71723e-07	X	100644166	100675788	sushi repeat containing protein, X-linked 2 [Source:HGNC Symbol;Acc:HGNC:30668]
ENSG00000167889	MGAT5B	-3.0146	1.6502e-07	1.40132e-05	17	76868456	76950393	mannosyl (alpha-1,6-)-glycoprotein beta-1,6-N-acetyl-glucosaminyltransferase, isozyme B [Source:HGNC Symbol;Acc:HGNC:24140]
ENSG00000198478	SH3BGRL2	-3.00543	9.75348e-10	1.4781e-07	6	79631283	79703659	SH3 domain binding glutamate rich protein like 2 [Source:HGNC Symbol;Acc:HGNC:15567]
ENSG00000008394	MGST1	-3.00199	1.18111e-05	0.000592087	12	16347142	16609259	microsomal glutathione S-transferase 1 [Source:HGNC Symbol;Acc:HGNC:7061]
ENSG00000152767	FARP1	-2.98698	3.86637e-18	2.30822e-15	13	98142562	98455176	FERM, ARH/RhoGEF and pleckstrin domain protein 1 [Source:HGNC Symbol;Acc:HGNC:3591]
ENSG00000153162	BMP6	-2.96959	4.5039e-10	7.27307e-08	6	7726797	7881422	bone morphogenetic protein 6 [Source:HGNC Symbol;Acc:HGNC:1073]
ENSG00000196159	FAT4	-2.9655	6.27774e-12	1.38964e-09	4	125316399	125492932	FAT atypical cadherin 4 [Source:HGNC Symbol;Acc:HGNC:23109]
ENSG00000141934	PLPP2	-2.9622	1.55845e-30	3.41145e-27	19	281040	291504	phospholipid phosphatase 2 [Source:HGNC Symbol;Acc:HGNC:9230]
ENSG00000179546	HTR1D	-2.9319	3.04833e-11	6.06617e-09	1	23191895	23194729	5-hydroxytryptamine receptor 1D [Source:HGNC Symbol;Acc:HGNC:5289]
ENSG00000197479	PCDHB11	-2.92591	0.000618863	0.0138863	5	141199582	141203779	protocadherin beta 11 [Source:HGNC Symbol;Acc:HGNC:8682]
ENSG00000167487	KLHL26	-2.92426	0.00146877	0.0261157	19	18636965	18671714	kelch like family member 26 [Source:HGNC Symbol;Acc:HGNC:25623]
ENSG00000125355	TMEM255A	-2.85296	0.000364754	0.00926034	X	120258650	120311556	transmembrane protein 255A [Source:HGNC Symbol;Acc:HGNC:26086]
ENSG00000137673	MMP7	-2.84348	0.00208132	0.0332735	11	102520508	102530753	matrix metallopeptidase 7 [Source:HGNC Symbol;Acc:HGNC:7174]
ENSG00000107281	NPDC1	-2.82283	6.09761e-17	3.00323e-14	9	137039470	137046203	neural proliferation, differentiation and control 1 [Source:HGNC Symbol;Acc:HGNC:7899]
ENSG00000269741	CTC-518B2.8	-2.81776	0.000565695	0.012899	19	50996018	51009581
ENSG00000165124	SVEP1	-2.80364	0.00330342	0.046453	9	110365251	110579880	sushi, von Willebrand factor type A, EGF and pentraxin domain containing 1 [Source:HGNC Symbol;Acc:HGNC:15985]
ENSG00000164742	ADCY1	-2.79386	0.00193442	0.031666	7	45574140	45723116	adenylate cyclase 1 [Source:HGNC Symbol;Acc:HGNC:232]
ENSG00000122862	SRGN	-2.79324	7.78049e-06	0.000408756	10	69088106	69104811	serglycin [Source:HGNC Symbol;Acc:HGNC:9361]
ENSG00000095587	TLL2	-2.79082	2.57005e-05	0.00109122	10	96364606	96513918	tolloid like 2 [Source:HGNC Symbol;Acc:HGNC:11844]
ENSG00000185924	RTN4RL1	-2.7824	5.19507e-11	1.01335e-08	17	1934677	2025345	reticulon 4 receptor like 1 [Source:HGNC Symbol;Acc:HGNC:21329]
ENSG00000122778	KIAA1549	-2.754	5.53188e-06	0.000303575	7	138831381	138981318	KIAA1549 [Source:HGNC Symbol;Acc:HGNC:22219]
ENSG00000162645	GBP2	-2.75384	9.98043e-13	2.58716e-10	1	89106132	89150456	guanylate binding protein 2 [Source:HGNC Symbol;Acc:HGNC:4183]
ENSG00000135960	EDAR	-2.75093	0.00010244	0.00346169	2	108894471	108989372	ectodysplasin A receptor [Source:HGNC Symbol;Acc:HGNC:2895]
ENSG00000124191	TOX2	-2.71998	5.57775e-11	1.06687e-08	20	43914864	44069616	TOX high mobility group box family member 2 [Source:HGNC Symbol;Acc:HGNC:16095]
ENSG00000185842	DNAH14	-2.71444	5.42479e-08	5.42507e-06	1	224896262	225399292	dynein axonemal heavy chain 14 [Source:HGNC Symbol;Acc:HGNC:2945]
ENSG00000165072	MAMDC2	-2.70817	0.000115916	0.00383807	9	70043581	70226970	MAM domain containing 2 [Source:HGNC Symbol;Acc:HGNC:23673]
ENSG00000122547	EEPD1	-2.69724	1.3477e-11	2.88599e-09	7	36153149	36301543	endonuclease/exonuclease/phosphatase family domain containing 1 [Source:HGNC Symbol;Acc:HGNC:22223]
ENSG00000120324	PCDHB10	-2.6971	0.000658815	0.0144215	5	141192353	141195642	protocadherin beta 10 [Source:HGNC Symbol;Acc:HGNC:8681]
ENSG00000181444	ZNF467	-2.69166	2.6383e-05	0.001113	7	149764182	149773479	zinc finger protein 467 [Source:HGNC Symbol;Acc:HGNC:23154]
ENSG00000174827	PDZK1	-2.69113	7.54461e-14	2.47727e-11	1	145670852	145708148	PDZ domain containing 1 [Source:HGNC Symbol;Acc:HGNC:8821]
ENSG00000118922	KLF12	-2.66797	1.72633e-07	1.45344e-05	13	73686089	73995056	Kruppel like factor 12 [Source:HGNC Symbol;Acc:HGNC:6346]
ENSG00000164181	ELOVL7	-2.6671	2.49871e-08	2.66832e-06	5	60751791	60844389	ELOVL fatty acid elongase 7 [Source:HGNC Symbol;Acc:HGNC:26292]
ENSG00000146411	SLC2A12	-2.65502	1.64945e-07	1.40132e-05	6	133988697	134052636	solute carrier family 2 member 12 [Source:HGNC Symbol;Acc:HGNC:18067]
ENSG00000159167	STC1	-2.65364	0.00356903	0.0488627	8	23841915	23854807	stanniocalcin 1 [Source:HGNC Symbol;Acc:HGNC:11373]
ENSG00000178401	DNAJC22	-2.63113	4.03e-06	0.000231472	12	49346917	49357546	DnaJ heat shock protein family (Hsp40) member C22 [Source:HGNC Symbol;Acc:HGNC:25802]
ENSG00000164647	STEAP1	-2.61873	8.41427e-11	1.56386e-08	7	90154375	90164829	STEAP family member 1 [Source:HGNC Symbol;Acc:HGNC:11378]
ENSG00000115648	MLPH	-2.61681	0.000146753	0.0046185	2	237485428	237555318	melanophilin [Source:HGNC Symbol;Acc:HGNC:29643]
ENSG00000158186	MRAS	-2.61288	0.00323888	0.045807	3	138347648	138405534	muscle RAS oncogene homolog [Source:HGNC Symbol;Acc:HGNC:7227]
ENSG00000183317	EPHA10	-2.60852	0.00142251	0.0255189	1	37713880	37765133	EPH receptor A10 [Source:HGNC Symbol;Acc:HGNC:19987]
ENSG00000187231	SESTD1	-2.59398	2.04832e-09	2.84182e-07	2	179101692	179264790	SEC14 and spectrin domain containing 1 [Source:HGNC Symbol;Acc:HGNC:18379]
ENSG00000134339	SAA2	-2.56499	0.000354784	0.00906564	11	18239223	18248643	serum amyloid A2 [Source:HGNC Symbol;Acc:HGNC:10514]
ENSG00000116962	NID1	-2.56438	2.48013e-11	5.03723e-09	1	235975830	236065162	nidogen 1 [Source:HGNC Symbol;Acc:HGNC:7821]
ENSG00000165617	DACT1	-2.552	0.00151994	0.0266947	14	58633967	58648321	dishevelled binding antagonist of beta catenin 1 [Source:HGNC Symbol;Acc:HGNC:17748]
ENSG00000100344	PNPLA3	-2.54533	0.000220783	0.00642489	22	43923739	43964488	patatin like phospholipase domain containing 3 [Source:HGNC Symbol;Acc:HGNC:18590]
ENSG00000198624	CCDC69	-2.53585	1.71865e-08	1.88106e-06	5	151181052	151224145	coiled-coil domain containing 69 [Source:HGNC Symbol;Acc:HGNC:24487]
ENSG00000111319	SCNN1A	-2.5274	3.41299e-06	0.000199523	12	6346843	6377730	sodium channel epithelial 1 alpha subunit [Source:HGNC Symbol;Acc:HGNC:10599]
ENSG00000154822	PLCL2	-2.52107	0.000207598	0.00615463	3	16802651	17090594	phospholipase C like 2 [Source:HGNC Symbol;Acc:HGNC:9064]
ENSG00000071909	MYO3B	-2.50825	0.00342254	0.0474507	2	170178145	170655171	myosin IIIB [Source:HGNC Symbol;Acc:HGNC:15576]
ENSG00000176222	ZNF404	-2.50567	0.00338013	0.0472476	19	43872363	43901385	zinc finger protein 404 [Source:HGNC Symbol;Acc:HGNC:19417]
ENSG00000167755	KLK6	-2.4938	7.09423e-06	0.000376721	19	50958631	50969673	kallikrein related peptidase 6 [Source:HGNC Symbol;Acc:HGNC:6367]
ENSG00000144451	SPAG16	-2.49172	1.20492e-10	2.15801e-08	2	213284379	214410501	sperm associated antigen 16 [Source:HGNC Symbol;Acc:HGNC:23225]
ENSG00000237238	BMS1P10	-2.46793	0.000452357	0.0109483	9	63372803	63380011	BMS1, ribosome biogenesis factor pseudogene 10 [Source:HGNC Symbol;Acc:HGNC:49154]
ENSG00000262406	MMP12	-2.46552	0.00142948	0.0256021	11	102862736	102875034	matrix metallopeptidase 12 [Source:HGNC Symbol;Acc:HGNC:7158]
ENSG00000136155	SCEL	-2.46199	5.1514e-07	3.77277e-05	13	77535674	77645263	sciellin [Source:HGNC Symbol;Acc:HGNC:10573]
ENSG00000138735	PDE5A	-2.45957	5.29127e-07	3.83247e-05	4	119494395	119628991	phosphodiesterase 5A [Source:HGNC Symbol;Acc:HGNC:8784]
ENSG00000124664	SPDEF	-2.44976	0.000116619	0.00385488	6	34537802	34556333	SAM pointed domain containing ETS transcription factor [Source:HGNC Symbol;Acc:HGNC:17257]
ENSG00000115604	IL18R1	-2.44786	2.88718e-09	3.89591e-07	2	102311529	102398775	interleukin 18 receptor 1 [Source:HGNC Symbol;Acc:HGNC:5988]
ENSG00000112852	PCDHB2	-2.44458	3.07025e-07	2.41948e-05	5	141094578	141098703	protocadherin beta 2 [Source:HGNC Symbol;Acc:HGNC:8687]
ENSG00000134202	GSTM3	-2.43432	1.64142e-05	0.00076856	1	109733932	109741038	glutathione S-transferase mu 3 [Source:HGNC Symbol;Acc:HGNC:4635]
ENSG00000170412	GPRC5C	-2.4277	3.14417e-08	3.27743e-06	17	74424851	74451653	G protein-coupled receptor class C group 5 member C [Source:HGNC Symbol;Acc:HGNC:13309]
ENSG00000100453	GZMB	-2.40839	0.000298741	0.00805581	14	24630954	24634267	granzyme B [Source:HGNC Symbol;Acc:HGNC:4709]
ENSG00000156345	CDK20	-2.40476	2.49698e-07	1.99972e-05	9	87966441	87974753	cyclin dependent kinase 20 [Source:HGNC Symbol;Acc:HGNC:21420]
ENSG00000066735	KIF26A	-2.39534	0.000295172	0.00804574	14	104138723	104180894	kinesin family member 26A [Source:HGNC Symbol;Acc:HGNC:20226]
ENSG00000164221	CCDC112	-2.38891	2.60903e-09	3.56948e-07	5	115267188	115296831	coiled-coil domain containing 112 [Source:HGNC Symbol;Acc:HGNC:28599]
ENSG00000164125	FAM198B	-2.38352	6.18325e-05	0.00229842	4	158124474	158173318	family with sequence similarity 198 member B [Source:HGNC Symbol;Acc:HGNC:25312]
ENSG00000135074	ADAM19	-2.37761	0.000144737	0.00456235	5	157395534	157575775	ADAM metallopeptidase domain 19 [Source:HGNC Symbol;Acc:HGNC:197]
ENSG00000103544	C16orf62	-2.37395	4.02292e-13	1.11627e-10	16	19555240	19706793	chromosome 16 open reading frame 62 [Source:HGNC Symbol;Acc:HGNC:24641]
ENSG00000272941	RP11-134L10.1	-2.36591	0.000190718	0.0057628	7	135168403	135169547
ENSG00000143850	PLEKHA6	-2.36417	1.01466e-05	0.000517871	1	204218851	204377665	pleckstrin homology domain containing A6 [Source:HGNC Symbol;Acc:HGNC:17053]
ENSG00000160183	TMPRSS3	-2.36401	0.00201289	0.0324783	21	42371890	42396846	transmembrane protease, serine 3 [Source:HGNC Symbol;Acc:HGNC:11877]
ENSG00000164294	GPX8	-2.3507	4.88037e-08	4.95609e-06	5	55160118	55167071	glutathione peroxidase 8 (putative) [Source:HGNC Symbol;Acc:HGNC:33100]
ENSG00000157214	STEAP2	-2.34402	2.95305e-05	0.00121967	7	90167590	90238137	STEAP2 metalloreductase [Source:HGNC Symbol;Acc:HGNC:17885]
ENSG00000171401	KRT13	-2.33719	4.22281e-08	4.33927e-06	17	41500981	41505705	keratin 13 [Source:HGNC Symbol;Acc:HGNC:6415]
ENSG00000100033	PRODH	-2.33713	3.58232e-10	5.98095e-08	22	18912777	18936553	proline dehydrogenase 1 [Source:HGNC Symbol;Acc:HGNC:9453]
ENSG00000153292	ADGRF1	-2.33456	1.3294e-05	0.000649887	6	46997703	47042363	adhesion G protein-coupled receptor F1 [Source:HGNC Symbol;Acc:HGNC:18990]
ENSG00000165591	FAAH2	-2.33354	3.51186e-06	0.000204696	X	57286706	57489196	fatty acid amide hydrolase 2 [Source:HGNC Symbol;Acc:HGNC:26440]
ENSG00000172915	NBEA	-2.32825	3.5734e-06	0.000207057	13	34942287	35673022	neurobeachin [Source:HGNC Symbol;Acc:HGNC:7648]
ENSG00000131459	GFPT2	-2.31046	1.05112e-06	7.16541e-05	5	180300690	180353387	glutamine-fructose-6-phosphate transaminase 2 [Source:HGNC Symbol;Acc:HGNC:4242]
ENSG00000119900	OGFRL1	-2.30231	1.90403e-18	1.21004e-15	6	71288803	71308950	opioid growth factor receptor like 1 [Source:HGNC Symbol;Acc:HGNC:21378]
ENSG00000154451	GBP5	-2.29804	0.000893143	0.0181775	1	89258950	89272804	guanylate binding protein 5 [Source:HGNC Symbol;Acc:HGNC:19895]
ENSG00000187601	MAGEH1	-2.2943	3.84654e-05	0.00153713	X	55452105	55453566	MAGE family member H1 [Source:HGNC Symbol;Acc:HGNC:24092]
ENSG00000112294	ALDH5A1	-2.28896	2.07158e-07	1.68646e-05	6	24494852	24537207	aldehyde dehydrogenase 5 family member A1 [Source:HGNC Symbol;Acc:HGNC:408]
ENSG00000182957	SPATA13	-2.28843	1.47485e-07	1.28e-05	13	23979805	24307074	spermatogenesis associated 13 [Source:HGNC Symbol;Acc:HGNC:23222]
ENSG00000164136	IL15	-2.28422	0.000101077	0.0034274	4	141636599	141733987	interleukin 15 [Source:HGNC Symbol;Acc:HGNC:5977]
ENSG00000124107	SLPI	-2.26912	9.48286e-05	0.00324907	20	45252239	45254564	secretory leukocyte peptidase inhibitor [Source:HGNC Symbol;Acc:HGNC:11092]
ENSG00000137819	PAQR5	-2.26474	1.13414e-12	2.90179e-10	15	69298947	69407780	progestin and adipoQ receptor family member 5 [Source:HGNC Symbol;Acc:HGNC:29645]
ENSG00000074964	ARHGEF10L	-2.26388	2.51527e-08	2.66832e-06	1	17539835	17697874	Rho guanine nucleotide exchange factor 10 like [Source:HGNC Symbol;Acc:HGNC:25540]
ENSG00000139174	PRICKLE1	-2.24787	0.00137244	0.0248534	12	42456757	42590355	prickle planar cell polarity protein 1 [Source:HGNC Symbol;Acc:HGNC:17019]
ENSG00000162654	GBP4	-2.23609	3.13331e-05	0.00128336	1	89181148	89198932	guanylate binding protein 4 [Source:HGNC Symbol;Acc:HGNC:20480]
ENSG00000204991	SPIRE2	-2.22483	1.12832e-08	1.29239e-06	16	89818179	89871319	spire type actin nucleation factor 2 [Source:HGNC Symbol;Acc:HGNC:30623]
ENSG00000103381	CPPED1	-2.22212	0.000121132	0.00397075	16	12659799	12804017	calcineurin like phosphoesterase domain containing 1 [Source:HGNC Symbol;Acc:HGNC:25632]
ENSG00000042317	SPATA7	-2.22185	1.24123e-08	1.4135e-06	14	88384924	88470350	spermatogenesis associated 7 [Source:HGNC Symbol;Acc:HGNC:20423]
ENSG00000213694	S1PR3	-2.22087	0.000643618	0.0141992	9	88991447	89005010	sphingosine-1-phosphate receptor 3 [Source:HGNC Symbol;Acc:HGNC:3167]
ENSG00000143546	S100A8	-2.21603	0.00289595	0.0422615	1	153390032	153391188	S100 calcium binding protein A8 [Source:HGNC Symbol;Acc:HGNC:10498]
ENSG00000105825	TFPI2	-2.21137	2.06941e-08	2.24008e-06	7	93885397	93890991	tissue factor pathway inhibitor 2 [Source:HGNC Symbol;Acc:HGNC:11761]
ENSG00000106123	EPHB6	-2.20707	1.71045e-06	0.000110123	7	142855061	142871094	EPH receptor B6 [Source:HGNC Symbol;Acc:HGNC:3396]
ENSG00000204941	PSG5	-2.19885	0.00252821	0.0382258	19	43166256	43186536	pregnancy specific beta-1-glycoprotein 5 [Source:HGNC Symbol;Acc:HGNC:9522]
ENSG00000140274	DUOXA2	-2.17268	0.00322602	0.0457565	15	45114321	45118421	dual oxidase maturation factor 2 [Source:HGNC Symbol;Acc:HGNC:32698]
ENSG00000176532	PRR15	-2.1726	2.71227e-06	0.000162386	7	29563811	29567295	proline rich 15 [Source:HGNC Symbol;Acc:HGNC:22310]
ENSG00000131773	KHDRBS3	-2.15868	1.1762e-06	7.86797e-05	8	135457457	135656722	KH RNA binding domain containing, signal transduction associated 3 [Source:HGNC Symbol;Acc:HGNC:18117]
ENSG00000188747	NOXA1	-2.15393	5.26276e-06	0.000291241	9	137423350	137434406	NADPH oxidase activator 1 [Source:HGNC Symbol;Acc:HGNC:10668]
ENSG00000177839	PCDHB9	-2.14644	0.00139649	0.0252124	5	141187127	141191541	protocadherin beta 9 [Source:HGNC Symbol;Acc:HGNC:8694]
ENSG00000205683	DPF3	-2.1284	0.000572479	0.0130033	14	72619296	72894116	double PHD fingers 3 [Source:HGNC Symbol;Acc:HGNC:17427]
ENSG00000171105	INSR	-2.12284	7.82458e-07	5.46638e-05	19	7112255	7294034	insulin receptor [Source:HGNC Symbol;Acc:HGNC:6091]
ENSG00000133138	TBC1D8B	-2.1186	1.45967e-10	2.59071e-08	X	106802680	106876145	TBC1 domain family member 8B [Source:HGNC Symbol;Acc:HGNC:24715]
ENSG00000163435	ELF3	-2.11824	0.00234339	0.036238	1	202007945	202017188	E74 like ETS transcription factor 3 [Source:HGNC Symbol;Acc:HGNC:3318]
ENSG00000176485	PLA2G16	-2.11542	2.56279e-06	0.000156314	11	63573195	63616883	phospholipase A2 group XVI [Source:HGNC Symbol;Acc:HGNC:17825]
ENSG00000121895	TMEM156	-2.10974	3.82187e-05	0.00153038	4	38966744	39032922	transmembrane protein 156 [Source:HGNC Symbol;Acc:HGNC:26260]
ENSG00000164342	TLR3	-2.0941	4.66759e-05	0.00182091	4	186069152	186088069	toll like receptor 3 [Source:HGNC Symbol;Acc:HGNC:11849]
ENSG00000102760	RGCC	-2.09005	0.0001434	0.00452743	13	41457559	41470882	regulator of cell cycle [Source:HGNC Symbol;Acc:HGNC:20369]
ENSG00000188487	INSC	-2.0896	0.00140631	0.0253484	11	15112424	15247208	inscuteable homolog (Drosophila) [Source:HGNC Symbol;Acc:HGNC:33116]
ENSG00000173267	SNCG	-2.08884	8.48183e-06	0.000442065	10	86958618	86963260	synuclein gamma [Source:HGNC Symbol;Acc:HGNC:11141]
ENSG00000122694	GLIPR2	-2.07176	1.25444e-06	8.30512e-05	9	36136536	36163913	GLI pathogenesis related 2 [Source:HGNC Symbol;Acc:HGNC:18007]
ENSG00000162975	KCNF1	-2.06521	0.000643104	0.0141992	2	10911937	10914225	potassium voltage-gated channel modifier subfamily F member 1 [Source:HGNC Symbol;Acc:HGNC:6246]
ENSG00000155893	PXYLP1	-2.0646	8.95269e-07	6.1637e-05	3	141228726	141367753	2-phosphoxylose phosphatase 1 [Source:HGNC Symbol;Acc:HGNC:26303]
ENSG00000108691	CCL2	-2.05811	0.000198836	0.00594426	17	34255218	34257203	C-C motif chemokine ligand 2 [Source:HGNC Symbol;Acc:HGNC:10618]
ENSG00000112812	PRSS16	-2.05783	8.2198e-08	7.71134e-06	6	27247701	27256624	protease, serine 16 [Source:HGNC Symbol;Acc:HGNC:9480]
ENSG00000169330	KIAA1024	-2.05685	0.000138991	0.00442369	15	79432516	79472290	KIAA1024 [Source:HGNC Symbol;Acc:HGNC:29172]
ENSG00000151632	AKR1C2	-2.04923	9.63288e-05	0.00328335	10	4987400	5018031	aldo-keto reductase family 1 member C2 [Source:HGNC Symbol;Acc:HGNC:385]
ENSG00000163071	SPATA18	-2.02715	6.25215e-08	6.12804e-06	4	52051331	52097292	spermatogenesis associated 18 [Source:HGNC Symbol;Acc:HGNC:29579]
ENSG00000142621	FHAD1	-2.02685	0.0012492	0.0232834	1	15247272	15400283	forkhead associated phosphopeptide binding domain 1 [Source:HGNC Symbol;Acc:HGNC:29408]
ENSG00000148848	ADAM12	-2.0266	0.00130806	0.0239945	10	126012381	126388455	ADAM metallopeptidase domain 12 [Source:HGNC Symbol;Acc:HGNC:190]
ENSG00000204936	CD177	-2.02596	0.0014404	0.0257742	19	43353659	43363172	CD177 molecule [Source:HGNC Symbol;Acc:HGNC:30072]
ENSG00000111816	FRK	-2.02386	0.000130389	0.00421804	6	115931149	116060758	fyn related Src family tyrosine kinase [Source:HGNC Symbol;Acc:HGNC:3955]
ENSG00000130517	PGPEP1	-2.01932	2.5201e-07	2.01006e-05	19	18340587	18369950	pyroglutamyl-peptidase I [Source:HGNC Symbol;Acc:HGNC:13568]
ENSG00000119865	CNRIP1	-2.01759	0.00229344	0.0356896	2	68284171	68320051	cannabinoid receptor interacting protein 1 [Source:HGNC Symbol;Acc:HGNC:24546]
ENSG00000079215	SLC1A3	-2.01685	5.19482e-07	3.79049e-05	5	36606355	36688334	solute carrier family 1 member 3 [Source:HGNC Symbol;Acc:HGNC:10941]
ENSG00000225526	MKRN2OS	-2.01387	0.000790672	0.0165361	3	12514934	12561059	MKRN2 opposite strand [Source:HGNC Symbol;Acc:HGNC:40375]
ENSG00000233608	TWIST2	-2.00818	0.00133506	0.0243764	2	238848032	238910543	twist family bHLH transcription factor 2 [Source:HGNC Symbol;Acc:HGNC:20670]
ENSG00000165125	TRPV6	-2.00567	0.00307679	0.0441484	7	142871203	142885762	transient receptor potential cation channel subfamily V member 6 [Source:HGNC Symbol;Acc:HGNC:14006]
ENSG00000171385	KCND3	-1.99988	0.000630471	0.0140508	1	111770662	111989155	potassium voltage-gated channel subfamily D member 3 [Source:HGNC Symbol;Acc:HGNC:6239]
ENSG00000181885	CLDN7	-1.99477	0.000417809	0.0103248	17	7259903	7263983	claudin 7 [Source:HGNC Symbol;Acc:HGNC:2049]
ENSG00000112902	SEMA5A	-1.99023	1.43535e-05	0.000693082	5	9035026	9546075	semaphorin 5A [Source:HGNC Symbol;Acc:HGNC:10736]
ENSG00000165507	C10orf10	-1.98953	0.00120733	0.0227561	10	44970981	44978810	chromosome 10 open reading frame 10 [Source:HGNC Symbol;Acc:HGNC:23355]
ENSG00000198959	TGM2	-1.98946	0.0017304	0.0294138	20	38127387	38166578	transglutaminase 2 [Source:HGNC Symbol;Acc:HGNC:11778]
ENSG00000135253	KCP	-1.98912	5.51283e-05	0.00207664	7	128862451	128910719	kielin/chordin-like protein [Source:HGNC Symbol;Acc:HGNC:17585]
ENSG00000179104	TMTC2	-1.98185	2.58251e-13	7.48206e-11	12	82686880	83134870	transmembrane and tetratricopeptide repeat containing 2 [Source:HGNC Symbol;Acc:HGNC:25440]
ENSG00000131711	MAP1B	-1.97993	0.00334843	0.0469518	5	72107234	72209570	microtubule associated protein 1B [Source:HGNC Symbol;Acc:HGNC:6836]
ENSG00000145687	SSBP2	-1.96931	4.84085e-06	0.000270936	5	81413021	81751797	single stranded DNA binding protein 2 [Source:HGNC Symbol;Acc:HGNC:15831]
ENSG00000100302	RASD2	-1.96113	1.77356e-05	0.00082021	22	35540868	35554001	RASD family member 2 [Source:HGNC Symbol;Acc:HGNC:18229]
ENSG00000170835	CEL	-1.95449	0.00174681	0.0295485	9	133061978	133071861	carboxyl ester lipase [Source:HGNC Symbol;Acc:HGNC:1848]
ENSG00000117016	RIMS3	-1.95426	0.00130596	0.0239945	1	40620679	40665657	regulating synaptic membrane exocytosis 3 [Source:HGNC Symbol;Acc:HGNC:21292]
ENSG00000167608	TMC4	-1.94137	6.41391e-07	4.6117e-05	19	54160108	54173250	transmembrane channel like 4 [Source:HGNC Symbol;Acc:HGNC:22998]
ENSG00000120594	PLXDC2	-1.93982	0.00141017	0.0253946	10	19816239	20289856	plexin domain containing 2 [Source:HGNC Symbol;Acc:HGNC:21013]
ENSG00000146859	TMEM140	-1.92987	0.00025566	0.00718511	7	135148072	135166215	transmembrane protein 140 [Source:HGNC Symbol;Acc:HGNC:21870]
ENSG00000243566	UPK3B	-1.92832	0.00297821	0.0430475	7	76510428	76516521	uroplakin 3B [Source:HGNC Symbol;Acc:HGNC:21444]
ENSG00000160255	ITGB2	-1.92448	0.00155629	0.0271395	21	44885953	44931989	integrin subunit beta 2 [Source:HGNC Symbol;Acc:HGNC:6155]
ENSG00000184384	MAML2	-1.91541	2.376e-06	0.00014628	11	95976598	96343180	mastermind like transcriptional coactivator 2 [Source:HGNC Symbol;Acc:HGNC:16259]
ENSG00000122733	PHF24	-1.90941	0.000140861	0.00446157	9	34957608	34982544	PHD finger protein 24 [Source:HGNC Symbol;Acc:HGNC:29180]
ENSG00000003249	DBNDD1	-1.90651	2.60631e-06	0.000158397	16	90004865	90020128	dysbindin domain containing 1 [Source:HGNC Symbol;Acc:HGNC:28455]
ENSG00000065320	NTN1	-1.9064	0.00191972	0.0315434	17	9021542	9244000	netrin 1 [Source:HGNC Symbol;Acc:HGNC:8029]
ENSG00000163032	VSNL1	-1.90547	4.31946e-07	3.248e-05	2	17539126	17657018	visinin like 1 [Source:HGNC Symbol;Acc:HGNC:12722]
ENSG00000155066	PROM2	-1.89112	8.42572e-06	0.000440305	2	95274453	95291308	prominin 2 [Source:HGNC Symbol;Acc:HGNC:20685]
ENSG00000165197	VEGFD	-1.88742	0.00124898	0.0232834	X	15345591	15384376	vascular endothelial growth factor D [Source:HGNC Symbol;Acc:HGNC:3708]
ENSG00000146205	ANO7	-1.88458	0.000149658	0.00468624	2	241188509	241225377	anoctamin 7 [Source:HGNC Symbol;Acc:HGNC:31677]
ENSG00000161682	FAM171A2	-1.88372	0.000107821	0.00361871	17	44353215	44363875	family with sequence similarity 171 member A2 [Source:HGNC Symbol;Acc:HGNC:30480]
ENSG00000197043	ANXA6	-1.88277	1.57463e-05	0.000740376	5	151100712	151157882	annexin A6 [Source:HGNC Symbol;Acc:HGNC:544]
ENSG00000099957	P2RX6	-1.87946	7.95049e-05	0.00281146	22	21009808	21028830	purinergic receptor P2X 6 [Source:HGNC Symbol;Acc:HGNC:8538]
ENSG00000196511	TPK1	-1.87919	6.3287e-05	0.00233362	7	144451941	144836395	thiamin pyrophosphokinase 1 [Source:HGNC Symbol;Acc:HGNC:17358]
ENSG00000171227	TMEM37	-1.87874	9.31831e-05	0.0032207	2	119429901	119438520	transmembrane protein 37 [Source:HGNC Symbol;Acc:HGNC:18216]
ENSG00000033170	FUT8	-1.87668	8.13746e-09	9.71612e-07	14	65410592	65744121	fucosyltransferase 8 [Source:HGNC Symbol;Acc:HGNC:4019]
ENSG00000165169	DYNLT3	-1.86986	6.11087e-05	0.00228445	X	37836757	37847637	dynein light chain Tctex-type 3 [Source:HGNC Symbol;Acc:HGNC:11694]
ENSG00000245694	CRNDE	-1.85797	2.64999e-05	0.00111554	16	54845189	54929189	colorectal neoplasia differentially expressed [Source:HGNC Symbol;Acc:HGNC:37078]
ENSG00000133067	LGR6	-1.85556	0.000127797	0.00415227	1	202193901	202319781	leucine rich repeat containing G protein-coupled receptor 6 [Source:HGNC Symbol;Acc:HGNC:19719]
ENSG00000187372	PCDHB13	-1.85451	0.00248093	0.037801	5	141213919	141218979	protocadherin beta 13 [Source:HGNC Symbol;Acc:HGNC:8684]
ENSG00000124615	MOCS1	-1.8519	0.0027987	0.0412866	6	39899578	39934551	molybdenum cofactor synthesis 1 [Source:HGNC Symbol;Acc:HGNC:7190]
ENSG00000141655	TNFRSF11A	-1.84916	0.000841904	0.0173861	18	62325287	62391292	TNF receptor superfamily member 11a [Source:HGNC Symbol;Acc:HGNC:11908]
ENSG00000149260	CAPN5	-1.84507	0.000201423	0.00599886	11	77066932	77126155	calpain 5 [Source:HGNC Symbol;Acc:HGNC:1482]
ENSG00000141622	RNF165	-1.83485	0.000259208	0.00722768	18	46326809	46463140	ring finger protein 165 [Source:HGNC Symbol;Acc:HGNC:31696]
ENSG00000267534	S1PR2	-1.83023	1.37156e-07	1.20094e-05	19	10221435	10231272	sphingosine-1-phosphate receptor 2 [Source:HGNC Symbol;Acc:HGNC:3169]
ENSG00000274173	RP4-568C11.4	-1.83005	3.00257e-05	0.00123494	20	24931840	24932983
ENSG00000137726	FXYD6	-1.82702	0.00211586	0.0335897	11	117836976	117877486	FXYD domain containing ion transport regulator 6 [Source:HGNC Symbol;Acc:HGNC:4030]
ENSG00000179222	MAGED1	-1.82626	6.92438e-07	4.90709e-05	X	51803007	51902357	MAGE family member D1 [Source:HGNC Symbol;Acc:HGNC:6813]
ENSG00000158856	DMTN	-1.81961	8.43849e-09	9.95758e-07	8	22048995	22082527	dematin actin binding protein [Source:HGNC Symbol;Acc:HGNC:3382]
ENSG00000153982	GDPD1	-1.81909	0.000163505	0.00505684	17	59220467	59275967	glycerophosphodiester phosphodiesterase domain containing 1 [Source:HGNC Symbol;Acc:HGNC:20883]
ENSG00000150054	MPP7	-1.81362	1.33887e-08	1.4987e-06	10	28050993	28334486	membrane palmitoylated protein 7 [Source:HGNC Symbol;Acc:HGNC:26542]
ENSG00000105792	CFAP69	-1.81289	1.0631e-05	0.000538411	7	90245174	90311063	cilia and flagella associated protein 69 [Source:HGNC Symbol;Acc:HGNC:26107]
ENSG00000196139	AKR1C3	-1.81191	0.00011324	0.00376211	10	5035354	5107686	aldo-keto reductase family 1 member C3 [Source:HGNC Symbol;Acc:HGNC:386]
ENSG00000136378	ADAMTS7	-1.80667	0.000787873	0.0165302	15	78759203	78811431	ADAM metallopeptidase with thrombospondin type 1 motif 7 [Source:HGNC Symbol;Acc:HGNC:223]
ENSG00000100196	KDELR3	-1.80597	6.67408e-09	8.11642e-07	22	38468062	38483447	KDEL endoplasmic reticulum protein retention receptor 3 [Source:HGNC Symbol;Acc:HGNC:6306]
ENSG00000164574	GALNT10	-1.80272	1.37982e-08	1.53581e-06	5	154190730	154420984	polypeptide N-acetylgalactosaminyltransferase 10 [Source:HGNC Symbol;Acc:HGNC:19873]
ENSG00000012171	SEMA3B	-1.80162	0.000156314	0.00485733	3	50267558	50277546	semaphorin 3B [Source:HGNC Symbol;Acc:HGNC:10724]
ENSG00000213199	ASIC3	-1.78904	0.000920024	0.0185901	7	151048292	151052756	acid sensing ion channel subunit 3 [Source:HGNC Symbol;Acc:HGNC:101]
ENSG00000117472	TSPAN1	-1.78355	1.26941e-05	0.000626786	1	46175073	46185958	tetraspanin 1 [Source:HGNC Symbol;Acc:HGNC:20657]
ENSG00000138439	FAM117B	-1.77809	1.86254e-05	0.000857333	2	202635188	202769757	family with sequence similarity 117 member B [Source:HGNC Symbol;Acc:HGNC:14440]
ENSG00000274070	GATSL2	-1.76854	0.00174789	0.0295485	7	74964818	75024798	GATS protein like 2 [Source:HGNC Symbol;Acc:HGNC:37073]
ENSG00000138829	FBN2	-1.76336	0.000244933	0.00694999	5	128257909	128659185	fibrillin 2 [Source:HGNC Symbol;Acc:HGNC:3604]
ENSG00000083454	P2RX5	-1.75453	0.000213988	0.00627349	17	3672199	3696404	purinergic receptor P2X 5 [Source:HGNC Symbol;Acc:HGNC:8536]
ENSG00000141933	TPGS1	-1.7465	0.000207747	0.00615463	19	507497	519654	tubulin polyglutamylase complex subunit 1 [Source:HGNC Symbol;Acc:HGNC:25058]
ENSG00000105523	FAM83E	-1.7187	0.000406882	0.0101855	19	48600810	48614854	family with sequence similarity 83 member E [Source:HGNC Symbol;Acc:HGNC:25972]
ENSG00000160190	SLC37A1	-1.71243	0.000137655	0.00439536	21	42496008	42581440	solute carrier family 37 member 1 [Source:HGNC Symbol;Acc:HGNC:11024]
ENSG00000166689	PLEKHA7	-1.7091	0.00042838	0.0104845	11	16777317	17014443	pleckstrin homology domain containing A7 [Source:HGNC Symbol;Acc:HGNC:27049]
ENSG00000079385	CEACAM1	-1.70587	0.000408507	0.0102052	19	42507304	42561234	carcinoembryonic antigen related cell adhesion molecule 1 [Source:HGNC Symbol;Acc:HGNC:1814]
ENSG00000106415	GLCCI1	-1.69087	0.000572908	0.0130033	7	7968794	8094272	glucocorticoid induced 1 [Source:HGNC Symbol;Acc:HGNC:18713]
ENSG00000243137	PSG4	-1.68939	2.56964e-05	0.00109122	19	43192702	43207299	pregnancy specific beta-1-glycoprotein 4 [Source:HGNC Symbol;Acc:HGNC:9521]
ENSG00000106537	TSPAN13	-1.68221	6.37704e-05	0.00234162	7	16753535	16784536	tetraspanin 13 [Source:HGNC Symbol;Acc:HGNC:21643]
ENSG00000164291	ARSK	-1.67465	6.96089e-06	0.000370639	5	95555074	95605064	arylsulfatase family member K [Source:HGNC Symbol;Acc:HGNC:25239]
ENSG00000054690	PLEKHH1	-1.66947	5.00123e-05	0.00191834	14	67533301	67589612	pleckstrin homology, MyTH4 and FERM domain containing H1 [Source:HGNC Symbol;Acc:HGNC:17733]
ENSG00000171346	KRT15	-1.66643	1.31618e-05	0.000646635	17	41513743	41522529	keratin 15 [Source:HGNC Symbol;Acc:HGNC:6421]
ENSG00000230454	U73166.2	-1.65284	0.00323401	0.0457711	3	50260303	50263358
ENSG00000115112	TFCP2L1	-1.65099	5.81784e-05	0.00217903	2	121216587	121285207	transcription factor CP2 like 1 [Source:HGNC Symbol;Acc:HGNC:17925]
ENSG00000163083	INHBB	-1.63729	0.00152301	0.0266947	2	120346143	120351808	inhibin beta B subunit [Source:HGNC Symbol;Acc:HGNC:6067]
ENSG00000106560	GIMAP2	-1.63357	0.000348621	0.00893131	7	150685697	150693641	GTPase, IMAP family member 2 [Source:HGNC Symbol;Acc:HGNC:21789]
ENSG00000175048	ZDHHC14	-1.63326	1.44998e-05	0.000696732	6	157381133	157678146	zinc finger DHHC-type containing 14 [Source:HGNC Symbol;Acc:HGNC:20341]
ENSG00000106780	MEGF9	-1.63282	1.44941e-06	9.48945e-05	9	120600813	120714470	multiple EGF like domains 9 [Source:HGNC Symbol;Acc:HGNC:3234]
ENSG00000109654	TRIM2	-1.63141	0.000408705	0.0102052	4	153152342	153339320	tripartite motif containing 2 [Source:HGNC Symbol;Acc:HGNC:15974]
ENSG00000162461	SLC25A34	-1.63043	0.00291206	0.0423836	1	15736405	15741396	solute carrier family 25 member 34 [Source:HGNC Symbol;Acc:HGNC:27653]
ENSG00000007944	MYLIP	-1.62959	4.26209e-05	0.00168271	6	16129125	16148248	myosin regulatory light chain interacting protein [Source:HGNC Symbol;Acc:HGNC:21155]
ENSG00000105088	OLFM2	-1.6154	0.000491968	0.0115384	19	9853718	9936552	olfactomedin 2 [Source:HGNC Symbol;Acc:HGNC:17189]
ENSG00000253313	C1orf210	-1.60887	0.00119051	0.0225305	1	43281883	43285617	chromosome 1 open reading frame 210 [Source:HGNC Symbol;Acc:HGNC:28755]
ENSG00000143502	SUSD4	-1.60666	0.000525551	0.0121098	1	223220819	223364202	sushi domain containing 4 [Source:HGNC Symbol;Acc:HGNC:25470]
ENSG00000197467	COL13A1	-1.60627	0.00255948	0.0386392	10	69801931	69964275	collagen type XIII alpha 1 chain [Source:HGNC Symbol;Acc:HGNC:2190]
ENSG00000133216	EPHB2	-1.60286	6.09029e-06	0.000327041	1	22710839	22921500	EPH receptor B2 [Source:HGNC Symbol;Acc:HGNC:3393]
ENSG00000107485	GATA3	-1.59997	8.61083e-05	0.00301854	10	8053604	8075198	GATA binding protein 3 [Source:HGNC Symbol;Acc:HGNC:4172]
ENSG00000144647	POMGNT2	-1.59477	7.24314e-08	6.96084e-06	3	43079232	43106076	protein O-linked mannose N-acetylglucosaminyltransferase 2 (beta 1,4-) [Source:HGNC Symbol;Acc:HGNC:25902]
ENSG00000162849	KIF26B	-1.59066	0.00199707	0.0323024	1	245154985	245709431	kinesin family member 26B [Source:HGNC Symbol;Acc:HGNC:25484]
ENSG00000214274	ANG	-1.58528	0.000588379	0.0132779	14	20684177	20698971	angiogenin [Source:HGNC Symbol;Acc:HGNC:483]
ENSG00000156711	MAPK13	-1.57439	5.29358e-11	1.02244e-08	6	36127809	36144524	mitogen-activated protein kinase 13 [Source:HGNC Symbol;Acc:HGNC:6875]
ENSG00000163596	ICA1L	-1.56563	0.000691868	0.0150014	2	202773150	202871985	islet cell autoantigen 1 like [Source:HGNC Symbol;Acc:HGNC:14442]
ENSG00000160233	LRRC3	-1.56134	3.27851e-06	0.000192806	21	44455486	44462196	leucine rich repeat containing 3 [Source:HGNC Symbol;Acc:HGNC:14965]
ENSG00000272674	PCDHB16	-1.5577	0.00200283	0.0323689	5	141181399	141186399	protocadherin beta 16 [Source:HGNC Symbol;Acc:HGNC:14546]
ENSG00000164520	RAET1E	-1.54738	1.73086e-05	0.00080614	6	149883375	149898102	retinoic acid early transcript 1E [Source:HGNC Symbol;Acc:HGNC:16793]
ENSG00000155760	FZD7	-1.54353	0.000222831	0.00646538	2	202034587	202038445	frizzled class receptor 7 [Source:HGNC Symbol;Acc:HGNC:4045]
ENSG00000158055	GRHL3	-1.54078	0.000967245	0.0193067	1	24319322	24364482	grainyhead like transcription factor 3 [Source:HGNC Symbol;Acc:HGNC:25839]
ENSG00000002079	MYH16	-1.5348	0.00343258	0.0474897	7	99238794	99311130	myosin heavy chain 16 pseudogene [Source:HGNC Symbol;Acc:HGNC:31038]
ENSG00000130234	ACE2	-1.53143	1.23555e-05	0.00061197	X	15561033	15602148	angiotensin I converting enzyme 2 [Source:HGNC Symbol;Acc:HGNC:13557]
ENSG00000160345	C9orf116	-1.53045	0.00270455	0.0401577	9	135495181	135501734	chromosome 9 open reading frame 116 [Source:HGNC Symbol;Acc:HGNC:28435]
ENSG00000261578	RP11-21L23.2	-1.52919	0.000109682	0.00365626	11	76800364	76804555
ENSG00000086300	SNX10	-1.52733	6.09229e-06	0.000327041	7	26291895	26374329	sorting nexin 10 [Source:HGNC Symbol;Acc:HGNC:14974]
ENSG00000204789	ZNF204P	-1.52409	5.05946e-07	3.71927e-05	6	27357825	27360221	zinc finger protein 204, pseudogene [Source:HGNC Symbol;Acc:HGNC:12995]
ENSG00000214357	NEURL1B	-1.50941	0.00333854	0.0468465	5	172641266	172691540	neuralized E3 ubiquitin protein ligase 1B [Source:HGNC Symbol;Acc:HGNC:35422]
ENSG00000152782	PANK1	-1.50772	0.0015159	0.0266947	10	89579497	89645572	pantothenate kinase 1 [Source:HGNC Symbol;Acc:HGNC:8598]
ENSG00000241544	LINC02029	-1.50685	0.00264458	0.0395603	3	157081841	157088547	long intergenic non-protein coding RNA 2029 [Source:HGNC Symbol;Acc:HGNC:52863]
ENSG00000164237	CMBL	-1.49534	5.1745e-05	0.00196422	5	10275875	10308026	carboxymethylenebutenolidase homolog [Source:HGNC Symbol;Acc:HGNC:25090]
ENSG00000171604	CXXC5	-1.49244	0.0026655	0.0397826	5	139647299	139683882	CXXC finger protein 5 [Source:HGNC Symbol;Acc:HGNC:26943]
ENSG00000110492	MDK	-1.48935	0.00299025	0.0431732	11	46380756	46383837	midkine (neurite growth-promoting factor 2) [Source:HGNC Symbol;Acc:HGNC:6972]
ENSG00000079150	FKBP7	-1.48801	0.00183737	0.0306549	2	178463664	178478600	FK506 binding protein 7 [Source:HGNC Symbol;Acc:HGNC:3723]
ENSG00000099953	MMP11	-1.48522	0.00256701	0.0386937	22	23768226	23784316	matrix metallopeptidase 11 [Source:HGNC Symbol;Acc:HGNC:7157]
ENSG00000178752	ERFE	-1.48372	0.000566679	0.0129065	2	238158982	238168900	erythroferrone [Source:HGNC Symbol;Acc:HGNC:26727]
ENSG00000233369	GTF2IP4	-1.47456	6.58099e-06	0.000351361	7	73154938	73207283	general transcription factor IIi pseudogene 4 [Source:HGNC Symbol;Acc:HGNC:51716]
ENSG00000165475	CRYL1	-1.47247	5.38044e-06	0.000296919	13	20403667	20525857	crystallin lambda 1 [Source:HGNC Symbol;Acc:HGNC:18246]
ENSG00000076662	ICAM3	-1.47212	7.40687e-05	0.00263875	19	10333776	10339823	intercellular adhesion molecule 3 [Source:HGNC Symbol;Acc:HGNC:5346]
ENSG00000124570	SERPINB6	-1.46943	6.75045e-11	1.26658e-08	6	2948159	2972165	serpin family B member 6 [Source:HGNC Symbol;Acc:HGNC:8950]
ENSG00000163331	DAPL1	-1.46436	0.0022547	0.0352539	2	158795317	158862781	death associated protein like 1 [Source:HGNC Symbol;Acc:HGNC:21490]
ENSG00000120149	MSX2	-1.46313	4.99381e-06	0.000278705	5	174724533	174730893	msh homeobox 2 [Source:HGNC Symbol;Acc:HGNC:7392]
ENSG00000156804	FBXO32	-1.45907	0.000909672	0.0184188	8	123497889	123541206	F-box protein 32 [Source:HGNC Symbol;Acc:HGNC:16731]
ENSG00000172594	SMPDL3A	-1.45562	0.000653699	0.0143734	6	122789049	122809720	sphingomyelin phosphodiesterase acid like 3A [Source:HGNC Symbol;Acc:HGNC:17389]
ENSG00000048052	HDAC9	-1.44477	0.000720753	0.0154008	7	18086949	19002416	histone deacetylase 9 [Source:HGNC Symbol;Acc:HGNC:14065]
ENSG00000183111	ARHGEF37	-1.43822	3.57817e-07	2.72176e-05	5	149551947	149634968	Rho guanine nucleotide exchange factor 37 [Source:HGNC Symbol;Acc:HGNC:34430]
ENSG00000128335	APOL2	-1.4363	0.00010893	0.00363875	22	36226203	36239954	apolipoprotein L2 [Source:HGNC Symbol;Acc:HGNC:619]
ENSG00000186493	C5orf38	-1.4348	0.000250993	0.00709442	5	2752131	2755397	chromosome 5 open reading frame 38 [Source:HGNC Symbol;Acc:HGNC:24226]
ENSG00000227199	ST7-AS1	-1.42502	0.00197171	0.0319709	7	116952446	116954334	ST7 antisense RNA 1 [Source:HGNC Symbol;Acc:HGNC:16000]
ENSG00000074181	NOTCH3	-1.4241	0.00305947	0.043932	19	15159038	15200981	notch 3 [Source:HGNC Symbol;Acc:HGNC:7883]
ENSG00000075213	SEMA3A	-1.42236	1.44984e-06	9.48945e-05	7	83955777	84492724	semaphorin 3A [Source:HGNC Symbol;Acc:HGNC:10723]
ENSG00000175198	PCCA	-1.42097	9.4455e-09	1.1011e-06	13	100089015	100530437	propionyl-CoA carboxylase alpha subunit [Source:HGNC Symbol;Acc:HGNC:8653]
ENSG00000149591	TAGLN	-1.42038	0.000271869	0.00752259	11	117199321	117204782	transgelin [Source:HGNC Symbol;Acc:HGNC:11553]
ENSG00000119899	SLC17A5	-1.4146	5.00818e-07	3.69536e-05	6	73593379	73654155	solute carrier family 17 member 5 [Source:HGNC Symbol;Acc:HGNC:10933]
ENSG00000100031	GGT1	-1.41304	0.00175039	0.0295485	22	24583750	24629005	gamma-glutamyltransferase 1 [Source:HGNC Symbol;Acc:HGNC:4250]
ENSG00000147394	ZNF185	-1.41051	1.56197e-06	0.000101225	X	152914442	152973480	zinc finger protein 185 (LIM domain) [Source:HGNC Symbol;Acc:HGNC:12976]
ENSG00000151474	FRMD4A	-1.40977	0.00211954	0.0336208	10	13643706	14462142	FERM domain containing 4A [Source:HGNC Symbol;Acc:HGNC:25491]
ENSG00000139410	SDSL	-1.40796	0.00261459	0.0392308	12	113422237	113438276	serine dehydratase like [Source:HGNC Symbol;Acc:HGNC:30404]
ENSG00000133466	C1QTNF6	-1.40439	0.000303115	0.00813579	22	37180167	37199385	C1q and tumor necrosis factor related protein 6 [Source:HGNC Symbol;Acc:HGNC:14343]
ENSG00000100767	PAPLN	-1.40329	0.000243589	0.00692489	14	73237497	73274640	papilin, proteoglycan like sulfated glycoprotein [Source:HGNC Symbol;Acc:HGNC:19262]
ENSG00000139725	RHOF	-1.40287	0.00114182	0.0218187	12	121777754	121803403	ras homolog family member F, filopodia associated [Source:HGNC Symbol;Acc:HGNC:15703]
ENSG00000224152	AC009506.1	-1.39402	0.00145563	0.0260185	2	159615296	159617082
ENSG00000041353	RAB27B	-1.38995	0.00099653	0.0198109	18	54717860	54895516	RAB27B, member RAS oncogene family [Source:HGNC Symbol;Acc:HGNC:9767]
ENSG00000169752	NRG4	-1.38121	0.00126843	0.0235305	15	75935969	76059795	neuregulin 4 [Source:HGNC Symbol;Acc:HGNC:29862]
ENSG00000165695	AK8	-1.36861	0.00048443	0.0114294	9	132725578	132878777	adenylate kinase 8 [Source:HGNC Symbol;Acc:HGNC:26526]
ENSG00000133056	PIK3C2B	-1.36828	0.00270981	0.0401701	1	204422628	204494724	phosphatidylinositol-4-phosphate 3-kinase catalytic subunit type 2 beta [Source:HGNC Symbol;Acc:HGNC:8972]
ENSG00000185551	NR2F2	-1.35833	0.000768125	0.0161848	15	96325938	96340263	nuclear receptor subfamily 2 group F member 2 [Source:HGNC Symbol;Acc:HGNC:7976]
ENSG00000233901	LINC01503	-1.35554	5.40515e-06	0.000297449	9	129332300	129359538	long intergenic non-protein coding RNA 1503 [Source:HGNC Symbol;Acc:HGNC:51184]
ENSG00000140450	ARRDC4	-1.35531	0.002773	0.0409526	15	97960698	97973838	arrestin domain containing 4 [Source:HGNC Symbol;Acc:HGNC:28087]
ENSG00000054179	ENTPD2	-1.34966	4.93702e-05	0.00190341	9	137048098	137054045	ectonucleoside triphosphate diphosphohydrolase 2 [Source:HGNC Symbol;Acc:HGNC:3364]
ENSG00000196636	SDHAF3	-1.34747	0.0023692	0.0365511	7	97116590	97181763	succinate dehydrogenase complex assembly factor 3 [Source:HGNC Symbol;Acc:HGNC:21752]
ENSG00000073150	PANX2	-1.3463	2.79264e-05	0.00116317	22	50170731	50180294	pannexin 2 [Source:HGNC Symbol;Acc:HGNC:8600]
ENSG00000260822	GS1-358P8.4	-1.34378	0.000131675	0.00424569	X	24545516	24550466
ENSG00000141441	GAREM1	-1.34206	0.000178965	0.00543584	18	32124877	32470484	GRB2 associated regulator of MAPK1 subtype 1 [Source:HGNC Symbol;Acc:HGNC:26136]
ENSG00000063438	AHRR	-1.34189	0.000763648	0.0161318	5	304176	438291	aryl-hydrocarbon receptor repressor [Source:HGNC Symbol;Acc:HGNC:346]
ENSG00000203722	RAET1G	-1.34157	0.000204198	0.00606772	6	149916878	149923121	retinoic acid early transcript 1G [Source:HGNC Symbol;Acc:HGNC:16795]
ENSG00000067992	PDK3	-1.33693	2.69096e-07	2.1291e-05	X	24465221	24539837	pyruvate dehydrogenase kinase 3 [Source:HGNC Symbol;Acc:HGNC:8811]
ENSG00000144746	ARL6IP5	-1.33478	1.75346e-05	0.000814739	3	69084944	69106066	ADP ribosylation factor like GTPase 6 interacting protein 5 [Source:HGNC Symbol;Acc:HGNC:16937]
ENSG00000115255	REEP6	-1.33379	1.81124e-06	0.000114737	19	1490747	1497927	receptor accessory protein 6 [Source:HGNC Symbol;Acc:HGNC:30078]
ENSG00000113594	LIFR	-1.33267	0.000724692	0.0154515	5	38474963	38608354	leukemia inhibitory factor receptor alpha [Source:HGNC Symbol;Acc:HGNC:6597]
ENSG00000135063	FAM189A2	-1.33116	1.49193e-05	0.000710149	9	69324572	69392455	family with sequence similarity 189 member A2 [Source:HGNC Symbol;Acc:HGNC:24820]
ENSG00000164442	CITED2	-1.33059	0.000506354	0.0117735	6	139371807	139374620	Cbp/p300 interacting transactivator with Glu/Asp rich carboxy-terminal domain 2 [Source:HGNC Symbol;Acc:HGNC:1987]
ENSG00000005059	MCUB	-1.32779	2.96866e-05	0.00122355	4	109560205	109688726	mitochondrial calcium uniporter dominant negative beta subunit [Source:HGNC Symbol;Acc:HGNC:26076]
ENSG00000137103	TMEM8B	-1.32539	2.22606e-05	0.000988522	9	35814451	35854847	transmembrane protein 8B [Source:HGNC Symbol;Acc:HGNC:21427]
ENSG00000111961	SASH1	-1.32448	0.00243539	0.0373383	6	148272304	148552050	SAM and SH3 domain containing 1 [Source:HGNC Symbol;Acc:HGNC:19182]
ENSG00000099338	CATSPERG	-1.31863	0.00261865	0.0392618	19	38335775	38370943	cation channel sperm associated auxiliary subunit gamma [Source:HGNC Symbol;Acc:HGNC:25243]
ENSG00000125354	SEPT6	-1.31827	0.000863721	0.0177288	X	119615724	119693370	septin 6 [Source:HGNC Symbol;Acc:HGNC:15848]
ENSG00000168032	ENTPD3	-1.31804	0.00108643	0.0210874	3	40387156	40428619	ectonucleoside triphosphate diphosphohydrolase 3 [Source:HGNC Symbol;Acc:HGNC:3365]
ENSG00000102312	PORCN	-1.31715	2.06381e-05	0.000935215	X	48508962	48520814	porcupine homolog (Drosophila) [Source:HGNC Symbol;Acc:HGNC:17652]
ENSG00000135338	LCA5	-1.31562	0.00202162	0.032589	6	79484991	79537458	LCA5, lebercilin [Source:HGNC Symbol;Acc:HGNC:31923]
ENSG00000168077	SCARA3	-1.29107	0.000417404	0.0103248	8	27633868	27676776	scavenger receptor class A member 3 [Source:HGNC Symbol;Acc:HGNC:19000]
ENSG00000148671	ADIRF	-1.29044	0.000444248	0.0107918	10	86968192	86983934	adipogenesis regulatory factor [Source:HGNC Symbol;Acc:HGNC:24043]
ENSG00000196422	PPP1R26	-1.28776	0.000465218	0.0110425	9	135479079	135488893	protein phosphatase 1 regulatory subunit 26 [Source:HGNC Symbol;Acc:HGNC:29089]
ENSG00000099308	MAST3	-1.27921	0.000454964	0.0109654	19	18097793	18151692	microtubule associated serine/threonine kinase 3 [Source:HGNC Symbol;Acc:HGNC:19036]
ENSG00000160999	SH2B2	-1.27295	2.73803e-05	0.00114527	7	102285091	102321711	SH2B adaptor protein 2 [Source:HGNC Symbol;Acc:HGNC:17381]
ENSG00000138413	IDH1	-1.27202	6.33717e-05	0.00233362	2	208236227	208266074	isocitrate dehydrogenase (NADP(+)) 1, cytosolic [Source:HGNC Symbol;Acc:HGNC:5382]
ENSG00000137975	CLCA2	-1.27061	7.60425e-05	0.00269445	1	86424086	86456558	chloride channel accessory 2 [Source:HGNC Symbol;Acc:HGNC:2016]
ENSG00000121417	ZNF211	-1.26653	2.95173e-05	0.00121967	19	57630395	57642779	zinc finger protein 211 [Source:HGNC Symbol;Acc:HGNC:13003]
ENSG00000171345	KRT19	-1.2605	0.000312774	0.00827108	17	41523617	41528308	keratin 19 [Source:HGNC Symbol;Acc:HGNC:6436]
ENSG00000183666	GUSBP1	-1.26017	0.000601609	0.01353	5	21341833	21589372	glucuronidase, beta pseudogene 1 [Source:HGNC Symbol;Acc:HGNC:13670]
ENSG00000164244	PRRC1	-1.25871	4.71181e-09	5.95048e-07	5	127517609	127555089	proline rich coiled-coil 1 [Source:HGNC Symbol;Acc:HGNC:28164]
ENSG00000261801	LOXL1-AS1	-1.25767	0.00195284	0.0318221	15	73908071	73928248	LOXL1 antisense RNA 1 [Source:HGNC Symbol;Acc:HGNC:44169]
ENSG00000157111	TMEM171	-1.25064	0.00109039	0.0211227	5	73120292	73131817	transmembrane protein 171 [Source:HGNC Symbol;Acc:HGNC:27031]
ENSG00000124766	SOX4	-1.25047	0.00310397	0.0445004	6	21592768	21598619	SRY-box 4 [Source:HGNC Symbol;Acc:HGNC:11200]
ENSG00000165272	AQP3	-1.24868	0.00283372	0.041631	9	33441154	33447611	aquaporin 3 (Gill blood group) [Source:HGNC Symbol;Acc:HGNC:636]
ENSG00000156973	PDE6D	-1.24779	1.64237e-05	0.00076856	2	231732425	231786272	phosphodiesterase 6D [Source:HGNC Symbol;Acc:HGNC:8788]
ENSG00000076864	RAP1GAP	-1.24582	0.00036249	0.00921473	1	21596215	21669363	RAP1 GTPase activating protein [Source:HGNC Symbol;Acc:HGNC:9858]
ENSG00000143801	PSEN2	-1.24529	0.00196736	0.031953	1	226870184	226896105	presenilin 2 [Source:HGNC Symbol;Acc:HGNC:9509]
ENSG00000112367	FIG4	-1.24351	0.00165581	0.0284466	6	109691312	109825428	FIG4 phosphoinositide 5-phosphatase [Source:HGNC Symbol;Acc:HGNC:16873]
ENSG00000132688	NES	-1.24198	0.00285443	0.0418583	1	156668763	156677397	nestin [Source:HGNC Symbol;Acc:HGNC:7756]
ENSG00000213080	RP11-312J18.5	-1.23913	0.000131895	0.00424584	1	160894980	160896076
ENSG00000152642	GPD1L	-1.23885	6.59895e-05	0.00239863	3	32105689	32168713	glycerol-3-phosphate dehydrogenase 1-like [Source:HGNC Symbol;Acc:HGNC:28956]
ENSG00000072062	PRKACA	-1.23658	9.24505e-09	1.08415e-06	19	14091688	14118084	protein kinase cAMP-activated catalytic subunit alpha [Source:HGNC Symbol;Acc:HGNC:9380]
ENSG00000248334	WHAMMP2	-1.23446	0.00339477	0.0472476	15	28737583	28759204	WAS protein homolog associated with actin, golgi membranes and microtubules pseudogene 2 [Source:HGNC Symbol;Acc:HGNC:32360]
ENSG00000182240	BACE2	-1.23043	1.47341e-05	0.000706269	21	41167801	41282518	beta-site APP-cleaving enzyme 2 [Source:HGNC Symbol;Acc:HGNC:934]
ENSG00000102172	SMS	-1.22621	1.76586e-05	0.00081857	X	21940573	21994835	spermine synthase [Source:HGNC Symbol;Acc:HGNC:11123]
ENSG00000145743	FBXL17	-1.22435	0.000696367	0.01501	5	107859035	108382098	F-box and leucine rich repeat protein 17 [Source:HGNC Symbol;Acc:HGNC:13615]
ENSG00000072954	TMEM38A	-1.22	3.61797e-05	0.00145465	19	16661127	16690029	transmembrane protein 38A [Source:HGNC Symbol;Acc:HGNC:28462]
ENSG00000177721	ANXA2R	-1.21938	0.000232921	0.00670731	5	43039081	43043170	annexin A2 receptor [Source:HGNC Symbol;Acc:HGNC:33463]
ENSG00000072210	ALDH3A2	-1.2174	9.37989e-05	0.00323631	17	19648136	19677598	aldehyde dehydrogenase 3 family member A2 [Source:HGNC Symbol;Acc:HGNC:403]
ENSG00000124299	PEPD	-1.21259	2.82303e-06	0.000168026	19	33386950	33521794	peptidase D [Source:HGNC Symbol;Acc:HGNC:8840]
ENSG00000231584	FAHD2CP	-1.21149	0.00194565	0.0317574	2	96010551	96023380	fumarylacetoacetate hydrolase domain containing 2C, pseudogene [Source:HGNC Symbol;Acc:HGNC:44135]
ENSG00000159231	CBR3	-1.20995	2.81988e-05	0.00117203	21	36134912	36146566	carbonyl reductase 3 [Source:HGNC Symbol;Acc:HGNC:1549]
ENSG00000186088	GSAP	-1.20761	4.17071e-05	0.00165024	7	77310751	77416400	gamma-secretase activating protein [Source:HGNC Symbol;Acc:HGNC:28042]
ENSG00000144320	LNPK	-1.20709	4.37459e-06	0.00025013	2	175923892	176002839	lunapark, ER junction formation factor [Source:HGNC Symbol;Acc:HGNC:21610]
ENSG00000142459	EVI5L	-1.20592	9.53317e-05	0.00326064	19	7830233	7864976	ecotropic viral integration site 5 like [Source:HGNC Symbol;Acc:HGNC:30464]
ENSG00000182670	TTC3	-1.19649	4.98748e-09	6.21888e-07	21	37073226	37203112	tetratricopeptide repeat domain 3 [Source:HGNC Symbol;Acc:HGNC:12393]
ENSG00000179913	B3GNT3	-1.19553	0.000626405	0.0140077	19	17794828	17813082	UDP-GlcNAc:betaGal beta-1,3-N-acetylglucosaminyltransferase 3 [Source:HGNC Symbol;Acc:HGNC:13528]
ENSG00000105227	PRX	-1.19264	0.000467236	0.011077	19	40393768	40413366	periaxin [Source:HGNC Symbol;Acc:HGNC:13797]
ENSG00000174628	IQCK	-1.18762	0.000163183	0.00505484	16	19716456	19858467	IQ motif containing K [Source:HGNC Symbol;Acc:HGNC:28556]
ENSG00000152620	NADK2	-1.18345	1.47534e-06	9.62442e-05	5	36192592	36242279	NAD kinase 2, mitochondrial [Source:HGNC Symbol;Acc:HGNC:26404]
ENSG00000173402	DAG1	-1.18045	0.000719047	0.015381	3	49468703	49535618	dystroglycan 1 [Source:HGNC Symbol;Acc:HGNC:2666]
ENSG00000130304	SLC27A1	-1.18018	5.33339e-05	0.0020129	19	17468769	17506168	solute carrier family 27 member 1 [Source:HGNC Symbol;Acc:HGNC:10995]
ENSG00000128604	IRF5	-1.17399	3.47927e-07	2.67754e-05	7	128937612	128950035	interferon regulatory factor 5 [Source:HGNC Symbol;Acc:HGNC:6120]
ENSG00000198189	HSD17B11	-1.17175	0.000435121	0.0106225	4	87336610	87391386	hydroxysteroid 17-beta dehydrogenase 11 [Source:HGNC Symbol;Acc:HGNC:22960]
ENSG00000130741	EIF2S3	-1.17042	9.76966e-09	1.13219e-06	X	24054716	24077971	eukaryotic translation initiation factor 2 subunit gamma [Source:HGNC Symbol;Acc:HGNC:3267]
ENSG00000106460	TMEM106B	-1.16563	0.000484535	0.0114294	7	12211241	12243367	transmembrane protein 106B [Source:HGNC Symbol;Acc:HGNC:22407]
ENSG00000106477	CEP41	-1.16525	0.000418155	0.0103248	7	130393771	130442433	centrosomal protein 41 [Source:HGNC Symbol;Acc:HGNC:12370]
ENSG00000117226	GBP3	-1.16254	0.00010226	0.00346156	1	89006666	89022894	guanylate binding protein 3 [Source:HGNC Symbol;Acc:HGNC:4184]
ENSG00000102038	SMARCA1	-1.16168	0.000928927	0.0187125	X	129446501	129523500	SWI/SNF related, matrix associated, actin dependent regulator of chromatin, subfamily a, member 1 [Source:HGNC Symbol;Acc:HGNC:11097]
ENSG00000074527	NTN4	-1.15856	0.000652585	0.0143649	12	95657807	95791152	netrin 4 [Source:HGNC Symbol;Acc:HGNC:13658]
ENSG00000141971	MVB12A	-1.15845	2.51905e-06	0.000154124	19	17405722	17433724	multivesicular body subunit 12A [Source:HGNC Symbol;Acc:HGNC:25153]
ENSG00000122707	RECK	-1.15836	0.00250026	0.0379782	9	36036433	36124451	reversion inducing cysteine rich protein with kazal motifs [Source:HGNC Symbol;Acc:HGNC:11345]
ENSG00000106367	AP1S1	-1.1566	1.09548e-10	1.99834e-08	7	101154397	101161596	adaptor related protein complex 1 sigma 1 subunit [Source:HGNC Symbol;Acc:HGNC:559]
ENSG00000005469	CROT	-1.15534	0.000171918	0.00526744	7	87345681	87399795	carnitine O-octanoyltransferase [Source:HGNC Symbol;Acc:HGNC:2366]
ENSG00000184922	FMNL1	-1.1524	0.000252778	0.00711426	17	45221444	45247320	formin like 1 [Source:HGNC Symbol;Acc:HGNC:1212]
ENSG00000113328	CCNG1	-1.14715	0.000882872	0.0180057	5	163437569	163446151	cyclin G1 [Source:HGNC Symbol;Acc:HGNC:1592]
ENSG00000184497	TMEM255B	-1.1437	0.00323044	0.0457711	13	113759240	113816995	transmembrane protein 255B [Source:HGNC Symbol;Acc:HGNC:28297]
ENSG00000124374	PAIP2B	-1.14082	0.0008282	0.017139	2	71182739	71227083	poly(A) binding protein interacting protein 2B [Source:HGNC Symbol;Acc:HGNC:29200]
ENSG00000130733	YIPF2	-1.14077	0.000939153	0.0188414	19	10922185	10928681	Yip1 domain family member 2 [Source:HGNC Symbol;Acc:HGNC:28476]
ENSG00000235609	AF127936.9	-1.14063	0.00194067	0.0317287	21	14818843	15014430
ENSG00000068024	HDAC4	-1.14016	0.00146262	0.0260534	2	239048168	239401654	histone deacetylase 4 [Source:HGNC Symbol;Acc:HGNC:14063]
ENSG00000196839	ADA	-1.14006	1.53824e-05	0.000724998	20	44619522	44652233	adenosine deaminase [Source:HGNC Symbol;Acc:HGNC:186]
ENSG00000174010	KLHL15	-1.13978	0.000436307	0.0106382	X	23983720	24027186	kelch like family member 15 [Source:HGNC Symbol;Acc:HGNC:29347]
ENSG00000111911	HINT3	-1.13906	3.46602e-07	2.67754e-05	6	125956781	125980244	histidine triad nucleotide binding protein 3 [Source:HGNC Symbol;Acc:HGNC:18468]
ENSG00000162407	PLPP3	-1.13783	0.00255612	0.0386182	1	56494747	56645301	phospholipid phosphatase 3 [Source:HGNC Symbol;Acc:HGNC:9229]
ENSG00000095203	EPB41L4B	-1.13614	0.00268769	0.0400228	9	109171975	109320964	erythrocyte membrane protein band 4.1 like 4B [Source:HGNC Symbol;Acc:HGNC:19818]
ENSG00000164308	ERAP2	-1.13515	4.29077e-05	0.00168536	5	96875939	96919716	endoplasmic reticulum aminopeptidase 2 [Source:HGNC Symbol;Acc:HGNC:29499]
ENSG00000002587	HS3ST1	-1.1342	0.00357914	0.0489331	4	11393150	11429765	heparan sulfate-glucosamine 3-sulfotransferase 1 [Source:HGNC Symbol;Acc:HGNC:5194]
ENSG00000127220	ABHD8	-1.1235	0.000739063	0.01569	19	17292131	17310236	abhydrolase domain containing 8 [Source:HGNC Symbol;Acc:HGNC:23759]
ENSG00000123989	CHPF	-1.12257	1.16424e-09	1.71169e-07	2	219538947	219543787	chondroitin polymerizing factor [Source:HGNC Symbol;Acc:HGNC:24291]
ENSG00000141429	GALNT1	-1.12206	0.00172169	0.0293526	18	35581117	35711834	polypeptide N-acetylgalactosaminyltransferase 1 [Source:HGNC Symbol;Acc:HGNC:4123]
ENSG00000144730	IL17RD	-1.12176	1.521e-05	0.000720316	3	57089982	57170306	interleukin 17 receptor D [Source:HGNC Symbol;Acc:HGNC:17616]
ENSG00000128340	RAC2	-1.11801	0.000232717	0.00670731	22	37225261	37244448	ras-related C3 botulinum toxin substrate 2 (rho family, small GTP binding protein Rac2) [Source:HGNC Symbol;Acc:HGNC:9802]
ENSG00000124098	FAM210B	-1.11667	0.0010634	0.0207837	20	56358915	56368663	family with sequence similarity 210 member B [Source:HGNC Symbol;Acc:HGNC:16102]
ENSG00000181982	CCDC149	-1.1142	0.000962368	0.0192679	4	24806117	24980204	coiled-coil domain containing 149 [Source:HGNC Symbol;Acc:HGNC:25405]
ENSG00000171889	MIR31HG	-1.11371	0.00188195	0.0312091	9	21455642	21559669	MIR31 host gene [Source:HGNC Symbol;Acc:HGNC:37187]
ENSG00000146386	ABRACL	-1.11253	9.25614e-06	0.000479882	6	139028682	139043302	ABRA C-terminal like [Source:HGNC Symbol;Acc:HGNC:21230]
ENSG00000099785	MARCH2	-1.10974	4.08274e-09	5.25713e-07	19	8413270	8439017	membrane associated ring-CH-type finger 2 [Source:HGNC Symbol;Acc:HGNC:28038]
ENSG00000122729	ACO1	-1.10781	0.000338809	0.00873674	9	32384603	32454769	aconitase 1 [Source:HGNC Symbol;Acc:HGNC:117]
ENSG00000174684	B4GAT1	-1.10546	0.000312158	0.0082659	11	66345372	66347692	beta-1,4-glucuronyltransferase 1 [Source:HGNC Symbol;Acc:HGNC:15685]
ENSG00000128656	CHN1	-1.10087	0.00348046	0.0478497	2	174799363	175005369	chimerin 1 [Source:HGNC Symbol;Acc:HGNC:1943]
ENSG00000104783	KCNN4	-1.09737	0.000108972	0.00363875	19	43766533	43781257	potassium calcium-activated channel subfamily N member 4 [Source:HGNC Symbol;Acc:HGNC:6293]
ENSG00000001036	FUCA2	-1.09123	1.07343e-06	7.29226e-05	6	143494811	143511690	fucosidase, alpha-L- 2, plasma [Source:HGNC Symbol;Acc:HGNC:4008]
ENSG00000146072	TNFRSF21	-1.09058	0.00029682	0.00804574	6	47231532	47309905	TNF receptor superfamily member 21 [Source:HGNC Symbol;Acc:HGNC:13469]
ENSG00000113391	FAM172A	-1.09001	2.11235e-05	0.000950123	5	93618069	94111699	family with sequence similarity 172 member A [Source:HGNC Symbol;Acc:HGNC:25365]
ENSG00000106785	TRIM14	-1.07867	0.00151765	0.0266947	9	98069275	98119212	tripartite motif containing 14 [Source:HGNC Symbol;Acc:HGNC:16283]
ENSG00000167106	FAM102A	-1.07394	3.14664e-09	4.16054e-07	9	127940579	127980513	family with sequence similarity 102 member A [Source:HGNC Symbol;Acc:HGNC:31419]
ENSG00000143162	CREG1	-1.07268	0.000257222	0.0072187	1	167529677	167553767	cellular repressor of E1A stimulated genes 1 [Source:HGNC Symbol;Acc:HGNC:2351]
ENSG00000188352	FOCAD	-1.07102	0.000338589	0.00873674	9	20658309	20995955	focadhesin [Source:HGNC Symbol;Acc:HGNC:23377]
ENSG00000169258	GPRIN1	-1.06952	0.000912179	0.0184506	5	176595802	176610133	G protein regulated inducer of neurite outgrowth 1 [Source:HGNC Symbol;Acc:HGNC:24835]
ENSG00000128595	CALU	-1.06895	3.28725e-07	2.54969e-05	7	128739292	128771807	calumenin [Source:HGNC Symbol;Acc:HGNC:1458]
ENSG00000237172	B3GNT9	-1.06732	0.000575047	0.0130368	16	67148105	67151214	UDP-GlcNAc:betaGal beta-1,3-N-acetylglucosaminyltransferase 9 [Source:HGNC Symbol;Acc:HGNC:28714]
ENSG00000171159	C9orf16	-1.06355	0.00131995	0.0241227	9	128160260	128163928	chromosome 9 open reading frame 16 [Source:HGNC Symbol;Acc:HGNC:17823]
ENSG00000102316	MAGED2	-1.06181	9.38415e-08	8.59893e-06	X	54807599	54816012	MAGE family member D2 [Source:HGNC Symbol;Acc:HGNC:16353]
ENSG00000105612	DNASE2	-1.06179	0.00106017	0.0207411	19	12875211	12881468	deoxyribonuclease 2, lysosomal [Source:HGNC Symbol;Acc:HGNC:2960]
ENSG00000163947	ARHGEF3	-1.05886	0.00189726	0.0313459	3	56727418	57079329	Rho guanine nucleotide exchange factor 3 [Source:HGNC Symbol;Acc:HGNC:683]
ENSG00000135916	ITM2C	-1.05814	0.00217344	0.0342551	2	230864639	230879248	integral membrane protein 2C [Source:HGNC Symbol;Acc:HGNC:6175]
ENSG00000001617	SEMA3F	-1.05766	0.00212529	0.0336849	3	50155045	50189075	semaphorin 3F [Source:HGNC Symbol;Acc:HGNC:10728]
ENSG00000107537	PHYH	-1.05464	7.1189e-05	0.00255463	10	13277796	13302412	phytanoyl-CoA 2-hydroxylase [Source:HGNC Symbol;Acc:HGNC:8940]
ENSG00000184898	RBM43	-1.04495	0.00202978	0.0326368	2	151247940	151261879	RNA binding motif protein 43 [Source:HGNC Symbol;Acc:HGNC:24790]
ENSG00000106080	FKBP14	-1.04435	1.44398e-07	1.25875e-05	7	30010587	30026684	FK506 binding protein 14 [Source:HGNC Symbol;Acc:HGNC:18625]
ENSG00000087842	PIR	-1.04307	0.0032835	0.046272	X	15384799	15493564	pirin [Source:HGNC Symbol;Acc:HGNC:30048]
ENSG00000151150	ANK3	-1.04277	0.0021114	0.0335728	10	60026298	60733490	ankyrin 3 [Source:HGNC Symbol;Acc:HGNC:494]
ENSG00000106524	ANKMY2	-1.04141	0.000458	0.0109903	7	16599776	16645817	ankyrin repeat and MYND domain containing 2 [Source:HGNC Symbol;Acc:HGNC:25370]
ENSG00000173852	DPY19L1	-1.03818	0.000201576	0.00599886	7	34928876	35038271	dpy-19 like 1 [Source:HGNC Symbol;Acc:HGNC:22205]
ENSG00000173269	MMRN2	-1.03815	0.00219732	0.034521	10	86935540	86969481	multimerin 2 [Source:HGNC Symbol;Acc:HGNC:19888]
ENSG00000129493	HEATR5A	-1.03763	0.00125767	0.0233528	14	31291791	31420582	HEAT repeat containing 5A [Source:HGNC Symbol;Acc:HGNC:20276]
ENSG00000173409	ARV1	-1.0366	3.91431e-05	0.00155789	1	230978981	231000595	ARV1 homolog, fatty acid homeostasis modulator [Source:HGNC Symbol;Acc:HGNC:29561]
ENSG00000104611	SH2D4A	-1.03226	0.000167512	0.00516455	8	19313617	19396218	SH2 domain containing 4A [Source:HGNC Symbol;Acc:HGNC:26102]
ENSG00000271447	MMP28	-1.03176	0.000252354	0.00711247	17	35756249	35795707	matrix metallopeptidase 28 [Source:HGNC Symbol;Acc:HGNC:14366]
ENSG00000157020	SEC13	-1.02923	0.000266018	0.00738143	3	10293131	10321178	SEC13 homolog, nuclear pore and COPII coat complex component [Source:HGNC Symbol;Acc:HGNC:10697]
ENSG00000144199	FAHD2B	-1.02907	5.58945e-06	0.000305883	2	97083583	97094882	fumarylacetoacetate hydrolase domain containing 2B [Source:HGNC Symbol;Acc:HGNC:25318]
ENSG00000018510	AGPS	-1.02766	5.2949e-05	0.00200606	2	177392644	177559299	alkylglycerone phosphate synthase [Source:HGNC Symbol;Acc:HGNC:327]
ENSG00000158623	COPG2	-1.02662	6.71776e-05	0.00242393	7	130506238	130668748	coatomer protein complex subunit gamma 2 [Source:HGNC Symbol;Acc:HGNC:2237]
ENSG00000128581	IFT22	-1.02625	0.000310118	0.00823853	7	101313367	101321823	intraflagellar transport 22 [Source:HGNC Symbol;Acc:HGNC:21895]
ENSG00000123131	PRDX4	-1.02401	0.00202775	0.0326368	X	23664262	23686399	peroxiredoxin 4 [Source:HGNC Symbol;Acc:HGNC:17169]
ENSG00000105552	BCAT2	-1.0207	5.23525e-08	5.26223e-06	19	48795062	48811029	branched chain amino acid transaminase 2 [Source:HGNC Symbol;Acc:HGNC:977]
ENSG00000165813	CCDC186	-1.02025	0.00017907	0.00543584	10	114120862	114174220	coiled-coil domain containing 186 [Source:HGNC Symbol;Acc:HGNC:24349]
ENSG00000115365	LANCL1	-1.02023	0.00294441	0.0426843	2	210431249	210477652	LanC like 1 [Source:HGNC Symbol;Acc:HGNC:6508]
ENSG00000174132	FAM174A	-1.01666	0.000237061	0.0067686	5	100535305	100586741	family with sequence similarity 174 member A [Source:HGNC Symbol;Acc:HGNC:24943]
ENSG00000022976	ZNF839	-1.01632	0.00111714	0.021493	14	102317377	102342702	zinc finger protein 839 [Source:HGNC Symbol;Acc:HGNC:20345]
ENSG00000137414	FAM8A1	-1.01341	0.000416117	0.0103248	6	17600355	17611719	family with sequence similarity 8 member A1 [Source:HGNC Symbol;Acc:HGNC:16372]
ENSG00000146733	PSPH	-1.00978	0.000208453	0.00616627	7	56011051	56051604	phosphoserine phosphatase [Source:HGNC Symbol;Acc:HGNC:9577]
ENSG00000113615	SEC24A	-1.00808	1.17814e-06	7.86797e-05	5	134648789	134727823	SEC24 homolog A, COPII coat complex component [Source:HGNC Symbol;Acc:HGNC:10703]
ENSG00000112977	DAP	-1.00733	2.72003e-06	0.000162386	5	10679230	10761272	death associated protein [Source:HGNC Symbol;Acc:HGNC:2672]
ENSG00000105854	PON2	-1.00727	0.00090305	0.0183412	7	95404863	95435329	paraoxonase 2 [Source:HGNC Symbol;Acc:HGNC:9205]
ENSG00000156535	CD109	-1.00333	0.00303765	0.0436822	6	73695785	73828316	CD109 molecule [Source:HGNC Symbol;Acc:HGNC:21685]
ENSG00000115415	STAT1	-0.997863	6.38267e-05	0.00234162	2	190964358	191020960	signal transducer and activator of transcription 1 [Source:HGNC Symbol;Acc:HGNC:11362]
ENSG00000087253	LPCAT2	-0.997687	0.000432826	0.0105795	16	55508998	55586670	lysophosphatidylcholine acyltransferase 2 [Source:HGNC Symbol;Acc:HGNC:26032]
ENSG00000204310	AGPAT1	-0.996615	6.63024e-05	0.00240115	6	32168212	32178096	1-acylglycerol-3-phosphate O-acyltransferase 1 [Source:HGNC Symbol;Acc:HGNC:324]

## Sheet: GefR vs Control SCC16-PDX UP
Supplementary Table S1: Genes with upregulated expression in GefR SCC16-PDX vs Control SCC16-PDX (padj<0.05; FC>2)
ID	Gene Symbol	log2 Fold Change GefR vs Control SCC16-PDX	pvalue GefR vs Control SCC16-PDX	padj GefR vs Control SCC16-PDX	chromosome name	start position	end position	description
ENSG00000108622	ICAM2	7.21787	3.07747e-05	0.00281199	17	64002594	64020634	intercellular adhesion molecule 2 [Source:HGNC Symbol;Acc:HGNC:5345]
ENSG00000176075	LINC00302	7.08859	2.14276e-05	0.00222338	1	152655477	152656804	long intergenic non-protein coding RNA 302 [Source:HGNC Symbol;Acc:HGNC:31825]
ENSG00000268104	SLC6A14	6.90699	6.90932e-17	4.22989e-13	X	116436622	116461458	solute carrier family 6 member 14 [Source:HGNC Symbol;Acc:HGNC:11047]
ENSG00000145879	SPINK7	6.55753	6.6223e-05	0.0051103	5	148312419	148315922	serine peptidase inhibitor, Kazal type 7 (putative) [Source:HGNC Symbol;Acc:HGNC:24643]
ENSG00000163209	SPRR3	6.48855	2.84305e-12	4.35129e-09	1	153001747	153003856	small proline rich protein 3 [Source:HGNC Symbol;Acc:HGNC:11268]
ENSG00000189320	FAM180A	6.40626	9.51455e-06	0.00123932	7	135728348	135748846	family with sequence similarity 180 member A [Source:HGNC Symbol;Acc:HGNC:33773]
ENSG00000224259	LINC01133	6.2044	8.37072e-12	9.60854e-09	1	159961218	159984750	long intergenic non-protein coding RNA 1133 [Source:HGNC Symbol;Acc:HGNC:49447]
ENSG00000143416	SELENBP1	6.17973	6.67941e-12	8.25975e-09	1	151364302	151372733	selenium binding protein 1 [Source:HGNC Symbol;Acc:HGNC:10719]
ENSG00000267795	SMIM22	5.98268	0.00103695	0.0298038	16	4788397	4796491	small integral membrane protein 22 [Source:HGNC Symbol;Acc:HGNC:48329]
ENSG00000172005	MAL	5.98136	2.45084e-05	0.00239427	2	95025677	95053996	mal, T-cell differentiation protein [Source:HGNC Symbol;Acc:HGNC:6817]
ENSG00000263429	LINC00675	5.90854	9.03835e-05	0.0064092	17	10794913	10804099	long intergenic non-protein coding RNA 675 [Source:HGNC Symbol;Acc:HGNC:44356]
ENSG00000105246	EBI3	5.69985	0.000429953	0.0177052	19	4229498	4237531	Epstein-Barr virus induced 3 [Source:HGNC Symbol;Acc:HGNC:3129]
ENSG00000102243	VGLL1	5.58859	8.78779e-09	4.03491e-06	X	136532152	136556807	vestigial like family member 1 [Source:HGNC Symbol;Acc:HGNC:20985]
ENSG00000224689	ZNF812P	5.46118	0.000220281	0.0115922	19	9689924	9700776	zinc finger protein 812, pseudogene [Source:HGNC Symbol;Acc:HGNC:33242]
ENSG00000257253	RP11-70F11.7	5.45058	0.000194365	0.0106558	12	49861207	49865802
ENSG00000102854	MSLN	4.94341	0.000315374	0.01446	16	760762	768865	mesothelin [Source:HGNC Symbol;Acc:HGNC:7371]
ENSG00000167653	PSCA	4.82181	3.87093e-13	7.89927e-10	8	142670308	142682724	prostate stem cell antigen [Source:HGNC Symbol;Acc:HGNC:9500]
ENSG00000274215	CTD-2313J17.6	4.73558	0.000970421	0.0285621	15	92808451	92809057
ENSG00000167759	KLK13	4.70848	0.000383352	0.0163736	19	51056206	51065114	kallikrein related peptidase 13 [Source:HGNC Symbol;Acc:HGNC:6361]
ENSG00000064787	BCAS1	4.67779	7.7945e-08	2.42633e-05	20	53936777	54070594	breast carcinoma amplified sequence 1 [Source:HGNC Symbol;Acc:HGNC:974]
ENSG00000172935	MRGPRF	4.64147	0.0013758	0.0352765	11	69004395	69013409	MAS related GPR family member F [Source:HGNC Symbol;Acc:HGNC:24828]
ENSG00000185633	NDUFA4L2	4.5755	8.55196e-06	0.00115489	12	57234903	57240715	NDUFA4, mitochondrial complex associated like 2 [Source:HGNC Symbol;Acc:HGNC:29836]
ENSG00000229035	SPRR2C	4.55833	9.87864e-05	0.00680072	1	153140491	153140709	small proline rich protein 2C (pseudogene) [Source:HGNC Symbol;Acc:HGNC:11263]
ENSG00000213468	FIRRE	4.55809	0.000852963	0.0261965	X	131691530	131830643	firre intergenic repeating RNA element [Source:HGNC Symbol;Acc:HGNC:49627]
ENSG00000127129	EDN2	4.5075	6.74596e-12	8.25975e-09	1	41478775	41484673	endothelin 2 [Source:HGNC Symbol;Acc:HGNC:3177]
ENSG00000262406	MMP12	4.49991	1.45483e-05	0.00171278	11	102862736	102875034	matrix metallopeptidase 12 [Source:HGNC Symbol;Acc:HGNC:7158]
ENSG00000006210	CX3CL1	4.4802	0.000270003	0.0131187	16	57372458	57385048	C-X3-C motif chemokine ligand 1 [Source:HGNC Symbol;Acc:HGNC:10647]
ENSG00000129538	RNASE1	4.41551	7.13507e-05	0.00538503	14	20801228	20803278	ribonuclease A family member 1, pancreatic [Source:HGNC Symbol;Acc:HGNC:10044]
ENSG00000154016	GRAP	4.39179	0.000832485	0.0259593	17	19020673	19047637	GRB2-related adaptor protein [Source:HGNC Symbol;Acc:HGNC:4562]
ENSG00000212900	KRTAP3-2	4.38814	5.03686e-06	0.000789528	17	40999193	40999894	keratin associated protein 3-2 [Source:HGNC Symbol;Acc:HGNC:16779]
ENSG00000138685	FGF2	4.35294	0.000978435	0.028691	4	122826708	122898236	fibroblast growth factor 2 [Source:HGNC Symbol;Acc:HGNC:3676]
ENSG00000133321	RARRES3	4.23363	1.51842e-08	6.19716e-06	11	63536809	63546462	retinoic acid receptor responder 3 [Source:HGNC Symbol;Acc:HGNC:9869]
ENSG00000185432	METTL7A	4.17126	2.11736e-05	0.00222214	12	50923472	50932517	methyltransferase like 7A [Source:HGNC Symbol;Acc:HGNC:24550]
ENSG00000153802	TMPRSS11D	4.16242	2.40378e-05	0.0023732	4	67820876	67884032	transmembrane protease, serine 11D [Source:HGNC Symbol;Acc:HGNC:24059]
ENSG00000182585	EPGN	4.11875	4.53356e-13	8.32634e-10	4	74308473	74315307	epithelial mitogen [Source:HGNC Symbol;Acc:HGNC:17470]
ENSG00000105388	CEACAM5	4.11267	7.17053e-09	3.46563e-06	19	41708585	41729798	carcinoembryonic antigen related cell adhesion molecule 5 [Source:HGNC Symbol;Acc:HGNC:1817]
ENSG00000174171	RP11-23P13.6	4.08749	0.00199707	0.0443509	15	41892793	41898575
ENSG00000148346	LCN2	4.08589	7.37787e-06	0.0010504	9	128149071	128153455	lipocalin 2 [Source:HGNC Symbol;Acc:HGNC:6526]
ENSG00000185201	IFITM2	4.0329	3.0307e-13	6.95773e-10	11	307631	315272	interferon induced transmembrane protein 2 [Source:HGNC Symbol;Acc:HGNC:5413]
ENSG00000132854	KANK4	3.98161	1.45204e-06	0.000283705	1	62236979	62319414	KN motif and ankyrin repeat domains 4 [Source:HGNC Symbol;Acc:HGNC:27263]
ENSG00000276527	RP11-442J21.2	3.91766	1.62805e-05	0.00184572	13	44684487	44715393
ENSG00000103534	TMC5	3.88907	0.0010331	0.0297397	16	19410496	19499113	transmembrane channel like 5 [Source:HGNC Symbol;Acc:HGNC:22999]
ENSG00000140465	CYP1A1	3.85924	0.000990197	0.0288208	15	74719542	74725610	cytochrome P450 family 1 subfamily A member 1 [Source:HGNC Symbol;Acc:HGNC:2595]
ENSG00000188505	NCCRP1	3.79065	7.35344e-08	2.35899e-05	19	39196961	39201884	non-specific cytotoxic cell receptor protein 1 homolog (zebrafish) [Source:HGNC Symbol;Acc:HGNC:33739]
ENSG00000133328	HRASLS2	3.78962	0.000200344	0.0108862	11	63552770	63563383	HRAS like suppressor 2 [Source:HGNC Symbol;Acc:HGNC:17824]
ENSG00000277632	CCL3	3.78744	8.95855e-05	0.00637723	17	36088256	36090169	C-C motif chemokine ligand 3 [Source:HGNC Symbol;Acc:HGNC:10627]
ENSG00000149596	JPH2	3.73812	1.82263e-10	1.52156e-07	20	44111695	44187578	junctophilin 2 [Source:HGNC Symbol;Acc:HGNC:14202]
ENSG00000214866	DCDC2C	3.68046	1.93322e-05	0.00211342	2	3703592	3847411	doublecortin domain containing 2C [Source:HGNC Symbol;Acc:HGNC:32696]
ENSG00000206828	U1	3.6677	1.53077e-06	0.000295938	1	149636766	149636929	U1 spliceosomal RNA [Source:RFAM;Acc:RF00003]
ENSG00000185499	MUC1	3.64741	1.6837e-10	1.47252e-07	1	155185824	155192916	mucin 1, cell surface associated [Source:HGNC Symbol;Acc:HGNC:7508]
ENSG00000199568	RNU5A-1	3.63744	0.00166222	0.0397548	15	65296051	65296166	RNA, U5A small nuclear 1 [Source:HGNC Symbol;Acc:HGNC:10211]
ENSG00000277610	RNVU1-4	3.60017	4.9008e-05	0.00410214	1	120942600	120942763	RNA, variant U1 small nuclear 4 [Source:HGNC Symbol;Acc:HGNC:48312]
ENSG00000169550	MUC15	3.57955	1.86451e-12	3.11305e-09	11	26559033	26572233	mucin 15, cell surface associated [Source:HGNC Symbol;Acc:HGNC:14956]
ENSG00000232803	SLCO4A1-AS1	3.56357	8.19036e-06	0.00111425	20	62663019	62666724	SLCO4A1 antisense RNA 1 [Source:HGNC Symbol;Acc:HGNC:40537]
ENSG00000100292	HMOX1	3.52384	2.83385e-05	0.00265543	22	35380361	35394214	heme oxygenase 1 [Source:HGNC Symbol;Acc:HGNC:5013]
ENSG00000223722	RP11-467L13.5	3.49301	1.1515e-05	0.00143032	12	31754720	31755121
ENSG00000249395	CASC9	3.47027	8.81979e-10	6.47937e-07	8	75223404	75324741	cancer susceptibility 9 (non-protein coding) [Source:HGNC Symbol;Acc:HGNC:48906]
ENSG00000154277	UCHL1	3.44787	0.000101141	0.00687983	4	41256413	41268455	ubiquitin C-terminal hydrolase L1 [Source:HGNC Symbol;Acc:HGNC:12513]
ENSG00000183671	GPR1	3.44039	0.000950689	0.0281165	2	206175316	206218047	G protein-coupled receptor 1 [Source:HGNC Symbol;Acc:HGNC:4463]
ENSG00000139800	ZIC5	3.4352	5.33969e-06	0.000817239	13	99962964	99971909	Zic family member 5 [Source:HGNC Symbol;Acc:HGNC:20322]
ENSG00000123496	IL13RA2	3.42947	6.22849e-09	3.09169e-06	X	115003975	115019977	interleukin 13 receptor subunit alpha 2 [Source:HGNC Symbol;Acc:HGNC:5975]
ENSG00000170426	SDR9C7	3.40276	0.000652699	0.022603	12	56923154	56934405	short chain dehydrogenase/reductase family 9C member 7 [Source:HGNC Symbol;Acc:HGNC:29958]
ENSG00000162777	DENND2D	3.39409	5.6563e-09	3.06303e-06	1	111187174	111204535	DENN domain containing 2D [Source:HGNC Symbol;Acc:HGNC:26192]
ENSG00000184012	TMPRSS2	3.3686	1.60769e-06	0.000307572	21	41464551	41531116	transmembrane protease, serine 2 [Source:HGNC Symbol;Acc:HGNC:11876]
ENSG00000052344	PRSS8	3.35966	7.67676e-16	2.81983e-12	16	31131433	31135762	protease, serine 8 [Source:HGNC Symbol;Acc:HGNC:9491]
ENSG00000180861	LINC01559	3.33083	0.00017589	0.00993966	12	13371089	13387167	long intergenic non-protein coding RNA 1559 [Source:HGNC Symbol;Acc:HGNC:26598]
ENSG00000164037	SLC9B1	3.27182	0.000416352	0.0173003	4	102885048	103019739	solute carrier family 9 member B1 [Source:HGNC Symbol;Acc:HGNC:24244]
ENSG00000172382	PRSS27	3.25279	2.58828e-11	2.64091e-08	16	2712418	2720551	protease, serine 27 [Source:HGNC Symbol;Acc:HGNC:15475]
ENSG00000104951	IL4I1	3.2404	0.000537499	0.0199026	19	49889654	49929539	interleukin 4 induced 1 [Source:HGNC Symbol;Acc:HGNC:19094]
ENSG00000137959	IFI44L	3.22858	4.89567e-06	0.00077512	1	78619922	78646145	interferon induced protein 44 like [Source:HGNC Symbol;Acc:HGNC:17817]
ENSG00000105427	CNFN	3.22711	0.00146255	0.0367457	19	42387019	42390287	cornifelin [Source:HGNC Symbol;Acc:HGNC:30183]
ENSG00000100336	APOL4	3.21565	0.00244567	0.0499655	22	36189124	36204840	apolipoprotein L4 [Source:HGNC Symbol;Acc:HGNC:14867]
ENSG00000168447	SCNN1B	3.20342	1.00995e-08	4.41637e-06	16	23278231	23381299	sodium channel epithelial 1 beta subunit [Source:HGNC Symbol;Acc:HGNC:10600]
ENSG00000178363	CALML3	3.1976	2.14888e-10	1.71593e-07	10	5524009	5526771	calmodulin like 3 [Source:HGNC Symbol;Acc:HGNC:1452]
ENSG00000197632	SERPINB2	3.19596	6.12256e-08	2.04449e-05	18	63871692	63903890	serpin family B member 2 [Source:HGNC Symbol;Acc:HGNC:8584]
ENSG00000187054	TMPRSS11A	3.19419	1.22931e-06	0.000250862	4	67909385	67964140	transmembrane protease, serine 11A [Source:HGNC Symbol;Acc:HGNC:27954]
ENSG00000176046	NUPR1	3.17565	7.89501e-06	0.00109022	16	28532708	28539174	nuclear protein 1, transcriptional regulator [Source:HGNC Symbol;Acc:HGNC:29990]
ENSG00000137462	TLR2	3.1502	2.38303e-07	6.53235e-05	4	153701500	153705699	toll like receptor 2 [Source:HGNC Symbol;Acc:HGNC:11848]
ENSG00000121769	FABP3	3.14032	0.000762239	0.0249541	1	31365625	31376850	fatty acid binding protein 3 [Source:HGNC Symbol;Acc:HGNC:3557]
ENSG00000135218	CD36	3.13049	5.17267e-07	0.000125002	7	80369575	80679277	CD36 molecule [Source:HGNC Symbol;Acc:HGNC:1663]
ENSG00000147174	GCNA	3.1227	6.30387e-05	0.0049151	X	71578411	71613583	germ cell nuclear acidic peptidase [Source:HGNC Symbol;Acc:HGNC:15805]
ENSG00000258689	LINC01269	3.11147	0.000972025	0.0285635	14	70698698	70712153	long intergenic non-protein coding RNA 1269 [Source:HGNC Symbol;Acc:HGNC:50325]
ENSG00000262202	RP11-160E2.6	3.10714	0.00176688	0.0413025	17	19112000	19112636
ENSG00000183018	SPNS2	3.1038	1.61073e-05	0.00184552	17	4498838	4539035	sphingolipid transporter 2 [Source:HGNC Symbol;Acc:HGNC:26992]
ENSG00000170423	KRT78	3.10161	2.30939e-05	0.00229266	12	52837804	52849092	keratin 78 [Source:HGNC Symbol;Acc:HGNC:28926]
ENSG00000119125	GDA	3.10145	0.000265904	0.0129883	9	72114595	72257193	guanine deaminase [Source:HGNC Symbol;Acc:HGNC:4212]
ENSG00000026751	SLAMF7	3.0614	1.10093e-05	0.00140414	1	160739057	160754821	SLAM family member 7 [Source:HGNC Symbol;Acc:HGNC:21394]
ENSG00000109182	CWH43	3.0497	2.53731e-09	1.66429e-06	4	48986247	49062081	cell wall biogenesis 43 C-terminal homolog [Source:HGNC Symbol;Acc:HGNC:26133]
ENSG00000179799	OR7E22P	3.01443	0.000140972	0.00870356	3	75356516	75357503	olfactory receptor family 7 subfamily E member 22 pseudogene [Source:HGNC Symbol;Acc:HGNC:8394]
ENSG00000135625	EGR4	3.0122	0.000239689	0.0122622	2	73290929	73293705	early growth response 4 [Source:HGNC Symbol;Acc:HGNC:3241]
ENSG00000145103	ILDR1	3.01105	5.83721e-09	3.06303e-06	3	121987323	122022204	immunoglobulin like domain containing receptor 1 [Source:HGNC Symbol;Acc:HGNC:28741]
ENSG00000134321	RSAD2	2.99291	0.00222879	0.0471047	2	6865806	6898239	radical S-adenosyl methionine domain containing 2 [Source:HGNC Symbol;Acc:HGNC:30908]
ENSG00000243742	RPLP0P2	2.97577	3.5779e-05	0.00318176	11	61615036	61639449	ribosomal protein lateral stalk subunit P0 pseudogene 2 [Source:HGNC Symbol;Acc:HGNC:17960]
ENSG00000135374	ELF5	2.93774	0.00132012	0.0343904	11	34478793	34513805	E74 like ETS transcription factor 5 [Source:HGNC Symbol;Acc:HGNC:3320]
ENSG00000166869	CHP2	2.92532	3.5861e-05	0.00318176	16	23754627	23758951	calcineurin like EF-hand protein 2 [Source:HGNC Symbol;Acc:HGNC:24927]
ENSG00000127249	ATP13A4	2.91439	0.000290088	0.0137314	3	193402077	193593111	ATPase 13A4 [Source:HGNC Symbol;Acc:HGNC:25422]
ENSG00000118322	ATP10B	2.90824	9.42072e-06	0.00123586	5	160563120	160852214	ATPase phospholipid transporting 10B (putative) [Source:HGNC Symbol;Acc:HGNC:13543]
ENSG00000189056	RELN	2.90086	0.000872394	0.0265271	7	103471784	103989516	reelin [Source:HGNC Symbol;Acc:HGNC:9957]
ENSG00000244675	AC108676.1	2.88642	0.00202754	0.0445427	3	194496317	194501503
ENSG00000155962	CLIC2	2.87341	6.71777e-05	0.00516228	X	155276211	155334657	chloride intracellular channel 2 [Source:HGNC Symbol;Acc:HGNC:2063]
ENSG00000113739	STC2	2.86893	0.00225704	0.0474831	5	173314713	173329503	stanniocalcin 2 [Source:HGNC Symbol;Acc:HGNC:11374]
ENSG00000108602	ALDH3A1	2.82976	3.30225e-06	0.000556654	17	19737984	19748943	aldehyde dehydrogenase 3 family member A1 [Source:HGNC Symbol;Acc:HGNC:405]
ENSG00000134326	CMPK2	2.82935	0.000354278	0.0155662	2	6840570	6866635	cytidine/uridine monophosphate kinase 2 [Source:HGNC Symbol;Acc:HGNC:27015]
ENSG00000187134	AKR1C1	2.79055	1.44988e-06	0.000283705	10	4963253	4983283	aldo-keto reductase family 1 member C1 [Source:HGNC Symbol;Acc:HGNC:384]
ENSG00000257732	RP11-818F20.5	2.78726	4.56726e-05	0.00391968	12	104262314	104280722
ENSG00000182040	USH1G	2.78225	0.00027074	0.0131198	17	74916084	74923256	USH1 protein network component sans [Source:HGNC Symbol;Acc:HGNC:16356]
ENSG00000196872	KIAA1211L	2.76734	2.31618e-09	1.57552e-06	2	98793846	98936259	KIAA1211 like [Source:HGNC Symbol;Acc:HGNC:33454]
ENSG00000214711	CAPN14	2.76628	1.03847e-05	0.00134314	2	31173056	31233858	calpain 14 [Source:HGNC Symbol;Acc:HGNC:16664]
ENSG00000117009	KMO	2.76545	9.95708e-05	0.00680072	1	241532134	241595642	kynurenine 3-monooxygenase [Source:HGNC Symbol;Acc:HGNC:6381]
ENSG00000140379	BCL2A1	2.7611	0.000440251	0.0178678	15	79960889	79971446	BCL2 related protein A1 [Source:HGNC Symbol;Acc:HGNC:991]
ENSG00000198464	ZNF480	2.75173	8.63396e-11	8.24511e-08	19	52297177	52325922	zinc finger protein 480 [Source:HGNC Symbol;Acc:HGNC:23305]
ENSG00000260186	LINC02137	2.75138	0.00180092	0.0415524	16	58421326	58462470	long intergenic non-protein coding RNA 2137 [Source:HGNC Symbol;Acc:HGNC:52997]
ENSG00000256751	PLBD1-AS1	2.74089	0.000531667	0.0198467	12	14567750	14619755	PLBD1 antisense RNA 1 [Source:HGNC Symbol;Acc:HGNC:51143]
ENSG00000130303	BST2	2.73053	2.1571e-05	0.00222569	19	17402939	17405648	bone marrow stromal cell antigen 2 [Source:HGNC Symbol;Acc:HGNC:1119]
ENSG00000231574	LINC02015	2.72521	0.000223645	0.0116689	3	177816865	177899224	long intergenic non-protein coding RNA 2015 [Source:HGNC Symbol;Acc:HGNC:52850]
ENSG00000189377	CXCL17	2.69421	0.00161692	0.0394898	19	42428288	42443048	C-X-C motif chemokine ligand 17 [Source:HGNC Symbol;Acc:HGNC:19232]
ENSG00000166920	C15orf48	2.66046	1.09707e-06	0.000231595	15	45430529	45448761	chromosome 15 open reading frame 48 [Source:HGNC Symbol;Acc:HGNC:29898]
ENSG00000178860	MSC	2.65433	7.49552e-06	0.00105894	8	71841549	71844468	musculin [Source:HGNC Symbol;Acc:HGNC:7321]
ENSG00000064205	WISP2	2.65104	4.91381e-05	0.00410214	20	44714844	44728509	WNT1 inducible signaling pathway protein 2 [Source:HGNC Symbol;Acc:HGNC:12770]
ENSG00000260196	RP1-239B22.5	2.64553	0.000797865	0.0256308	11	17380649	17383531
ENSG00000151632	AKR1C2	2.64326	4.66648e-07	0.000114273	10	4987400	5018031	aldo-keto reductase family 1 member C2 [Source:HGNC Symbol;Acc:HGNC:385]
ENSG00000165125	TRPV6	2.64021	1.31699e-05	0.00157063	7	142871203	142885762	transient receptor potential cation channel subfamily V member 6 [Source:HGNC Symbol;Acc:HGNC:14006]
ENSG00000169245	CXCL10	2.63802	0.00217901	0.0464265	4	76021117	76023497	C-X-C motif chemokine ligand 10 [Source:HGNC Symbol;Acc:HGNC:10637]
ENSG00000236740	RP11-411K7.1	2.63008	0.000156581	0.00921719	6	53930022	53997667
ENSG00000176945	MUC20	2.59846	0.00132885	0.0344111	3	195720882	195741123	mucin 20, cell surface associated [Source:HGNC Symbol;Acc:HGNC:23282]
ENSG00000116996	ZP4	2.58475	0.00175884	0.0413025	1	237877864	237890922	zona pellucida glycoprotein 4 [Source:HGNC Symbol;Acc:HGNC:15770]
ENSG00000151773	CCDC122	2.57933	0.00190771	0.0430048	13	43823909	43879727	coiled-coil domain containing 122 [Source:HGNC Symbol;Acc:HGNC:26478]
ENSG00000182759	MAFA	2.54822	0.000371295	0.016083	8	143419182	143430406	MAF bZIP transcription factor A [Source:HGNC Symbol;Acc:HGNC:23145]
ENSG00000172782	FADS6	2.53681	0.000119299	0.00768788	17	74877299	74893781	fatty acid desaturase 6 [Source:HGNC Symbol;Acc:HGNC:30459]
ENSG00000136695	IL36RN	2.53517	0.000242524	0.0122884	2	113058638	113065382	interleukin 36 receptor antagonist [Source:HGNC Symbol;Acc:HGNC:15561]
ENSG00000136696	IL36B	2.52193	0.000536529	0.0199026	2	113022091	113052867	interleukin 36, beta [Source:HGNC Symbol;Acc:HGNC:15564]
ENSG00000230387	RP4-737E23.2	2.51569	2.29278e-10	1.75455e-07	20	23187961	23190307
ENSG00000225177	RP11-390P2.4	2.50901	0.000142252	0.00870636	6	138692548	138697288
ENSG00000126709	IFI6	2.5051	6.31582e-05	0.0049151	1	27666061	27672218	interferon alpha inducible protein 6 [Source:HGNC Symbol;Acc:HGNC:4054]
ENSG00000275302	CCL4	2.4911	0.00113679	0.0314078	17	36103590	36105621	C-C motif chemokine ligand 4 [Source:HGNC Symbol;Acc:HGNC:10630]
ENSG00000236453	AC003092.1	2.46667	0.000284329	0.0135636	7	94022833	94066661
ENSG00000160862	AZGP1	2.45842	3.46798e-06	0.00057381	7	99966720	99976157	alpha-2-glycoprotein 1, zinc-binding [Source:HGNC Symbol;Acc:HGNC:910]
ENSG00000179178	TMEM125	2.45677	6.88291e-05	0.00522362	1	43269994	43274002	transmembrane protein 125 [Source:HGNC Symbol;Acc:HGNC:28275]
ENSG00000186377	CYP4X1	2.45347	0.000204491	0.0110787	1	47023568	47050751	cytochrome P450 family 4 subfamily X member 1 [Source:HGNC Symbol;Acc:HGNC:20244]
ENSG00000174567	GOLT1A	2.42339	0.000143929	0.00871702	1	204198160	204214092	golgi transport 1A [Source:HGNC Symbol;Acc:HGNC:24766]
ENSG00000178750	STX19	2.41995	3.43026e-05	0.00308824	3	94014369	94028610	syntaxin 19 [Source:HGNC Symbol;Acc:HGNC:19300]
ENSG00000171227	TMEM37	2.40319	1.51409e-08	6.19716e-06	2	119429901	119438520	transmembrane protein 37 [Source:HGNC Symbol;Acc:HGNC:18216]
ENSG00000197361	FBXL22	2.40123	0.0016826	0.0400813	15	63597353	63602428	F-box and leucine rich repeat protein 22 [Source:HGNC Symbol;Acc:HGNC:27537]
ENSG00000162572	SCNN1D	2.39264	0.000317291	0.01446	1	1280436	1292029	sodium channel epithelial 1 delta subunit [Source:HGNC Symbol;Acc:HGNC:10601]
ENSG00000169509	CRCT1	2.39103	0.00205738	0.0449832	1	152514502	152516010	cysteine rich C-terminal 1 [Source:HGNC Symbol;Acc:HGNC:29875]
ENSG00000176485	PLA2G16	2.36088	9.03686e-07	0.000204604	11	63573195	63616883	phospholipase A2 group XVI [Source:HGNC Symbol;Acc:HGNC:17825]
ENSG00000201558	RNVU1-6	2.34594	0.00117705	0.0320264	1	146052081	146052244	RNA, variant U1 small nuclear 6 [Source:HGNC Symbol;Acc:HGNC:48314]
ENSG00000170231	FABP6	2.33863	8.97867e-11	8.24511e-08	5	160187367	160238735	fatty acid binding protein 6 [Source:HGNC Symbol;Acc:HGNC:3561]
ENSG00000115602	IL1RL1	2.33854	0.000398144	0.0167714	2	102311502	102352037	interleukin 1 receptor like 1 [Source:HGNC Symbol;Acc:HGNC:5998]
ENSG00000149591	TAGLN	2.33789	3.32906e-09	1.97231e-06	11	117199321	117204782	transgelin [Source:HGNC Symbol;Acc:HGNC:11553]
ENSG00000167757	KLK11	2.32727	0.000631884	0.0221224	19	51022216	51028039	kallikrein related peptidase 11 [Source:HGNC Symbol;Acc:HGNC:6359]
ENSG00000123342	MMP19	2.31976	0.000769581	0.0250605	12	55835433	55842966	matrix metallopeptidase 19 [Source:HGNC Symbol;Acc:HGNC:7165]
ENSG00000071909	MYO3B	2.30655	0.00175701	0.0413025	2	170178145	170655171	myosin IIIB [Source:HGNC Symbol;Acc:HGNC:15576]
ENSG00000091513	TF	2.30546	8.25089e-05	0.00598956	3	133745956	133779006	transferrin [Source:HGNC Symbol;Acc:HGNC:11740]
ENSG00000205363	C15orf59	2.30178	0.00112403	0.0312313	15	73735431	73752747	chromosome 15 open reading frame 59 [Source:HGNC Symbol;Acc:HGNC:33753]
ENSG00000136367	ZFHX2	2.27052	0.00242724	0.0498087	14	23520855	23556192	zinc finger homeobox 2 [Source:HGNC Symbol;Acc:HGNC:20152]
ENSG00000240859	AC093627.10	2.26718	0.00018163	0.010146	7	149597	155465
ENSG00000197641	SERPINB13	2.26218	3.3557e-08	1.23262e-05	18	63586989	63604639	serpin family B member 13 [Source:HGNC Symbol;Acc:HGNC:8944]
ENSG00000086548	CEACAM6	2.26171	4.58854e-05	0.00391968	19	41750977	41772208	carcinoembryonic antigen related cell adhesion molecule 6 [Source:HGNC Symbol;Acc:HGNC:1818]
ENSG00000142623	PADI1	2.25029	8.3105e-05	0.00600908	1	17205126	17246005	peptidyl arginine deiminase 1 [Source:HGNC Symbol;Acc:HGNC:18367]
ENSG00000164825	DEFB1	2.24187	0.000248972	0.0124935	8	6870575	6878022	defensin beta 1 [Source:HGNC Symbol;Acc:HGNC:2766]
ENSG00000143882	ATP6V1C2	2.2386	1.68234e-06	0.000315285	2	10721649	10785110	ATPase H+ transporting V1 subunit C2 [Source:HGNC Symbol;Acc:HGNC:18264]
ENSG00000204287	HLA-DRA	2.23656	0.00015269	0.00907545	6	32439842	32445046	major histocompatibility complex, class II, DR alpha [Source:HGNC Symbol;Acc:HGNC:4947]
ENSG00000204219	TCEA3	2.23391	0.000232231	0.0120307	1	23381061	23424740	transcription elongation factor A3 [Source:HGNC Symbol;Acc:HGNC:11615]
ENSG00000149809	TM7SF2	2.2329	4.60041e-08	1.56465e-05	11	65111845	65116384	transmembrane 7 superfamily member 2 [Source:HGNC Symbol;Acc:HGNC:11863]
ENSG00000128284	APOL3	2.22718	0.000182939	0.0101506	22	36140330	36166177	apolipoprotein L3 [Source:HGNC Symbol;Acc:HGNC:14868]
ENSG00000163221	S100A12	2.22236	0.00200399	0.0443678	1	153373706	153375649	S100 calcium binding protein A12 [Source:HGNC Symbol;Acc:HGNC:10489]
ENSG00000133135	RNF128	2.21993	8.90801e-05	0.00636594	X	106693794	106796993	ring finger protein 128, E3 ubiquitin protein ligase [Source:HGNC Symbol;Acc:HGNC:21153]
ENSG00000132274	TRIM22	2.20109	0.000427706	0.0176523	11	5689689	5737089	tripartite motif containing 22 [Source:HGNC Symbol;Acc:HGNC:16379]
ENSG00000118849	RARRES1	2.19029	0.000345788	0.0153399	3	158696892	158732696	retinoic acid receptor responder 1 [Source:HGNC Symbol;Acc:HGNC:9867]
ENSG00000087086	FTL	2.17781	1.5775e-05	0.00182216	19	48965301	48966878	ferritin light chain [Source:HGNC Symbol;Acc:HGNC:3999]
ENSG00000129151	BBOX1	2.17405	0.00036951	0.0160476	11	27040725	27127809	gamma-butyrobetaine hydroxylase 1 [Source:HGNC Symbol;Acc:HGNC:964]
ENSG00000263627	PPP4R1-AS1	2.16973	0.000847898	0.0261284	18	9615264	9619363	PPP4R1 antisense RNA 1 [Source:HGNC Symbol;Acc:HGNC:51112]
ENSG00000167964	RAB26	2.16891	0.00177523	0.0413025	16	2140803	2154165	RAB26, member RAS oncogene family [Source:HGNC Symbol;Acc:HGNC:14259]
ENSG00000170835	CEL	2.14768	0.000344771	0.0153378	9	133061978	133071861	carboxyl ester lipase [Source:HGNC Symbol;Acc:HGNC:1848]
ENSG00000143320	CRABP2	2.14579	9.15193e-07	0.000204604	1	156699606	156705816	cellular retinoic acid binding protein 2 [Source:HGNC Symbol;Acc:HGNC:2339]
ENSG00000081041	CXCL2	2.14131	0.00173419	0.0408859	4	74097035	74099293	C-X-C motif chemokine ligand 2 [Source:HGNC Symbol;Acc:HGNC:4603]
ENSG00000186204	CYP4F12	2.13942	7.44407e-05	0.00555763	19	15672757	15697174	cytochrome P450 family 4 subfamily F member 12 [Source:HGNC Symbol;Acc:HGNC:18857]
ENSG00000261150	EPPK1	2.1357	0.000960293	0.0283094	8	143857324	143878464	epiplakin 1 [Source:HGNC Symbol;Acc:HGNC:15577]
ENSG00000167183	PRR15L	2.13466	2.04101e-06	0.000374852	17	47951967	47957878	proline rich 15 like [Source:HGNC Symbol;Acc:HGNC:28149]
ENSG00000162069	BICDL2	2.12962	5.43408e-05	0.00437034	16	3027682	3036926	BICD family like cargo adaptor 2 [Source:HGNC Symbol;Acc:HGNC:33584]
ENSG00000234964	FABP5P7	2.11902	0.000550897	0.0202862	11	59781318	59781722	fatty acid binding protein 5 pseudogene 7 [Source:HGNC Symbol;Acc:HGNC:31070]
ENSG00000135083	CCNJL	2.11251	2.25628e-08	8.81676e-06	5	160251652	160345396	cyclin J like [Source:HGNC Symbol;Acc:HGNC:25876]
ENSG00000198125	MB	2.10998	3.08326e-07	8.32751e-05	22	35606764	35637951	myoglobin [Source:HGNC Symbol;Acc:HGNC:6915]
ENSG00000105289	TJP3	2.10645	0.0016425	0.0396702	19	3708109	3750813	tight junction protein 3 [Source:HGNC Symbol;Acc:HGNC:11829]
ENSG00000170458	CD14	2.10438	0.000923771	0.027453	5	140631728	140633701	CD14 molecule [Source:HGNC Symbol;Acc:HGNC:1628]
ENSG00000164120	HPGD	2.09903	0.000187213	0.0103254	4	174490177	174523154	hydroxyprostaglandin dehydrogenase 15-(NAD) [Source:HGNC Symbol;Acc:HGNC:5154]
ENSG00000136244	IL6	2.09026	7.44971e-08	2.35899e-05	7	22725884	22732002	interleukin 6 [Source:HGNC Symbol;Acc:HGNC:6018]
ENSG00000229951	FLJ31356	2.08979	0.000982612	0.028691	2	28384409	28394672	uncharacterized protein FLJ31356 [Source:EntrezGene;Acc:403150]
ENSG00000253417	LINC02159	2.08483	0.000453308	0.0181198	5	160931778	160938626	long intergenic non-protein coding RNA 2159 [Source:HGNC Symbol;Acc:HGNC:27749]
ENSG00000073756	PTGS2	2.07949	0.00101212	0.029364	1	186671791	186680427	prostaglandin-endoperoxide synthase 2 [Source:HGNC Symbol;Acc:HGNC:9605]
ENSG00000164867	NOS3	2.07701	6.16212e-09	3.09169e-06	7	150990995	151014588	nitric oxide synthase 3 [Source:HGNC Symbol;Acc:HGNC:7876]
ENSG00000224409	RP11-114B7.6	2.07021	0.00219849	0.0466791	1	32717734	32725237
ENSG00000165935	SMCO2	2.06363	0.00048556	0.0185625	12	27466810	27502185	single-pass membrane protein with coiled-coil domains 2 [Source:HGNC Symbol;Acc:HGNC:34448]
ENSG00000227591	RP1-28O10.1	2.04842	0.000821973	0.0258943	1	209661364	209724125
ENSG00000234678	ELF3-AS1	2.04457	0.00062609	0.0220283	1	202000094	202010353	ELF3 antisense RNA 1 [Source:HGNC Symbol;Acc:HGNC:40211]
ENSG00000125998	FAM83C	2.03871	0.0012519	0.0332259	20	35285731	35292401	family with sequence similarity 83 member C [Source:HGNC Symbol;Acc:HGNC:16121]
ENSG00000162552	WNT4	2.03736	0.000179331	0.0100778	1	22117305	22143969	Wnt family member 4 [Source:HGNC Symbol;Acc:HGNC:12783]
ENSG00000121316	PLBD1	2.03085	6.29027e-15	1.92545e-11	12	14503661	14568349	phospholipase B domain containing 1 [Source:HGNC Symbol;Acc:HGNC:26215]
ENSG00000130234	ACE2	2.01179	1.04274e-09	7.36575e-07	X	15561033	15602148	angiotensin I converting enzyme 2 [Source:HGNC Symbol;Acc:HGNC:13557]
ENSG00000167105	TMEM92	2.00436	0.000172532	0.0098502	17	50271406	50281485	transmembrane protein 92 [Source:HGNC Symbol;Acc:HGNC:26579]
ENSG00000149968	MMP3	1.9956	0.000500869	0.0190061	11	102835801	102843803	matrix metallopeptidase 3 [Source:HGNC Symbol;Acc:HGNC:7173]
ENSG00000273478	RP11-465N4.5	1.98708	0.000504989	0.0190836	1	201995696	201996352
ENSG00000279141	LINC01451	1.98503	5.69247e-05	0.00452588	9	136612024	136617181	long intergenic non-protein coding RNA 1451 [Source:HGNC Symbol;Acc:HGNC:48599]
ENSG00000163131	CTSS	1.97693	3.73347e-05	0.00329658	1	150730196	150765957	cathepsin S [Source:HGNC Symbol;Acc:HGNC:2545]
ENSG00000188820	FAM26F	1.97067	0.00113072	0.0313307	6	116461370	116463779	family with sequence similarity 26 member F [Source:HGNC Symbol;Acc:HGNC:33391]
ENSG00000204261	PSMB8-AS1	1.95734	1.14799e-07	3.45638e-05	6	32844086	32846495	PSMB8 antisense RNA 1 (head to head) [Source:HGNC Symbol;Acc:HGNC:39758]
ENSG00000181885	CLDN7	1.94753	0.000605481	0.0216347	17	7259903	7263983	claudin 7 [Source:HGNC Symbol;Acc:HGNC:2049]
ENSG00000197696	NMB	1.93672	1.25275e-06	0.000252834	15	84655129	84658563	neuromedin B [Source:HGNC Symbol;Acc:HGNC:7842]
ENSG00000117266	CDK18	1.92906	2.21773e-05	0.00225032	1	205504595	205532793	cyclin dependent kinase 18 [Source:HGNC Symbol;Acc:HGNC:8751]
ENSG00000205913	SRRM2-AS1	1.92507	0.00184075	0.0420489	16	2737076	2752600	SRRM2 antisense RNA 1 [Source:HGNC Symbol;Acc:HGNC:44162]
ENSG00000163207	IVL	1.91075	0.0012898	0.0338169	1	152908545	152911886	involucrin [Source:HGNC Symbol;Acc:HGNC:6187]
ENSG00000152475	ZNF837	1.91065	0.000344904	0.0153378	19	58367618	58381060	zinc finger protein 837 [Source:HGNC Symbol;Acc:HGNC:25164]
ENSG00000134827	TCN1	1.90934	0.00202688	0.0445427	11	59852800	59866575	transcobalamin 1 [Source:HGNC Symbol;Acc:HGNC:11652]
ENSG00000166126	AMN	1.89812	0.000721797	0.0241908	14	102922656	102933596	amnion associated transmembrane protein [Source:HGNC Symbol;Acc:HGNC:14604]
ENSG00000144119	C1QL2	1.89806	0.000825914	0.0259295	2	119156243	119158889	complement C1q like 2 [Source:HGNC Symbol;Acc:HGNC:24181]
ENSG00000153292	ADGRF1	1.87766	0.000323853	0.0147225	6	46997703	47042363	adhesion G protein-coupled receptor F1 [Source:HGNC Symbol;Acc:HGNC:18990]
ENSG00000132623	ANKEF1	1.87283	6.38444e-06	0.000948821	20	9986126	10058303	ankyrin repeat and EF-hand domain containing 1 [Source:HGNC Symbol;Acc:HGNC:15803]
ENSG00000182179	UBA7	1.86997	0.000685071	0.0234091	3	49805207	49813946	ubiquitin like modifier activating enzyme 7 [Source:HGNC Symbol;Acc:HGNC:12471]
ENSG00000175505	CLCF1	1.86938	0.000254297	0.0126343	11	67364168	67374177	cardiotrophin-like cytokine factor 1 [Source:HGNC Symbol;Acc:HGNC:17412]
ENSG00000179846	NKPD1	1.86083	0.00013646	0.00846698	19	45149750	45158737	NTPase KAP family P-loop domain containing 1 [Source:HGNC Symbol;Acc:HGNC:24739]
ENSG00000189051	RNF222	1.85849	0.00141169	0.03601	17	8390704	8397826	ring finger protein 222 [Source:HGNC Symbol;Acc:HGNC:34517]
ENSG00000175592	FOSL1	1.84802	7.30206e-07	0.000174168	11	65892049	65900573	FOS like 1, AP-1 transcription factor subunit [Source:HGNC Symbol;Acc:HGNC:13718]
ENSG00000119922	IFIT2	1.81542	0.000326765	0.0147817	10	89283694	89309276	interferon induced protein with tetratricopeptide repeats 2 [Source:HGNC Symbol;Acc:HGNC:5409]
ENSG00000267308	LINC01764	1.80567	0.00228254	0.0477462	19	15827045	15835853	long intergenic non-protein coding RNA 1764 [Source:HGNC Symbol;Acc:HGNC:52553]
ENSG00000125538	IL1B	1.80315	0.00176018	0.0413025	2	112829751	112836903	interleukin 1 beta [Source:HGNC Symbol;Acc:HGNC:5992]
ENSG00000256812	CAPNS2	1.80299	2.99225e-05	0.00277554	16	55566672	55567687	calpain small subunit 2 [Source:HGNC Symbol;Acc:HGNC:16371]
ENSG00000181019	NQO1	1.80276	0.000167356	0.00972678	16	69706996	69726951	NAD(P)H quinone dehydrogenase 1 [Source:HGNC Symbol;Acc:HGNC:2874]
ENSG00000258056	RP11-644F5.11	1.79893	0.00133028	0.0344111	12	55729104	55730852
ENSG00000173928	SWSAP1	1.79485	9.74045e-05	0.00677625	19	11374685	11376951	SWIM-type zinc finger 7 associated protein 1 [Source:HGNC Symbol;Acc:HGNC:26638]
ENSG00000064042	LIMCH1	1.78905	0.00213167	0.0457363	4	41359607	41700044	LIM and calponin homology domains 1 [Source:HGNC Symbol;Acc:HGNC:29191]
ENSG00000164488	DACT2	1.76429	0.000535896	0.0199026	6	168292830	168319754	dishevelled binding antagonist of beta catenin 2 [Source:HGNC Symbol;Acc:HGNC:21231]
ENSG00000227496	RP11-145A3.1	1.76087	0.000382356	0.0163691	1	225700604	225752243
ENSG00000268089	GABRQ	1.75908	0.000484785	0.0185625	X	152638183	152657534	gamma-aminobutyric acid type A receptor theta subunit [Source:HGNC Symbol;Acc:HGNC:14454]
ENSG00000269993	AF003625.3	1.73842	0.000699224	0.0236936	X	151182386	151182855
ENSG00000176920	FUT2	1.73726	0.000615353	0.0218599	19	48695971	48705950	fucosyltransferase 2 [Source:HGNC Symbol;Acc:HGNC:4013]
ENSG00000156510	HKDC1	1.73682	1.13372e-05	0.00142616	10	69220303	69267559	hexokinase domain containing 1 [Source:HGNC Symbol;Acc:HGNC:23302]
ENSG00000109101	FOXN1	1.73409	0.00155821	0.0383108	17	28506243	28538896	forkhead box N1 [Source:HGNC Symbol;Acc:HGNC:12765]
ENSG00000178934	LGALS7B	1.73293	4.30056e-07	0.000108197	19	38789211	38791749	galectin 7B [Source:HGNC Symbol;Acc:HGNC:34447]
ENSG00000119411	BSPRY	1.73063	0.00196308	0.0439146	9	113349541	113371233	B-box and SPRY domain containing [Source:HGNC Symbol;Acc:HGNC:18232]
ENSG00000165949	IFI27	1.72963	1.37751e-05	0.00163222	14	94104836	94116698	interferon alpha inducible protein 27 [Source:HGNC Symbol;Acc:HGNC:5397]
ENSG00000107984	DKK1	1.72895	0.000101693	0.00689187	10	52314296	52318042	dickkopf WNT signaling pathway inhibitor 1 [Source:HGNC Symbol;Acc:HGNC:2891]
ENSG00000166396	SERPINB7	1.72797	0.000121527	0.00777689	18	63752935	63805376	serpin family B member 7 [Source:HGNC Symbol;Acc:HGNC:13902]
ENSG00000106541	AGR2	1.72681	0.00144657	0.0365444	7	16791811	16833433	anterior gradient 2, protein disulphide isomerase family member [Source:HGNC Symbol;Acc:HGNC:328]
ENSG00000134802	SLC43A3	1.71584	2.98669e-05	0.00277554	11	57406954	57427580	solute carrier family 43 member 3 [Source:HGNC Symbol;Acc:HGNC:17466]
ENSG00000227467	LINC01537	1.71536	0.00119597	0.0323704	11	72570660	72573229	long intergenic non-protein coding RNA 1537 [Source:HGNC Symbol;Acc:HGNC:51301]
ENSG00000235954	TTC28-AS1	1.71453	0.000150912	0.00904441	22	27919376	28008581	TTC28 antisense RNA 1 [Source:HGNC Symbol;Acc:HGNC:29336]
ENSG00000174502	SLC26A9	1.70478	0.000374943	0.0161648	1	205913048	205943460	solute carrier family 26 member 9 [Source:HGNC Symbol;Acc:HGNC:14469]
ENSG00000149798	CDC42EP2	1.69667	0.00019127	0.0105176	11	65314818	65322429	CDC42 effector protein 2 [Source:HGNC Symbol;Acc:HGNC:16263]
ENSG00000262468	LINC01569	1.69124	0.000495254	0.018832	16	4245825	4253789	long intergenic non-protein coding RNA 1569 [Source:HGNC Symbol;Acc:HGNC:51380]
ENSG00000140044	JDP2	1.68986	0.000575253	0.0209625	14	75427716	75474111	Jun dimerization protein 2 [Source:HGNC Symbol;Acc:HGNC:17546]
ENSG00000225556	C2CD4D	1.68761	0.00202123	0.0445107	1	151837819	151840557	C2 calcium dependent domain containing 4D [Source:HGNC Symbol;Acc:HGNC:37210]
ENSG00000174428	GTF2IRD2B	1.67228	0.000103302	0.00694959	7	75092573	75149817	GTF2I repeat domain containing 2B [Source:HGNC Symbol;Acc:HGNC:33125]
ENSG00000108448	TRIM16L	1.66791	5.7056e-06	0.000866025	17	18697998	18736118	tripartite motif containing 16-like [Source:HGNC Symbol;Acc:HGNC:32670]
ENSG00000177191	B3GNT8	1.66306	7.52372e-05	0.00559436	19	41425359	41428730	UDP-GlcNAc:betaGal beta-1,3-N-acetylglucosaminyltransferase 8 [Source:HGNC Symbol;Acc:HGNC:24139]
ENSG00000237264	FTH1P11	1.66078	0.00116794	0.0318849	8	81521682	81522232	ferritin heavy chain 1 pseudogene 11 [Source:HGNC Symbol;Acc:HGNC:3981]
ENSG00000181649	PHLDA2	1.63847	0.00150625	0.0374848	11	2928273	2929455	pleckstrin homology like domain family A member 2 [Source:HGNC Symbol;Acc:HGNC:12385]
ENSG00000137880	GCHFR	1.63561	0.00137718	0.0352765	15	40764020	40767710	GTP cyclohydrolase I feedback regulator [Source:HGNC Symbol;Acc:HGNC:4194]
ENSG00000283000	RP11-297A16.4	1.62562	0.000133973	0.00839779	10	34969909	34975578
ENSG00000170454	KRT75	1.6254	0.000833089	0.0259593	12	52424070	52434525	keratin 75 [Source:HGNC Symbol;Acc:HGNC:24431]
ENSG00000172243	CLEC7A	1.62402	4.23508e-06	0.000676361	12	10116777	10130258	C-type lectin domain family 7 member A [Source:HGNC Symbol;Acc:HGNC:14558]
ENSG00000117407	ARTN	1.62271	2.34595e-06	0.000418307	1	43933320	43937241	artemin [Source:HGNC Symbol;Acc:HGNC:727]
ENSG00000186666	BCDIN3D	1.61849	0.00205153	0.0449086	12	49836039	49843129	BCDIN3 domain containing RNA methyltransferase [Source:HGNC Symbol;Acc:HGNC:27050]
ENSG00000196812	ZSCAN16	1.61716	0.000836977	0.0259661	6	28124560	28130082	zinc finger and SCAN domain containing 16 [Source:HGNC Symbol;Acc:HGNC:20813]
ENSG00000268129	RP11-91G21.1	1.60574	7.24417e-05	0.00543047	3	143000907	143001467
ENSG00000167772	ANGPTL4	1.60474	0.000303486	0.0141109	19	8363289	8374373	angiopoietin like 4 [Source:HGNC Symbol;Acc:HGNC:16039]
ENSG00000160111	CPAMD8	1.59682	0.000569201	0.0207832	19	16892947	17026815	C3 and PZP like, alpha-2-macroglobulin domain containing 8 [Source:HGNC Symbol;Acc:HGNC:23228]
ENSG00000158406	HIST1H4H	1.59601	0.000481703	0.0185625	6	26277609	26285638	histone cluster 1 H4 family member h [Source:HGNC Symbol;Acc:HGNC:4788]
ENSG00000169955	ZNF747	1.58949	0.00139626	0.0357156	16	30530367	30535347	zinc finger protein 747 [Source:HGNC Symbol;Acc:HGNC:28350]
ENSG00000136231	IGF2BP3	1.58738	7.96118e-05	0.00585207	7	23310209	23470467	insulin like growth factor 2 mRNA binding protein 3 [Source:HGNC Symbol;Acc:HGNC:28868]
ENSG00000111275	ALDH2	1.5832	5.07265e-06	0.000789528	12	111766887	111817529	aldehyde dehydrogenase 2 family (mitochondrial) [Source:HGNC Symbol;Acc:HGNC:404]
ENSG00000188372	ZP3	1.57371	0.000833235	0.0259593	7	76397518	76442071	zona pellucida glycoprotein 3 [Source:HGNC Symbol;Acc:HGNC:13189]
ENSG00000137331	IER3	1.57214	0.000444991	0.017962	6	30743199	30744554	immediate early response 3 [Source:HGNC Symbol;Acc:HGNC:5392]
ENSG00000198736	MSRB1	1.56641	3.46978e-05	0.00310859	16	1938210	1943326	methionine sulfoxide reductase B1 [Source:HGNC Symbol;Acc:HGNC:14133]
ENSG00000168077	SCARA3	1.5577	0.000300631	0.0140493	8	27633868	27676776	scavenger receptor class A member 3 [Source:HGNC Symbol;Acc:HGNC:19000]
ENSG00000183734	ASCL2	1.55501	0.00181909	0.0418141	11	2268495	2270952	achaete-scute family bHLH transcription factor 2 [Source:HGNC Symbol;Acc:HGNC:739]
ENSG00000016402	IL20RA	1.54778	5.44924e-05	0.00437034	6	136999971	137045180	interleukin 20 receptor subunit alpha [Source:HGNC Symbol;Acc:HGNC:6003]
ENSG00000157601	MX1	1.54059	0.00105181	0.0299963	21	41420304	41459214	MX dynamin like GTPase 1 [Source:HGNC Symbol;Acc:HGNC:7532]
ENSG00000100031	GGT1	1.54002	0.000945678	0.0280134	22	24583750	24629005	gamma-glutamyltransferase 1 [Source:HGNC Symbol;Acc:HGNC:4250]
ENSG00000187049	TMEM216	1.535	0.000206855	0.0111448	11	61391687	61398863	transmembrane protein 216 [Source:HGNC Symbol;Acc:HGNC:25018]
ENSG00000213977	TAX1BP3	1.52909	0.00107871	0.030617	17	3662896	3668682	Tax1 binding protein 3 [Source:HGNC Symbol;Acc:HGNC:30684]
ENSG00000145050	MANF	1.52374	0.000197922	0.0108036	3	51385047	51389397	mesencephalic astrocyte derived neurotrophic factor [Source:HGNC Symbol;Acc:HGNC:15461]
ENSG00000168907	PLA2G4F	1.51925	0.000486145	0.0185625	15	42139034	42156636	phospholipase A2 group IVF [Source:HGNC Symbol;Acc:HGNC:27396]
ENSG00000176024	ZNF613	1.51721	9.87075e-05	0.00680072	19	51927147	51948759	zinc finger protein 613 [Source:HGNC Symbol;Acc:HGNC:25827]
ENSG00000171984	C20orf196	1.51021	5.28693e-05	0.00433481	20	5750393	5863912	chromosome 20 open reading frame 196 [Source:HGNC Symbol;Acc:HGNC:26318]
ENSG00000241544	LINC02029	1.50954	0.000739862	0.0246165	3	157081841	157088547	long intergenic non-protein coding RNA 2029 [Source:HGNC Symbol;Acc:HGNC:52863]
ENSG00000120738	EGR1	1.50928	8.76142e-06	0.00117041	5	138465490	138469315	early growth response 1 [Source:HGNC Symbol;Acc:HGNC:3238]
ENSG00000171345	KRT19	1.50454	0.00232221	0.048432	17	41523617	41528308	keratin 19 [Source:HGNC Symbol;Acc:HGNC:6436]
ENSG00000196139	AKR1C3	1.49792	0.00129073	0.0338169	10	5035354	5107686	aldo-keto reductase family 1 member C3 [Source:HGNC Symbol;Acc:HGNC:386]
ENSG00000170634	ACYP2	1.48916	0.000685867	0.0234091	2	53970838	54305300	acylphosphatase 2 [Source:HGNC Symbol;Acc:HGNC:180]
ENSG00000167996	FTH1	1.48788	0.000900783	0.0270232	11	61959718	61967660	ferritin heavy chain 1 [Source:HGNC Symbol;Acc:HGNC:3976]
ENSG00000175193	PARL	1.48185	0.00104892	0.0299604	3	183829271	183884933	presenilin associated rhomboid like [Source:HGNC Symbol;Acc:HGNC:18253]
ENSG00000167985	SDHAF2	1.48083	0.000458498	0.018153	11	61430042	61447529	succinate dehydrogenase complex assembly factor 2 [Source:HGNC Symbol;Acc:HGNC:26034]
ENSG00000151651	ADAM8	1.48055	0.00115703	0.0317639	10	133262403	133276868	ADAM metallopeptidase domain 8 [Source:HGNC Symbol;Acc:HGNC:215]
ENSG00000185686	PRAME	1.48029	0.00163691	0.0396702	22	22547701	22559361	preferentially expressed antigen in melanoma [Source:HGNC Symbol;Acc:HGNC:9336]
ENSG00000172086	KRCC1	1.4754	1.27787e-05	0.00155426	2	88027205	88055729	lysine rich coiled-coil 1 [Source:HGNC Symbol;Acc:HGNC:28039]
ENSG00000136155	SCEL	1.47244	0.00164817	0.0396702	13	77535674	77645263	sciellin [Source:HGNC Symbol;Acc:HGNC:10573]
ENSG00000246067	RAB30-AS1	1.46632	0.000206924	0.0111448	11	83072066	83106719	RAB30 antisense RNA 1 (head to head) [Source:HGNC Symbol;Acc:HGNC:48672]
ENSG00000148926	ADM	1.45938	0.000757899	0.0248564	11	10304680	10307397	adrenomedullin [Source:HGNC Symbol;Acc:HGNC:259]
ENSG00000148175	STOM	1.45873	1.07538e-07	3.29174e-05	9	121338988	121370304	stomatin [Source:HGNC Symbol;Acc:HGNC:3383]
ENSG00000128228	SDF2L1	1.45873	0.000754941	0.0248037	22	21642261	21644298	stromal cell derived factor 2 like 1 [Source:HGNC Symbol;Acc:HGNC:10676]
ENSG00000235560	AC002310.12	1.45275	0.00062163	0.0219896	16	30534752	30537144
ENSG00000101335	MYL9	1.44759	0.000589873	0.0212008	20	36541484	36551447	myosin light chain 9 [Source:HGNC Symbol;Acc:HGNC:15754]
ENSG00000197417	SHPK	1.44481	0.000630519	0.0221224	17	3608262	3636322	sedoheptulokinase [Source:HGNC Symbol;Acc:HGNC:1492]
ENSG00000161011	SQSTM1	1.44241	2.03575e-05	0.00216119	5	179806398	179838078	sequestosome 1 [Source:HGNC Symbol;Acc:HGNC:11280]
ENSG00000153485	TMEM251	1.44229	0.00110895	0.0309926	14	93184951	93187089	transmembrane protein 251 [Source:HGNC Symbol;Acc:HGNC:20218]
ENSG00000175315	CST6	1.44183	0.00141677	0.0360892	11	66011841	66013505	cystatin E/M [Source:HGNC Symbol;Acc:HGNC:2478]
ENSG00000237149	ZNF503-AS2	1.44101	0.000164285	0.00958554	10	75401519	75408982	ZNF503 antisense RNA 2 [Source:HGNC Symbol;Acc:HGNC:23525]
ENSG00000081087	OSTM1	1.43742	2.32223e-06	0.000418138	6	108041409	108165854	osteopetrosis associated transmembrane protein 1 [Source:HGNC Symbol;Acc:HGNC:21652]
ENSG00000197568	HHLA3	1.4301	0.000175341	0.00993922	1	70354805	70385339	HERV-H LTR-associating 3 [Source:HGNC Symbol;Acc:HGNC:4906]
ENSG00000229619	MBNL1-AS1	1.42004	0.00176555	0.0413025	3	152262616	152269555	MBNL1 antisense RNA 1 [Source:HGNC Symbol;Acc:HGNC:44584]
ENSG00000269386	RAB11B-AS1	1.41922	0.00182411	0.0418528	19	8374373	8390685	RAB11B antisense RNA 1 [Source:HGNC Symbol;Acc:HGNC:44178]
ENSG00000164967	RPP25L	1.41621	0.000102685	0.0069335	9	34610486	34612104	ribonuclease P/MRP subunit p25 like [Source:HGNC Symbol;Acc:HGNC:19909]
ENSG00000229809	ZNF688	1.41179	7.49016e-07	0.000176365	16	30569346	30572734	zinc finger protein 688 [Source:HGNC Symbol;Acc:HGNC:30489]
ENSG00000117525	F3	1.39081	0.000714105	0.0240647	1	94529225	94541800	coagulation factor III, tissue factor [Source:HGNC Symbol;Acc:HGNC:3541]
ENSG00000138642	HERC6	1.38683	0.000599282	0.021455	4	88378739	88443111	HECT and RLD domain containing E3 ubiquitin protein ligase family member 6 [Source:HGNC Symbol;Acc:HGNC:26072]
ENSG00000136305	CIDEB	1.38273	0.00234921	0.0485873	14	24305096	24311430	cell death-inducing DFFA-like effector b [Source:HGNC Symbol;Acc:HGNC:1977]
ENSG00000080031	PTPRH	1.37953	0.000236178	0.0121844	19	55181248	55209506	protein tyrosine phosphatase, receptor type H [Source:HGNC Symbol;Acc:HGNC:9672]
ENSG00000117228	GBP1	1.37846	2.52953e-06	0.000446705	1	89052319	89065360	guanylate binding protein 1 [Source:HGNC Symbol;Acc:HGNC:4182]
ENSG00000282386	RP11-422P24.12	1.37684	0.00200639	0.0443678	1	153964361	153965070
ENSG00000106853	PTGR1	1.37301	0.000392597	0.0167068	9	111549722	111599855	prostaglandin reductase 1 [Source:HGNC Symbol;Acc:HGNC:18429]
ENSG00000108786	HSD17B1	1.35713	0.000475767	0.0185497	17	42549214	42555213	hydroxysteroid 17-beta dehydrogenase 1 [Source:HGNC Symbol;Acc:HGNC:5210]
ENSG00000119431	HDHD3	1.3543	3.81649e-06	0.000625837	9	113373419	113376999	haloacid dehalogenase like hydrolase domain containing 3 [Source:HGNC Symbol;Acc:HGNC:28171]
ENSG00000253276	CCDC71L	1.35408	0.00127523	0.0336506	7	106656765	106660996	coiled-coil domain containing 71-like [Source:HGNC Symbol;Acc:HGNC:26685]
ENSG00000095380	NANS	1.34554	0.00150994	0.0375257	9	98056739	98083075	N-acetylneuraminate synthase [Source:HGNC Symbol;Acc:HGNC:19237]
ENSG00000189366	ALG1L	1.34323	9.70346e-07	0.000209663	3	125929275	125937039	ALG1, chitobiosyldiphosphodolichol beta-mannosyltransferase like [Source:HGNC Symbol;Acc:HGNC:33721]
ENSG00000160213	CSTB	1.34124	9.41604e-05	0.00662586	21	43772511	43776445	cystatin B [Source:HGNC Symbol;Acc:HGNC:2482]
ENSG00000229544	NKX1-2	1.34119	0.00119909	0.032386	10	124445239	124450184	NK1 homeobox 2 [Source:HGNC Symbol;Acc:HGNC:31652]
ENSG00000235109	ZSCAN31	1.33889	0.00111861	0.0311278	6	28324693	28356271	zinc finger and SCAN domain containing 31 [Source:HGNC Symbol;Acc:HGNC:14097]
ENSG00000171346	KRT15	1.334	0.000484995	0.0185625	17	41513743	41522529	keratin 15 [Source:HGNC Symbol;Acc:HGNC:6421]
ENSG00000128039	SRD5A3	1.33005	3.07502e-06	0.000527811	4	55346109	55373096	steroid 5 alpha-reductase 3 [Source:HGNC Symbol;Acc:HGNC:25812]
ENSG00000125775	SDCBP2	1.32741	0.00240756	0.04946	20	1309909	1329239	syndecan binding protein 2 [Source:HGNC Symbol;Acc:HGNC:15756]
ENSG00000180346	TIGD2	1.32139	0.000208142	0.011145	4	89111500	89114899	tigger transposable element derived 2 [Source:HGNC Symbol;Acc:HGNC:18333]
ENSG00000178896	EXOSC4	1.31907	0.00243353	0.0498819	8	144078626	144080647	exosome component 4 [Source:HGNC Symbol;Acc:HGNC:18189]
ENSG00000138378	STAT4	1.31804	0.00140323	0.0358437	2	191029576	191151596	signal transducer and activator of transcription 4 [Source:HGNC Symbol;Acc:HGNC:11365]
ENSG00000135842	FAM129A	1.31755	0.000613833	0.0218482	1	184790724	184974550	family with sequence similarity 129 member A [Source:HGNC Symbol;Acc:HGNC:16784]
ENSG00000224984	RP11-524H19.2	1.31594	0.000663563	0.0228649	6	54840118	54840855
ENSG00000177854	TMEM187	1.31454	0.000258198	0.0127475	X	153972327	153983195	transmembrane protein 187 [Source:HGNC Symbol;Acc:HGNC:13705]
ENSG00000171222	SCAND1	1.30803	0.000607892	0.0216787	20	35953617	35959472	SCAN domain containing 1 [Source:HGNC Symbol;Acc:HGNC:10566]
ENSG00000127952	STYXL1	1.30573	0.000115886	0.0075474	7	75996338	76048004	serine/threonine/tyrosine interacting like 1 [Source:HGNC Symbol;Acc:HGNC:18165]
ENSG00000165795	NDRG2	1.30222	0.000801668	0.0256852	14	21016763	21070872	NDRG family member 2 [Source:HGNC Symbol;Acc:HGNC:14460]
ENSG00000213523	SRA1	1.30179	0.000632379	0.0221224	5	140537340	140558252	steroid receptor RNA activator 1 [Source:HGNC Symbol;Acc:HGNC:11281]
ENSG00000105137	SYDE1	1.29611	0.000809477	0.0256852	19	15107403	15114988	synapse defective Rho GTPase homolog 1 [Source:HGNC Symbol;Acc:HGNC:25824]
ENSG00000169583	CLIC3	1.28829	0.00234255	0.0485645	9	136994635	136996803	chloride intracellular channel 3 [Source:HGNC Symbol;Acc:HGNC:2064]
ENSG00000261183	RP11-532F12.5	1.2882	0.000622595	0.0219896	15	40835808	40844387
ENSG00000165879	FRAT1	1.28794	0.00164989	0.0396702	10	97319267	97321915	FRAT1, WNT signaling pathway regulator [Source:HGNC Symbol;Acc:HGNC:3944]
ENSG00000170345	FOS	1.28603	0.000313406	0.01446	14	75278774	75282230	Fos proto-oncogene, AP-1 transcription factor subunit [Source:HGNC Symbol;Acc:HGNC:3796]
ENSG00000261888	AC144831.1	1.28061	0.00104658	0.02994	17	83104255	83106910
ENSG00000205352	PRR13	1.2758	2.93357e-06	0.000508283	12	53441605	53446645	proline rich 13 [Source:HGNC Symbol;Acc:HGNC:24528]
ENSG00000111335	OAS2	1.27288	0.00164121	0.0396702	12	112978395	113011723	2'-5'-oligoadenylate synthetase 2 [Source:HGNC Symbol;Acc:HGNC:8087]
ENSG00000168275	COA6	1.27184	0.000809742	0.0256852	1	234373456	234384049	cytochrome c oxidase assembly factor 6 [Source:HGNC Symbol;Acc:HGNC:18025]
ENSG00000238142	RP11-108M9.4	1.26634	0.000110788	0.00729297	1	16888538	16889649
ENSG00000140307	GTF2A2	1.26629	0.000395283	0.0167068	15	59638062	59657541	general transcription factor IIA subunit 2 [Source:HGNC Symbol;Acc:HGNC:4647]
ENSG00000148426	PROSER2	1.26591	1.47374e-05	0.00172399	10	11823339	11872277	proline and serine rich 2 [Source:HGNC Symbol;Acc:HGNC:23728]
ENSG00000096080	MRPS18A	1.26076	0.000493661	0.0188103	6	43671303	43687791	mitochondrial ribosomal protein S18A [Source:HGNC Symbol;Acc:HGNC:14515]
ENSG00000140961	OSGIN1	1.25731	0.00170828	0.0404336	16	83948282	83966332	oxidative stress induced growth inhibitor 1 [Source:HGNC Symbol;Acc:HGNC:30093]
ENSG00000078487	ZCWPW1	1.24881	0.00101443	0.029364	7	100400826	100428992	zinc finger CW-type and PWWP domain containing 1 [Source:HGNC Symbol;Acc:HGNC:23486]
ENSG00000022567	SLC45A4	1.24859	6.81499e-06	0.000986391	8	141207166	141308305	solute carrier family 45 member 4 [Source:HGNC Symbol;Acc:HGNC:29196]
ENSG00000139629	GALNT6	1.24851	6.28668e-05	0.0049151	12	51351247	51392867	polypeptide N-acetylgalactosaminyltransferase 6 [Source:HGNC Symbol;Acc:HGNC:4128]
ENSG00000142235	LMTK3	1.24823	0.000651672	0.022603	19	48485271	48513189	lemur tyrosine kinase 3 [Source:HGNC Symbol;Acc:HGNC:19295]
ENSG00000181924	COA4	1.24651	3.36083e-06	0.000561137	11	73872667	73876988	cytochrome c oxidase assembly factor 4 homolog [Source:HGNC Symbol;Acc:HGNC:24604]
ENSG00000170899	GSTA4	1.24066	0.00084768	0.0261284	6	52977948	52995378	glutathione S-transferase alpha 4 [Source:HGNC Symbol;Acc:HGNC:4629]
ENSG00000079999	KEAP1	1.236	0.000182128	0.010146	19	10486120	10503741	kelch like ECH associated protein 1 [Source:HGNC Symbol;Acc:HGNC:23177]
ENSG00000151729	SLC25A4	1.23353	0.000729072	0.0243015	4	185143241	185150382	solute carrier family 25 member 4 [Source:HGNC Symbol;Acc:HGNC:10990]
ENSG00000173486	FKBP2	1.22571	0.000914607	0.0273133	11	64241003	64244132	FK506 binding protein 2 [Source:HGNC Symbol;Acc:HGNC:3718]
ENSG00000169403	PTAFR	1.22183	0.00190545	0.0430048	1	28147166	28193936	platelet activating factor receptor [Source:HGNC Symbol;Acc:HGNC:9582]
ENSG00000221926	TRIM16	1.21639	3.39909e-05	0.00307525	17	15627960	15684311	tripartite motif containing 16 [Source:HGNC Symbol;Acc:HGNC:17241]
ENSG00000116761	CTH	1.21467	0.00178199	0.0413755	1	70411218	70439851	cystathionine gamma-lyase [Source:HGNC Symbol;Acc:HGNC:2501]
ENSG00000176973	FAM89B	1.21417	0.00162674	0.0395216	11	65572349	65574198	family with sequence similarity 89 member B [Source:HGNC Symbol;Acc:HGNC:16708]
ENSG00000023445	BIRC3	1.20269	1.84351e-05	0.00202742	11	102317450	102339403	baculoviral IAP repeat containing 3 [Source:HGNC Symbol;Acc:HGNC:591]
ENSG00000130724	CHMP2A	1.20207	0.00105938	0.0301653	19	58551566	58555124	charged multivesicular body protein 2A [Source:HGNC Symbol;Acc:HGNC:30216]
ENSG00000138073	PREB	1.19811	3.06169e-05	0.00281155	2	27130756	27134675	prolactin regulatory element binding [Source:HGNC Symbol;Acc:HGNC:9356]
ENSG00000254842	RP11-890B15.2	1.19717	0.00108464	0.030617	11	130844191	130865561
ENSG00000126460	PRRG2	1.19568	0.000172604	0.0098502	19	49580646	49591015	proline rich and Gla domain 2 [Source:HGNC Symbol;Acc:HGNC:9470]
ENSG00000173894	CBX2	1.19362	0.000879852	0.0266656	17	79778132	79787983	chromobox 2 [Source:HGNC Symbol;Acc:HGNC:1552]
ENSG00000133985	TTC9	1.18893	0.00143147	0.0363127	14	70641787	70675360	tetratricopeptide repeat domain 9 [Source:HGNC Symbol;Acc:HGNC:20267]
ENSG00000256940	RP11-783K16.5	1.18674	0.00214355	0.0459374	11	64245964	64248217
ENSG00000242282	AC108488.4	1.18613	0.000746718	0.0247476	2	3531813	3536873
ENSG00000174516	PELI3	1.18611	0.000653968	0.022603	11	66466327	66477337	pellino E3 ubiquitin protein ligase family member 3 [Source:HGNC Symbol;Acc:HGNC:30010]
ENSG00000169976	SF3B5	1.18367	0.0021159	0.0456963	6	144094881	144095573	splicing factor 3b subunit 5 [Source:HGNC Symbol;Acc:HGNC:21083]
ENSG00000137806	NDUFAF1	1.18169	0.00148649	0.0371442	15	41387349	41402519	NADH:ubiquinone oxidoreductase complex assembly factor 1 [Source:HGNC Symbol;Acc:HGNC:18828]
ENSG00000235823	OLMALINC	1.17839	0.000105063	0.00699125	10	100373615	100383368	oligodendrocyte maturation-associated long intergenic non-coding RNA [Source:HGNC Symbol;Acc:HGNC:28060]
ENSG00000184903	IMMP2L	1.1771	0.00234281	0.0485645	7	110663051	111562517	inner mitochondrial membrane peptidase subunit 2 [Source:HGNC Symbol;Acc:HGNC:14598]
ENSG00000114395	CYB561D2	1.17223	8.1344e-07	0.000186745	3	50350695	50358460	cytochrome b561 family member D2 [Source:HGNC Symbol;Acc:HGNC:30253]
ENSG00000223797	ENTPD3-AS1	1.16753	0.00180416	0.041575	3	40313802	40453329	ENTPD3 antisense RNA 1 [Source:HGNC Symbol;Acc:HGNC:26710]
ENSG00000241468	ATP5J2	1.16725	0.000142959	0.00870636	7	99448475	99466331	ATP synthase, H+ transporting, mitochondrial Fo complex subunit F2 [Source:HGNC Symbol;Acc:HGNC:848]
ENSG00000175854	SWI5	1.16617	0.000225557	0.0117353	9	128275379	128288990	SWI5 homologous recombination repair protein [Source:HGNC Symbol;Acc:HGNC:31412]
ENSG00000105171	POP4	1.16499	0.000533147	0.0198616	19	29604017	29617237	POP4 homolog, ribonuclease P/MRP subunit [Source:HGNC Symbol;Acc:HGNC:30081]
ENSG00000076258	FMO4	1.16335	0.002089	0.0453748	1	171314208	171342084	flavin containing monooxygenase 4 [Source:HGNC Symbol;Acc:HGNC:3772]
ENSG00000129559	NEDD8	1.15458	0.000818563	0.0258756	14	24216852	24232454	neural precursor cell expressed, developmentally down-regulated 8 [Source:HGNC Symbol;Acc:HGNC:7732]
ENSG00000134809	TIMM10	1.1522	0.00145659	0.0367457	11	57528463	57530803	translocase of inner mitochondrial membrane 10 [Source:HGNC Symbol;Acc:HGNC:11814]
ENSG00000258199	RP11-977G19.5	1.15077	0.000481958	0.0185625	12	56162359	56190284
ENSG00000206337	HCP5	1.14652	3.25478e-05	0.00295927	6	31400702	31477506	HLA complex P5 (non-protein coding) [Source:HGNC Symbol;Acc:HGNC:21659]
ENSG00000165118	C9orf64	1.14578	0.000437907	0.017852	9	83938311	83956986	chromosome 9 open reading frame 64 [Source:HGNC Symbol;Acc:HGNC:28144]
ENSG00000155115	GTF3C6	1.14353	0.000871496	0.0265271	6	110958560	110967890	general transcription factor IIIC subunit 6 [Source:HGNC Symbol;Acc:HGNC:20872]
ENSG00000213699	SLC35F6	1.14203	0.000648868	0.0225703	2	26764284	26781231	solute carrier family 35 member F6 [Source:HGNC Symbol;Acc:HGNC:26055]
ENSG00000145194	ECE2	1.14181	0.00200256	0.0443678	3	184249650	184293031	endothelin converting enzyme 2 [Source:HGNC Symbol;Acc:HGNC:13275]
ENSG00000167969	ECI1	1.13966	4.54416e-07	0.000112781	16	2239395	2252300	enoyl-CoA delta isomerase 1 [Source:HGNC Symbol;Acc:HGNC:2703]
ENSG00000158747	NBL1	1.13668	0.000926576	0.0274919	1	19640554	19658456	neuroblastoma 1, DAN family BMP antagonist [Source:HGNC Symbol;Acc:HGNC:7650]
ENSG00000177700	POLR2L	1.1366	4.15621e-06	0.000673621	11	837356	842545	RNA polymerase II subunit L [Source:HGNC Symbol;Acc:HGNC:9199]
ENSG00000280832	ST3GAL4-AS1	1.13213	0.00102206	0.029468	11	126340889	126355587	ST3GAL4 antisense RNA 1 (head to head) [Source:HGNC Symbol;Acc:HGNC:48645]
ENSG00000068079	IFI35	1.13159	0.000359709	0.0157296	17	43006725	43014456	interferon induced protein 35 [Source:HGNC Symbol;Acc:HGNC:5399]
ENSG00000174469	CNTNAP2	1.12588	0.00172167	0.04067	7	146116002	148420998	contactin associated protein-like 2 [Source:HGNC Symbol;Acc:HGNC:13830]
ENSG00000142252	GEMIN7	1.12325	0.000901098	0.0270232	19	45079195	45091524	gem nuclear organelle associated protein 7 [Source:HGNC Symbol;Acc:HGNC:20045]
ENSG00000005243	COPZ2	1.11323	2.74582e-05	0.00259947	17	48026167	48038030	coatomer protein complex subunit zeta 2 [Source:HGNC Symbol;Acc:HGNC:19356]
ENSG00000246705	H2AFJ	1.11064	0.000142183	0.00870636	12	14774383	14778002	H2A histone family member J [Source:HGNC Symbol;Acc:HGNC:14456]
ENSG00000232533	AC093673.5	1.1106	4.40944e-05	0.00383809	7	143379692	143380495
ENSG00000241058	NSUN6	1.1088	0.00190247	0.0430048	10	18545561	18659285	NOP2/Sun RNA methyltransferase family member 6 [Source:HGNC Symbol;Acc:HGNC:23529]
ENSG00000196605	ZNF846	1.10673	0.000582021	0.0211253	19	9751993	9793180	zinc finger protein 846 [Source:HGNC Symbol;Acc:HGNC:27260]
ENSG00000143543	JTB	1.10571	0.000352194	0.0155117	1	153974269	153977688	jumping translocation breakpoint [Source:HGNC Symbol;Acc:HGNC:6201]
ENSG00000241553	ARPC4	1.10191	0.000222563	0.0116456	3	9792495	9807726	actin related protein 2/3 complex subunit 4 [Source:HGNC Symbol;Acc:HGNC:707]
ENSG00000170906	NDUFA3	1.09637	0.000451812	0.0181178	19	54102728	54109257	NADH:ubiquinone oxidoreductase subunit A3 [Source:HGNC Symbol;Acc:HGNC:7686]
ENSG00000176182	MYPOP	1.09391	0.000315543	0.01446	19	45890020	45902604	Myb related transcription factor, partner of profilin [Source:HGNC Symbol;Acc:HGNC:20178]
ENSG00000204922	UQCC3	1.09089	3.30368e-06	0.000556654	11	62670273	62673687	ubiquinol-cytochrome c reductase complex assembly factor 3 [Source:HGNC Symbol;Acc:HGNC:34399]
ENSG00000228300	C19orf24	1.08955	0.00043356	0.017774	19	1275438	1279249	chromosome 19 open reading frame 24 [Source:HGNC Symbol;Acc:HGNC:26073]
ENSG00000146425	DYNLT1	1.08767	0.00011173	0.00732866	6	158636474	158644739	dynein light chain Tctex-type 1 [Source:HGNC Symbol;Acc:HGNC:11697]
ENSG00000254901	BORCS8	1.0845	0.00111037	0.0309926	19	19176903	19192591	BLOC-1 related complex subunit 8 [Source:HGNC Symbol;Acc:HGNC:37247]
ENSG00000071655	MBD3	1.08217	0.00209012	0.0453748	19	1573596	1592801	methyl-CpG binding domain protein 3 [Source:HGNC Symbol;Acc:HGNC:6918]
ENSG00000162746	FCRLB	1.07897	0.00178721	0.041406	1	161721563	161728143	Fc receptor like B [Source:HGNC Symbol;Acc:HGNC:26431]
ENSG00000186222	BLOC1S4	1.07314	0.00178811	0.041406	4	6716055	6717671	biogenesis of lysosomal organelles complex 1 subunit 4 [Source:HGNC Symbol;Acc:HGNC:24206]
ENSG00000130021	PUDP	1.06983	0.00160793	0.0393227	X	7048920	7148190	pseudouridine 5'-phosphatase [Source:HGNC Symbol;Acc:HGNC:16818]
ENSG00000144115	THNSL2	1.06911	0.000362381	0.0158088	2	88170295	88186636	threonine synthase like 2 [Source:HGNC Symbol;Acc:HGNC:25602]
ENSG00000183978	COA3	1.06059	2.29827e-05	0.00229266	17	42795147	42798704	cytochrome c oxidase assembly factor 3 [Source:HGNC Symbol;Acc:HGNC:24990]
ENSG00000196569	LAMA2	1.0603	0.00234738	0.0485873	6	128883141	129516569	laminin subunit alpha 2 [Source:HGNC Symbol;Acc:HGNC:6482]
ENSG00000095794	CREM	1.05137	0.00058403	0.0211434	10	35126791	35212958	cAMP responsive element modulator [Source:HGNC Symbol;Acc:HGNC:2352]
ENSG00000136870	ZNF189	1.05126	0.00040117	0.0168601	9	101398873	101410660	zinc finger protein 189 [Source:HGNC Symbol;Acc:HGNC:12980]
ENSG00000130066	SAT1	1.05089	0.00124802	0.0331711	X	23783173	23786226	spermidine/spermine N1-acetyltransferase 1 [Source:HGNC Symbol;Acc:HGNC:10540]
ENSG00000255517	CTD-3074O7.5	1.04884	0.000552275	0.0202862	11	66473490	66480233
ENSG00000103024	NME3	1.04839	5.07532e-05	0.0042178	16	1770286	1771730	NME/NM23 nucleoside diphosphate kinase 3 [Source:HGNC Symbol;Acc:HGNC:7851]
ENSG00000114378	HYAL1	1.04786	0.00196819	0.043922	3	50299889	50312381	hyaluronoglucosaminidase 1 [Source:HGNC Symbol;Acc:HGNC:5320]
ENSG00000108423	TUBD1	1.04294	0.00131341	0.0342768	17	59859482	59892945	tubulin delta 1 [Source:HGNC Symbol;Acc:HGNC:16811]
ENSG00000121851	POLR3GL	1.0354	0.000454263	0.0181198	1	145964702	145978848	RNA polymerase III subunit G like [Source:HGNC Symbol;Acc:HGNC:28466]
ENSG00000064490	RFXANK	1.03262	0.00151784	0.0376203	19	19192229	19201869	regulatory factor X associated ankyrin containing protein [Source:HGNC Symbol;Acc:HGNC:9987]
ENSG00000242485	MRPL20	1.03216	0.00131349	0.0342768	1	1401908	1407313	mitochondrial ribosomal protein L20 [Source:HGNC Symbol;Acc:HGNC:14478]
ENSG00000272831	RP11-792A8.4	1.02965	1.97626e-05	0.00212578	7	66739829	66740385
ENSG00000007255	TRAPPC6A	1.02684	0.000182304	0.010146	19	45162928	45178237	trafficking protein particle complex 6A [Source:HGNC Symbol;Acc:HGNC:23069]
ENSG00000183172	SMDT1	1.02182	0.00116458	0.0318757	22	42079691	42084284	single-pass membrane protein with aspartate rich tail 1 [Source:HGNC Symbol;Acc:HGNC:25055]
ENSG00000176678	FOXL1	1.02078	0.000457357	0.018153	16	86576368	86582160	forkhead box L1 [Source:HGNC Symbol;Acc:HGNC:3817]
ENSG00000198937	CCDC167	1.01967	6.82461e-05	0.00520086	6	37482920	37499922	coiled-coil domain containing 167 [Source:HGNC Symbol;Acc:HGNC:21239]
ENSG00000173540	GMPPB	1.01932	0.000240811	0.0122854	3	49716844	49723951	GDP-mannose pyrophosphorylase B [Source:HGNC Symbol;Acc:HGNC:22932]
ENSG00000163344	PMVK	1.01861	0.0011127	0.0310103	1	154924734	154936991	phosphomevalonate kinase [Source:HGNC Symbol;Acc:HGNC:9141]
ENSG00000120885	CLU	1.01849	0.00207576	0.0452236	8	27596917	27615031	clusterin [Source:HGNC Symbol;Acc:HGNC:2095]
ENSG00000183648	NDUFB1	1.01769	0.00132943	0.0344111	14	92116122	92121917	NADH:ubiquinone oxidoreductase subunit B1 [Source:HGNC Symbol;Acc:HGNC:7695]
ENSG00000240065	PSMB9	1.01043	0.00135881	0.0349523	6	32844136	32859585	proteasome subunit beta 9 [Source:HGNC Symbol;Acc:HGNC:9546]
ENSG00000119878	CRIPT	1.00893	0.00127787	0.0336719	2	46616416	46625742	CXXC repeat containing interactor of PDZ3 domain [Source:HGNC Symbol;Acc:HGNC:14312]
ENSG00000176396	EID2	1.00516	0.000316764	0.01446	19	39538705	39540333	EP300 interacting inhibitor of differentiation 2 [Source:HGNC Symbol;Acc:HGNC:28292]
ENSG00000075131	TIPIN	1.00311	0.00239729	0.0493042	15	66336206	66386746	TIMELESS interacting protein [Source:HGNC Symbol;Acc:HGNC:30750]
ENSG00000179743	FLJ37453	1.00221	0.00158033	0.0386992	1	15834474	15848147	uncharacterized LOC729614 [Source:EntrezGene;Acc:729614]
ENSG00000136048	DRAM1	1.00092	0.00147326	0.0369644	12	101877351	102012130	DNA damage regulated autophagy modulator 1 [Source:HGNC Symbol;Acc:HGNC:25645]

## Sheet: GefR vs Control SCC16-PDX DOWN
Supplementary Table S1: Genes with downregulated expression in GefR SCC16-PDX vs Control SCC16-PDX (padj<0.05; FC>2)
ID	Gene Symbol	log2 Fold Change GefR vs Control SCC16-PDX	pvalue GefR vs Control SCC16-PDX	padj GefR vs Control SCC16-PDX	chromosome name	start position	end position	description
ENSG00000234444	ZNF736	-5.3264	2.56769e-19	4.71581e-15	7	64307459	64354860	zinc finger protein 736 [Source:HGNC Symbol;Acc:HGNC:32467]
ENSG00000234405	LL0XNC01-250H12.3	-4.81686	0.000325912	0.0147795	X	103497523	103500317
ENSG00000118785	SPP1	-4.44449	2.0511e-11	2.21591e-08	4	87975650	87983426	secreted phosphoprotein 1 [Source:HGNC Symbol;Acc:HGNC:11255]
ENSG00000146666	LINC00525	-4.21608	1.11947e-05	0.00141795	7	47761476	47766772	long intergenic non-protein coding RNA 525 [Source:HGNC Symbol;Acc:HGNC:40290]
ENSG00000059804	SLC2A3	-4.18586	1.86773e-14	4.90038e-11	12	7919230	7936275	solute carrier family 2 member 3 [Source:HGNC Symbol;Acc:HGNC:11007]
ENSG00000253660	CTC-353G13.1	-3.92129	2.62041e-05	0.00251971	5	167937717	167953469
ENSG00000125798	FOXA2	-3.47349	0.000172698	0.0098502	20	22581005	22585455	forkhead box A2 [Source:HGNC Symbol;Acc:HGNC:5022]
ENSG00000163915	IGF2BP2-AS1	-3.25481	0.000442105	0.0178848	3	185712528	185729787	IGF2BP2 antisense RNA 1 [Source:HGNC Symbol;Acc:HGNC:32674]
ENSG00000147614	ATP6V0D2	-3.19463	1.1701e-07	3.46613e-05	8	85987323	86154228	ATPase H+ transporting V0 subunit d2 [Source:HGNC Symbol;Acc:HGNC:18266]
ENSG00000244128	LINC01322	-3.18879	3.08407e-09	1.88807e-06	3	165206960	165655423	long intergenic non-protein coding RNA 1322 [Source:HGNC Symbol;Acc:HGNC:50528]
ENSG00000184113	CLDN5	-3.07577	0.00142681	0.0362925	22	19523024	19527545	claudin 5 [Source:HGNC Symbol;Acc:HGNC:2047]
ENSG00000181690	PLAG1	-3.05315	2.77207e-09	1.75558e-06	8	56160904	56211324	PLAG1 zinc finger [Source:HGNC Symbol;Acc:HGNC:9045]
ENSG00000204866	IGFL2	-2.95245	5.13256e-17	4.22989e-13	19	46143106	46161299	IGF like family member 2 [Source:HGNC Symbol;Acc:HGNC:32929]
ENSG00000172578	KLHL6	-2.94089	0.000184713	0.0102182	3	183487531	183555689	kelch like family member 6 [Source:HGNC Symbol;Acc:HGNC:18653]
ENSG00000158258	CLSTN2	-2.66449	1.47696e-16	6.78146e-13	3	139935185	140577397	calsyntenin 2 [Source:HGNC Symbol;Acc:HGNC:17448]
ENSG00000174640	SLCO2A1	-2.56429	8.21285e-05	0.0059856	3	133932696	134052184	solute carrier organic anion transporter family member 2A1 [Source:HGNC Symbol;Acc:HGNC:10955]
ENSG00000102575	ACP5	-2.55211	2.73727e-06	0.000478787	19	11574660	11579008	acid phosphatase 5, tartrate resistant [Source:HGNC Symbol;Acc:HGNC:124]
ENSG00000117707	PROX1	-2.51976	5.75236e-09	3.06303e-06	1	213983181	214041502	prospero homeobox 1 [Source:HGNC Symbol;Acc:HGNC:9459]
ENSG00000174827	PDZK1	-2.46687	0.00161971	0.0395054	1	145670852	145708148	PDZ domain containing 1 [Source:HGNC Symbol;Acc:HGNC:8821]
ENSG00000005381	MPO	-2.45325	0.00135822	0.0349523	17	58269856	58280935	myeloperoxidase [Source:HGNC Symbol;Acc:HGNC:7218]
ENSG00000080854	IGSF9B	-2.34947	0.0016743	0.0399354	11	133908564	133956985	immunoglobulin superfamily member 9B [Source:HGNC Symbol;Acc:HGNC:32326]
ENSG00000117020	AKT3	-2.34886	1.67487e-06	0.000315285	1	243488233	243851079	AKT serine/threonine kinase 3 [Source:HGNC Symbol;Acc:HGNC:393]
ENSG00000165757	KIAA1462	-2.32778	0.000198237	0.0108036	10	30012800	30115494	KIAA1462 [Source:HGNC Symbol;Acc:HGNC:29283]
ENSG00000234645	YWHAEP5	-2.32006	0.00115523	0.0317618	2	138288029	138288793	tyrosine 3-monooxygenase/tryptophan 5-monooxygenase activation protein epsilon pseudogene 5 [Source:HGNC Symbol;Acc:HGNC:49439]
ENSG00000231307	RPS3P2	-2.29864	0.00212268	0.0457037	20	38537758	38538458	ribosomal protein S3 pseudogene 2 [Source:HGNC Symbol;Acc:HGNC:16603]
ENSG00000227051	C14orf132	-2.28695	5.23126e-12	7.39056e-09	14	96039324	96093889	chromosome 14 open reading frame 132 [Source:HGNC Symbol;Acc:HGNC:20346]
ENSG00000280237	MIR4697HG	-2.2783	8.79432e-06	0.00117041	11	133896438	133901601	MIR4697 host gene [Source:HGNC Symbol;Acc:HGNC:27448]
ENSG00000105376	ICAM5	-2.25674	2.27736e-05	0.00228557	19	10289981	10296778	intercellular adhesion molecule 5 [Source:HGNC Symbol;Acc:HGNC:5348]
ENSG00000182492	BGN	-2.24797	0.000168895	0.00978526	X	153494939	153509554	biglycan [Source:HGNC Symbol;Acc:HGNC:1044]
ENSG00000276107	CTD-2033D15.2	-2.22569	5.30134e-06	0.000817239	15	39586561	39587293
ENSG00000248858	FLJ46284	-2.19857	0.00125697	0.0333124	8	92699742	92879502	uncharacterized LOC441369 [Source:EntrezGene;Acc:441369]
ENSG00000183914	DNAH2	-2.19449	0.000445998	0.0179631	17	7717354	7833744	dynein axonemal heavy chain 2 [Source:HGNC Symbol;Acc:HGNC:2948]
ENSG00000273353	CTA-268H5.12	-2.17766	0.00124	0.0330771	22	45178990	45179310
ENSG00000166897	ELFN2	-2.1758	0.000151676	0.00904441	22	37367960	37427470	extracellular leucine rich repeat and fibronectin type III domain containing 2 [Source:HGNC Symbol;Acc:HGNC:29396]
ENSG00000243406	MRPS31P5	-2.15358	0.00124089	0.0330771	13	52167709	52194465	mitochondrial ribosomal protein S31 pseudogene 5 [Source:HGNC Symbol;Acc:HGNC:39253]
ENSG00000005249	PRKAR2B	-2.14751	0.000805641	0.0256852	7	107044649	107161811	protein kinase cAMP-dependent type II regulatory subunit beta [Source:HGNC Symbol;Acc:HGNC:9392]
ENSG00000038427	VCAN	-2.08258	3.69896e-09	2.12297e-06	5	83471465	83582303	versican [Source:HGNC Symbol;Acc:HGNC:2464]
ENSG00000113140	SPARC	-2.07425	0.000273004	0.0131947	5	151661096	151687165	secreted protein acidic and cysteine rich [Source:HGNC Symbol;Acc:HGNC:11219]
ENSG00000186340	THBS2	-2.07345	0.000796721	0.0256308	6	169215780	169254044	thrombospondin 2 [Source:HGNC Symbol;Acc:HGNC:11786]
ENSG00000130948	HSD17B3	-2.04774	2.8891e-08	1.08288e-05	9	96235306	96302152	hydroxysteroid 17-beta dehydrogenase 3 [Source:HGNC Symbol;Acc:HGNC:5212]
ENSG00000188624	IGFL3	-2.04695	0.000564031	0.0206355	19	46120071	46124674	IGF like family member 3 [Source:HGNC Symbol;Acc:HGNC:32930]
ENSG00000236337	FMR1-IT1	-1.98124	0.00090195	0.0270232	X	147946941	147947583	FMR1 intronic transcript 1 [Source:HGNC Symbol;Acc:HGNC:41333]
ENSG00000231948	HS1BP3-IT1	-1.97279	1.67564e-05	0.00188802	2	20590775	20592548	HS1BP3 intronic transcript 1 [Source:HGNC Symbol;Acc:HGNC:41474]
ENSG00000198743	SLC5A3	-1.93905	1.12914e-06	0.000233009	21	34073570	34106262	solute carrier family 5 member 3 [Source:HGNC Symbol;Acc:HGNC:11038]
ENSG00000227076	RP11-4C20.4	-1.93401	0.0019739	0.0439425	10	127934698	127936167
ENSG00000163520	FBLN2	-1.87196	0.000285767	0.0135969	3	13549131	13638422	fibulin 2 [Source:HGNC Symbol;Acc:HGNC:3601]
ENSG00000069702	TGFBR3	-1.82926	1.29839e-05	0.00156698	1	91680343	91906335	transforming growth factor beta receptor 3 [Source:HGNC Symbol;Acc:HGNC:11774]
ENSG00000232774	FLJ22447	-1.81001	3.88207e-08	1.37112e-05	14	61570540	61658696	uncharacterized LOC400221 [Source:EntrezGene;Acc:400221]
ENSG00000134323	MYCN	-1.80378	2.61841e-05	0.00251971	2	15940564	15947007	v-myc avian myelocytomatosis viral oncogene neuroblastoma derived homolog [Source:HGNC Symbol;Acc:HGNC:7559]
ENSG00000012171	SEMA3B	-1.79642	0.000164404	0.00958554	3	50267558	50277546	semaphorin 3B [Source:HGNC Symbol;Acc:HGNC:10724]
ENSG00000139625	MAP3K12	-1.79282	0.00114117	0.0314696	12	53479669	53500063	mitogen-activated protein kinase kinase kinase 12 [Source:HGNC Symbol;Acc:HGNC:6851]
ENSG00000204262	COL5A2	-1.77729	0.00162517	0.0395216	2	189031896	189179879	collagen type V alpha 2 chain [Source:HGNC Symbol;Acc:HGNC:2210]
ENSG00000104219	ZDHHC2	-1.76212	0.000315432	0.01446	8	17156029	17224799	zinc finger DHHC-type containing 2 [Source:HGNC Symbol;Acc:HGNC:18469]
ENSG00000153071	DAB2	-1.74407	7.71546e-06	0.00107491	5	39371675	39462300	DAB2, clathrin adaptor protein [Source:HGNC Symbol;Acc:HGNC:2662]
ENSG00000260290	CTD-2033A16.2	-1.73562	0.00169576	0.0402382	16	69756536	69757937
ENSG00000261395	HSPE1P5	-1.72087	0.00226337	0.0475213	16	68686399	68686670	heat shock protein family E (Hsp10) member 1 pseudogene 5 [Source:HGNC Symbol;Acc:HGNC:49324]
ENSG00000275131	CH17-472G23.4	-1.70658	1.77971e-05	0.00197895	1	120489860	120701289
ENSG00000226029	LINC01772	-1.69454	8.12476e-09	3.82613e-06	1	16460948	16468481	long intergenic non-protein coding RNA 1772 [Source:HGNC Symbol;Acc:HGNC:52562]
ENSG00000106688	SLC1A1	-1.68679	0.00014458	0.00871702	9	4490444	4587469	solute carrier family 1 member 1 [Source:HGNC Symbol;Acc:HGNC:10939]
ENSG00000167550	RHEBL1	-1.67809	5.88924e-05	0.00466215	12	49064685	49070025	Ras homolog enriched in brain like 1 [Source:HGNC Symbol;Acc:HGNC:21166]
ENSG00000215158	RP11-1023L17.1	-1.64108	2.31612e-06	0.000418138	5	34164698	34244796
ENSG00000182272	B4GALNT4	-1.61211	0.00068727	0.0234091	11	369796	382116	beta-1,4-N-acetyl-galactosaminyltransferase 4 [Source:HGNC Symbol;Acc:HGNC:26315]
ENSG00000064300	NGFR	-1.6075	0.000124783	0.0079575	17	49495293	49515017	nerve growth factor receptor [Source:HGNC Symbol;Acc:HGNC:7809]
ENSG00000279145	RP11-547D13.1	-1.60007	0.000213138	0.0113136	15	55171972	55178175
ENSG00000240764	PCDHGC5	-1.59355	0.000589831	0.0212008	5	141489121	141512979	protocadherin gamma subfamily C, 5 [Source:HGNC Symbol;Acc:HGNC:8718]
ENSG00000243244	STON1	-1.58835	9.02052e-09	4.04075e-06	2	48529383	48598513	stonin 1 [Source:HGNC Symbol;Acc:HGNC:17003]
ENSG00000218418	RP11-296E7.1	-1.58748	0.00126717	0.0335344	6	80064286	80070199
ENSG00000161791	FMNL3	-1.56776	1.18143e-05	0.00145625	12	49636499	49708165	formin like 3 [Source:HGNC Symbol;Acc:HGNC:23698]
ENSG00000149948	HMGA2	-1.55648	0.000134829	0.00842271	12	65824131	65966295	high mobility group AT-hook 2 [Source:HGNC Symbol;Acc:HGNC:5009]
ENSG00000171617	ENC1	-1.53881	0.000260458	0.0127903	5	74627406	74641424	ectodermal-neural cortex 1 [Source:HGNC Symbol;Acc:HGNC:3345]
ENSG00000076641	PAG1	-1.53039	0.000503848	0.0190797	8	80967810	81112068	phosphoprotein membrane anchor with glycosphingolipid microdomains 1 [Source:HGNC Symbol;Acc:HGNC:30043]
ENSG00000133067	LGR6	-1.52672	0.0016624	0.0397548	1	202193901	202319781	leucine rich repeat containing G protein-coupled receptor 6 [Source:HGNC Symbol;Acc:HGNC:19719]
ENSG00000167601	AXL	-1.51428	0.000636804	0.0221927	19	41219203	41261766	AXL receptor tyrosine kinase [Source:HGNC Symbol;Acc:HGNC:905]
ENSG00000153558	FBXL2	-1.47541	6.82085e-06	0.000986391	3	33277025	33403662	F-box and leucine rich repeat protein 2 [Source:HGNC Symbol;Acc:HGNC:13598]
ENSG00000106366	SERPINE1	-1.47435	2.65809e-08	1.01705e-05	7	101127089	101139266	serpin family E member 1 [Source:HGNC Symbol;Acc:HGNC:8583]
ENSG00000266088	RP5-1028K7.2	-1.46919	0.000420652	0.0174395	17	40517026	40527002
ENSG00000277687	RP11-427L15.2	-1.45448	0.00124293	0.0330837	10	118692361	118693535
ENSG00000138735	PDE5A	-1.44437	0.00162683	0.0395216	4	119494395	119628991	phosphodiesterase 5A [Source:HGNC Symbol;Acc:HGNC:8784]
ENSG00000137962	ARHGAP29	-1.4418	0.00118438	0.0321779	1	94148988	94275068	Rho GTPase activating protein 29 [Source:HGNC Symbol;Acc:HGNC:30207]
ENSG00000132932	ATP8A2	-1.43695	7.37075e-08	2.35899e-05	13	25372071	26025851	ATPase phospholipid transporting 8A2 [Source:HGNC Symbol;Acc:HGNC:13533]
ENSG00000196369	SRGAP2B	-1.4331	0.000357953	0.0156901	1	144887265	145095528	SLIT-ROBO Rho GTPase activating protein 2B [Source:HGNC Symbol;Acc:HGNC:35237]
ENSG00000101670	LIPG	-1.42156	4.12282e-07	0.000105166	18	49560699	49599182	lipase G, endothelial type [Source:HGNC Symbol;Acc:HGNC:6623]
ENSG00000074590	NUAK1	-1.418	1.09569e-06	0.000231595	12	106063340	106140033	NUAK family kinase 1 [Source:HGNC Symbol;Acc:HGNC:14311]
ENSG00000026025	VIM	-1.4036	0.000302801	0.0141109	10	17228259	17237593	vimentin [Source:HGNC Symbol;Acc:HGNC:12692]
ENSG00000271862	RP11-343L5.2	-1.40104	0.000512599	0.0193167	5	83049376	83050964
ENSG00000174672	BRSK2	-1.38885	0.00131389	0.0342768	11	1389899	1462689	BR serine/threonine kinase 2 [Source:HGNC Symbol;Acc:HGNC:11405]
ENSG00000120278	PLEKHG1	-1.38048	0.000277354	0.0133348	6	150599883	150843665	pleckstrin homology and RhoGEF domain containing G1 [Source:HGNC Symbol;Acc:HGNC:20884]
ENSG00000137819	PAQR5	-1.37531	1.72027e-06	0.000319135	15	69298947	69407780	progestin and adipoQ receptor family member 5 [Source:HGNC Symbol;Acc:HGNC:29645]
ENSG00000196368	NUDT11	-1.37022	0.00167048	0.0398959	X	51490011	51496596	nudix hydrolase 11 [Source:HGNC Symbol;Acc:HGNC:18011]
ENSG00000181104	F2R	-1.36507	5.77542e-06	0.000869438	5	76716043	76735781	coagulation factor II thrombin receptor [Source:HGNC Symbol;Acc:HGNC:3537]
ENSG00000260917	RP11-57H14.4	-1.36376	0.00132572	0.0344111	10	112823490	112827726
ENSG00000237892	KLF7-IT1	-1.36178	0.000679398	0.0233083	2	207120884	207122044	KLF7 intronic transcript 1 [Source:HGNC Symbol;Acc:HGNC:41355]
ENSG00000177173	NAP1L4P1	-1.3616	0.00176711	0.0413025	1	116532936	116534092	nucleosome assembly protein 1 like 4 pseudogene 1 [Source:HGNC Symbol;Acc:HGNC:39740]
ENSG00000239264	TXNDC5	-1.35903	0.000624127	0.0220014	6	7881517	7910814	thioredoxin domain containing 5 [Source:HGNC Symbol;Acc:HGNC:21073]
ENSG00000148680	HTR7	-1.35235	3.21648e-07	8.56142e-05	10	90740823	90857698	5-hydroxytryptamine receptor 7 [Source:HGNC Symbol;Acc:HGNC:5302]
ENSG00000158555	GDPD5	-1.35048	0.0010634	0.0302328	11	75434640	75525903	glycerophosphodiester phosphodiesterase domain containing 5 [Source:HGNC Symbol;Acc:HGNC:28804]
ENSG00000174130	TLR6	-1.34122	0.0014366	0.0363925	4	38823715	38856817	toll like receptor 6 [Source:HGNC Symbol;Acc:HGNC:16711]
ENSG00000137872	SEMA6D	-1.34079	0.000125959	0.00800471	15	47184101	47774223	semaphorin 6D [Source:HGNC Symbol;Acc:HGNC:16770]
ENSG00000164327	RICTOR	-1.3403	5.63149e-05	0.00449687	5	38937919	39074408	RPTOR independent companion of MTOR complex 2 [Source:HGNC Symbol;Acc:HGNC:28611]
ENSG00000279342	RP11-677M14.8	-1.33772	0.00232324	0.048432	11	124789240	124792818
ENSG00000142677	IL22RA1	-1.33757	1.07282e-05	0.00137787	1	24119771	24143121	interleukin 22 receptor subunit alpha 1 [Source:HGNC Symbol;Acc:HGNC:13700]
ENSG00000276386	CNTNAP3P2	-1.33616	0.000395701	0.0167068	9	67059560	67293468	contactin associated protein-like 3 pseudogene 2 [Source:HGNC Symbol;Acc:HGNC:49589]
ENSG00000010295	IFFO1	-1.32292	0.000764389	0.02498	12	6538375	6556083	intermediate filament family orphan 1 [Source:HGNC Symbol;Acc:HGNC:24970]
ENSG00000053747	LAMA3	-1.31728	0.00136082	0.034955	18	23689443	23955066	laminin subunit alpha 3 [Source:HGNC Symbol;Acc:HGNC:6483]
ENSG00000171943	SRGAP2C	-1.30843	0.000239349	0.0122622	1	121184810	121392822	SLIT-ROBO Rho GTPase activating protein 2C [Source:HGNC Symbol;Acc:HGNC:30584]
ENSG00000131791	PRKAB2	-1.30557	2.76702e-05	0.0026061	1	147155106	147172550	protein kinase AMP-activated non-catalytic subunit beta 2 [Source:HGNC Symbol;Acc:HGNC:9379]
ENSG00000096968	JAK2	-1.29235	0.000104098	0.00695221	9	4984390	5128183	Janus kinase 2 [Source:HGNC Symbol;Acc:HGNC:6192]
ENSG00000114948	ADAM23	-1.28464	0.000144762	0.00871702	2	206443539	206621130	ADAM metallopeptidase domain 23 [Source:HGNC Symbol;Acc:HGNC:202]
ENSG00000177707	NECTIN3	-1.28447	0.000411977	0.0171573	3	111070071	111275563	nectin cell adhesion molecule 3 [Source:HGNC Symbol;Acc:HGNC:17664]
ENSG00000230532	AC091133.1	-1.27639	0.000796409	0.0256308	17	48931791	48937100
ENSG00000169155	ZBTB43	-1.26567	0.00089773	0.0270232	9	126805006	126838210	zinc finger and BTB domain containing 43 [Source:HGNC Symbol;Acc:HGNC:17908]
ENSG00000020577	SAMD4A	-1.2608	1.53424e-07	4.40278e-05	14	54567097	54793315	sterile alpha motif domain containing 4A [Source:HGNC Symbol;Acc:HGNC:23023]
ENSG00000128881	TTBK2	-1.2598	0.000751742	0.0247476	15	42738734	42920809	tau tubulin kinase 2 [Source:HGNC Symbol;Acc:HGNC:19141]
ENSG00000113161	HMGCR	-1.25788	2.08501e-07	5.80201e-05	5	75336329	75362104	3-hydroxy-3-methylglutaryl-CoA reductase [Source:HGNC Symbol;Acc:HGNC:5006]
ENSG00000150907	FOXO1	-1.25778	1.78866e-05	0.00197895	13	40469953	40666597	forkhead box O1 [Source:HGNC Symbol;Acc:HGNC:3819]
ENSG00000173258	ZNF483	-1.25271	4.35779e-05	0.0038112	9	111525159	111577844	zinc finger protein 483 [Source:HGNC Symbol;Acc:HGNC:23384]
ENSG00000171608	PIK3CD	-1.25071	8.98909e-06	0.00118772	1	9651732	9729114	phosphatidylinositol-4,5-bisphosphate 3-kinase catalytic subunit delta [Source:HGNC Symbol;Acc:HGNC:8977]
ENSG00000106701	FSD1L	-1.24745	0.00172282	0.04067	9	105447796	105552433	fibronectin type III and SPRY domain containing 1 like [Source:HGNC Symbol;Acc:HGNC:13753]
ENSG00000197860	SGTB	-1.24564	0.000106063	0.0070323	5	65665928	65723035	small glutamine rich tetratricopeptide repeat containing beta [Source:HGNC Symbol;Acc:HGNC:23567]
ENSG00000105613	MAST1	-1.23744	0.00051326	0.0193167	19	12833951	12874951	microtubule associated serine/threonine kinase 1 [Source:HGNC Symbol;Acc:HGNC:19034]
ENSG00000124191	TOX2	-1.23566	0.00147943	0.0370684	20	43914864	44069616	TOX high mobility group box family member 2 [Source:HGNC Symbol;Acc:HGNC:16095]
ENSG00000102781	KATNAL1	-1.23366	2.68127e-05	0.00256085	13	30202630	30307484	katanin catalytic subunit A1 like 1 [Source:HGNC Symbol;Acc:HGNC:28361]
ENSG00000128923	MINDY2	-1.22988	9.35789e-07	0.000204604	15	58771192	58861900	MINDY lysine 48 deubiquitinase 2 [Source:HGNC Symbol;Acc:HGNC:26954]
ENSG00000104728	ARHGEF10	-1.22714	0.00186323	0.0424568	8	1823976	1958641	Rho guanine nucleotide exchange factor 10 [Source:HGNC Symbol;Acc:HGNC:14103]
ENSG00000114739	ACVR2B	-1.22569	0.000765814	0.0249821	3	38453851	38493142	activin A receptor type 2B [Source:HGNC Symbol;Acc:HGNC:174]
ENSG00000137460	FHDC1	-1.22453	1.4188e-06	0.000283236	4	152936352	152979696	FH2 domain containing 1 [Source:HGNC Symbol;Acc:HGNC:29363]
ENSG00000110888	CAPRIN2	-1.21975	0.00026904	0.0131066	12	30709552	30754951	caprin family member 2 [Source:HGNC Symbol;Acc:HGNC:21259]
ENSG00000182890	GLUD2	-1.21315	0.000330886	0.0148947	X	121047588	121050080	glutamate dehydrogenase 2 [Source:HGNC Symbol;Acc:HGNC:4336]
ENSG00000124813	RUNX2	-1.21129	6.1232e-05	0.00482655	6	45328157	45664349	runt related transcription factor 2 [Source:HGNC Symbol;Acc:HGNC:10472]
ENSG00000155744	FAM126B	-1.20937	2.01755e-05	0.00215433	2	200973718	201071671	family with sequence similarity 126 member B [Source:HGNC Symbol;Acc:HGNC:28593]
ENSG00000108947	EFNB3	-1.20396	0.00210769	0.0456326	17	7705202	7711378	ephrin B3 [Source:HGNC Symbol;Acc:HGNC:3228]
ENSG00000182504	CEP97	-1.20158	0.000805578	0.0256852	3	101723925	101770562	centrosomal protein 97 [Source:HGNC Symbol;Acc:HGNC:26244]
ENSG00000072041	SLC6A15	-1.19566	0.00121281	0.0327085	12	84859488	84913615	solute carrier family 6 member 15 [Source:HGNC Symbol;Acc:HGNC:13621]
ENSG00000066248	NGEF	-1.19562	5.41671e-05	0.00437034	2	232878686	233013272	neuronal guanine nucleotide exchange factor [Source:HGNC Symbol;Acc:HGNC:7807]
ENSG00000103995	CEP152	-1.18668	0.000237166	0.0122011	15	48712928	48811146	centrosomal protein 152 [Source:HGNC Symbol;Acc:HGNC:29298]
ENSG00000213626	LBH	-1.18639	0.00079714	0.0256308	2	30231531	30323730	limb bud and heart development [Source:HGNC Symbol;Acc:HGNC:29532]
ENSG00000277476	RP11-147L13.13	-1.18599	2.69108e-05	0.00256085	17	68133201	68135935
ENSG00000138604	GLCE	-1.17976	1.20713e-07	3.51908e-05	15	69160584	69272217	glucuronic acid epimerase [Source:HGNC Symbol;Acc:HGNC:17855]
ENSG00000229656	RP11-462L8.1	-1.17753	0.000221866	0.0116423	10	32958845	33082102
ENSG00000129534	MIS18BP1	-1.17315	0.000298231	0.0139756	14	45203190	45253540	MIS18 binding protein 1 [Source:HGNC Symbol;Acc:HGNC:20190]
ENSG00000233937	CTC-338M12.4	-1.171	0.00074301	0.0246765	5	181246523	181272167
ENSG00000111450	STX2	-1.15704	1.36798e-08	5.84288e-06	12	130789600	130839266	syntaxin 2 [Source:HGNC Symbol;Acc:HGNC:3403]
ENSG00000274561	RP11-147L13.12	-1.15482	0.00047286	0.0184778	17	68131462	68131907
ENSG00000187244	BCAM	-1.14274	0.000113129	0.00739402	19	44809059	44821420	basal cell adhesion molecule (Lutheran blood group) [Source:HGNC Symbol;Acc:HGNC:6722]
ENSG00000124224	PPP4R1L	-1.13552	7.72583e-07	0.000179611	20	58228940	58309439	protein phosphatase 4 regulatory subunit 1 like (pseudogene) [Source:HGNC Symbol;Acc:HGNC:15755]
ENSG00000124181	PLCG1	-1.12801	0.00165023	0.0396702	20	41136960	41196801	phospholipase C gamma 1 [Source:HGNC Symbol;Acc:HGNC:9065]
ENSG00000014914	MTMR11	-1.1186	0.00108073	0.030617	1	149928651	149936869	myotubularin related protein 11 [Source:HGNC Symbol;Acc:HGNC:24307]
ENSG00000197258	EIF4BP6	-1.11571	7.15533e-06	0.00102668	7	104667749	104669576	eukaryotic translation initiation factor 4B pseudogene 6 [Source:HGNC Symbol;Acc:HGNC:37939]
ENSG00000129038	LOXL1	-1.10859	0.000118806	0.00768304	15	73925989	73952137	lysyl oxidase like 1 [Source:HGNC Symbol;Acc:HGNC:6665]
ENSG00000078403	MLLT10	-1.10633	0.000157298	0.00922984	10	21524675	21743630	myeloid/lymphoid or mixed-lineage leukemia; translocated to, 10 [Source:HGNC Symbol;Acc:HGNC:16063]
ENSG00000230002	ALMS1-IT1	-1.09543	0.00225532	0.0474831	2	73456764	73459484	ALMS1 intronic transcript 1 [Source:HGNC Symbol;Acc:HGNC:41305]
ENSG00000157741	UBN2	-1.09394	0.00104634	0.02994	7	139230356	139308236	ubinuclein 2 [Source:HGNC Symbol;Acc:HGNC:21931]
ENSG00000138468	SENP7	-1.08848	4.56102e-08	1.56465e-05	3	101324205	101513241	SUMO1/sentrin specific peptidase 7 [Source:HGNC Symbol;Acc:HGNC:30402]
ENSG00000214944	ARHGEF28	-1.08727	0.000179432	0.0100778	5	73626158	73941993	Rho guanine nucleotide exchange factor 28 [Source:HGNC Symbol;Acc:HGNC:30322]
ENSG00000054179	ENTPD2	-1.08491	0.000789799	0.025628	9	137048098	137054045	ectonucleoside triphosphate diphosphohydrolase 2 [Source:HGNC Symbol;Acc:HGNC:3364]
ENSG00000006016	CRLF1	-1.07787	0.00128307	0.0337123	19	18572220	18607741	cytokine receptor like factor 1 [Source:HGNC Symbol;Acc:HGNC:2364]
ENSG00000132334	PTPRE	-1.07038	0.00151286	0.0375475	10	127907061	128085855	protein tyrosine phosphatase, receptor type E [Source:HGNC Symbol;Acc:HGNC:9669]
ENSG00000140443	IGF1R	-1.06865	0.000830503	0.0259593	15	98648971	98964530	insulin like growth factor 1 receptor [Source:HGNC Symbol;Acc:HGNC:5465]
ENSG00000183474	GTF2H2C	-1.0618	0.00238499	0.0491613	5	69560208	69594723	GTF2H2 family member C [Source:HGNC Symbol;Acc:HGNC:31394]
ENSG00000163960	UBXN7	-1.05694	0.000619087	0.0219501	3	196347662	196432474	UBX domain protein 7 [Source:HGNC Symbol;Acc:HGNC:29119]
ENSG00000107863	ARHGAP21	-1.05635	0.000151348	0.00904441	10	24583609	24723668	Rho GTPase activating protein 21 [Source:HGNC Symbol;Acc:HGNC:23725]
ENSG00000148842	CNNM2	-1.05357	0.00216221	0.0462296	10	102918293	103090221	cyclin and CBS domain divalent metal cation transport mediator 2 [Source:HGNC Symbol;Acc:HGNC:103]
ENSG00000225031	EIF4BP7	-1.04839	0.000422727	0.017486	X	111619677	111621489	eukaryotic translation initiation factor 4B pseudogene 7 [Source:HGNC Symbol;Acc:HGNC:37940]
ENSG00000186684	CYP27C1	-1.04212	0.000328831	0.0148386	2	127184120	127220078	cytochrome P450 family 27 subfamily C member 1 [Source:HGNC Symbol;Acc:HGNC:33480]
ENSG00000128536	CDHR3	-1.03717	7.66362e-05	0.00567541	7	105876796	106033773	cadherin related family member 3 [Source:HGNC Symbol;Acc:HGNC:26308]
ENSG00000178026	LRRC75B	-1.03597	1.56506e-05	0.00181923	22	24585620	24593208	leucine rich repeat containing 75B [Source:HGNC Symbol;Acc:HGNC:33155]
ENSG00000115525	ST3GAL5	-1.03448	0.000312118	0.01446	2	85837120	85905199	ST3 beta-galactoside alpha-2,3-sialyltransferase 5 [Source:HGNC Symbol;Acc:HGNC:10872]
ENSG00000120063	GNA13	-1.00908	0.00177126	0.0413025	17	65010715	65056839	G protein subunit alpha 13 [Source:HGNC Symbol;Acc:HGNC:4381]
ENSG00000231259	AC125232.1	-1.00669	0.00122007	0.0327663	2	87031815	87053069
ENSG00000047056	WDR37	-1.00446	6.38566e-05	0.00494848	10	1049538	1132297	WD repeat domain 37 [Source:HGNC Symbol;Acc:HGNC:31406]

## Sheet: GefR vs Control SCC24-PDX UP
Supplementary Table S1: Genes with upregulated expression in GefR SCC24-PDX vs Control SCC24-PDX (padj<0.05; FC>2)
ID	Gene Symbol	log2 Fold Change GefR vs Control SCC24-PDX	pvalue GefR vs Control SCC24-PDX	padj GefR vs Control SCC24-PDX	chromosome name	start position	end position	description
ENSG00000144130	NT5DC4	4.5584	0.00133974	0.0285227	2	112721486	112742879	5'-nucleotidase domain containing 4 [Source:HGNC Symbol;Acc:HGNC:27678]
ENSG00000152936	LMNTD1	4.41833	0.000231333	0.0087534	12	25409307	25648579	lamin tail domain containing 1 [Source:HGNC Symbol;Acc:HGNC:26683]
ENSG00000167077	MEI1	4.0562	0.00312352	0.0486895	22	41699499	41799456	meiotic double-stranded break formation protein 1 [Source:HGNC Symbol;Acc:HGNC:28613]
ENSG00000181143	MUC16	3.87501	0.000134304	0.00620439	19	8848844	8981342	mucin 16, cell surface associated [Source:HGNC Symbol;Acc:HGNC:15582]
ENSG00000170477	KRT4	3.70181	0.00186391	0.035547	12	52806549	52814551	keratin 4 [Source:HGNC Symbol;Acc:HGNC:6441]
ENSG00000100867	DHRS2	3.64284	4.74237e-11	1.31765e-07	14	23630115	23645639	dehydrogenase/reductase 2 [Source:HGNC Symbol;Acc:HGNC:18349]
ENSG00000259207	ITGB3	3.46931	0.00168261	0.0332212	17	47253846	47311816	integrin subunit beta 3 [Source:HGNC Symbol;Acc:HGNC:6156]
ENSG00000257642	KCCAT198	3.25995	4.00822e-07	0.000121202	12	105304867	105327017	renal clear cell carcinoma-associated transcript 198 [Source:EntrezGene;Acc:105369954]
ENSG00000254510	RP11-867G23.10	3.25752	0.00125873	0.0275689	11	66409158	66417137
ENSG00000128928	IVD	3.16665	1.86534e-09	2.73101e-06	15	40405795	40435947	isovaleryl-CoA dehydrogenase [Source:HGNC Symbol;Acc:HGNC:6186]
ENSG00000092621	PHGDH	3.09542	2.26004e-07	8.27219e-05	1	119659798	119744215	phosphoglycerate dehydrogenase [Source:HGNC Symbol;Acc:HGNC:8923]
ENSG00000230882	AC005077.14	3.09236	0.000197701	0.00785561	7	76071469	76074963
ENSG00000119411	BSPRY	2.97069	3.05603e-05	0.00244377	9	113349541	113371233	B-box and SPRY domain containing [Source:HGNC Symbol;Acc:HGNC:18232]
ENSG00000176595	KBTBD11	2.76959	1.78025e-05	0.00171997	8	1973878	2006936	kelch repeat and BTB domain containing 11 [Source:HGNC Symbol;Acc:HGNC:29104]
ENSG00000267405	CTC-296K1.4	2.66397	0.00282511	0.0459649	17	44794747	44797783
ENSG00000176046	NUPR1	2.65961	0.000220954	0.00849578	16	28532708	28539174	nuclear protein 1, transcriptional regulator [Source:HGNC Symbol;Acc:HGNC:29990]
ENSG00000151164	RAD9B	2.65562	0.00106881	0.0246578	12	110501655	110532086	RAD9 checkpoint clamp component B [Source:HGNC Symbol;Acc:HGNC:21700]
ENSG00000234667	ACTBP13	2.58184	0.00179247	0.0346004	3	49873347	49877980	actin, beta pseudogene 13 [Source:HGNC Symbol;Acc:HGNC:44626]
ENSG00000230650	AC112229.1	2.56547	0.000484826	0.0146938	2	110360608	110363737
ENSG00000143632	ACTA1	2.52183	0.00123205	0.0271408	1	229431245	229434098	actin, alpha 1, skeletal muscle [Source:HGNC Symbol;Acc:HGNC:129]
ENSG00000151692	RNF144A	2.52012	5.34916e-05	0.00348452	2	6917392	7068286	ring finger protein 144A [Source:HGNC Symbol;Acc:HGNC:20457]
ENSG00000106123	EPHB6	2.50294	0.000164904	0.00714949	7	142855061	142871094	EPH receptor B6 [Source:HGNC Symbol;Acc:HGNC:3396]
ENSG00000173210	ABLIM3	2.46871	4.05586e-08	2.27045e-05	5	149141483	149260542	actin binding LIM protein family member 3 [Source:HGNC Symbol;Acc:HGNC:29132]
ENSG00000103489	XYLT1	2.42184	1.75676e-07	6.9659e-05	16	17101769	17470881	xylosyltransferase 1 [Source:HGNC Symbol;Acc:HGNC:15516]
ENSG00000163017	ACTG2	2.42003	5.16168e-10	1.09158e-06	2	73892314	73919865	actin, gamma 2, smooth muscle, enteric [Source:HGNC Symbol;Acc:HGNC:145]
ENSG00000151715	TMEM45B	2.39818	0.000599583	0.0171349	11	129815819	129860003	transmembrane protein 45B [Source:HGNC Symbol;Acc:HGNC:25194]
ENSG00000230439	RP11-488P3.1	2.3805	6.38223e-05	0.00388093	1	93752924	93775444
ENSG00000115461	IGFBP5	2.35362	0.00226043	0.0403297	2	216672105	216695525	insulin like growth factor binding protein 5 [Source:HGNC Symbol;Acc:HGNC:5474]
ENSG00000122254	HS3ST2	2.33363	0.000116241	0.00565835	16	22814177	22916338	heparan sulfate-glucosamine 3-sulfotransferase 2 [Source:HGNC Symbol;Acc:HGNC:5195]
ENSG00000164002	EXO5	2.26662	9.46859e-09	8.62851e-06	1	40508741	40516556	exonuclease 5 [Source:HGNC Symbol;Acc:HGNC:26115]
ENSG00000077935	SMC1B	2.26072	0.000315751	0.0106457	22	45344063	45413619	structural maintenance of chromosomes 1B [Source:HGNC Symbol;Acc:HGNC:11112]
ENSG00000204644	ZFP57	2.25779	0.000129552	0.00605841	6	29672392	29681110	ZFP57 zinc finger protein [Source:HGNC Symbol;Acc:HGNC:18791]
ENSG00000234719	NPIPB2	2.2439	0.00315599	0.0488358	16	11927373	11976643	nuclear pore complex interacting protein family, member B2 [Source:HGNC Symbol;Acc:HGNC:37451]
ENSG00000188883	KLRG2	2.2418	0.000184698	0.00750747	7	139452690	139483712	killer cell lectin like receptor G2 [Source:HGNC Symbol;Acc:HGNC:24778]
ENSG00000179546	HTR1D	2.23148	6.47986e-05	0.00391528	1	23191895	23194729	5-hydroxytryptamine receptor 1D [Source:HGNC Symbol;Acc:HGNC:5289]
ENSG00000277200	RP11-74E22.8	2.19049	0.00277765	0.045575	17	2720801	2723947
ENSG00000148082	SHC3	2.1663	0.000168957	0.00719409	9	89005771	89178767	SHC adaptor protein 3 [Source:HGNC Symbol;Acc:HGNC:18181]
ENSG00000133424	LARGE1	2.164	9.98922e-05	0.00515244	22	33162226	33922841	LARGE xylosyl- and glucuronyltransferase 1 [Source:HGNC Symbol;Acc:HGNC:6511]
ENSG00000137709	POU2F3	2.15585	3.34087e-06	0.000538871	11	120236640	120319944	POU class 2 homeobox 3 [Source:HGNC Symbol;Acc:HGNC:19864]
ENSG00000180353	HCLS1	2.15484	0.00161004	0.032352	3	121631399	121660927	hematopoietic cell-specific Lyn substrate 1 [Source:HGNC Symbol;Acc:HGNC:4844]
ENSG00000176125	UFSP1	2.14881	8.38473e-05	0.0046257	7	100888723	100889718	UFM1 specific peptidase 1 (inactive) [Source:HGNC Symbol;Acc:HGNC:33821]
ENSG00000168806	LCMT2	2.13612	6.27691e-06	0.000835443	15	43323649	43330605	leucine carboxyl methyltransferase 2 [Source:HGNC Symbol;Acc:HGNC:17558]
ENSG00000104177	MYEF2	2.1043	1.62767e-07	6.59137e-05	15	48134631	48178517	myelin expression factor 2 [Source:HGNC Symbol;Acc:HGNC:17940]
ENSG00000125780	TGM3	2.07139	2.78581e-05	0.00233578	20	2296001	2341078	transglutaminase 3 [Source:HGNC Symbol;Acc:HGNC:11779]
ENSG00000180336	MEIOC	2.07092	0.00284911	0.0462689	17	44656404	44690308	meiosis specific with coiled-coil domain [Source:HGNC Symbol;Acc:HGNC:26670]
ENSG00000197646	PDCD1LG2	2.07019	1.84657e-09	2.73101e-06	9	5510570	5571254	programmed cell death 1 ligand 2 [Source:HGNC Symbol;Acc:HGNC:18731]
ENSG00000109511	ANXA10	2.06984	0.00209727	0.038089	4	168092515	168187690	annexin A10 [Source:HGNC Symbol;Acc:HGNC:534]
ENSG00000236461	RP11-523L1.2	2.0695	0.002865	0.0464058	9	115119539	115138409
ENSG00000262712	RP11-295D4.1	2.05755	0.00227733	0.0404428	16	4335870	4337818
ENSG00000205363	C15orf59	2.04102	0.00251884	0.0432682	15	73735431	73752747	chromosome 15 open reading frame 59 [Source:HGNC Symbol;Acc:HGNC:33753]
ENSG00000120949	TNFRSF8	2.0343	0.00318691	0.0492569	1	12063377	12144207	TNF receptor superfamily member 8 [Source:HGNC Symbol;Acc:HGNC:11923]
ENSG00000248905	FMN1	2.03394	3.83226e-06	0.000602805	15	32765545	33194733	formin 1 [Source:HGNC Symbol;Acc:HGNC:3768]
ENSG00000171208	NETO2	2.03198	3.58776e-05	0.00273143	16	47077703	47143997	neuropilin and tolloid like 2 [Source:HGNC Symbol;Acc:HGNC:14644]
ENSG00000187105	HEATR4	2.01712	4.66625e-05	0.00328936	14	73478484	73558947	HEAT repeat containing 4 [Source:HGNC Symbol;Acc:HGNC:16761]
ENSG00000104611	SH2D4A	1.99677	1.74725e-10	4.15693e-07	8	19313617	19396218	SH2 domain containing 4A [Source:HGNC Symbol;Acc:HGNC:26102]
ENSG00000149596	JPH2	1.98519	0.000324736	0.0108054	20	44111695	44187578	junctophilin 2 [Source:HGNC Symbol;Acc:HGNC:14202]
ENSG00000138771	SHROOM3	1.97612	3.82632e-05	0.00283371	4	76435100	76783253	shroom family member 3 [Source:HGNC Symbol;Acc:HGNC:30422]
ENSG00000162426	SLC45A1	1.97551	0.00120717	0.0266853	1	8317826	8344167	solute carrier family 45 member 1 [Source:HGNC Symbol;Acc:HGNC:17939]
ENSG00000068976	PYGM	1.97247	0.00044414	0.0137901	11	64746389	64760297	glycogen phosphorylase, muscle associated [Source:HGNC Symbol;Acc:HGNC:9726]
ENSG00000229334	AC046143.3	1.95565	0.000106238	0.00531286	3	194632923	194645401
ENSG00000261351	CTD-3185P2.1	1.95179	0.00124271	0.0273123	15	66488658	66492109
ENSG00000064270	ATP2C2	1.95012	2.22235e-05	0.0020533	16	84368527	84464187	ATPase secretory pathway Ca2+ transporting 2 [Source:HGNC Symbol;Acc:HGNC:29103]
ENSG00000281005	LINC00921	1.94397	0.0030891	0.0484707	16	3263743	3267567	long intergenic non-protein coding RNA 921 [Source:HGNC Symbol;Acc:HGNC:26830]
ENSG00000172382	PRSS27	1.94098	0.000155061	0.00687944	16	2712418	2720551	protease, serine 27 [Source:HGNC Symbol;Acc:HGNC:15475]
ENSG00000225335	XXbac-B476C20.9	1.94019	0.000455629	0.0140323	22	18076527	18078884
ENSG00000232133	IMPDH1P10	1.92952	0.000149907	0.00671338	2	201137516	201140027	inosine monophosphate dehydrogenase 1 pseudogene 10 [Source:HGNC Symbol;Acc:HGNC:33965]
ENSG00000234771	SLC25A25-AS1	1.90697	3.09682e-06	0.000508119	9	128108581	128118693	SLC25A25 antisense RNA 1 [Source:HGNC Symbol;Acc:HGNC:27844]
ENSG00000171303	KCNK3	1.89767	0.000621168	0.0174349	2	26692690	26733420	potassium two pore domain channel subfamily K member 3 [Source:HGNC Symbol;Acc:HGNC:6278]
ENSG00000246223	LINC01550	1.89569	0.000652407	0.017996	14	97925610	97978124	long intergenic non-protein coding RNA 1550 [Source:HGNC Symbol;Acc:HGNC:20111]
ENSG00000280213	UCKL1-AS1	1.89245	0.00179873	0.034651	20	63953384	63956985	UCKL1 antisense RNA 1 [Source:HGNC Symbol;Acc:HGNC:31967]
ENSG00000180066	C10orf91	1.88963	5.18927e-06	0.000700477	10	132444327	132449408	chromosome 10 open reading frame 91 [Source:HGNC Symbol;Acc:HGNC:27275]
ENSG00000144908	ALDH1L1	1.8855	0.00269948	0.04503	3	126103562	126197994	aldehyde dehydrogenase 1 family member L1 [Source:HGNC Symbol;Acc:HGNC:3978]
ENSG00000105357	MYH14	1.86601	0.000353615	0.0115109	19	50188186	50310545	myosin heavy chain 14 [Source:HGNC Symbol;Acc:HGNC:23212]
ENSG00000204947	ZNF425	1.86459	0.000153606	0.00683078	7	149102784	149126346	zinc finger protein 425 [Source:HGNC Symbol;Acc:HGNC:20690]
ENSG00000050438	SLC4A8	1.85873	2.20862e-05	0.00205057	12	51391317	51515763	solute carrier family 4 member 8 [Source:HGNC Symbol;Acc:HGNC:11034]
ENSG00000036448	MYOM2	1.8419	0.00197837	0.036916	8	2045040	2165552	myomesin 2 [Source:HGNC Symbol;Acc:HGNC:7614]
ENSG00000235885	LINC01828	1.83617	0.000712231	0.0190659	2	67086446	67311439	long intergenic non-protein coding RNA 1828 [Source:HGNC Symbol;Acc:HGNC:52634]
ENSG00000136492	BRIP1	1.82268	0.000129385	0.00605841	17	61681266	61863521	BRCA1 interacting protein C-terminal helicase 1 [Source:HGNC Symbol;Acc:HGNC:20473]
ENSG00000275393	RP11-568J23.8	1.82065	5.13996e-05	0.00343259	16	85697335	85697868
ENSG00000158089	GALNT14	1.81812	2.33017e-08	1.58393e-05	2	30910467	31155202	polypeptide N-acetylgalactosaminyltransferase 14 [Source:HGNC Symbol;Acc:HGNC:22946]
ENSG00000262468	LINC01569	1.81694	1.24386e-05	0.00133002	16	4245825	4253789	long intergenic non-protein coding RNA 1569 [Source:HGNC Symbol;Acc:HGNC:51380]
ENSG00000166589	CDH16	1.8074	0.000502542	0.0151583	16	66908122	66918984	cadherin 16 [Source:HGNC Symbol;Acc:HGNC:1755]
ENSG00000214654	RP11-27I1.4	1.77316	7.26333e-06	0.000915516	9	120793551	120799918	Putative UDP-GlcNAc:betaGal beta-1,3-N-acetylglucosaminyltransferase LOC100288842 [Source:UniProtKB/Swiss-Prot;Acc:A8MXE2]
ENSG00000146094	DOK3	1.75962	0.00181233	0.0348426	5	177501907	177511274	docking protein 3 [Source:HGNC Symbol;Acc:HGNC:24583]
ENSG00000177946	CENPBD1	1.75686	7.06535e-05	0.00413631	16	89969791	89972534	CENPB DNA-binding domain containing 1 [Source:HGNC Symbol;Acc:HGNC:28272]
ENSG00000118894	EEF2KMT	1.73555	5.537e-05	0.0035724	16	5084304	5097808	eukaryotic elongation factor 2 lysine methyltransferase [Source:HGNC Symbol;Acc:HGNC:32221]
ENSG00000267858	MZF1-AS1	1.71958	0.000718072	0.0191909	19	58559129	58574797	MZF1 antisense RNA 1 [Source:HGNC Symbol;Acc:HGNC:51271]
ENSG00000179698	WDR97	1.71294	0.00127777	0.0277917	8	144107726	144118315	WD repeat domain 97 [Source:HGNC Symbol;Acc:HGNC:26959]
ENSG00000111254	AKAP3	1.69562	0.00164224	0.0326953	12	4615508	4649047	A-kinase anchoring protein 3 [Source:HGNC Symbol;Acc:HGNC:373]
ENSG00000224081	SLC44A3-AS1	1.68214	1.75121e-05	0.00170927	1	94613814	94855426	SLC44A3 antisense RNA 1 [Source:HGNC Symbol;Acc:HGNC:49057]
ENSG00000204569	PPP1R10	1.68193	6.67183e-05	0.0039721	6	30600400	30618612	protein phosphatase 1 regulatory subunit 10 [Source:HGNC Symbol;Acc:HGNC:9284]
ENSG00000250519	RP11-680H20.2	1.66656	4.78711e-05	0.00333748	11	94238150	94279206
ENSG00000101605	MYOM1	1.66578	1.9107e-06	0.000382803	18	3066807	3220108	myomesin 1 [Source:HGNC Symbol;Acc:HGNC:7613]
ENSG00000257219	RP11-54A9.1	1.6615	0.00313986	0.0487714	12	76259839	76305131
ENSG00000088367	EPB41L1	1.65319	0.00212866	0.038495	20	36091504	36232799	erythrocyte membrane protein band 4.1 like 1 [Source:HGNC Symbol;Acc:HGNC:3378]
ENSG00000085276	MECOM	1.64548	0.00190698	0.0359447	3	169083499	169663618	MDS1 and EVI1 complex locus [Source:HGNC Symbol;Acc:HGNC:3498]
ENSG00000140853	NLRC5	1.64125	0.000106342	0.00531286	16	56989485	57083531	NLR family CARD domain containing 5 [Source:HGNC Symbol;Acc:HGNC:29933]
ENSG00000178821	TMEM52	1.6332	1.09502e-05	0.0012106	1	1917590	1919273	transmembrane protein 52 [Source:HGNC Symbol;Acc:HGNC:27916]
ENSG00000274349	ZNF658	1.63185	0.000255312	0.00932697	9	66856426	66932141	zinc finger protein 658 [Source:HGNC Symbol;Acc:HGNC:25226]
ENSG00000180035	ZNF48	1.63032	8.74232e-05	0.0047677	16	30378106	30400108	zinc finger protein 48 [Source:HGNC Symbol;Acc:HGNC:13114]
ENSG00000213225	NOC2LP1	1.6284	0.000982357	0.0232263	2	130229379	130232106	NOC2 like nucleolar associated transcriptional repressor pseudogene 1 [Source:HGNC Symbol;Acc:HGNC:52285]
ENSG00000177352	CCDC71	1.62411	0.00206136	0.0376524	3	49162535	49166321	coiled-coil domain containing 71 [Source:HGNC Symbol;Acc:HGNC:25760]
ENSG00000085831	TTC39A	1.62178	0.000701721	0.0188909	1	51287258	51345116	tetratricopeptide repeat domain 39A [Source:HGNC Symbol;Acc:HGNC:18657]
ENSG00000237489	LINC00959	1.61038	0.00256072	0.0436391	10	130063900	130110817	long intergenic non-protein coding RNA 959 [Source:HGNC Symbol;Acc:HGNC:48677]
ENSG00000167264	DUS2	1.60893	1.95568e-07	7.59643e-05	16	67987746	68079320	dihydrouridine synthase 2 [Source:HGNC Symbol;Acc:HGNC:26014]
ENSG00000258088	RP11-114H23.2	1.6053	0.00244801	0.0423187	12	75694010	75698816
ENSG00000143127	ITGA10	1.6038	0.00235648	0.0412198	1	145891208	145910189	integrin subunit alpha 10 [Source:HGNC Symbol;Acc:HGNC:6135]
ENSG00000129646	QRICH2	1.6018	0.000482017	0.0146319	17	76274049	76307998	glutamine rich 2 [Source:HGNC Symbol;Acc:HGNC:25326]
ENSG00000179886	TIGD5	1.59657	6.84404e-05	0.00405803	8	143597835	143603224	tigger transposable element derived 5 [Source:HGNC Symbol;Acc:HGNC:18336]
ENSG00000196296	ATP2A1	1.59405	6.13852e-05	0.00376885	16	28878405	28904509	ATPase sarcoplasmic/endoplasmic reticulum Ca2+ transporting 1 [Source:HGNC Symbol;Acc:HGNC:811]
ENSG00000181830	SLC35C1	1.58624	7.71932e-06	0.000954038	11	45804072	45813015	solute carrier family 35 member C1 [Source:HGNC Symbol;Acc:HGNC:20197]
ENSG00000159792	PSKH1	1.58038	0.000114638	0.00562927	16	67893272	67929678	protein serine kinase H1 [Source:HGNC Symbol;Acc:HGNC:9529]
ENSG00000104147	OIP5	1.57488	4.81032e-06	0.000668284	15	41309268	41332621	Opa interacting protein 5 [Source:HGNC Symbol;Acc:HGNC:20300]
ENSG00000260274	RP11-817O13.8	1.57457	0.000301088	0.0103068	15	75368155	75369584
ENSG00000171084	FAM86JP	1.56355	0.00210391	0.0381732	3	125916620	125930024	family with sequence similarity 86 member J, pseudogene [Source:HGNC Symbol;Acc:HGNC:44097]
ENSG00000079385	CEACAM1	1.56284	0.001177	0.0261316	19	42507304	42561234	carcinoembryonic antigen related cell adhesion molecule 1 [Source:HGNC Symbol;Acc:HGNC:1814]
ENSG00000170100	ZNF778	1.55911	0.00100363	0.0235829	16	89217703	89237071	zinc finger protein 778 [Source:HGNC Symbol;Acc:HGNC:26479]
ENSG00000162194	LBHD1	1.55865	0.00123927	0.0272682	11	62662817	62672255	LBH domain containing 1 [Source:HGNC Symbol;Acc:HGNC:28351]
ENSG00000155592	ZKSCAN2	1.55779	6.40827e-07	0.000171787	16	25236001	25257931	zinc finger with KRAB and SCAN domains 2 [Source:HGNC Symbol;Acc:HGNC:25677]
ENSG00000102870	ZNF629	1.5478	2.66305e-05	0.00225327	16	30778449	30787202	zinc finger protein 629 [Source:HGNC Symbol;Acc:HGNC:29008]
ENSG00000168575	SLC20A2	1.53815	3.63471e-05	0.00274521	8	42416475	42541926	solute carrier family 20 member 2 [Source:HGNC Symbol;Acc:HGNC:10947]
ENSG00000175595	ERCC4	1.53799	0.000623616	0.0174349	16	13920157	13952345	ERCC excision repair 4, endonuclease catalytic subunit [Source:HGNC Symbol;Acc:HGNC:3436]
ENSG00000175283	DOLK	1.5378	3.63614e-06	0.000576721	9	128945530	128947619	dolichol kinase [Source:HGNC Symbol;Acc:HGNC:23406]
ENSG00000231365	RP11-418J17.1	1.53559	1.09672e-05	0.0012106	1	119140396	119275973
ENSG00000138798	EGF	1.53367	0.000518045	0.0154545	4	109912884	110012266	epidermal growth factor [Source:HGNC Symbol;Acc:HGNC:3229]
ENSG00000175711	B3GNTL1	1.53135	1.34886e-05	0.00140101	17	82942155	83051810	UDP-GlcNAc:betaGal beta-1,3-N-acetylglucosaminyltransferase-like 1 [Source:HGNC Symbol;Acc:HGNC:21727]
ENSG00000177551	NHLH2	1.52987	0.0027383	0.0453897	1	115836377	115843917	nescient helix-loop-helix 2 [Source:HGNC Symbol;Acc:HGNC:7818]
ENSG00000188277	C15orf62	1.52817	0.000603995	0.0171836	15	40770080	40772449	chromosome 15 open reading frame 62 [Source:HGNC Symbol;Acc:HGNC:34489]
ENSG00000196922	ZNF252P	1.52783	0.000254653	0.00932697	8	144973589	145002895	zinc finger protein 252, pseudogene [Source:HGNC Symbol;Acc:HGNC:13046]
ENSG00000157895	C12orf43	1.52535	2.55281e-05	0.00221236	12	121000486	121016502	chromosome 12 open reading frame 43 [Source:HGNC Symbol;Acc:HGNC:25719]
ENSG00000197852	FAM212B	1.51876	2.47944e-06	0.00044104	1	111680630	111755824	family with sequence similarity 212 member B [Source:HGNC Symbol;Acc:HGNC:28045]
ENSG00000214783	POLR2J4	1.51468	0.00176355	0.0343011	7	43940895	44019175	RNA polymerase II subunit J4, pseudogene [Source:HGNC Symbol;Acc:HGNC:28195]
ENSG00000176022	B3GALT6	1.51391	0.000397847	0.0126838	1	1232265	1235041	beta-1,3-galactosyltransferase 6 [Source:HGNC Symbol;Acc:HGNC:17978]
ENSG00000132623	ANKEF1	1.51012	0.000160777	0.00703219	20	9986126	10058303	ankyrin repeat and EF-hand domain containing 1 [Source:HGNC Symbol;Acc:HGNC:15803]
ENSG00000166922	SCG5	1.50953	0.000320906	0.0107721	15	32641676	32697098	secretogranin V [Source:HGNC Symbol;Acc:HGNC:10816]
ENSG00000140987	ZSCAN32	1.50719	0.000269598	0.00964083	16	3382081	3401065	zinc finger and SCAN domain containing 32 [Source:HGNC Symbol;Acc:HGNC:20812]
ENSG00000162645	GBP2	1.49736	7.25569e-05	0.0041685	1	89106132	89150456	guanylate binding protein 2 [Source:HGNC Symbol;Acc:HGNC:4183]
ENSG00000100413	POLR3H	1.49689	0.00029541	0.0101674	22	41525804	41544606	RNA polymerase III subunit H [Source:HGNC Symbol;Acc:HGNC:30349]
ENSG00000162063	CCNF	1.49544	0.000608809	0.0172904	16	2429394	2458854	cyclin F [Source:HGNC Symbol;Acc:HGNC:1591]
ENSG00000109063	MYH3	1.49378	2.55724e-05	0.00221236	17	10628526	10657309	myosin heavy chain 3 [Source:HGNC Symbol;Acc:HGNC:7573]
ENSG00000167114	SLC27A4	1.49243	2.32045e-06	0.000432991	9	128340646	128361470	solute carrier family 27 member 4 [Source:HGNC Symbol;Acc:HGNC:10998]
ENSG00000124160	NCOA5	1.48922	7.61599e-07	0.000198569	20	46060985	46089952	nuclear receptor coactivator 5 [Source:HGNC Symbol;Acc:HGNC:15909]
ENSG00000166343	MSS51	1.48712	0.0018741	0.0356218	10	73423579	73433561	MSS51 mitochondrial translational activator [Source:HGNC Symbol;Acc:HGNC:21000]
ENSG00000124217	MOCS3	1.47735	0.00206058	0.0376524	20	50958826	50963931	molybdenum cofactor synthesis 3 [Source:HGNC Symbol;Acc:HGNC:15765]
ENSG00000183072	NKX2-5	1.47715	7.84649e-07	0.000201814	5	173232109	173235357	NK2 homeobox 5 [Source:HGNC Symbol;Acc:HGNC:2488]
ENSG00000266088	RP5-1028K7.2	1.47279	0.000171785	0.00723361	17	40517026	40527002
ENSG00000168062	BATF2	1.46938	7.41817e-05	0.0041685	11	64987943	64997045	basic leucine zipper ATF-like transcription factor 2 [Source:HGNC Symbol;Acc:HGNC:25163]
ENSG00000173013	CCDC96	1.46786	0.0016106	0.032352	4	7040849	7042939	coiled-coil domain containing 96 [Source:HGNC Symbol;Acc:HGNC:26900]
ENSG00000245680	ZNF585B	1.46599	4.74325e-05	0.00332682	19	37181579	37218153	zinc finger protein 585B [Source:HGNC Symbol;Acc:HGNC:30948]
ENSG00000178700	DHFR2	1.45716	0.000874182	0.0215522	3	94047836	94063389	dihydrofolate reductase 2 [Source:HGNC Symbol;Acc:HGNC:27309]
ENSG00000175564	UCP3	1.45343	0.000946383	0.0227459	11	74000281	74009435	uncoupling protein 3 [Source:HGNC Symbol;Acc:HGNC:12519]
ENSG00000197808	ZNF461	1.45033	8.93165e-05	0.00479059	19	36637192	36666853	zinc finger protein 461 [Source:HGNC Symbol;Acc:HGNC:21629]
ENSG00000185085	INTS5	1.43989	5.20305e-05	0.00343525	11	62646848	62653302	integrator complex subunit 5 [Source:HGNC Symbol;Acc:HGNC:29352]
ENSG00000144182	LIPT1	1.43699	0.00301517	0.0479735	2	99154955	99163157	lipoyltransferase 1 [Source:HGNC Symbol;Acc:HGNC:29569]
ENSG00000203721	LINC00862	1.43464	0.00083408	0.0210339	1	200253419	200400705	long intergenic non-protein coding RNA 862 [Source:HGNC Symbol;Acc:HGNC:21901]
ENSG00000170044	ZPLD1	1.4329	0.000731354	0.019414	3	102099244	102479841	zona pellucida like domain containing 1 [Source:HGNC Symbol;Acc:HGNC:27022]
ENSG00000141837	CACNA1A	1.43203	0.000202616	0.00796774	19	13206442	13633025	calcium voltage-gated channel subunit alpha1 A [Source:HGNC Symbol;Acc:HGNC:1388]
ENSG00000152433	ZNF547	1.42316	0.00173169	0.0338739	19	57363477	57379565	zinc finger protein 547 [Source:HGNC Symbol;Acc:HGNC:26432]
ENSG00000134256	CD101	1.39724	4.35237e-05	0.00312599	1	117001750	117036476	CD101 molecule [Source:HGNC Symbol;Acc:HGNC:5949]
ENSG00000120925	RNF170	1.39059	0.000992952	0.0234143	8	42849637	42897290	ring finger protein 170 [Source:HGNC Symbol;Acc:HGNC:25358]
ENSG00000198246	SLC29A3	1.39008	0.000416939	0.013204	10	71319258	71363385	solute carrier family 29 member 3 [Source:HGNC Symbol;Acc:HGNC:23096]
ENSG00000148225	WDR31	1.38887	0.00127477	0.0277917	9	113313222	113340298	WD repeat domain 31 [Source:HGNC Symbol;Acc:HGNC:21421]
ENSG00000181638	ZFP41	1.38859	8.92643e-05	0.00479059	8	143246821	143262705	ZFP41 zinc finger protein [Source:HGNC Symbol;Acc:HGNC:26786]
ENSG00000173281	PPP1R3B	1.37589	0.000839004	0.0210392	8	9136255	9151574	protein phosphatase 1 regulatory subunit 3B [Source:HGNC Symbol;Acc:HGNC:14942]
ENSG00000065457	ADAT1	1.3734	0.00224813	0.0402149	16	75596981	75623300	adenosine deaminase, tRNA specific 1 [Source:HGNC Symbol;Acc:HGNC:228]
ENSG00000158296	SLC13A3	1.37313	0.00127504	0.0277917	20	46557823	46684467	solute carrier family 13 member 3 [Source:HGNC Symbol;Acc:HGNC:14430]
ENSG00000255624	RP11-564D11.3	1.37189	0.00116209	0.0259297	10	122879851	122898024
ENSG00000177374	HIC1	1.37069	0.000706326	0.0189512	17	2054154	2063241	HIC ZBTB transcriptional repressor 1 [Source:HGNC Symbol;Acc:HGNC:4909]
ENSG00000280143	AP000892.6	1.3696	0.000576552	0.0166265	11	117204967	117210292
ENSG00000158483	FAM86C1	1.36942	0.00313524	0.0487525	11	71787510	71801236	family with sequence similarity 86 member C1 [Source:HGNC Symbol;Acc:HGNC:25561]
ENSG00000224167	RP3-522D1.1	1.36091	2.43366e-06	0.000438388	1	112850028	112877871
ENSG00000103343	ZNF174	1.36057	4.75435e-05	0.00332682	16	3401235	3409370	zinc finger protein 174 [Source:HGNC Symbol;Acc:HGNC:12963]
ENSG00000213699	SLC35F6	1.3554	5.25492e-05	0.00344886	2	26764284	26781231	solute carrier family 35 member F6 [Source:HGNC Symbol;Acc:HGNC:26055]
ENSG00000103042	SLC38A7	1.35532	0.000868474	0.0214828	16	58665109	58685104	solute carrier family 38 member 7 [Source:HGNC Symbol;Acc:HGNC:25582]
ENSG00000163704	PRRT3	1.35216	0.00314918	0.0488097	3	9945542	9952394	proline rich transmembrane protein 3 [Source:HGNC Symbol;Acc:HGNC:26591]
ENSG00000162086	ZNF75A	1.34989	0.000245173	0.009114	16	3305406	3318852	zinc finger protein 75a [Source:HGNC Symbol;Acc:HGNC:13146]
ENSG00000212719	C17orf51	1.34955	0.00016053	0.00703219	17	21524790	21574458	chromosome 17 open reading frame 51 [Source:HGNC Symbol;Acc:HGNC:27904]
ENSG00000142185	TRPM2	1.34513	0.000416506	0.013204	21	44350163	44443081	transient receptor potential cation channel subfamily M member 2 [Source:HGNC Symbol;Acc:HGNC:12339]
ENSG00000178826	TMEM139	1.34499	0.000117803	0.0057043	7	143279957	143288048	transmembrane protein 139 [Source:HGNC Symbol;Acc:HGNC:22058]
ENSG00000250312	ZNF718	1.34396	0.000421403	0.0133011	4	124480	163989	zinc finger protein 718 [Source:HGNC Symbol;Acc:HGNC:26889]
ENSG00000171320	ESCO2	1.34337	1.26679e-06	0.000273179	8	27771949	27812640	establishment of sister chromatid cohesion N-acetyltransferase 2 [Source:HGNC Symbol;Acc:HGNC:27230]
ENSG00000117525	F3	1.33953	0.00111443	0.0254354	1	94529225	94541800	coagulation factor III, tissue factor [Source:HGNC Symbol;Acc:HGNC:3541]
ENSG00000177602	GSG2	1.33731	0.000698241	0.0188398	17	3723903	3726699	germ cell associated 2, haspin [Source:HGNC Symbol;Acc:HGNC:19682]
ENSG00000179532	DNHD1	1.33082	0.000980716	0.0232164	11	6497260	6593758	dynein heavy chain domain 1 [Source:HGNC Symbol;Acc:HGNC:26532]
ENSG00000167840	ZNF232	1.32973	0.000333346	0.0110149	17	5105541	5123116	zinc finger protein 232 [Source:HGNC Symbol;Acc:HGNC:13026]
ENSG00000167968	DNASE1L2	1.32938	0.000720933	0.0191909	16	2235816	2238711	deoxyribonuclease 1 like 2 [Source:HGNC Symbol;Acc:HGNC:2958]
ENSG00000166123	GPT2	1.3283	3.06868e-05	0.00244377	16	46884378	46931297	glutamic--pyruvic transaminase 2 [Source:HGNC Symbol;Acc:HGNC:18062]
ENSG00000158792	SPATA2L	1.31636	0.00207139	0.0377994	16	89696343	89701705	spermatogenesis associated 2 like [Source:HGNC Symbol;Acc:HGNC:28393]
ENSG00000178718	RPP25	1.31361	0.00241264	0.0419741	15	74954416	74957464	ribonuclease P and MRP subunit p25 [Source:HGNC Symbol;Acc:HGNC:30361]
ENSG00000187994	RINL	1.30947	0.000175288	0.00732543	19	38867834	38878279	Ras and Rab interactor like [Source:HGNC Symbol;Acc:HGNC:24795]
ENSG00000278619	MRM1	1.30662	0.000962462	0.0229459	17	36601572	36608971	mitochondrial rRNA methyltransferase 1 [Source:HGNC Symbol;Acc:HGNC:26202]
ENSG00000205710	C17orf107	1.30549	0.00077033	0.0199142	17	4899418	4902932	chromosome 17 open reading frame 107 [Source:HGNC Symbol;Acc:HGNC:37238]
ENSG00000119927	GPAM	1.30482	0.000689531	0.0186949	10	112149864	112215377	glycerol-3-phosphate acyltransferase, mitochondrial [Source:HGNC Symbol;Acc:HGNC:24865]
ENSG00000007376	RPUSD1	1.30009	9.71711e-07	0.000234109	16	784974	788397	RNA pseudouridylate synthase domain containing 1 [Source:HGNC Symbol;Acc:HGNC:14173]
ENSG00000121406	ZNF549	1.29481	0.00113208	0.0256511	19	57527325	57557542	zinc finger protein 549 [Source:HGNC Symbol;Acc:HGNC:26632]
ENSG00000145476	CYP4V2	1.28862	0.00108828	0.0249556	4	186191520	186213456	cytochrome P450 family 4 subfamily V member 2 [Source:HGNC Symbol;Acc:HGNC:23198]
ENSG00000108469	RECQL5	1.28542	0.000170356	0.00720529	17	75626845	75667189	RecQ like helicase 5 [Source:HGNC Symbol;Acc:HGNC:9950]
ENSG00000260276	RP11-77H9.2	1.28352	0.00274756	0.0454361	16	8848105	8860456
ENSG00000163297	ANTXR2	1.28048	0.000426565	0.0133974	4	79901149	80125454	anthrax toxin receptor 2 [Source:HGNC Symbol;Acc:HGNC:21732]
ENSG00000186193	SAPCD2	1.27102	7.42459e-05	0.0041685	9	137062124	137070588	suppressor APC domain containing 2 [Source:HGNC Symbol;Acc:HGNC:28055]
ENSG00000165055	METTL2B	1.26988	0.000269653	0.00964083	7	128476729	128506602	methyltransferase like 2B [Source:HGNC Symbol;Acc:HGNC:18272]
ENSG00000147475	ERLIN2	1.26824	0.000603393	0.0171836	8	37736599	37759101	ER lipid raft associated 2 [Source:HGNC Symbol;Acc:HGNC:1356]
ENSG00000166979	EVA1C	1.26723	3.54531e-06	0.000567041	21	32412006	32515397	eva-1 homolog C [Source:HGNC Symbol;Acc:HGNC:13239]
ENSG00000090565	RAB11FIP3	1.26713	1.01704e-06	0.00023898	16	425619	523011	RAB11 family interacting protein 3 [Source:HGNC Symbol;Acc:HGNC:17224]
ENSG00000078237	TIGAR	1.26581	0.00132681	0.0283636	12	4307763	4354593	TP53 induced glycolysis regulatory phosphatase [Source:HGNC Symbol;Acc:HGNC:1185]
ENSG00000148300	REXO4	1.25896	2.46339e-05	0.00221042	9	133406059	133418096	REX4 homolog, 3'-5' exonuclease [Source:HGNC Symbol;Acc:HGNC:12820]
ENSG00000026559	KCNG1	1.25895	0.00105192	0.0244757	20	51003656	51023129	potassium voltage-gated channel modifier subfamily G member 1 [Source:HGNC Symbol;Acc:HGNC:6248]
ENSG00000149716	ORAOV1	1.25587	3.28994e-05	0.00258252	11	69653076	69675416	oral cancer overexpressed 1 [Source:HGNC Symbol;Acc:HGNC:17589]
ENSG00000122786	CALD1	1.24942	0.000926153	0.0225704	7	134744252	134970728	caldesmon 1 [Source:HGNC Symbol;Acc:HGNC:1441]
ENSG00000090612	ZNF268	1.24938	0.000993999	0.0234143	12	133181409	133214831	zinc finger protein 268 [Source:HGNC Symbol;Acc:HGNC:13061]
ENSG00000178295	GEN1	1.24638	0.000568054	0.0164814	2	17753858	17788941	GEN1, Holliday junction 5' flap endonuclease [Source:HGNC Symbol;Acc:HGNC:26881]
ENSG00000100350	FOXRED2	1.24435	0.0026556	0.0446547	22	36487190	36507101	FAD dependent oxidoreductase domain containing 2 [Source:HGNC Symbol;Acc:HGNC:26264]
ENSG00000167716	WDR81	1.24315	0.000437314	0.0136226	17	1716523	1738599	WD repeat domain 81 [Source:HGNC Symbol;Acc:HGNC:26600]
ENSG00000246922	UBAP1L	1.23614	0.00226266	0.0403297	15	65092770	65115197	ubiquitin associated protein 1 like [Source:HGNC Symbol;Acc:HGNC:40028]
ENSG00000025434	NR1H3	1.2358	0.000102477	0.00525393	11	47248300	47269032	nuclear receptor subfamily 1 group H member 3 [Source:HGNC Symbol;Acc:HGNC:7966]
ENSG00000033011	ALG1	1.23575	3.24338e-05	0.00256146	16	5033960	5087379	ALG1, chitobiosyldiphosphodolichol beta-mannosyltransferase [Source:HGNC Symbol;Acc:HGNC:18294]
ENSG00000162777	DENND2D	1.23565	0.00262623	0.0443916	1	111187174	111204535	DENN domain containing 2D [Source:HGNC Symbol;Acc:HGNC:26192]
ENSG00000179406	LINC00174	1.23562	0.00311258	0.0486386	7	66376044	66493566	long intergenic non-protein coding RNA 174 [Source:HGNC Symbol;Acc:HGNC:27788]
ENSG00000277734	TRAC	1.23048	0.000460812	0.014169	14	22547506	22552154	T-cell receptor alpha constant [Source:HGNC Symbol;Acc:HGNC:12029]
ENSG00000103248	MTHFSD	1.22728	8.41765e-05	0.00463011	16	86530176	86555235	methenyltetrahydrofolate synthetase domain containing [Source:HGNC Symbol;Acc:HGNC:25778]
ENSG00000010539	ZNF200	1.22292	0.000148591	0.00668591	16	3222325	3236221	zinc finger protein 200 [Source:HGNC Symbol;Acc:HGNC:12993]
ENSG00000083817	ZNF416	1.22228	0.00278896	0.0457212	19	57571566	57578927	zinc finger protein 416 [Source:HGNC Symbol;Acc:HGNC:20645]
ENSG00000156011	PSD3	1.21818	0.00192497	0.0361321	8	18527301	19084730	pleckstrin and Sec7 domain containing 3 [Source:HGNC Symbol;Acc:HGNC:19093]
ENSG00000166133	RPUSD2	1.21751	0.000425944	0.0133974	15	40569300	40574943	RNA pseudouridylate synthase domain containing 2 [Source:HGNC Symbol;Acc:HGNC:24180]
ENSG00000196873	CBWD3	1.2108	0.00137464	0.028942	9	68232003	68300015	COBW domain containing 3 [Source:HGNC Symbol;Acc:HGNC:18519]
ENSG00000163293	NIPAL1	1.21003	0.000932438	0.0226408	4	47914142	48040173	NIPA like domain containing 1 [Source:HGNC Symbol;Acc:HGNC:27194]
ENSG00000187720	THSD4	1.20841	0.000742268	0.0196217	15	71096952	71783383	thrombospondin type 1 domain containing 4 [Source:HGNC Symbol;Acc:HGNC:25835]
ENSG00000211584	SLC48A1	1.20589	0.000214391	0.00832146	12	47753916	47782753	solute carrier family 48 member 1 [Source:HGNC Symbol;Acc:HGNC:26035]
ENSG00000023909	GCLM	1.20233	0.00200793	0.0372326	1	93885205	93909456	glutamate-cysteine ligase modifier subunit [Source:HGNC Symbol;Acc:HGNC:4312]
ENSG00000175048	ZDHHC14	1.19985	0.00249164	0.0428783	6	157381133	157678146	zinc finger DHHC-type containing 14 [Source:HGNC Symbol;Acc:HGNC:20341]
ENSG00000184857	TMEM186	1.19794	0.00238416	0.0415928	16	8780384	8797648	transmembrane protein 186 [Source:HGNC Symbol;Acc:HGNC:24530]
ENSG00000103150	MLYCD	1.18787	0.00153111	0.0312009	16	83899126	83927026	malonyl-CoA decarboxylase [Source:HGNC Symbol;Acc:HGNC:7150]
ENSG00000183751	TBL3	1.18571	4.50337e-06	0.000643444	16	1972037	1982933	transducin beta like 3 [Source:HGNC Symbol;Acc:HGNC:11587]
ENSG00000110031	LPXN	1.18542	0.00153082	0.0312009	11	58526871	58578220	leupaxin [Source:HGNC Symbol;Acc:HGNC:14061]
ENSG00000198131	ZNF544	1.18484	0.000129493	0.00605841	19	58228594	58277495	zinc finger protein 544 [Source:HGNC Symbol;Acc:HGNC:16759]
ENSG00000198556	ZNF789	1.18424	0.00293284	0.0470664	7	99472841	99503650	zinc finger protein 789 [Source:HGNC Symbol;Acc:HGNC:27801]
ENSG00000233117	LINC00702	1.18419	0.00118089	0.0261652	10	4201141	4243912	long intergenic non-protein coding RNA 702 [Source:HGNC Symbol;Acc:HGNC:44676]
ENSG00000089335	ZNF302	1.18247	0.000126862	0.00600639	19	34677639	34686397	zinc finger protein 302 [Source:HGNC Symbol;Acc:HGNC:13848]
ENSG00000146842	TMEM209	1.18231	0.00169988	0.0334234	7	130164715	130207770	transmembrane protein 209 [Source:HGNC Symbol;Acc:HGNC:21898]
ENSG00000174516	PELI3	1.17417	0.00115407	0.0258172	11	66466327	66477337	pellino E3 ubiquitin protein ligase family member 3 [Source:HGNC Symbol;Acc:HGNC:30010]
ENSG00000171428	NAT1	1.17394	0.00014422	0.0066143	8	18170477	18223689	N-acetyltransferase 1 [Source:HGNC Symbol;Acc:HGNC:7645]
ENSG00000145194	ECE2	1.17265	0.00162509	0.0324899	3	184249650	184293031	endothelin converting enzyme 2 [Source:HGNC Symbol;Acc:HGNC:13275]
ENSG00000279821	RP11-1334A24.5	1.17143	0.00195341	0.0365219	5	177476631	177479656
ENSG00000198055	GRK6	1.17042	0.000147954	0.006673	5	177403204	177442901	G protein-coupled receptor kinase 6 [Source:HGNC Symbol;Acc:HGNC:4545]
ENSG00000189057	FAM111B	1.15209	0.000420678	0.0133003	11	59107185	59127410	family with sequence similarity 111 member B [Source:HGNC Symbol;Acc:HGNC:24200]
ENSG00000180071	ANKRD18A	1.1501	0.000469257	0.0143591	9	38571358	38620660	ankyrin repeat domain 18A [Source:HGNC Symbol;Acc:HGNC:23643]
ENSG00000103653	CSK	1.14577	5.87691e-05	0.00366695	15	74782057	74803198	c-src tyrosine kinase [Source:HGNC Symbol;Acc:HGNC:2444]
ENSG00000125454	SLC25A19	1.14368	0.00187774	0.0356218	17	75272981	75289510	solute carrier family 25 member 19 [Source:HGNC Symbol;Acc:HGNC:14409]
ENSG00000155275	TRMT44	1.14215	0.000650676	0.017996	4	8436140	8493531	tRNA methyltransferase 44 homolog (S. cerevisiae) [Source:HGNC Symbol;Acc:HGNC:26653]
ENSG00000168404	MLKL	1.14111	0.000806336	0.0205174	16	74671855	74700960	mixed lineage kinase domain like pseudokinase [Source:HGNC Symbol;Acc:HGNC:26617]
ENSG00000198917	SPOUT1	1.14045	5.57261e-05	0.00358323	9	128819651	128829821	SPOUT domain containing methyltransferase 1 [Source:HGNC Symbol;Acc:HGNC:26933]
ENSG00000166801	FAM111A	1.13252	4.45218e-05	0.00318565	11	59142748	59155039	family with sequence similarity 111 member A [Source:HGNC Symbol;Acc:HGNC:24725]
ENSG00000062725	APPBP2	1.13165	0.000186296	0.00752817	17	60443149	60526219	amyloid beta precursor protein binding protein 2 [Source:HGNC Symbol;Acc:HGNC:622]
ENSG00000196597	ZNF782	1.12698	2.53717e-05	0.00221236	9	96816472	96875623	zinc finger protein 782 [Source:HGNC Symbol;Acc:HGNC:33110]
ENSG00000100395	L3MBTL2	1.12486	0.001998	0.0371366	22	41205205	41231271	L3MBTL2 polycomb repressive complex 1 subunit [Source:HGNC Symbol;Acc:HGNC:18594]
ENSG00000159263	SIM2	1.12232	0.000869564	0.0214828	21	36699133	36749917	single-minded family bHLH transcription factor 2 [Source:HGNC Symbol;Acc:HGNC:10883]
ENSG00000271826	PLS3-AS1	1.1214	0.00130815	0.028261	X	115518182	115562731	PLS3 antisense RNA 1 [Source:HGNC Symbol;Acc:HGNC:50343]
ENSG00000166704	ZNF606	1.1209	0.000801969	0.0204336	19	57977053	58003349	zinc finger protein 606 [Source:HGNC Symbol;Acc:HGNC:25879]
ENSG00000136816	TOR1B	1.11621	2.9847e-06	0.00049398	9	129803153	129811281	torsin family 1 member B [Source:HGNC Symbol;Acc:HGNC:11995]
ENSG00000226419	SLC16A1-AS1	1.11554	0.000310962	0.0105497	1	112956415	113047055	SLC16A1 antisense RNA 1 [Source:HGNC Symbol;Acc:HGNC:49445]
ENSG00000047621	C12orf4	1.11509	0.000870238	0.0214828	12	4487728	4538508	chromosome 12 open reading frame 4 [Source:HGNC Symbol;Acc:HGNC:1184]
ENSG00000101452	DHX35	1.1087	6.13211e-05	0.00376885	20	38962299	39039723	DEAH-box helicase 35 [Source:HGNC Symbol;Acc:HGNC:15861]
ENSG00000166387	PPFIBP2	1.10787	0.000240539	0.00897681	11	7513298	7657127	PPFIA binding protein 2 [Source:HGNC Symbol;Acc:HGNC:9250]
ENSG00000176102	CSTF3	1.1067	0.00086988	0.0214828	11	33077188	33162371	cleavage stimulation factor subunit 3 [Source:HGNC Symbol;Acc:HGNC:2485]
ENSG00000127580	WDR24	1.106	1.51494e-05	0.00153371	16	684622	690444	WD repeat domain 24 [Source:HGNC Symbol;Acc:HGNC:20852]
ENSG00000106631	MYL7	1.10045	0.0022807	0.0404428	7	44138864	44141332	myosin light chain 7 [Source:HGNC Symbol;Acc:HGNC:21719]
ENSG00000196152	ZNF79	1.10006	0.000996372	0.0234412	9	127424374	127445372	zinc finger protein 79 [Source:HGNC Symbol;Acc:HGNC:13153]
ENSG00000168228	ZCCHC4	1.09515	0.00012812	0.0060509	4	25312785	25370383	zinc finger CCHC-type containing 4 [Source:HGNC Symbol;Acc:HGNC:22917]
ENSG00000095585	BLNK	1.0922	5.75865e-05	0.0036453	10	96191702	96271587	B-cell linker [Source:HGNC Symbol;Acc:HGNC:14211]
ENSG00000168569	TMEM223	1.0915	0.00171784	0.0336721	11	62771629	62792021	transmembrane protein 223 [Source:HGNC Symbol;Acc:HGNC:28464]
ENSG00000241288	RP11-379B18.5	1.08865	0.00150601	0.0308758	3	125827238	125916384
ENSG00000139437	TCHP	1.08686	0.00120963	0.0267087	12	109900264	109983841	trichoplein keratin filament binding [Source:HGNC Symbol;Acc:HGNC:28135]
ENSG00000168502	MTCL1	1.08133	6.96527e-06	0.000908014	18	8705661	8832778	microtubule crosslinking factor 1 [Source:HGNC Symbol;Acc:HGNC:29121]
ENSG00000164252	AGGF1	1.08037	0.000931394	0.0226408	5	77029251	77065234	angiogenic factor with G-patch and FHA domains 1 [Source:HGNC Symbol;Acc:HGNC:24684]
ENSG00000147679	UTP23	1.07775	0.00053181	0.0157417	8	116766503	116849463	UTP23, small subunit processome component [Source:HGNC Symbol;Acc:HGNC:28224]
ENSG00000063587	ZNF275	1.06631	0.000870038	0.0214828	X	153334155	153360110	zinc finger protein 275 [Source:HGNC Symbol;Acc:HGNC:13069]
ENSG00000103550	KNOP1	1.05948	0.000915271	0.0223912	16	19701934	19718235	lysine rich nucleolar protein 1 [Source:HGNC Symbol;Acc:HGNC:34404]
ENSG00000188315	C3orf62	1.0549	0.000317827	0.0106876	3	49268602	49277909	chromosome 3 open reading frame 62 [Source:HGNC Symbol;Acc:HGNC:24771]
ENSG00000124523	SIRT5	1.05436	0.000170324	0.00720529	6	13574529	13615158	sirtuin 5 [Source:HGNC Symbol;Acc:HGNC:14933]
ENSG00000117228	GBP1	1.05387	0.000342785	0.0112487	1	89052319	89065360	guanylate binding protein 1 [Source:HGNC Symbol;Acc:HGNC:4182]
ENSG00000183605	SFXN4	1.05319	0.00205706	0.0376524	10	119140767	119165667	sideroflexin 4 [Source:HGNC Symbol;Acc:HGNC:16088]
ENSG00000250565	ATP6V1E2	1.04993	0.000199957	0.00790789	2	46490750	46542557	ATPase H+ transporting V1 subunit E2 [Source:HGNC Symbol;Acc:HGNC:18125]
ENSG00000122484	RPAP2	1.04945	5.82105e-05	0.00366695	1	92298965	92402056	RNA polymerase II associated protein 2 [Source:HGNC Symbol;Acc:HGNC:25791]
ENSG00000102996	MMP15	1.0406	2.55589e-05	0.00221236	16	58025566	58046901	matrix metallopeptidase 15 [Source:HGNC Symbol;Acc:HGNC:7161]
ENSG00000068784	SRBD1	1.03818	9.64923e-05	0.00504479	2	45388680	45612165	S1 RNA binding domain 1 [Source:HGNC Symbol;Acc:HGNC:25521]
ENSG00000116198	CEP104	1.0374	0.000785433	0.0201689	1	3812081	3857214	centrosomal protein 104 [Source:HGNC Symbol;Acc:HGNC:24866]
ENSG00000128311	TST	1.03665	0.00111549	0.0254354	22	37010859	37020183	thiosulfate sulfurtransferase [Source:HGNC Symbol;Acc:HGNC:12388]
ENSG00000167994	RAB3IL1	1.03483	0.00306489	0.0483329	11	61897301	61920269	RAB3A interacting protein like 1 [Source:HGNC Symbol;Acc:HGNC:9780]
ENSG00000184208	C22orf46	1.03249	0.000818319	0.0207341	22	41688939	41698136	chromosome 22 open reading frame 46 [Source:HGNC Symbol;Acc:HGNC:26294]
ENSG00000152683	SLC30A6	1.03196	0.0020149	0.0372326	2	32165841	32224379	solute carrier family 30 member 6 [Source:HGNC Symbol;Acc:HGNC:19305]
ENSG00000116830	TTF2	1.03154	0.0014303	0.0297193	1	117060303	117107453	transcription termination factor 2 [Source:HGNC Symbol;Acc:HGNC:12398]
ENSG00000174177	CTU2	1.03094	0.000777613	0.0200275	16	88706463	88715386	cytosolic thiouridylase subunit 2 [Source:HGNC Symbol;Acc:HGNC:28005]
ENSG00000164674	SYTL3	1.03075	0.000956799	0.0228491	6	158650014	158764876	synaptotagmin like 3 [Source:HGNC Symbol;Acc:HGNC:15587]
ENSG00000159459	UBR1	1.03011	0.000164258	0.00713774	15	42942897	43106113	ubiquitin protein ligase E3 component n-recognin 1 [Source:HGNC Symbol;Acc:HGNC:16808]
ENSG00000167112	TRUB2	1.02808	3.36818e-05	0.00262732	9	128305161	128322742	TruB pseudouridine synthase family member 2 [Source:HGNC Symbol;Acc:HGNC:17170]
ENSG00000136933	RABEPK	1.02764	0.00190492	0.0359447	9	125200542	125234158	Rab9 effector protein with kelch motifs [Source:HGNC Symbol;Acc:HGNC:16896]
ENSG00000171067	C11orf24	1.02545	0.000145549	0.00664323	11	68261335	68272001	chromosome 11 open reading frame 24 [Source:HGNC Symbol;Acc:HGNC:1174]
ENSG00000103148	NPRL3	1.02128	0.000103916	0.00527423	16	84271	138860	NPR3 like, GATOR1 complex subunit [Source:HGNC Symbol;Acc:HGNC:14124]
ENSG00000186792	HYAL3	1.02018	0.00094013	0.0227075	3	50292831	50299468	hyaluronoglucosaminidase 3 [Source:HGNC Symbol;Acc:HGNC:5322]
ENSG00000125817	CENPB	1.01559	0.00114132	0.0257505	20	3783851	3786690	centromere protein B [Source:HGNC Symbol;Acc:HGNC:1852]
ENSG00000171840	NINJ2	1.01312	0.00114188	0.0257505	12	564296	663779	ninjurin 2 [Source:HGNC Symbol;Acc:HGNC:7825]
ENSG00000141219	C17orf80	1.01283	0.00169437	0.0333494	17	73232233	73248947	chromosome 17 open reading frame 80 [Source:HGNC Symbol;Acc:HGNC:29601]
ENSG00000131848	ZSCAN5A	1.01119	0.000555898	0.0163278	19	56219670	56368383	zinc finger and SCAN domain containing 5A [Source:HGNC Symbol;Acc:HGNC:23710]
ENSG00000138134	STAMBPL1	1.01027	0.00167646	0.0332212	10	88879734	88975153	STAM binding protein like 1 [Source:HGNC Symbol;Acc:HGNC:24105]
ENSG00000144579	CTDSP1	1.00966	5.10101e-06	0.000693483	2	218398256	218405941	CTD small phosphatase 1 [Source:HGNC Symbol;Acc:HGNC:21614]
ENSG00000176387	HSD11B2	1.009	0.00245455	0.0423933	16	67430652	67437553	hydroxysteroid 11-beta dehydrogenase 2 [Source:HGNC Symbol;Acc:HGNC:5209]
ENSG00000147471	PROSC	1.00694	0.000172293	0.00723899	8	37762593	37779767	proline synthetase cotranscribed homolog (bacterial) [Source:HGNC Symbol;Acc:HGNC:9457]
ENSG00000160703	NLRX1	1.00335	0.000751867	0.0197929	11	119166568	119184016	NLR family member X1 [Source:HGNC Symbol;Acc:HGNC:29890]
ENSG00000052723	SIKE1	0.999975	4.48051e-05	0.00319391	1	114769479	114780685	suppressor of IKBKE 1 [Source:HGNC Symbol;Acc:HGNC:26119]
ENSG00000101191	DIDO1	0.995339	0.00106322	0.0246483	20	62877738	62937952	death inducer-obliterator 1 [Source:HGNC Symbol;Acc:HGNC:2680]

## Sheet: GefR vs Control SCC24-PDX DOWN
Supplementary Table S1: Genes with downregulated expression in GefR SCC24-PDX vs Control SCC24-PDX (padj<0.05; FC>2)
ID	Gene Symbol	log2 Fold Change GefR vs Control SCC24-PDX	pvalue GefR vs Control SCC24-PDX	padj GefR vs Control SCC24-PDX	chromosome name	start position	end position	description
ENSG00000108342	CSF3	-7.56855	3.76304e-08	2.17036e-05	17	40015361	40017813	colony stimulating factor 3 [Source:HGNC Symbol;Acc:HGNC:2438]
ENSG00000130844	ZNF331	-6.17905	5.21614e-05	0.00343525	19	53520981	53580269	zinc finger protein 331 [Source:HGNC Symbol;Acc:HGNC:15489]
ENSG00000214460	TPT1P6	-5.84823	0.000133222	0.00616937	6	85427453	85427966	tumor protein, translationally-controlled 1 pseudogene 6 [Source:HGNC Symbol;Acc:HGNC:49297]
ENSG00000197406	DIO3	-5.84692	0.000263209	0.00952406	14	101561351	101563452	iodothyronine deiodinase 3 [Source:HGNC Symbol;Acc:HGNC:2885]
ENSG00000182195	LDOC1	-5.715	9.8366e-06	0.00111441	X	141175745	141177125	LDOC1, regulator of NFKB signaling [Source:HGNC Symbol;Acc:HGNC:6548]
ENSG00000130377	ACSBG2	-5.61062	0.000168806	0.00719409	19	6135247	6193094	acyl-CoA synthetase bubblegum family member 2 [Source:HGNC Symbol;Acc:HGNC:24174]
ENSG00000163739	CXCL1	-5.48979	1.53567e-08	1.16914e-05	4	73869393	73871242	C-X-C motif chemokine ligand 1 [Source:HGNC Symbol;Acc:HGNC:4602]
ENSG00000232810	TNF	-5.46804	2.81309e-08	1.78472e-05	6	31575567	31578336	tumor necrosis factor [Source:HGNC Symbol;Acc:HGNC:11892]
ENSG00000257539	HSPA8P14	-5.38978	0.000493862	0.0149201	12	111381867	111385638	heat shock protein family A (Hsp70) member 8 pseudogene 14 [Source:HGNC Symbol;Acc:HGNC:44929]
ENSG00000230533	RP11-95M15.1	-5.37186	0.000328615	0.0108774	6	137673378	137763984
ENSG00000090382	LYZ	-5.36168	0.000167714	0.00719409	12	69348341	69354234	lysozyme [Source:HGNC Symbol;Acc:HGNC:6740]
ENSG00000182383	RPL27AP5	-5.30885	0.000219061	0.00844005	5	74990189	74990637	ribosomal protein L27a pseudogene 5 [Source:HGNC Symbol;Acc:HGNC:36420]
ENSG00000066056	TIE1	-5.30567	0.00148064	0.0305632	1	43300993	43323108	tyrosine kinase with immunoglobulin like and EGF like domains 1 [Source:HGNC Symbol;Acc:HGNC:11809]
ENSG00000169429	CXCL8	-5.25583	4.10139e-09	5.57584e-06	4	73740506	73743716	C-X-C motif chemokine ligand 8 [Source:HGNC Symbol;Acc:HGNC:6025]
ENSG00000087303	NID2	-5.22262	0.00101523	0.0237965	14	52004803	52069228	nidogen 2 [Source:HGNC Symbol;Acc:HGNC:13389]
ENSG00000277632	CCL3	-5.18493	0.000185261	0.00750747	17	36088256	36090169	C-C motif chemokine ligand 3 [Source:HGNC Symbol;Acc:HGNC:10627]
ENSG00000247134	RP11-11N9.4	-5.15314	9.60928e-05	0.00504479	8	32996178	33044855
ENSG00000169245	CXCL10	-5.08381	0.000550361	0.0162152	4	76021117	76023497	C-X-C motif chemokine ligand 10 [Source:HGNC Symbol;Acc:HGNC:10637]
ENSG00000238137	ARPC3P2	-4.96232	0.0017878	0.0345564	1	211442274	211442806	actin related protein 2/3 complex subunit 3 pseudogene 2 [Source:HGNC Symbol;Acc:HGNC:39431]
ENSG00000250956	CTB-88F18.3	-4.85423	0.00176694	0.0343165	5	127179756	127179900
ENSG00000115009	CCL20	-4.79993	1.24138e-06	0.000271577	2	227813842	227817564	C-C motif chemokine ligand 20 [Source:HGNC Symbol;Acc:HGNC:10619]
ENSG00000123689	G0S2	-4.7934	6.48368e-13	5.30229e-09	1	209675420	209676388	G0/G1 switch 2 [Source:HGNC Symbol;Acc:HGNC:30229]
ENSG00000173391	OLR1	-4.79082	1.01923e-07	4.51141e-05	12	10158301	10172138	oxidized low density lipoprotein receptor 1 [Source:HGNC Symbol;Acc:HGNC:8133]
ENSG00000163121	NEURL3	-4.78231	2.79113e-07	9.51922e-05	2	96497643	96508109	neuralized E3 ubiquitin protein ligase 3 [Source:HGNC Symbol;Acc:HGNC:25162]
ENSG00000227507	LTB	-4.77321	7.15187e-06	0.000915516	6	31580525	31582522	lymphotoxin beta [Source:HGNC Symbol;Acc:HGNC:6711]
ENSG00000116996	ZP4	-4.72373	0.00144809	0.0300235	1	237877864	237890922	zona pellucida glycoprotein 4 [Source:HGNC Symbol;Acc:HGNC:15770]
ENSG00000225142	RP11-490K7.1	-4.71849	0.00216515	0.0389965	1	31108188	31108623
ENSG00000271503	CCL5	-4.71017	6.2573e-08	3.03863e-05	17	35871491	35880793	C-C motif chemokine ligand 5 [Source:HGNC Symbol;Acc:HGNC:10632]
ENSG00000248415	GAPDHP61	-4.59271	0.00154632	0.0314436	15	64528667	64529671	glyceraldehyde 3 phosphate dehydrogenase pseudogene 61 [Source:HGNC Symbol;Acc:HGNC:4155]
ENSG00000130508	PXDN	-4.52759	0.000208318	0.00812484	2	1631887	1744852	peroxidasin [Source:HGNC Symbol;Acc:HGNC:14966]
ENSG00000160883	HK3	-4.4754	0.00276562	0.0454663	5	176880869	176899332	hexokinase 3 [Source:HGNC Symbol;Acc:HGNC:4925]
ENSG00000233237	LINC00472	-4.45179	0.00133188	0.028387	6	71344344	71420769	long intergenic non-protein coding RNA 472 [Source:HGNC Symbol;Acc:HGNC:21380]
ENSG00000243649	CFB	-4.36461	4.1346e-06	0.000629551	6	31945650	31952084	complement factor B [Source:HGNC Symbol;Acc:HGNC:1037]
ENSG00000122870	BICC1	-4.33579	0.0013278	0.0283636	10	58513140	58831437	BicC family RNA binding protein 1 [Source:HGNC Symbol;Acc:HGNC:19351]
ENSG00000215899	RP11-439L8.2	-4.33349	0.000115106	0.00563189	1	31487589	31488930
ENSG00000133110	POSTN	-4.31352	2.50812e-05	0.00221236	13	37562583	37598844	periostin [Source:HGNC Symbol;Acc:HGNC:16953]
ENSG00000146530	VWDE	-4.29112	0.00128061	0.0277917	7	12330885	12403941	von Willebrand factor D and EGF domains [Source:HGNC Symbol;Acc:HGNC:21897]
ENSG00000275611	RP11-291I6.2	-4.24754	1.69982e-05	0.00167631	13	110429026	110429342
ENSG00000224279	RPS29P31	-4.20304	0.000838693	0.0210392	22	38574931	38575431	ribosomal protein S29 pseudogene 31 [Source:HGNC Symbol;Acc:HGNC:52364]
ENSG00000163734	CXCL3	-4.19173	7.46858e-06	0.000935194	4	74036589	74038807	C-X-C motif chemokine ligand 3 [Source:HGNC Symbol;Acc:HGNC:4604]
ENSG00000234017	RP11-214N15.5	-4.17302	0.000326984	0.0108423	10	112548632	112548872
ENSG00000168542	COL3A1	-4.15164	2.34324e-05	0.00212376	2	188974320	189012746	collagen type III alpha 1 chain [Source:HGNC Symbol;Acc:HGNC:2201]
ENSG00000244485	RPL18P13	-4.14016	0.00233434	0.0410244	16	76235055	76235623	ribosomal protein L18 pseudogene 13 [Source:HGNC Symbol;Acc:HGNC:35599]
ENSG00000115155	OTOF	-4.1338	0.00280466	0.0458231	2	26457203	26558698	otoferlin [Source:HGNC Symbol;Acc:HGNC:8515]
ENSG00000203914	HSP90B3P	-4.09695	0.00309478	0.0484798	1	91642516	91644082	heat shock protein 90 beta family member 3, pseudogene [Source:HGNC Symbol;Acc:HGNC:12100]
ENSG00000000971	CFH	-4.08479	4.96618e-05	0.00339901	1	196651878	196747504	complement factor H [Source:HGNC Symbol;Acc:HGNC:4883]
ENSG00000235817	RP11-543E8.2	-4.07191	0.000302686	0.010343	1	230612009	230612412
ENSG00000239622	CTA-242H14.1	-4.04999	0.00170878	0.0335291	7	25689580	25689959
ENSG00000164400	CSF2	-4.04974	8.35752e-13	5.30229e-09	5	132073790	132076170	colony stimulating factor 2 [Source:HGNC Symbol;Acc:HGNC:2434]
ENSG00000267121	CTD-2020K17.1	-4.006	1.27639e-05	0.00135718	17	45190931	45222222
ENSG00000122691	TWIST1	-4.0047	0.00228017	0.0404428	7	19020991	19117672	twist family bHLH transcription factor 1 [Source:HGNC Symbol;Acc:HGNC:12428]
ENSG00000248159	HSPA8P11	-4.00288	0.000768064	0.0199142	8	30237382	30240997	heat shock protein family A (Hsp70) member 8 pseudogene 11 [Source:HGNC Symbol;Acc:HGNC:44926]
ENSG00000165496	RPL10L	-3.99219	0.000117314	0.00569599	14	46651010	46651821	ribosomal protein L10 like [Source:HGNC Symbol;Acc:HGNC:17976]
ENSG00000164692	COL1A2	-3.98354	1.56764e-05	0.00157036	7	94394561	94431232	collagen type I alpha 2 chain [Source:HGNC Symbol;Acc:HGNC:2198]
ENSG00000270332	SMC2-AS1	-3.89812	0.00148215	0.0305632	9	104080024	104093073	SMC2 antisense RNA 1 (head to head) [Source:HGNC Symbol;Acc:HGNC:50827]
ENSG00000196549	MME	-3.83976	1.82884e-06	0.000371419	3	155024124	155183729	membrane metalloendopeptidase [Source:HGNC Symbol;Acc:HGNC:7154]
ENSG00000168621	GDNF	-3.78969	1.46159e-07	6.04748e-05	5	37812677	37839686	glial cell derived neurotrophic factor [Source:HGNC Symbol;Acc:HGNC:4232]
ENSG00000137959	IFI44L	-3.7853	1.5131e-06	0.000319986	1	78619922	78646145	interferon induced protein 44 like [Source:HGNC Symbol;Acc:HGNC:17817]
ENSG00000187479	C11orf96	-3.77316	0.000253313	0.00931573	11	43925342	43944338	chromosome 11 open reading frame 96 [Source:HGNC Symbol;Acc:HGNC:38675]
ENSG00000162878	PKDCC	-3.75918	0.00031602	0.0106457	2	42048020	42058528	protein kinase domain containing, cytoplasmic [Source:HGNC Symbol;Acc:HGNC:25123]
ENSG00000240371	RPS4XP13	-3.75846	0.00173924	0.0339867	11	57576292	57577080	ribosomal protein S4X pseudogene 13 [Source:HGNC Symbol;Acc:HGNC:36522]
ENSG00000117115	PADI2	-3.68902	7.39844e-05	0.0041685	1	17066761	17119435	peptidyl arginine deiminase 2 [Source:HGNC Symbol;Acc:HGNC:18341]
ENSG00000214144	RP11-488L18.1	-3.67567	0.00031354	0.0105996	1	247229940	247231880
ENSG00000141506	PIK3R5	-3.66693	0.00149125	0.0307175	17	8878911	8965712	phosphoinositide-3-kinase regulatory subunit 5 [Source:HGNC Symbol;Acc:HGNC:30035]
ENSG00000008517	IL32	-3.63834	2.0727e-07	7.73522e-05	16	3065297	3082192	interleukin 32 [Source:HGNC Symbol;Acc:HGNC:16830]
ENSG00000236148	RPL23AP37	-3.61951	0.00257993	0.0437646	2	64347193	64347741	ribosomal protein L23a pseudogene 37 [Source:HGNC Symbol;Acc:HGNC:35664]
ENSG00000177359	OVOS2	-3.61312	0.000200678	0.00790789	12	31111652	31206154
ENSG00000100985	MMP9	-3.57907	5.17972e-05	0.00343525	20	46008908	46016561	matrix metallopeptidase 9 [Source:HGNC Symbol;Acc:HGNC:7176]
ENSG00000003989	SLC7A2	-3.51175	2.0901e-06	0.000414222	8	17497088	17570573	solute carrier family 7 member 2 [Source:HGNC Symbol;Acc:HGNC:11060]
ENSG00000250746	RP11-39C10.1	-3.49521	0.000236465	0.00891216	4	164188311	164190367
ENSG00000183625	CCR3	-3.48193	5.06646e-05	0.00339901	3	46163604	46266706	C-C motif chemokine receptor 3 [Source:HGNC Symbol;Acc:HGNC:1604]
ENSG00000176399	DMRTA1	-3.45057	1.41731e-05	0.00145031	9	22446841	22455740	DMRT like family A1 [Source:HGNC Symbol;Acc:HGNC:13826]
ENSG00000137745	MMP13	-3.43803	4.0727e-07	0.000121202	11	102942995	102955734	matrix metallopeptidase 13 [Source:HGNC Symbol;Acc:HGNC:7159]
ENSG00000200879	SNORD14E	-3.41367	0.000694713	0.0187819	11	123058077	123058161	small nucleolar RNA, C/D box 14E [Source:HGNC Symbol;Acc:HGNC:30354]
ENSG00000128342	LIF	-3.41139	0.000651413	0.017996	22	30240447	30246851	leukemia inhibitory factor [Source:HGNC Symbol;Acc:HGNC:6596]
ENSG00000008056	SYN1	-3.4109	0.00117042	0.0260544	X	47571898	47619943	synapsin I [Source:HGNC Symbol;Acc:HGNC:11494]
ENSG00000215093	EEF1A1P29	-3.34951	0.000171646	0.00723361	X	86160264	86161359	eukaryotic translation elongation factor 1 alpha 1 pseudogene 29 [Source:HGNC Symbol;Acc:HGNC:37904]
ENSG00000229152	ANKRD10-IT1	-3.32285	8.09857e-07	0.000203526	13	110894639	110899172	ANKRD10 intronic transcript 1 [Source:HGNC Symbol;Acc:HGNC:39891]
ENSG00000136688	IL36G	-3.32251	8.26254e-05	0.00457154	2	112973203	112985665	interleukin 36, gamma [Source:HGNC Symbol;Acc:HGNC:15741]
ENSG00000237749	RP3-423B22.5	-3.32014	0.000423161	0.0133345	1	37556247	37556499
ENSG00000008118	CAMK1G	-3.31206	1.00812e-06	0.00023898	1	209583717	209613938	calcium/calmodulin dependent protein kinase IG [Source:HGNC Symbol;Acc:HGNC:14585]
ENSG00000224773	HSPA8P7	-3.30716	0.00320217	0.0493783	X	114774828	114776775	heat shock protein family A (Hsp70) member 8 pseudogene 7 [Source:HGNC Symbol;Acc:HGNC:44922]
ENSG00000223962	UBBP3	-3.29896	0.00043298	0.0135319	2	148863564	148863804	ubiquitin B pseudogene 3 [Source:HGNC Symbol;Acc:HGNC:12466]
ENSG00000241478	HSPA8P9	-3.26616	0.00178837	0.0345564	3	137880295	137882237	heat shock protein family A (Hsp70) member 8 pseudogene 9 [Source:HGNC Symbol;Acc:HGNC:44924]
ENSG00000198771	RCSD1	-3.25504	4.49094e-06	0.000643444	1	167630093	167706249	RCSD domain containing 1 [Source:HGNC Symbol;Acc:HGNC:28310]
ENSG00000081041	CXCL2	-3.24436	2.44151e-06	0.000438388	4	74097035	74099293	C-X-C motif chemokine ligand 2 [Source:HGNC Symbol;Acc:HGNC:4603]
ENSG00000241429	EEF1A1P25	-3.22684	0.00219621	0.0393972	3	138825063	138826329	eukaryotic translation elongation factor 1 alpha 1 pseudogene 25 [Source:HGNC Symbol;Acc:HGNC:37898]
ENSG00000112299	VNN1	-3.21796	0.000918252	0.0224065	6	132681590	132714049	vanin 1 [Source:HGNC Symbol;Acc:HGNC:12705]
ENSG00000111885	MAN1A1	-3.194	2.65889e-07	9.37162e-05	6	119177209	119349761	mannosidase alpha class 1A member 1 [Source:HGNC Symbol;Acc:HGNC:6821]
ENSG00000165757	KIAA1462	-3.18283	2.8008e-07	9.51922e-05	10	30012800	30115494	KIAA1462 [Source:HGNC Symbol;Acc:HGNC:29283]
ENSG00000197249	SERPINA1	-3.17819	0.00108744	0.0249556	14	94376747	94390693	serpin family A member 1 [Source:HGNC Symbol;Acc:HGNC:8941]
ENSG00000169418	NPR1	-3.17582	9.66339e-05	0.00504479	1	153678637	153693992	natriuretic peptide receptor 1 [Source:HGNC Symbol;Acc:HGNC:7943]
ENSG00000131669	NINJ1	-3.17009	3.16705e-07	0.000104525	9	93121489	93134288	ninjurin 1 [Source:HGNC Symbol;Acc:HGNC:7824]
ENSG00000184828	ZBTB7C	-3.16745	0.000395512	0.0126305	18	48026673	48410752	zinc finger and BTB domain containing 7C [Source:HGNC Symbol;Acc:HGNC:31700]
ENSG00000263563	UBBP4	-3.15466	9.01083e-05	0.00479059	17	22202995	22205154	ubiquitin B pseudogene 4 [Source:HGNC Symbol;Acc:HGNC:12467]
ENSG00000117009	KMO	-3.15331	4.55976e-05	0.00322624	1	241532134	241595642	kynurenine 3-monooxygenase [Source:HGNC Symbol;Acc:HGNC:6381]
ENSG00000026025	VIM	-3.12458	1.47349e-15	2.80449e-11	10	17228259	17237593	vimentin [Source:HGNC Symbol;Acc:HGNC:12692]
ENSG00000213303	CTC-398G3.2	-3.0857	0.00163653	0.0326158	19	11523436	11523831
ENSG00000165685	TMEM52B	-3.07793	8.94513e-05	0.00479059	12	10170542	10191801	transmembrane protein 52B [Source:HGNC Symbol;Acc:HGNC:26438]
ENSG00000205683	DPF3	-3.06143	6.36636e-07	0.000171787	14	72619296	72894116	double PHD fingers 3 [Source:HGNC Symbol;Acc:HGNC:17427]
ENSG00000166670	MMP10	-3.05158	5.86153e-07	0.000161685	11	102770503	102780628	matrix metallopeptidase 10 [Source:HGNC Symbol;Acc:HGNC:7156]
ENSG00000230037	UBBP1	-3.05097	0.000916914	0.0224026	2	136329441	136329913	ubiquitin B pseudogene 1 [Source:HGNC Symbol;Acc:HGNC:12464]
ENSG00000257907	EEF1A1P17	-3.04047	0.000179274	0.0073696	12	43659827	43661101	eukaryotic translation elongation factor 1 alpha 1 pseudogene 17 [Source:HGNC Symbol;Acc:HGNC:37890]
ENSG00000269926	RP11-442H21.2	-3.03674	0.00280481	0.0458231	10	72274915	72275980
ENSG00000104237	RP1	-3.03499	0.000193581	0.00771389	8	54554361	54871720	RP1, axonemal microtubule associated [Source:HGNC Symbol;Acc:HGNC:10263]
ENSG00000124785	NRN1	-3.03282	6.19357e-05	0.00377828	6	5997999	6007605	neuritin 1 [Source:HGNC Symbol;Acc:HGNC:17972]
ENSG00000173432	SAA1	-3.01881	3.50113e-05	0.00268698	11	18266174	18269977	serum amyloid A1 [Source:HGNC Symbol;Acc:HGNC:10513]
ENSG00000243746	EEF1A1P10	-3.0184	0.00108552	0.0249526	7	144647186	144648575	eukaryotic translation elongation factor 1 alpha 1 pseudogene 10 [Source:HGNC Symbol;Acc:HGNC:3205]
ENSG00000105509	HAS1	-3.01557	0.00256169	0.0436391	19	51713112	51723994	hyaluronan synthase 1 [Source:HGNC Symbol;Acc:HGNC:4818]
ENSG00000181449	SOX2	-3.00858	1.18616e-06	0.00026336	3	181711924	181714436	SRY-box 2 [Source:HGNC Symbol;Acc:HGNC:11195]
ENSG00000232587	EEF1A1P3	-3.00796	4.3452e-05	0.00312599	13	28214513	28215897	eukaryotic translation elongation factor 1 alpha 1 pseudogene 3 [Source:HGNC Symbol;Acc:HGNC:3194]
ENSG00000235947	EGOT	-3.00293	0.000623218	0.0174349	3	4749192	4751590	eosinophil granule ontogeny transcript (non-protein coding) [Source:HGNC Symbol;Acc:HGNC:37129]
ENSG00000184371	CSF1	-2.99029	4.76721e-08	2.5204e-05	1	109910242	109930992	colony stimulating factor 1 [Source:HGNC Symbol;Acc:HGNC:2432]
ENSG00000214019	RP6-218J18.2	-2.98992	0.000944331	0.0227459	X	44029332	44030921
ENSG00000261557	EEF1A1P38	-2.98101	0.000144681	0.00661951	16	27133483	27135179	eukaryotic translation elongation factor 1 alpha 1 pseudogene 38 [Source:HGNC Symbol;Acc:HGNC:37916]
ENSG00000155918	RAET1L	-2.98047	5.07303e-06	0.000693483	6	150018334	150025532	retinoic acid early transcript 1L [Source:HGNC Symbol;Acc:HGNC:16798]
ENSG00000168209	DDIT4	-2.97524	1.12469e-07	4.86503e-05	10	72273920	72276036	DNA damage inducible transcript 4 [Source:HGNC Symbol;Acc:HGNC:24944]
ENSG00000256128	LINC00944	-2.97115	2.19185e-05	0.00205057	12	126729787	126772411	long intergenic non-protein coding RNA 944 [Source:HGNC Symbol;Acc:HGNC:48640]
ENSG00000100906	NFKBIA	-2.96327	1.27741e-06	0.000273179	14	35401511	35404749	NFKB inhibitor alpha [Source:HGNC Symbol;Acc:HGNC:7797]
ENSG00000213235	EEF1A1P16	-2.92779	0.000206359	0.0080883	12	16990670	16992083	eukaryotic translation elongation factor 1 alpha 1 pseudogene 16 [Source:HGNC Symbol;Acc:HGNC:37889]
ENSG00000261553	RP11-29G8.3	-2.9271	0.000267886	0.00963831	13	75549773	75807120
ENSG00000154175	ABI3BP	-2.9101	0.000123848	0.00590778	3	100749156	100993515	ABI family member 3 binding protein [Source:HGNC Symbol;Acc:HGNC:17265]
ENSG00000185215	TNFAIP2	-2.90952	0.000564162	0.0164492	14	103123442	103137439	TNF alpha induced protein 2 [Source:HGNC Symbol;Acc:HGNC:11895]
ENSG00000112096	SOD2	-2.90843	1.18999e-06	0.00026336	6	159669057	159762529	superoxide dismutase 2 [Source:HGNC Symbol;Acc:HGNC:11180]
ENSG00000153071	DAB2	-2.894	7.11272e-09	7.52091e-06	5	39371675	39462300	DAB2, clathrin adaptor protein [Source:HGNC Symbol;Acc:HGNC:2662]
ENSG00000079819	EPB41L2	-2.88093	0.00252801	0.0433295	6	130839347	131063322	erythrocyte membrane protein band 4.1 like 2 [Source:HGNC Symbol;Acc:HGNC:3379]
ENSG00000146674	IGFBP3	-2.87549	5.06527e-05	0.00339901	7	45912245	45921874	insulin like growth factor binding protein 3 [Source:HGNC Symbol;Acc:HGNC:5472]
ENSG00000170075	GPR37L1	-2.86501	0.000361018	0.0117057	1	202122858	202133592	G protein-coupled receptor 37 like 1 [Source:HGNC Symbol;Acc:HGNC:14923]
ENSG00000091656	ZFHX4	-2.8502	0.000182337	0.00744727	8	76681219	76867285	zinc finger homeobox 4 [Source:HGNC Symbol;Acc:HGNC:30939]
ENSG00000073861	TBX21	-2.84593	8.10552e-06	0.000977002	17	47733244	47746119	T-box 21 [Source:HGNC Symbol;Acc:HGNC:11599]
ENSG00000115919	KYNU	-2.8449	3.70832e-05	0.00277876	2	142877498	143055832	kynureninase [Source:HGNC Symbol;Acc:HGNC:6469]
ENSG00000219433	BTBD10P2	-2.8348	0.00160697	0.032352	6	149794763	149795746	BTB domain containing 10 pseudogene 2 [Source:HGNC Symbol;Acc:HGNC:51541]
ENSG00000217027	TPT1P4	-2.83282	0.0019203	0.0360799	6	144200447	144200965	tumor protein, translationally-controlled 1 pseudogene 4 [Source:HGNC Symbol;Acc:HGNC:49298]
ENSG00000125726	CD70	-2.81779	0.0001082	0.00537695	19	6583183	6604103	CD70 molecule [Source:HGNC Symbol;Acc:HGNC:11937]
ENSG00000235531	MSC-AS1	-2.81583	2.75082e-05	0.00231666	8	71828167	72118393	MSC antisense RNA 1 [Source:HGNC Symbol;Acc:HGNC:48724]
ENSG00000106070	GRB10	-2.81498	1.62007e-05	0.00160598	7	50590063	50793462	growth factor receptor bound protein 10 [Source:HGNC Symbol;Acc:HGNC:4564]
ENSG00000166415	WDR72	-2.80528	0.000103025	0.00525393	15	53513741	53762878	WD repeat domain 72 [Source:HGNC Symbol;Acc:HGNC:26790]
ENSG00000251169	LINC01843	-2.79831	7.19507e-05	0.00416317	5	134506552	134509229	long intergenic non-protein coding RNA 1843 [Source:HGNC Symbol;Acc:HGNC:52659]
ENSG00000184588	PDE4B	-2.78546	4.20698e-06	0.000630724	1	65792514	66374579	phosphodiesterase 4B [Source:HGNC Symbol;Acc:HGNC:8781]
ENSG00000177707	NECTIN3	-2.77713	2.07823e-12	9.88874e-09	3	111070071	111275563	nectin cell adhesion molecule 3 [Source:HGNC Symbol;Acc:HGNC:17664]
ENSG00000129757	CDKN1C	-2.77314	0.00232382	0.0408772	11	2883213	2885881	cyclin dependent kinase inhibitor 1C [Source:HGNC Symbol;Acc:HGNC:1786]
ENSG00000137571	SLCO5A1	-2.76319	0.000869719	0.0214828	8	69667047	69835064	solute carrier organic anion transporter family member 5A1 [Source:HGNC Symbol;Acc:HGNC:19046]
ENSG00000172478	C2orf54	-2.7431	2.73429e-06	0.000473106	2	240886048	240896889	chromosome 2 open reading frame 54 [Source:HGNC Symbol;Acc:HGNC:26216]
ENSG00000270640	RP11-373D23.2	-2.74226	7.40247e-05	0.0041685	2	28396815	28397110
ENSG00000158859	ADAMTS4	-2.74172	0.0013189	0.0283057	1	161184308	161199056	ADAM metallopeptidase with thrombospondin type 1 motif 4 [Source:HGNC Symbol;Acc:HGNC:220]
ENSG00000241112	RPL29P14	-2.69146	2.91756e-05	0.00235296	5	149545383	149545810	ribosomal protein L29 pseudogene 14 [Source:HGNC Symbol;Acc:HGNC:36687]
ENSG00000237265	RP11-402P6.9	-2.67592	0.00208993	0.038089	X	71662998	71666767
ENSG00000162654	GBP4	-2.67184	0.00017988	0.00737857	1	89181148	89198932	guanylate binding protein 4 [Source:HGNC Symbol;Acc:HGNC:20480]
ENSG00000174502	SLC26A9	-2.64846	4.20858e-06	0.000630724	1	205913048	205943460	solute carrier family 26 member 9 [Source:HGNC Symbol;Acc:HGNC:14469]
ENSG00000130226	DPP6	-2.62827	8.05151e-06	0.000977002	7	153887097	154894285	dipeptidyl peptidase like 6 [Source:HGNC Symbol;Acc:HGNC:3010]
ENSG00000140379	BCL2A1	-2.6245	0.00115197	0.0258172	15	79960889	79971446	BCL2 related protein A1 [Source:HGNC Symbol;Acc:HGNC:991]
ENSG00000109846	CRYAB	-2.62204	6.97059e-05	0.00410747	11	111908565	111923722	crystallin alpha B [Source:HGNC Symbol;Acc:HGNC:2389]
ENSG00000233057	EEF1A1P14	-2.60989	0.00131863	0.0283057	1	194188967	194190342	eukaryotic translation elongation factor 1 alpha 1 pseudogene 14 [Source:HGNC Symbol;Acc:HGNC:3197]
ENSG00000130600	H19	-2.60838	0.000178122	0.007354	11	1995163	2001470	H19, imprinted maternally expressed transcript (non-protein coding) [Source:HGNC Symbol;Acc:HGNC:4713]
ENSG00000169554	ZEB2	-2.60741	2.89517e-05	0.00235296	2	144364364	144524583	zinc finger E-box binding homeobox 2 [Source:HGNC Symbol;Acc:HGNC:14881]
ENSG00000199477	SNORA31	-2.59948	0.0021529	0.0388487	13	45337480	45337609	small nucleolar RNA, H/ACA box 31 [Source:HGNC Symbol;Acc:HGNC:32621]
ENSG00000121966	CXCR4	-2.59903	0.000188133	0.00757875	2	136114349	136118165	C-X-C motif chemokine receptor 4 [Source:HGNC Symbol;Acc:HGNC:2561]
ENSG00000053524	MCF2L2	-2.59182	0.000104845	0.00529316	3	183178043	183428778	MCF.2 cell line derived transforming sequence-like 2 [Source:HGNC Symbol;Acc:HGNC:30319]
ENSG00000162891	IL20	-2.5867	1.53308e-06	0.000320649	1	206865354	206869223	interleukin 20 [Source:HGNC Symbol;Acc:HGNC:6002]
ENSG00000230316	FEZF1-AS1	-2.56476	4.07667e-06	0.000625737	7	122303658	122310077	FEZF1 antisense RNA 1 [Source:HGNC Symbol;Acc:HGNC:41001]
ENSG00000166920	C15orf48	-2.56089	2.32943e-05	0.00212134	15	45430529	45448761	chromosome 15 open reading frame 48 [Source:HGNC Symbol;Acc:HGNC:29898]
ENSG00000276712	MIR7111	-2.55475	0.00286879	0.0464058	6	35470508	35470579	microRNA 7111 [Source:HGNC Symbol;Acc:HGNC:50073]
ENSG00000229124	VIM-AS1	-2.55396	3.564e-05	0.00272424	10	17214239	17229985	VIM antisense RNA 1 [Source:HGNC Symbol;Acc:HGNC:44879]
ENSG00000076716	GPC4	-2.55371	0.00256566	0.0436391	X	133300103	133415490	glypican 4 [Source:HGNC Symbol;Acc:HGNC:4452]
ENSG00000266709	RP11-214O1.2	-2.54551	1.18735e-06	0.00026336	17	14303854	14305505
ENSG00000242992	FTH1P4	-2.54388	0.00215338	0.0388487	3	128764466	128765018	ferritin heavy chain 1 pseudogene 4 [Source:HGNC Symbol;Acc:HGNC:3991]
ENSG00000184347	SLIT3	-2.54074	4.18999e-05	0.00304382	5	168661733	169301129	slit guidance ligand 3 [Source:HGNC Symbol;Acc:HGNC:11087]
ENSG00000215895	RP11-334L9.1	-2.53578	0.0032593	0.0498668	1	38708931	38710890
ENSG00000136244	IL6	-2.53333	8.85217e-09	8.62851e-06	7	22725884	22732002	interleukin 6 [Source:HGNC Symbol;Acc:HGNC:6018]
ENSG00000278493	CTD-2382E5.6	-2.52831	7.4469e-07	0.000196857	15	41908204	41908714
ENSG00000249378	LINC01060	-2.51557	0.00276063	0.0454663	4	188400736	188681051	long intergenic non-protein coding RNA 1060 [Source:HGNC Symbol;Acc:HGNC:49081]
ENSG00000176692	FOXC2	-2.51542	8.22736e-06	0.000984851	16	86567251	86569728	forkhead box C2 [Source:HGNC Symbol;Acc:HGNC:3801]
ENSG00000157502	MUM1L1	-2.51438	2.58054e-05	0.00221241	X	106168305	106208956	MUM1 like 1 [Source:HGNC Symbol;Acc:HGNC:26583]
ENSG00000143556	S100A7	-2.49683	5.7023e-05	0.00363729	1	153457744	153460701	S100 calcium binding protein A7 [Source:HGNC Symbol;Acc:HGNC:10497]
ENSG00000235852	AC005540.3	-2.49542	0.00204021	0.0375181	2	190880797	190882059
ENSG00000229091	HSPA8P8	-2.49387	0.00153809	0.0313097	7	10451311	10453252	heat shock protein family A (Hsp70) member 8 pseudogene 8 [Source:HGNC Symbol;Acc:HGNC:44923]
ENSG00000167244	IGF2	-2.48895	0.000226964	0.00865692	11	2129112	2141238	insulin like growth factor 2 [Source:HGNC Symbol;Acc:HGNC:5466]
ENSG00000125735	TNFSF14	-2.46772	0.00300809	0.0479104	19	6661253	6670588	tumor necrosis factor superfamily member 14 [Source:HGNC Symbol;Acc:HGNC:11930]
ENSG00000178860	MSC	-2.4518	0.000307853	0.0104819	8	71841549	71844468	musculin [Source:HGNC Symbol;Acc:HGNC:7321]
ENSG00000204388	HSPA1B	-2.45176	0.000617407	0.017409	6	31827735	31830255	heat shock protein family A (Hsp70) member 1B [Source:HGNC Symbol;Acc:HGNC:5233]
ENSG00000137965	IFI44	-2.45127	9.00208e-06	0.00105114	1	78649796	78664078	interferon induced protein 44 [Source:HGNC Symbol;Acc:HGNC:16938]
ENSG00000214203	RPS4XP1	-2.45076	0.00175959	0.0342786	12	100009052	100009838	ribosomal protein S4X pseudogene 1 [Source:HGNC Symbol;Acc:HGNC:32444]
ENSG00000064205	WISP2	-2.41672	0.00276213	0.0454663	20	44714844	44728509	WNT1 inducible signaling pathway protein 2 [Source:HGNC Symbol;Acc:HGNC:12770]
ENSG00000255491	RP11-1082L8.3	-2.4093	0.00125135	0.0274704	8	124811226	124857516
ENSG00000138829	FBN2	-2.38149	9.03993e-07	0.000220586	5	128257909	128659185	fibrillin 2 [Source:HGNC Symbol;Acc:HGNC:3604]
ENSG00000169085	C8orf46	-2.36978	0.000137386	0.00633141	8	66460003	66518524	chromosome 8 open reading frame 46 [Source:HGNC Symbol;Acc:HGNC:28498]
ENSG00000125895	TMEM74B	-2.35021	0.00240605	0.0419362	20	1180561	1185415	transmembrane protein 74B [Source:HGNC Symbol;Acc:HGNC:15893]
ENSG00000128917	DLL4	-2.34468	0.0013701	0.0288783	15	40929340	40939072	delta like canonical Notch ligand 4 [Source:HGNC Symbol;Acc:HGNC:2910]
ENSG00000120068	HOXB8	-2.34294	8.10264e-05	0.00449614	17	48611377	48614939	homeobox B8 [Source:HGNC Symbol;Acc:HGNC:5119]
ENSG00000252759	Y_RNA	-2.33788	0.000185389	0.00750747	2	200863152	200863247	Y RNA [Source:RFAM;Acc:RF00019]
ENSG00000273272	CTA-384D8.34	-2.33188	0.00136893	0.0288783	22	50542650	50543011
ENSG00000129538	RNASE1	-2.32024	0.00193022	0.0361594	14	20801228	20803278	ribonuclease A family member 1, pancreatic [Source:HGNC Symbol;Acc:HGNC:10044]
ENSG00000262406	MMP12	-2.31088	0.000131822	0.00611945	11	102862736	102875034	matrix metallopeptidase 12 [Source:HGNC Symbol;Acc:HGNC:7158]
ENSG00000185338	SOCS1	-2.31014	0.00104965	0.024453	16	11254405	11256179	suppressor of cytokine signaling 1 [Source:HGNC Symbol;Acc:HGNC:19383]
ENSG00000065320	NTN1	-2.30985	0.000380685	0.0122185	17	9021542	9244000	netrin 1 [Source:HGNC Symbol;Acc:HGNC:8029]
ENSG00000221643	SNORA77	-2.30163	0.000128932	0.00605841	1	203729581	203729705	small nucleolar RNA, H/ACA box 77 [Source:HGNC Symbol;Acc:HGNC:32663]
ENSG00000265972	TXNIP	-2.29103	3.7159e-07	0.000119669	1	145992435	145996600	thioredoxin interacting protein [Source:HGNC Symbol;Acc:HGNC:16952]
ENSG00000112149	CD83	-2.28914	0.000118084	0.0057043	6	14117256	14136918	CD83 molecule [Source:HGNC Symbol;Acc:HGNC:1703]
ENSG00000090339	ICAM1	-2.27712	0.000627557	0.0175136	19	10270835	10286615	intercellular adhesion molecule 1 [Source:HGNC Symbol;Acc:HGNC:5344]
ENSG00000049249	TNFRSF9	-2.27261	0.000772552	0.0199241	1	7915894	7943165	TNF receptor superfamily member 9 [Source:HGNC Symbol;Acc:HGNC:11924]
ENSG00000137462	TLR2	-2.27194	0.00115433	0.0258172	4	153701500	153705699	toll like receptor 2 [Source:HGNC Symbol;Acc:HGNC:11848]
ENSG00000117266	CDK18	-2.2703	4.0755e-07	0.000121202	1	205504595	205532793	cyclin dependent kinase 18 [Source:HGNC Symbol;Acc:HGNC:8751]
ENSG00000165507	C10orf10	-2.26924	0.000230508	0.0087534	10	44970981	44978810	chromosome 10 open reading frame 10 [Source:HGNC Symbol;Acc:HGNC:23355]
ENSG00000125347	IRF1	-2.26884	4.51685e-06	0.000643444	5	132481609	132490798	interferon regulatory factor 1 [Source:HGNC Symbol;Acc:HGNC:6116]
ENSG00000163221	S100A12	-2.26039	0.00307228	0.0483481	1	153373706	153375649	S100 calcium binding protein A12 [Source:HGNC Symbol;Acc:HGNC:10489]
ENSG00000276337	RP11-106D4.2	-2.25688	0.00269049	0.0449505	16	87470370	87474370
ENSG00000134107	BHLHE40	-2.25554	3.45354e-08	2.12036e-05	3	4979116	4985323	basic helix-loop-helix family member e40 [Source:HGNC Symbol;Acc:HGNC:1046]
ENSG00000198959	TGM2	-2.24586	0.000453896	0.0140016	20	38127387	38166578	transglutaminase 2 [Source:HGNC Symbol;Acc:HGNC:11778]
ENSG00000202314	SNORD6	-2.24081	0.000299608	0.0102747	11	93731502	93731574	small nucleolar RNA, C/D box 6 [Source:HGNC Symbol;Acc:HGNC:32703]
ENSG00000198435	NRARP	-2.23256	0.000175505	0.00732543	9	137300482	137302251	NOTCH-regulated ankyrin repeat protein [Source:HGNC Symbol;Acc:HGNC:33843]
ENSG00000130558	OLFM1	-2.23173	0.000566038	0.0164492	9	135075422	135121179	olfactomedin 1 [Source:HGNC Symbol;Acc:HGNC:17187]
ENSG00000233608	TWIST2	-2.20888	0.000463653	0.0142105	2	238848032	238910543	twist family bHLH transcription factor 2 [Source:HGNC Symbol;Acc:HGNC:20670]
ENSG00000172216	CEBPB	-2.20831	4.8982e-05	0.00339009	20	50190734	50192689	CCAAT/enhancer binding protein beta [Source:HGNC Symbol;Acc:HGNC:1834]
ENSG00000064989	CALCRL	-2.2083	0.0018196	0.0349282	2	187343129	187448460	calcitonin receptor like receptor [Source:HGNC Symbol;Acc:HGNC:16709]
ENSG00000168916	ZNF608	-2.2034	9.67886e-05	0.00504479	5	124636913	124748807	zinc finger protein 608 [Source:HGNC Symbol;Acc:HGNC:29238]
ENSG00000016082	ISL1	-2.1931	6.67826e-05	0.0039721	5	51383391	51394738	ISL LIM homeobox 1 [Source:HGNC Symbol;Acc:HGNC:6132]
ENSG00000197506	SLC28A3	-2.18539	0.000664542	0.0181967	9	84275457	84340683	solute carrier family 28 member 3 [Source:HGNC Symbol;Acc:HGNC:16484]
ENSG00000113369	ARRDC3	-2.18301	6.88792e-08	3.19751e-05	5	91368724	91383359	arrestin domain containing 3 [Source:HGNC Symbol;Acc:HGNC:29263]
ENSG00000130822	PNCK	-2.18023	0.00102217	0.0239299	X	153669730	153689010	pregnancy up-regulated nonubiquitous CaM kinase [Source:HGNC Symbol;Acc:HGNC:13415]
ENSG00000162572	SCNN1D	-2.18023	0.00142875	0.0297193	1	1280436	1292029	sodium channel epithelial 1 delta subunit [Source:HGNC Symbol;Acc:HGNC:10601]
ENSG00000169752	NRG4	-2.16409	3.18522e-07	0.000104525	15	75935969	76059795	neuregulin 4 [Source:HGNC Symbol;Acc:HGNC:29862]
ENSG00000170801	HTRA3	-2.15687	9.63604e-05	0.00504479	4	8269765	8307111	HtrA serine peptidase 3 [Source:HGNC Symbol;Acc:HGNC:30406]
ENSG00000183018	SPNS2	-2.13966	0.00303665	0.0481639	17	4498838	4539035	sphingolipid transporter 2 [Source:HGNC Symbol;Acc:HGNC:26992]
ENSG00000108821	COL1A1	-2.13554	0.0001048	0.00529316	17	50183289	50201632	collagen type I alpha 1 chain [Source:HGNC Symbol;Acc:HGNC:2197]
ENSG00000239948	RN7SL368P	-2.12756	0.00141964	0.0295623	19	43660500	43660776	RNA, 7SL, cytoplasmic 368, pseudogene [Source:HGNC Symbol;Acc:HGNC:46384]
ENSG00000182578	CSF1R	-2.12275	0.000557685	0.016355	5	150053291	150113372	colony stimulating factor 1 receptor [Source:HGNC Symbol;Acc:HGNC:2433]
ENSG00000186469	GNG2	-2.11898	6.72621e-06	0.000882897	14	51826195	51979342	G protein subunit gamma 2 [Source:HGNC Symbol;Acc:HGNC:4404]
ENSG00000188820	FAM26F	-2.11007	0.00072577	0.0192927	6	116461370	116463779	family with sequence similarity 26 member F [Source:HGNC Symbol;Acc:HGNC:33391]
ENSG00000132002	DNAJB1	-2.10698	4.85709e-05	0.00337391	19	14514770	14529770	DnaJ heat shock protein family (Hsp40) member B1 [Source:HGNC Symbol;Acc:HGNC:5270]
ENSG00000188293	IGFL1	-2.10573	0.00111722	0.0254354	19	46229752	46231243	IGF like family member 1 [Source:HGNC Symbol;Acc:HGNC:24093]
ENSG00000162552	WNT4	-2.10382	9.13134e-05	0.00484114	1	22117305	22143969	Wnt family member 4 [Source:HGNC Symbol;Acc:HGNC:12783]
ENSG00000130635	COL5A1	-2.10369	8.96738e-05	0.00479059	9	134641774	134844843	collagen type V alpha 1 chain [Source:HGNC Symbol;Acc:HGNC:2209]
ENSG00000183114	FAM43B	-2.1027	0.000612505	0.0173222	1	20552439	20555010	family with sequence similarity 43 member B [Source:HGNC Symbol;Acc:HGNC:31791]
ENSG00000177688	SUMO4	-2.10119	5.87832e-05	0.00366695	6	149400227	149401292	small ubiquitin-like modifier 4 [Source:HGNC Symbol;Acc:HGNC:21181]
ENSG00000272695	GAS6-AS2	-2.09947	2.45384e-05	0.00221042	13	113864168	113866833	GAS6 antisense RNA 2 (head to head) [Source:HGNC Symbol;Acc:HGNC:43694]
ENSG00000151846	PABPC3	-2.08237	8.99949e-05	0.00479059	13	25095868	25099254	poly(A) binding protein cytoplasmic 3 [Source:HGNC Symbol;Acc:HGNC:8556]
ENSG00000166147	FBN1	-2.06009	0.00285826	0.0463778	15	48408306	48645849	fibrillin 1 [Source:HGNC Symbol;Acc:HGNC:3603]
ENSG00000185650	ZFP36L1	-2.0584	3.62882e-08	2.15836e-05	14	68787660	68796253	ZFP36 ring finger protein like 1 [Source:HGNC Symbol;Acc:HGNC:1107]
ENSG00000113083	LOX	-2.05743	7.27172e-10	1.38403e-06	5	122063195	122078360	lysyl oxidase [Source:HGNC Symbol;Acc:HGNC:6664]
ENSG00000137331	IER3	-2.05546	4.38576e-06	0.000643444	6	30743199	30744554	immediate early response 3 [Source:HGNC Symbol;Acc:HGNC:5392]
ENSG00000114315	HES1	-2.04203	0.000272257	0.00968575	3	194136145	194138732	hes family bHLH transcription factor 1 [Source:HGNC Symbol;Acc:HGNC:5192]
ENSG00000148655	C10orf11	-2.04144	0.00234162	0.0411145	10	75431453	76560167	chromosome 10 open reading frame 11 [Source:HGNC Symbol;Acc:HGNC:23405]
ENSG00000133101	CCNA1	-2.04119	0.000935192	0.0226745	13	36431520	36442882	cyclin A1 [Source:HGNC Symbol;Acc:HGNC:1577]
ENSG00000113657	DPYSL3	-2.03169	2.84211e-05	0.00234586	5	147390811	147510056	dihydropyrimidinase like 3 [Source:HGNC Symbol;Acc:HGNC:3015]
ENSG00000272323	CTD-2517O10.6	-2.03053	0.00201336	0.0372326	5	34837549	34839278
ENSG00000106066	CPVL	-2.02122	4.75868e-06	0.000665971	7	28995231	29195451	carboxypeptidase, vitellogenic like [Source:HGNC Symbol;Acc:HGNC:14399]
ENSG00000272341	RP1-151F17.2	-2.02088	0.00301709	0.0479735	6	16764346	16766883
ENSG00000140450	ARRDC4	-2.01837	8.38795e-06	0.0009978	15	97960698	97973838	arrestin domain containing 4 [Source:HGNC Symbol;Acc:HGNC:28087]
ENSG00000227376	FTH1P16	-1.99427	0.00138787	0.0291239	11	77734475	77735026	ferritin heavy chain 1 pseudogene 16 [Source:HGNC Symbol;Acc:HGNC:3986]
ENSG00000132274	TRIM22	-1.99403	0.000512692	0.015367	11	5689689	5737089	tripartite motif containing 22 [Source:HGNC Symbol;Acc:HGNC:16379]
ENSG00000172985	SH3RF3	-1.97471	8.44138e-05	0.00463011	2	109129348	109504632	SH3 domain containing ring finger 3 [Source:HGNC Symbol;Acc:HGNC:24699]
ENSG00000059728	MXD1	-1.97014	2.24399e-05	0.00206328	2	69897688	69942945	MAX dimerization protein 1 [Source:HGNC Symbol;Acc:HGNC:6761]
ENSG00000125657	TNFSF9	-1.96898	0.00010324	0.00525393	19	6530999	6535928	tumor necrosis factor superfamily member 9 [Source:HGNC Symbol;Acc:HGNC:11939]
ENSG00000163131	CTSS	-1.96832	5.93218e-05	0.00367776	1	150730196	150765957	cathepsin S [Source:HGNC Symbol;Acc:HGNC:2545]
ENSG00000181458	TMEM45A	-1.96076	8.52888e-06	0.00100204	3	100492619	100577444	transmembrane protein 45A [Source:HGNC Symbol;Acc:HGNC:25480]
ENSG00000152952	PLOD2	-1.95625	0.000217852	0.00842758	3	146069440	146163653	procollagen-lysine,2-oxoglutarate 5-dioxygenase 2 [Source:HGNC Symbol;Acc:HGNC:9082]
ENSG00000217801	RP11-465B22.3	-1.95579	0.00226302	0.0403297	1	1059734	1069355
ENSG00000143333	RGS16	-1.95209	0.000222616	0.00854244	1	182598623	182604408	regulator of G-protein signaling 16 [Source:HGNC Symbol;Acc:HGNC:9997]
ENSG00000236047	AC073410.1	-1.94822	0.000295388	0.0101674	2	202520401	202520989
ENSG00000135111	TBX3	-1.9459	0.00093261	0.0226408	12	114670254	114684164	T-box 3 [Source:HGNC Symbol;Acc:HGNC:11602]
ENSG00000154734	ADAMTS1	-1.94574	0.000176262	0.00734092	21	26835747	26845409	ADAM metallopeptidase with thrombospondin type 1 motif 1 [Source:HGNC Symbol;Acc:HGNC:217]
ENSG00000205189	ZBTB10	-1.94381	0.000147082	0.00665559	8	80485619	80526265	zinc finger and BTB domain containing 10 [Source:HGNC Symbol;Acc:HGNC:30953]
ENSG00000125538	IL1B	-1.94014	0.000766979	0.0199142	2	112829751	112836903	interleukin 1 beta [Source:HGNC Symbol;Acc:HGNC:5992]
ENSG00000112379	ARFGEF3	-1.93526	0.001178	0.0261316	6	138161921	138344663	ARFGEF family member 3 [Source:HGNC Symbol;Acc:HGNC:21213]
ENSG00000136158	SPRY2	-1.93276	9.9048e-05	0.00513673	13	80335976	80340951	sprouty RTK signaling antagonist 2 [Source:HGNC Symbol;Acc:HGNC:11270]
ENSG00000137449	CPEB2	-1.93029	8.12694e-07	0.000203526	4	15002674	15070153	cytoplasmic polyadenylation element binding protein 2 [Source:HGNC Symbol;Acc:HGNC:21745]
ENSG00000123342	MMP19	-1.92874	0.00205229	0.0376524	12	55835433	55842966	matrix metallopeptidase 19 [Source:HGNC Symbol;Acc:HGNC:7165]
ENSG00000042062	FAM65C	-1.92861	0.0012587	0.0275689	20	50586108	50691528	family with sequence similarity 65 member C [Source:HGNC Symbol;Acc:HGNC:16168]
ENSG00000118922	KLF12	-1.92472	0.000165978	0.0071797	13	73686089	73995056	Kruppel like factor 12 [Source:HGNC Symbol;Acc:HGNC:6346]
ENSG00000153487	ING1	-1.92419	8.96892e-07	0.000220586	13	110712736	110723339	inhibitor of growth family member 1 [Source:HGNC Symbol;Acc:HGNC:6062]
ENSG00000179674	ARL14	-1.92217	0.00280942	0.0458363	3	160677159	160678452	ADP ribosylation factor like GTPase 14 [Source:HGNC Symbol;Acc:HGNC:22974]
ENSG00000141682	PMAIP1	-1.91548	7.19637e-05	0.00416317	18	59899948	59904306	phorbol-12-myristate-13-acetate-induced protein 1 [Source:HGNC Symbol;Acc:HGNC:9108]
ENSG00000105499	PLA2G4C	-1.90677	0.00247912	0.0427402	19	48047843	48110817	phospholipase A2 group IVC [Source:HGNC Symbol;Acc:HGNC:9037]
ENSG00000128016	ZFP36	-1.90554	0.00252924	0.0433295	19	39406813	39409412	ZFP36 ring finger protein [Source:HGNC Symbol;Acc:HGNC:12862]
ENSG00000107186	MPDZ	-1.89325	0.00116612	0.0259891	9	13105704	13279590	multiple PDZ domain crumbs cell polarity complex component [Source:HGNC Symbol;Acc:HGNC:7208]
ENSG00000272870	RP11-798M19.6	-1.88992	0.00324397	0.0497121	4	173363780	173370446
ENSG00000088448	ANKRD10	-1.88575	1.78735e-06	0.000369768	13	110878540	110915069	ankyrin repeat domain 10 [Source:HGNC Symbol;Acc:HGNC:20265]
ENSG00000167971	CASKIN1	-1.87839	0.00106839	0.0246578	16	2177180	2196525	CASK interacting protein 1 [Source:HGNC Symbol;Acc:HGNC:20879]
ENSG00000113916	BCL6	-1.86442	0.00306811	0.0483406	3	187721377	187745727	B-cell CLL/lymphoma 6 [Source:HGNC Symbol;Acc:HGNC:1001]
ENSG00000112715	VEGFA	-1.85688	6.3462e-09	7.52091e-06	6	43770184	43786487	vascular endothelial growth factor A [Source:HGNC Symbol;Acc:HGNC:12680]
ENSG00000166897	ELFN2	-1.84964	0.001681	0.0332212	22	37367960	37427470	extracellular leucine rich repeat and fibronectin type III domain containing 2 [Source:HGNC Symbol;Acc:HGNC:29396]
ENSG00000186480	INSIG1	-1.8468	3.30594e-06	0.000537794	7	155297776	155310235	insulin induced gene 1 [Source:HGNC Symbol;Acc:HGNC:6083]
ENSG00000123095	BHLHE41	-1.84662	0.000813502	0.0206445	12	26120026	26125127	basic helix-loop-helix family member e41 [Source:HGNC Symbol;Acc:HGNC:16617]
ENSG00000157657	ZNF618	-1.84139	0.000336578	0.0111024	9	113876282	114056591	zinc finger protein 618 [Source:HGNC Symbol;Acc:HGNC:29416]
ENSG00000264290	RP11-68I3.4	-1.83494	0.00182046	0.0349282	17	29569580	29570519
ENSG00000269925	RP3-467L1.6	-1.83224	0.00253462	0.0433804	1	7776383	7776775
ENSG00000227051	C14orf132	-1.82956	1.74488e-09	2.73101e-06	14	96039324	96093889	chromosome 14 open reading frame 132 [Source:HGNC Symbol;Acc:HGNC:20346]
ENSG00000095752	IL11	-1.82835	0.000149802	0.00671338	19	55364389	55370463	interleukin 11 [Source:HGNC Symbol;Acc:HGNC:5966]
ENSG00000087245	MMP2	-1.82435	0.000125494	0.00595641	16	55389700	55506691	matrix metallopeptidase 2 [Source:HGNC Symbol;Acc:HGNC:7166]
ENSG00000136052	SLC41A2	-1.82308	1.16585e-05	0.001264	12	104802553	104958744	solute carrier family 41 member 2 [Source:HGNC Symbol;Acc:HGNC:31045]
ENSG00000181690	PLAG1	-1.81994	0.000354522	0.0115147	8	56160904	56211324	PLAG1 zinc finger [Source:HGNC Symbol;Acc:HGNC:9045]
ENSG00000121743	GJA3	-1.81703	0.000177832	0.007354	13	20138255	20161049	gap junction protein alpha 3 [Source:HGNC Symbol;Acc:HGNC:4277]
ENSG00000182492	BGN	-1.81647	0.00200866	0.0372326	X	153494939	153509554	biglycan [Source:HGNC Symbol;Acc:HGNC:1044]
ENSG00000117016	RIMS3	-1.81298	0.00204453	0.0375613	1	40620679	40665657	regulating synaptic membrane exocytosis 3 [Source:HGNC Symbol;Acc:HGNC:21292]
ENSG00000168961	LGALS9	-1.81241	0.000463398	0.0142105	17	27629798	27649560	galectin 9 [Source:HGNC Symbol;Acc:HGNC:6570]
ENSG00000185697	MYBL1	-1.8097	6.38603e-08	3.03863e-05	8	66562175	66614247	MYB proto-oncogene like 1 [Source:HGNC Symbol;Acc:HGNC:7547]
ENSG00000144445	KANSL1L	-1.8078	1.16883e-05	0.001264	2	210021423	210171383	KAT8 regulatory NSL complex subunit 1 like [Source:HGNC Symbol;Acc:HGNC:26310]
ENSG00000146232	NFKBIE	-1.80497	0.000156581	0.00689863	6	44258166	44265788	NFKB inhibitor epsilon [Source:HGNC Symbol;Acc:HGNC:7799]
ENSG00000228446	AC073052.1	-1.79604	0.00227977	0.0404428	2	224499387	224500100
ENSG00000268601	AC115522.3	-1.79312	0.00115391	0.0258172	19	43794309	43795658
ENSG00000117616	RSRP1	-1.78514	7.22078e-06	0.000915516	1	25242237	25338213	arginine and serine rich protein 1 [Source:HGNC Symbol;Acc:HGNC:25234]
ENSG00000164949	GEM	-1.78365	2.34363e-06	0.000433071	8	94249253	94262350	GTP binding protein overexpressed in skeletal muscle [Source:HGNC Symbol;Acc:HGNC:4234]
ENSG00000214199	EEF1A1P12	-1.78275	0.000786884	0.0201689	2	106697331	106698676	eukaryotic translation elongation factor 1 alpha 1 pseudogene 12 [Source:HGNC Symbol;Acc:HGNC:3195]
ENSG00000091986	CCDC80	-1.78022	3.72452e-05	0.00277995	3	112596794	112649530	coiled-coil domain containing 80 [Source:HGNC Symbol;Acc:HGNC:30649]
ENSG00000092969	TGFB2	-1.77042	0.00132471	0.0283636	1	218346235	218444619	transforming growth factor beta 2 [Source:HGNC Symbol;Acc:HGNC:11768]
ENSG00000130052	STARD8	-1.7675	0.000225831	0.008631	X	68647666	68725842	StAR related lipid transfer domain containing 8 [Source:HGNC Symbol;Acc:HGNC:19161]
ENSG00000141068	KSR1	-1.76654	2.5702e-05	0.00221241	17	27456714	27626438	kinase suppressor of ras 1 [Source:HGNC Symbol;Acc:HGNC:6465]
ENSG00000129521	EGLN3	-1.76592	0.0013519	0.0286726	14	33924231	34462774	egl-9 family hypoxia inducible factor 3 [Source:HGNC Symbol;Acc:HGNC:14661]
ENSG00000131459	GFPT2	-1.7543	0.000442541	0.0137629	5	180300690	180353387	glutamine-fructose-6-phosphate transaminase 2 [Source:HGNC Symbol;Acc:HGNC:4242]
ENSG00000204618	RNF39	-1.75161	0.000326022	0.0108293	6	30070266	30075887	ring finger protein 39 [Source:HGNC Symbol;Acc:HGNC:18064]
ENSG00000144802	NFKBIZ	-1.74884	0.000324171	0.0108054	3	101827991	101861022	NFKB inhibitor zeta [Source:HGNC Symbol;Acc:HGNC:29805]
ENSG00000271369	RP11-350D17.3	-1.74633	0.00112049	0.0254795	11	34709600	34710161
ENSG00000145779	TNFAIP8	-1.74498	6.92266e-05	0.0040919	5	119268692	119399688	TNF alpha induced protein 8 [Source:HGNC Symbol;Acc:HGNC:17260]
ENSG00000052802	MSMO1	-1.74182	7.81815e-05	0.00436372	4	165327623	165343160	methylsterol monooxygenase 1 [Source:HGNC Symbol;Acc:HGNC:10545]
ENSG00000143507	DUSP10	-1.74062	2.15162e-08	1.51673e-05	1	221701424	221742176	dual specificity phosphatase 10 [Source:HGNC Symbol;Acc:HGNC:3065]
ENSG00000245532	NEAT1	-1.7399	0.00174306	0.0340128	11	65422774	65445540	nuclear paraspeckle assembly transcript 1 (non-protein coding) [Source:HGNC Symbol;Acc:HGNC:30815]
ENSG00000185652	NTF3	-1.73942	2.66372e-05	0.00225327	12	5432112	5521536	neurotrophin 3 [Source:HGNC Symbol;Acc:HGNC:8023]
ENSG00000138623	SEMA7A	-1.73794	0.000177374	0.007354	15	74409289	74434467	semaphorin 7A (John Milton Hagen blood group) [Source:HGNC Symbol;Acc:HGNC:10741]
ENSG00000015479	MATR3	-1.73601	0.00131914	0.0283057	5	139293648	139331677	matrin 3 [Source:HGNC Symbol;Acc:HGNC:6912]
ENSG00000198729	PPP1R14C	-1.72482	2.38701e-06	0.000436846	6	150143076	150250357	protein phosphatase 1 regulatory inhibitor subunit 14C [Source:HGNC Symbol;Acc:HGNC:14952]
ENSG00000132031	MATN3	-1.7242	1.48261e-05	0.00150901	2	19992111	20012694	matrilin 3 [Source:HGNC Symbol;Acc:HGNC:6909]
ENSG00000119917	IFIT3	-1.72021	3.1127e-05	0.0024685	10	89327894	89340971	interferon induced protein with tetratricopeptide repeats 3 [Source:HGNC Symbol;Acc:HGNC:5411]
ENSG00000175130	MARCKSL1	-1.71496	0.00228212	0.0404428	1	32333832	32336379	MARCKS like 1 [Source:HGNC Symbol;Acc:HGNC:7142]
ENSG00000167074	TEF	-1.7115	9.52023e-09	8.62851e-06	22	41367333	41399326	TEF, PAR bZIP transcription factor [Source:HGNC Symbol;Acc:HGNC:11722]
ENSG00000144136	SLC20A1	-1.7062	6.25175e-08	3.03863e-05	2	112645857	112663827	solute carrier family 20 member 1 [Source:HGNC Symbol;Acc:HGNC:10946]
ENSG00000143320	CRABP2	-1.70195	0.000106114	0.00531286	1	156699606	156705816	cellular retinoic acid binding protein 2 [Source:HGNC Symbol;Acc:HGNC:2339]
ENSG00000057657	PRDM1	-1.69663	0.000445744	0.0138173	6	106086320	106109939	PR/SET domain 1 [Source:HGNC Symbol;Acc:HGNC:9346]
ENSG00000160471	COX6B2	-1.69605	0.000239242	0.00896357	19	55349306	55354814	cytochrome c oxidase subunit 6B2 [Source:HGNC Symbol;Acc:HGNC:24380]
ENSG00000197536	C5orf56	-1.69375	0.000352135	0.011496	5	132410636	132488702	chromosome 5 open reading frame 56 [Source:HGNC Symbol;Acc:HGNC:33838]
ENSG00000138166	DUSP5	-1.68229	2.19391e-06	0.000417566	10	110497838	110511544	dual specificity phosphatase 5 [Source:HGNC Symbol;Acc:HGNC:3071]
ENSG00000108179	PPIF	-1.67897	4.07376e-05	0.00297073	10	79347469	79355337	peptidylprolyl isomerase F [Source:HGNC Symbol;Acc:HGNC:9259]
ENSG00000120129	DUSP1	-1.66999	0.0008356	0.021037	5	172768090	172771195	dual specificity phosphatase 1 [Source:HGNC Symbol;Acc:HGNC:3064]
ENSG00000165716	FAM69B	-1.66908	0.000977855	0.0232013	9	136712570	136724050	family with sequence similarity 69 member B [Source:HGNC Symbol;Acc:HGNC:28290]
ENSG00000111674	ENO2	-1.66534	1.9497e-08	1.42726e-05	12	6913745	6923698	enolase 2 [Source:HGNC Symbol;Acc:HGNC:3353]
ENSG00000165572	KBTBD6	-1.66351	1.00291e-08	8.67653e-06	13	41127569	41132746	kelch repeat and BTB domain containing 6 [Source:HGNC Symbol;Acc:HGNC:25340]
ENSG00000183722	LHFP	-1.65744	1.31506e-05	0.00138285	13	39342892	39603528	lipoma HMGIC fusion partner [Source:HGNC Symbol;Acc:HGNC:6586]
ENSG00000179862	CITED4	-1.65396	0.000130873	0.00610079	1	40861051	40862366	Cbp/p300 interacting transactivator with Glu/Asp rich carboxy-terminal domain 4 [Source:HGNC Symbol;Acc:HGNC:18696]
ENSG00000169908	TM4SF1	-1.65156	9.57043e-06	0.00110269	3	149369022	149377865	transmembrane 4 L six family member 1 [Source:HGNC Symbol;Acc:HGNC:11853]
ENSG00000115008	IL1A	-1.64656	3.77247e-07	0.000119669	2	112773915	112784590	interleukin 1 alpha [Source:HGNC Symbol;Acc:HGNC:5991]
ENSG00000120694	HSPH1	-1.64064	4.8461e-11	1.31765e-07	13	31134974	31162388	heat shock protein family H (Hsp110) member 1 [Source:HGNC Symbol;Acc:HGNC:16969]
ENSG00000159674	SPON2	-1.63857	0.00309254	0.0484798	4	1166932	1208962	spondin 2 [Source:HGNC Symbol;Acc:HGNC:11253]
ENSG00000160207	HSF2BP	-1.63337	0.000161061	0.00703219	21	43529192	43659493	heat shock transcription factor 2 binding protein [Source:HGNC Symbol;Acc:HGNC:5226]
ENSG00000134070	IRAK2	-1.63291	0.000218757	0.00844005	3	10164865	10243743	interleukin 1 receptor associated kinase 2 [Source:HGNC Symbol;Acc:HGNC:6113]
ENSG00000230551	CTB-89H12.4	-1.63173	0.000280853	0.00984435	5	149494314	149504670
ENSG00000118503	TNFAIP3	-1.62179	2.87069e-05	0.00234586	6	137867188	137883312	TNF alpha induced protein 3 [Source:HGNC Symbol;Acc:HGNC:11896]
ENSG00000143217	NECTIN4	-1.60944	0.000785037	0.0201689	1	161070995	161089599	nectin cell adhesion molecule 4 [Source:HGNC Symbol;Acc:HGNC:19688]
ENSG00000112972	HMGCS1	-1.60783	5.21913e-08	2.68475e-05	5	43289395	43313512	3-hydroxy-3-methylglutaryl-CoA synthase 1 [Source:HGNC Symbol;Acc:HGNC:5007]
ENSG00000163545	NUAK2	-1.59987	1.35441e-05	0.00140101	1	205302059	205321791	NUAK family kinase 2 [Source:HGNC Symbol;Acc:HGNC:29558]
ENSG00000137440	FGFBP1	-1.59904	2.16697e-06	0.000417566	4	15935569	15938740	fibroblast growth factor binding protein 1 [Source:HGNC Symbol;Acc:HGNC:19695]
ENSG00000159208	CIART	-1.59707	0.00274012	0.0453897	1	150282543	150287093	circadian associated repressor of transcription [Source:HGNC Symbol;Acc:HGNC:25200]
ENSG00000224078	SNHG14	-1.59627	0.00322486	0.049539	15	24978583	25419462	small nucleolar RNA host gene 14 [Source:HGNC Symbol;Acc:HGNC:37462]
ENSG00000178573	MAF	-1.59442	1.15117e-05	0.00125921	16	79585843	79600714	MAF bZIP transcription factor [Source:HGNC Symbol;Acc:HGNC:6776]
ENSG00000204427	ABHD16A	-1.59313	0.00315438	0.0488358	6	31686949	31703444	abhydrolase domain containing 16A [Source:HGNC Symbol;Acc:HGNC:13921]
ENSG00000048052	HDAC9	-1.59244	0.000252981	0.00931573	7	18086949	19002416	histone deacetylase 9 [Source:HGNC Symbol;Acc:HGNC:14065]
ENSG00000281162	LINC01127	-1.58807	0.000938924	0.0227075	2	101962056	101987167	long intergenic non-protein coding RNA 1127 [Source:HGNC Symbol;Acc:HGNC:49292]
ENSG00000101493	ZNF516	-1.58714	4.05283e-07	0.000121202	18	76358190	76495190	zinc finger protein 516 [Source:HGNC Symbol;Acc:HGNC:28990]
ENSG00000271133	CTA-293F17.1	-1.58613	0.00170813	0.0335291	7	20328299	20331747
ENSG00000149131	SERPING1	-1.58278	0.00252648	0.0433295	11	57597387	57614853	serpin family G member 1 [Source:HGNC Symbol;Acc:HGNC:1228]
ENSG00000178695	KCTD12	-1.57749	0.000183325	0.00747156	13	76880166	76886390	potassium channel tetramerization domain containing 12 [Source:HGNC Symbol;Acc:HGNC:14678]
ENSG00000166016	ABTB2	-1.57713	0.000102696	0.00525393	11	34150988	34358008	ankyrin repeat and BTB domain containing 2 [Source:HGNC Symbol;Acc:HGNC:23842]
ENSG00000069399	BCL3	-1.57311	0.000264619	0.00953882	19	44747705	44760044	B-cell CLL/lymphoma 3 [Source:HGNC Symbol;Acc:HGNC:998]
ENSG00000213073	RP11-288H12.3	-1.57106	0.000166969	0.00718985	6	160093082	160096212
ENSG00000174827	PDZK1	-1.57054	0.000114756	0.00562927	1	145670852	145708148	PDZ domain containing 1 [Source:HGNC Symbol;Acc:HGNC:8821]
ENSG00000164236	ANKRD33B	-1.5703	1.53716e-05	0.00154798	5	10564330	10657816	ankyrin repeat domain 33B [Source:HGNC Symbol;Acc:HGNC:35240]
ENSG00000111432	FZD10	-1.57017	4.5301e-06	0.000643444	12	130162459	130165740	frizzled class receptor 10 [Source:HGNC Symbol;Acc:HGNC:4039]
ENSG00000186767	SPIN4	-1.57006	1.394e-07	5.89599e-05	X	63347228	63351344	spindlin family member 4 [Source:HGNC Symbol;Acc:HGNC:27040]
ENSG00000139679	LPAR6	-1.56946	0.000178843	0.00736777	13	48389567	48444704	lysophosphatidic acid receptor 6 [Source:HGNC Symbol;Acc:HGNC:15520]
ENSG00000003137	CYP26B1	-1.56906	0.000311509	0.0105497	2	72129238	72148038	cytochrome P450 family 26 subfamily B member 1 [Source:HGNC Symbol;Acc:HGNC:20581]
ENSG00000105792	CFAP69	-1.56181	0.00172047	0.0336889	7	90245174	90311063	cilia and flagella associated protein 69 [Source:HGNC Symbol;Acc:HGNC:26107]
ENSG00000183287	CCBE1	-1.56095	0.000286019	0.00997032	18	59430940	59697380	collagen and calcium binding EGF domains 1 [Source:HGNC Symbol;Acc:HGNC:29426]
ENSG00000210082	MT-RNR2	-1.55968	0.000479472	0.0146013	MT	1671	3229	mitochondrially encoded 16S RNA [Source:HGNC Symbol;Acc:HGNC:7471]
ENSG00000198355	PIM3	-1.55621	0.00016109	0.00703219	22	49960513	49964080	Pim-3 proto-oncogene, serine/threonine kinase [Source:HGNC Symbol;Acc:HGNC:19310]
ENSG00000126368	NR1D1	-1.55321	1.74141e-05	0.00170847	17	40092787	40100725	nuclear receptor subfamily 1 group D member 1 [Source:HGNC Symbol;Acc:HGNC:7962]
ENSG00000137094	DNAJB5	-1.55262	0.00069374	0.0187819	9	34989641	34998900	DnaJ heat shock protein family (Hsp40) member B5 [Source:HGNC Symbol;Acc:HGNC:14887]
ENSG00000255398	HCAR3	-1.54967	0.00135819	0.0287228	12	122714756	122716892	hydroxycarboxylic acid receptor 3 [Source:HGNC Symbol;Acc:HGNC:16824]
ENSG00000279141	LINC01451	-1.54795	0.00272123	0.0451948	9	136612024	136617181	long intergenic non-protein coding RNA 1451 [Source:HGNC Symbol;Acc:HGNC:48599]
ENSG00000205221	VIT	-1.54576	0.000967575	0.0230198	2	36696690	36814792	vitrin [Source:HGNC Symbol;Acc:HGNC:12697]
ENSG00000023445	BIRC3	-1.54366	8.23532e-08	3.73197e-05	11	102317450	102339403	baculoviral IAP repeat containing 3 [Source:HGNC Symbol;Acc:HGNC:591]
ENSG00000171604	CXXC5	-1.5428	0.00235004	0.0412016	5	139647299	139683882	CXXC finger protein 5 [Source:HGNC Symbol;Acc:HGNC:26943]
ENSG00000134884	ARGLU1	-1.53756	4.04903e-05	0.00296404	13	106541673	106568164	arginine and glutamate rich 1 [Source:HGNC Symbol;Acc:HGNC:25482]
ENSG00000114541	FRMD4B	-1.53046	2.86079e-05	0.00234586	3	69169990	69542583	FERM domain containing 4B [Source:HGNC Symbol;Acc:HGNC:24886]
ENSG00000169184	MN1	-1.51998	0.000174389	0.00731087	22	27748277	27801498	MN1 proto-oncogene, transcriptional regulator [Source:HGNC Symbol;Acc:HGNC:7180]
ENSG00000184557	SOCS3	-1.51628	0.000767605	0.0199142	17	78356778	78360077	suppressor of cytokine signaling 3 [Source:HGNC Symbol;Acc:HGNC:19391]
ENSG00000100097	LGALS1	-1.51521	2.11105e-06	0.000414222	22	37675608	37679806	galectin 1 [Source:HGNC Symbol;Acc:HGNC:6561]
ENSG00000204516	MICB	-1.514	0.000683403	0.0185552	6	31494881	31511124	MHC class I polypeptide-related sequence B [Source:HGNC Symbol;Acc:HGNC:7091]
ENSG00000134013	LOXL2	-1.51181	0.000324176	0.0108054	8	23297189	23425328	lysyl oxidase like 2 [Source:HGNC Symbol;Acc:HGNC:6666]
ENSG00000279133	RP11-342K2.1	-1.51061	0.000977758	0.0232013	17	62003700	62007518
ENSG00000072682	P4HA2	-1.50877	5.39101e-09	6.84048e-06	5	132191838	132295315	prolyl 4-hydroxylase subunit alpha 2 [Source:HGNC Symbol;Acc:HGNC:8547]
ENSG00000144476	ACKR3	-1.50633	2.84744e-05	0.00234586	2	236567787	236582358	atypical chemokine receptor 3 [Source:HGNC Symbol;Acc:HGNC:23692]
ENSG00000184163	C1QTNF12	-1.50432	0.0024766	0.0427354	1	1242446	1246722	C1q and tumor necrosis factor related protein 12 [Source:HGNC Symbol;Acc:HGNC:32308]
ENSG00000232774	FLJ22447	-1.50382	0.00157501	0.0318977	14	61570540	61658696	uncharacterized LOC400221 [Source:EntrezGene;Acc:400221]
ENSG00000143878	RHOB	-1.49875	0.000791313	0.0202162	2	20447074	20449445	ras homolog family member B [Source:HGNC Symbol;Acc:HGNC:668]
ENSG00000188215	DCUN1D3	-1.49677	2.7699e-06	0.00047495	16	20854925	20900384	defective in cullin neddylation 1 domain containing 3 [Source:HGNC Symbol;Acc:HGNC:28734]
ENSG00000270069	MIR222HG	-1.49156	0.000477228	0.0145562	X	45745211	45770274	MIR222 host gene [Source:HGNC Symbol;Acc:HGNC:49555]
ENSG00000133106	EPSTI1	-1.48139	0.0002005	0.00790789	13	42886388	42992271	epithelial stromal interaction 1 [Source:HGNC Symbol;Acc:HGNC:16465]
ENSG00000151612	ZNF827	-1.47643	0.000270488	0.00964083	4	145757627	145938635	zinc finger protein 827 [Source:HGNC Symbol;Acc:HGNC:27193]
ENSG00000214135	AC024560.3	-1.47349	0.00025701	0.00936379	3	197578213	197627906
ENSG00000176597	B3GNT5	-1.47294	3.39858e-05	0.00262948	3	183253244	183298504	UDP-GlcNAc:betaGal beta-1,3-N-acetylglucosaminyltransferase 5 [Source:HGNC Symbol;Acc:HGNC:15684]
ENSG00000144369	FAM171B	-1.46604	6.18926e-05	0.00377828	2	186693971	186765965	family with sequence similarity 171 member B [Source:HGNC Symbol;Acc:HGNC:29412]
ENSG00000180667	YOD1	-1.46578	5.85708e-05	0.00366695	1	207043849	207052980	YOD1 deubiquitinase [Source:HGNC Symbol;Acc:HGNC:25035]
ENSG00000116717	GADD45A	-1.45316	6.67722e-05	0.0039721	1	67685061	67688338	growth arrest and DNA damage inducible alpha [Source:HGNC Symbol;Acc:HGNC:4095]
ENSG00000013441	CLK1	-1.45189	8.86069e-05	0.00479059	2	200853009	200864744	CDC like kinase 1 [Source:HGNC Symbol;Acc:HGNC:2068]
ENSG00000111860	CEP85L	-1.45094	0.00113466	0.0256789	6	118460772	118710075	centrosomal protein 85 like [Source:HGNC Symbol;Acc:HGNC:21638]
ENSG00000269906	RP11-248J18.2	-1.44415	0.000169936	0.00720529	14	50662511	50663178
ENSG00000166265	CYYR1	-1.43533	1.07227e-05	0.0012005	21	26466209	26573284	cysteine and tyrosine rich 1 [Source:HGNC Symbol;Acc:HGNC:16274]
ENSG00000273356	LINC02019	-1.43352	0.000706948	0.0189512	3	50669989	50672048	long intergenic non-protein coding RNA 2019 [Source:HGNC Symbol;Acc:HGNC:52854]
ENSG00000178381	ZFAND2A	-1.43305	0.000662096	0.0181967	7	1152071	1160759	zinc finger AN1-type containing 2A [Source:HGNC Symbol;Acc:HGNC:28073]
ENSG00000119669	IRF2BPL	-1.43111	2.69516e-06	0.000470615	14	77024543	77028699	interferon regulatory factor 2 binding protein like [Source:HGNC Symbol;Acc:HGNC:14282]
ENSG00000163520	FBLN2	-1.42855	0.00253677	0.0433804	3	13549131	13638422	fibulin 2 [Source:HGNC Symbol;Acc:HGNC:3601]
ENSG00000125772	GPCPD1	-1.42842	2.96345e-06	0.00049398	20	5544404	5611026	glycerophosphocholine phosphodiesterase 1 [Source:HGNC Symbol;Acc:HGNC:26957]
ENSG00000196611	MMP1	-1.42534	7.13494e-05	0.00415288	11	102789920	102798160	matrix metallopeptidase 1 [Source:HGNC Symbol;Acc:HGNC:7155]
ENSG00000165272	AQP3	-1.41976	0.00066603	0.0181967	9	33441154	33447611	aquaporin 3 (Gill blood group) [Source:HGNC Symbol;Acc:HGNC:636]
ENSG00000137193	PIM1	-1.41943	1.10037e-05	0.0012106	6	37170203	37175426	Pim-1 proto-oncogene, serine/threonine kinase [Source:HGNC Symbol;Acc:HGNC:8986]
ENSG00000165997	ARL5B	-1.40647	9.09305e-06	0.00105529	10	18659405	18681639	ADP ribosylation factor like GTPase 5B [Source:HGNC Symbol;Acc:HGNC:23052]
ENSG00000114023	FAM162A	-1.40249	9.58708e-05	0.00504479	3	122384176	122412334	family with sequence similarity 162 member A [Source:HGNC Symbol;Acc:HGNC:17865]
ENSG00000127415	IDUA	-1.40165	0.00177198	0.0343793	4	986997	1004506	iduronidase, alpha-L- [Source:HGNC Symbol;Acc:HGNC:5391]
ENSG00000143630	HCN3	-1.39945	0.00110262	0.0252237	1	155277583	155289848	hyperpolarization activated cyclic nucleotide gated potassium channel 3 [Source:HGNC Symbol;Acc:HGNC:19183]
ENSG00000151014	NOCT	-1.39884	0.000375896	0.0121262	4	139015789	139045939	nocturnin [Source:HGNC Symbol;Acc:HGNC:14254]
ENSG00000104312	RIPK2	-1.39637	0.0006316	0.0175749	8	89757747	89791063	receptor interacting serine/threonine kinase 2 [Source:HGNC Symbol;Acc:HGNC:10020]
ENSG00000141448	GATA6	-1.39199	0.0025127	0.0432016	18	22169443	22202528	GATA binding protein 6 [Source:HGNC Symbol;Acc:HGNC:4174]
ENSG00000163660	CCNL1	-1.39056	4.48634e-06	0.000643444	3	157146508	157160760	cyclin L1 [Source:HGNC Symbol;Acc:HGNC:20569]
ENSG00000065809	FAM107B	-1.38944	3.29717e-05	0.00258252	10	14518557	14774897	family with sequence similarity 107 member B [Source:HGNC Symbol;Acc:HGNC:23726]
ENSG00000034239	EFCAB1	-1.38943	0.00270578	0.0450926	8	48710789	48735311	EF-hand calcium binding domain 1 [Source:HGNC Symbol;Acc:HGNC:25678]
ENSG00000227300	KRT16P2	-1.38871	0.00135281	0.0286726	17	16829999	16832830	keratin 16 pseudogene 2 [Source:HGNC Symbol;Acc:HGNC:37807]
ENSG00000277443	MARCKS	-1.38651	0.00150867	0.0308758	6	113857362	113863471	myristoylated alanine rich protein kinase C substrate [Source:HGNC Symbol;Acc:HGNC:6759]
ENSG00000232702	RP3-437C15.1	-1.38526	0.00169319	0.0333494	6	51410081	51410537
ENSG00000104722	NEFM	-1.37996	0.000446938	0.0138318	8	24913012	24919098	neurofilament medium [Source:HGNC Symbol;Acc:HGNC:7734]
ENSG00000120738	EGR1	-1.37654	4.97026e-05	0.00339901	5	138465490	138469315	early growth response 1 [Source:HGNC Symbol;Acc:HGNC:3238]
ENSG00000120833	SOCS2	-1.37532	2.12774e-05	0.00200482	12	93569814	93583487	suppressor of cytokine signaling 2 [Source:HGNC Symbol;Acc:HGNC:19382]
ENSG00000154640	BTG3	-1.37406	0.000306659	0.0104599	21	17593653	17612947	BTG anti-proliferation factor 3 [Source:HGNC Symbol;Acc:HGNC:1132]
ENSG00000183087	GAS6	-1.37363	1.33504e-05	0.00139615	13	113820549	113864067	growth arrest specific 6 [Source:HGNC Symbol;Acc:HGNC:4168]
ENSG00000184922	FMNL1	-1.36755	2.82565e-05	0.00234586	17	45221444	45247320	formin like 1 [Source:HGNC Symbol;Acc:HGNC:1212]
ENSG00000121297	TSHZ3	-1.36705	4.92061e-05	0.00339326	19	31274945	31349547	teashirt zinc finger homeobox 3 [Source:HGNC Symbol;Acc:HGNC:30700]
ENSG00000197461	PDGFA	-1.36625	6.88363e-09	7.52091e-06	7	497258	520296	platelet derived growth factor subunit A [Source:HGNC Symbol;Acc:HGNC:8799]
ENSG00000100625	SIX4	-1.36368	0.00050985	0.0153086	14	60709528	60724348	SIX homeobox 4 [Source:HGNC Symbol;Acc:HGNC:10890]
ENSG00000114270	COL7A1	-1.35987	1.80982e-05	0.00173971	3	48564073	48595267	collagen type VII alpha 1 chain [Source:HGNC Symbol;Acc:HGNC:2214]
ENSG00000122877	EGR2	-1.35537	0.000152561	0.00681617	10	62811996	62919900	early growth response 2 [Source:HGNC Symbol;Acc:HGNC:3239]
ENSG00000170873	MTSS1	-1.35237	2.51402e-05	0.00221236	8	124550790	124728429	MTSS1, I-BAR domain containing [Source:HGNC Symbol;Acc:HGNC:20443]
ENSG00000213397	HAUS7	-1.34736	0.000430472	0.0134978	X	153447666	153495516	HAUS augmin like complex subunit 7 [Source:HGNC Symbol;Acc:HGNC:32979]
ENSG00000114268	PFKFB4	-1.34601	4.91711e-06	0.000678169	3	48517684	48562015	6-phosphofructo-2-kinase/fructose-2,6-biphosphatase 4 [Source:HGNC Symbol;Acc:HGNC:8875]
ENSG00000132932	ATP8A2	-1.34288	3.8937e-06	0.00060745	13	25372071	26025851	ATPase phospholipid transporting 8A2 [Source:HGNC Symbol;Acc:HGNC:13533]
ENSG00000175906	ARL4D	-1.34134	2.48916e-05	0.00221236	17	43398959	43401137	ADP ribosylation factor like GTPase 4D [Source:HGNC Symbol;Acc:HGNC:656]
ENSG00000198743	SLC5A3	-1.34107	0.000765866	0.0199142	21	34073570	34106262	solute carrier family 5 member 3 [Source:HGNC Symbol;Acc:HGNC:11038]
ENSG00000128713	HOXD11	-1.33984	5.43077e-05	0.00351578	2	176104216	176109754	homeobox D11 [Source:HGNC Symbol;Acc:HGNC:5134]
ENSG00000104549	SQLE	-1.3396	5.11131e-07	0.000145199	8	124998497	125022283	squalene epoxidase [Source:HGNC Symbol;Acc:HGNC:11279]
ENSG00000171617	ENC1	-1.33592	0.001572	0.0318974	5	74627406	74641424	ectodermal-neural cortex 1 [Source:HGNC Symbol;Acc:HGNC:3345]
ENSG00000139517	LNX2	-1.33302	2.18681e-06	0.000417566	13	27545911	27620404	ligand of numb-protein X 2 [Source:HGNC Symbol;Acc:HGNC:20421]
ENSG00000150907	FOXO1	-1.33082	5.7693e-06	0.00077329	13	40469953	40666597	forkhead box O1 [Source:HGNC Symbol;Acc:HGNC:3819]
ENSG00000105855	ITGB8	-1.32718	8.4646e-06	0.00100066	7	20330702	20415754	integrin subunit beta 8 [Source:HGNC Symbol;Acc:HGNC:6163]
ENSG00000152484	USP12	-1.31238	1.83436e-06	0.000371419	13	27066142	27171896	ubiquitin specific peptidase 12 [Source:HGNC Symbol;Acc:HGNC:20485]
ENSG00000122861	PLAU	-1.30242	0.00114739	0.0258172	10	73909177	73917497	plasminogen activator, urokinase [Source:HGNC Symbol;Acc:HGNC:9052]
ENSG00000169228	RAB24	-1.30165	0.00131148	0.0283009	5	177301198	177303744	RAB24, member RAS oncogene family [Source:HGNC Symbol;Acc:HGNC:9765]
ENSG00000175600	SUGCT	-1.29975	0.000124685	0.00593281	7	40134977	40860763	succinyl-CoA:glutarate-CoA transferase [Source:HGNC Symbol;Acc:HGNC:16001]
ENSG00000143816	WNT9A	-1.29567	0.000683363	0.0185552	1	227918656	227947898	Wnt family member 9A [Source:HGNC Symbol;Acc:HGNC:12778]
ENSG00000147231	CXorf57	-1.29256	0.00188094	0.0356218	X	106611930	106679442	chromosome X open reading frame 57 [Source:HGNC Symbol;Acc:HGNC:25486]
ENSG00000130066	SAT1	-1.29131	7.3271e-05	0.0041685	X	23783173	23786226	spermidine/spermine N1-acetyltransferase 1 [Source:HGNC Symbol;Acc:HGNC:10540]
ENSG00000213085	CFAP45	-1.28473	0.000486904	0.0147333	1	159872364	159900163	cilia and flagella associated protein 45 [Source:HGNC Symbol;Acc:HGNC:17229]
ENSG00000136153	LMO7	-1.28454	0.000618434	0.0174122	13	75620434	75859870	LIM domain 7 [Source:HGNC Symbol;Acc:HGNC:6646]
ENSG00000177606	JUN	-1.28299	0.00157684	0.0318977	1	58780788	58784327	Jun proto-oncogene, AP-1 transcription factor subunit [Source:HGNC Symbol;Acc:HGNC:6204]
ENSG00000113594	LIFR	-1.2772	0.00136542	0.0288436	5	38474963	38608354	leukemia inhibitory factor receptor alpha [Source:HGNC Symbol;Acc:HGNC:6597]
ENSG00000240024	LINC00888	-1.27493	0.000376669	0.0121269	3	183447608	183456013	long intergenic non-protein coding RNA 888 [Source:HGNC Symbol;Acc:HGNC:48575]
ENSG00000231721	LINC-PINT	-1.26996	0.000589607	0.0169006	7	130941760	131110176	long intergenic non-protein coding RNA, p53 induced transcript [Source:HGNC Symbol;Acc:HGNC:26885]
ENSG00000182782	HCAR2	-1.26971	0.00266413	0.0446752	12	122701293	122703343	hydroxycarboxylic acid receptor 2 [Source:HGNC Symbol;Acc:HGNC:24827]
ENSG00000188342	GTF2F2	-1.26966	0.00271034	0.0450926	13	45120515	45284909	general transcription factor IIF subunit 2 [Source:HGNC Symbol;Acc:HGNC:4653]
ENSG00000182742	HOXB4	-1.25262	0.000867167	0.0214828	17	48575513	48580111	homeobox B4 [Source:HGNC Symbol;Acc:HGNC:5115]
ENSG00000152795	HNRNPDL	-1.25155	0.000107847	0.00537343	4	82422564	82430408	heterogeneous nuclear ribonucleoprotein D like [Source:HGNC Symbol;Acc:HGNC:5037]
ENSG00000124145	SDC4	-1.25111	0.00141606	0.0295201	20	45325288	45348424	syndecan 4 [Source:HGNC Symbol;Acc:HGNC:10661]
ENSG00000146242	TPBG	-1.25092	0.000206532	0.0080883	6	82363206	82370828	trophoblast glycoprotein [Source:HGNC Symbol;Acc:HGNC:12004]
ENSG00000135925	WNT10A	-1.24584	0.000947697	0.0227459	2	218880363	218899581	Wnt family member 10A [Source:HGNC Symbol;Acc:HGNC:13829]
ENSG00000143067	ZNF697	-1.24231	0.000162611	0.00708231	1	119619422	119647773	zinc finger protein 697 [Source:HGNC Symbol;Acc:HGNC:32034]
ENSG00000160712	IL6R	-1.23728	5.76491e-05	0.0036453	1	154405193	154469450	interleukin 6 receptor [Source:HGNC Symbol;Acc:HGNC:6019]
ENSG00000206417	H1FX-AS1	-1.23699	0.00188552	0.0356731	3	129315392	129326225	H1FX antisense RNA 1 [Source:HGNC Symbol;Acc:HGNC:27953]
ENSG00000168264	IRF2BP2	-1.23386	2.58583e-07	9.28606e-05	1	234604269	234609525	interferon regulatory factor 2 binding protein 2 [Source:HGNC Symbol;Acc:HGNC:21729]
ENSG00000118689	FOXO3	-1.23371	0.00101199	0.0237499	6	108559835	108684774	forkhead box O3 [Source:HGNC Symbol;Acc:HGNC:3821]
ENSG00000106588	PSMA2	-1.2291	0.00161671	0.0323777	7	42916857	42932223	proteasome subunit alpha 2 [Source:HGNC Symbol;Acc:HGNC:9531]
ENSG00000145901	TNIP1	-1.22399	0.000239762	0.0089654	5	151029945	151093577	TNFAIP3 interacting protein 1 [Source:HGNC Symbol;Acc:HGNC:16903]
ENSG00000213930	GALT	-1.22246	0.00311821	0.0486866	9	34638133	34651035	galactose-1-phosphate uridylyltransferase [Source:HGNC Symbol;Acc:HGNC:4135]
ENSG00000074695	LMAN1	-1.21802	2.03948e-05	0.00193122	18	59327823	59359962	lectin, mannose binding 1 [Source:HGNC Symbol;Acc:HGNC:6631]
ENSG00000150477	KIAA1328	-1.2167	2.25489e-05	0.00206333	18	36829106	37232172	KIAA1328 [Source:HGNC Symbol;Acc:HGNC:29248]
ENSG00000147883	CDKN2B	-1.21611	0.00276456	0.0454663	9	22002903	22009363	cyclin dependent kinase inhibitor 2B [Source:HGNC Symbol;Acc:HGNC:1788]
ENSG00000139793	MBNL2	-1.21071	2.52953e-06	0.000445782	13	97221434	97394120	muscleblind like splicing regulator 2 [Source:HGNC Symbol;Acc:HGNC:16746]
ENSG00000123191	ATP7B	-1.2094	0.00287867	0.046432	13	51930436	52012125	ATPase copper transporting beta [Source:HGNC Symbol;Acc:HGNC:870]
ENSG00000197744	PTMAP2	-1.20928	0.00132549	0.0283636	5	118973796	118974122	prothymosin, alpha pseudogene 2 [Source:HGNC Symbol;Acc:HGNC:9625]
ENSG00000162616	DNAJB4	-1.2075	0.00263707	0.044513	1	77979175	78017964	DnaJ heat shock protein family (Hsp40) member B4 [Source:HGNC Symbol;Acc:HGNC:14886]
ENSG00000162783	IER5	-1.20712	0.00244731	0.0423187	1	181088712	181092899	immediate early response 5 [Source:HGNC Symbol;Acc:HGNC:5393]
ENSG00000167779	IGFBP6	-1.2045	0.00199059	0.0370471	12	53097436	53102345	insulin like growth factor binding protein 6 [Source:HGNC Symbol;Acc:HGNC:5475]
ENSG00000169242	EFNA1	-1.20433	0.00281043	0.0458363	1	155127460	155134857	ephrin A1 [Source:HGNC Symbol;Acc:HGNC:3221]
ENSG00000265681	RPL17	-1.19927	0.00109841	0.0251577	18	49488453	49492523	ribosomal protein L17 [Source:HGNC Symbol;Acc:HGNC:10307]
ENSG00000102804	TSC22D1	-1.195	0.000788716	0.0201769	13	44432143	44577147	TSC22 domain family member 1 [Source:HGNC Symbol;Acc:HGNC:16826]
ENSG00000100902	PSMA6	-1.19253	0.000415626	0.013204	14	35278633	35317493	proteasome subunit alpha 6 [Source:HGNC Symbol;Acc:HGNC:9535]
ENSG00000141644	MBD1	-1.18455	5.00159e-05	0.00339901	18	50266882	50281774	methyl-CpG binding domain protein 1 [Source:HGNC Symbol;Acc:HGNC:6916]
ENSG00000158201	ABHD3	-1.1833	2.76195e-08	1.78472e-05	18	21650897	21704805	abhydrolase domain containing 3 [Source:HGNC Symbol;Acc:HGNC:18718]
ENSG00000125733	TRIP10	-1.17841	0.000453574	0.0140016	19	6737925	6751526	thyroid hormone receptor interactor 10 [Source:HGNC Symbol;Acc:HGNC:12304]
ENSG00000072201	LNX1	-1.17609	0.00149361	0.0307328	4	53459301	53701405	ligand of numb-protein X 1 [Source:HGNC Symbol;Acc:HGNC:6657]
ENSG00000188042	ARL4C	-1.17325	0.000431854	0.0135189	2	234493041	234497053	ADP ribosylation factor like GTPase 4C [Source:HGNC Symbol;Acc:HGNC:698]
ENSG00000153814	JAZF1	-1.1714	6.60942e-05	0.00396836	7	27830573	28180743	JAZF zinc finger 1 [Source:HGNC Symbol;Acc:HGNC:28917]
ENSG00000249855	EEF1A1P19	-1.17014	0.002876	0.046432	5	43495073	43496454	eukaryotic translation elongation factor 1 alpha 1 pseudogene 19 [Source:HGNC Symbol;Acc:HGNC:37892]
ENSG00000146457	WTAP	-1.16993	0.000280388	0.00984435	6	159725585	159756319	Wilms tumor 1 associated protein [Source:HGNC Symbol;Acc:HGNC:16846]
ENSG00000101665	SMAD7	-1.15645	0.00161319	0.0323539	18	48919853	48950711	SMAD family member 7 [Source:HGNC Symbol;Acc:HGNC:6773]
ENSG00000125249	RAP2A	-1.15276	1.12219e-08	9.28634e-06	13	97434222	97469128	RAP2A, member of RAS oncogene family [Source:HGNC Symbol;Acc:HGNC:9861]
ENSG00000140022	STON2	-1.14667	0.00115406	0.0258172	14	81260656	81436465	stonin 2 [Source:HGNC Symbol;Acc:HGNC:30652]
ENSG00000167895	TMC8	-1.14595	0.00199124	0.0370471	17	78130770	78142968	transmembrane channel like 8 [Source:HGNC Symbol;Acc:HGNC:20474]
ENSG00000160570	DEDD2	-1.14425	0.00140119	0.0293064	19	42198598	42220140	death effector domain containing 2 [Source:HGNC Symbol;Acc:HGNC:24450]
ENSG00000189221	MAOA	-1.144	0.0014799	0.0305632	X	43654907	43746824	monoamine oxidase A [Source:HGNC Symbol;Acc:HGNC:6833]
ENSG00000122591	FAM126A	-1.14332	0.000259292	0.00941816	7	22889371	23014130	family with sequence similarity 126 member A [Source:HGNC Symbol;Acc:HGNC:24587]
ENSG00000117036	ETV3	-1.14116	0.000144163	0.0066143	1	157121191	157138474	ETS variant 3 [Source:HGNC Symbol;Acc:HGNC:3492]
ENSG00000185947	ZNF267	-1.13936	0.00243618	0.0422633	16	31873758	31917357	zinc finger protein 267 [Source:HGNC Symbol;Acc:HGNC:13060]
ENSG00000139112	GABARAPL1	-1.13929	5.69549e-05	0.00363729	12	10212458	10223130	GABA type A receptor associated protein like 1 [Source:HGNC Symbol;Acc:HGNC:4068]
ENSG00000120696	KBTBD7	-1.1379	1.91648e-05	0.00183299	13	41189833	41194566	kelch repeat and BTB domain containing 7 [Source:HGNC Symbol;Acc:HGNC:25266]
ENSG00000204520	MICA	-1.13754	7.08474e-05	0.00413631	6	31399784	31415315	MHC class I polypeptide-related sequence A [Source:HGNC Symbol;Acc:HGNC:7090]
ENSG00000168246	UBTD2	-1.13751	0.000594509	0.0170155	5	172209640	172284071	ubiquitin domain containing 2 [Source:HGNC Symbol;Acc:HGNC:24463]
ENSG00000159128	IFNGR2	-1.13642	0.0022892	0.0405306	21	33402896	33479348	interferon gamma receptor 2 [Source:HGNC Symbol;Acc:HGNC:5440]
ENSG00000172766	NAA16	-1.13511	2.063e-07	7.73522e-05	13	41311205	41377030	N(alpha)-acetyltransferase 16, NatA auxiliary subunit [Source:HGNC Symbol;Acc:HGNC:26164]
ENSG00000021355	SERPINB1	-1.13488	0.000563024	0.0164492	6	2832332	2842006	serpin family B member 1 [Source:HGNC Symbol;Acc:HGNC:3311]
ENSG00000117595	IRF6	-1.13452	0.000106352	0.00531286	1	209785623	209806175	interferon regulatory factor 6 [Source:HGNC Symbol;Acc:HGNC:6121]
ENSG00000099992	TBC1D10A	-1.13396	0.000753318	0.0198037	22	30291990	30327046	TBC1 domain family member 10A [Source:HGNC Symbol;Acc:HGNC:23609]
ENSG00000136156	ITM2B	-1.13066	2.96304e-05	0.00237956	13	48233158	48270357	integral membrane protein 2B [Source:HGNC Symbol;Acc:HGNC:6174]
ENSG00000250303	RP11-356J5.12	-1.12833	0.00050994	0.0153086	11	112270749	112362534
ENSG00000130821	SLC6A8	-1.1283	0.00135186	0.0286726	X	153688099	153696593	solute carrier family 6 member 8 [Source:HGNC Symbol;Acc:HGNC:11055]
ENSG00000138311	ZNF365	-1.12533	0.0022668	0.0403593	10	62374192	62672011	zinc finger protein 365 [Source:HGNC Symbol;Acc:HGNC:18194]
ENSG00000124496	TRERF1	-1.12426	0.00305487	0.048332	6	42224931	42452051	transcriptional regulating factor 1 [Source:HGNC Symbol;Acc:HGNC:18273]
ENSG00000162496	DHRS3	-1.12296	0.00323861	0.04967	1	12567910	12617731	dehydrogenase/reductase 3 [Source:HGNC Symbol;Acc:HGNC:17693]
ENSG00000145860	RNF145	-1.1199	1.77888e-05	0.00171997	5	159157409	159210053	ring finger protein 145 [Source:HGNC Symbol;Acc:HGNC:20853]
ENSG00000197956	S100A6	-1.11952	3.6336e-05	0.00274521	1	153534599	153536244	S100 calcium binding protein A6 [Source:HGNC Symbol;Acc:HGNC:10496]
ENSG00000145780	FEM1C	-1.11823	0.000346915	0.0113451	5	115520908	115544894	fem-1 homolog C [Source:HGNC Symbol;Acc:HGNC:16933]
ENSG00000222047	C10orf55	-1.11602	0.00180771	0.0347889	10	73909969	73922777	chromosome 10 open reading frame 55 [Source:HGNC Symbol;Acc:HGNC:31008]
ENSG00000164463	CREBRF	-1.11561	0.00105597	0.02454	5	173056352	173139284	CREB3 regulatory factor [Source:HGNC Symbol;Acc:HGNC:24050]
ENSG00000121741	ZMYM2	-1.1127	5.50268e-12	2.09465e-08	13	19958670	20091829	zinc finger MYM-type containing 2 [Source:HGNC Symbol;Acc:HGNC:12989]
ENSG00000166974	MAPRE2	-1.1124	1.30253e-08	1.03296e-05	18	34976928	35143470	microtubule associated protein RP/EB family member 2 [Source:HGNC Symbol;Acc:HGNC:6891]
ENSG00000143995	MEIS1	-1.1104	0.00212974	0.038495	2	66433452	66573869	Meis homeobox 1 [Source:HGNC Symbol;Acc:HGNC:7000]
ENSG00000152518	ZFP36L2	-1.10283	7.38602e-05	0.0041685	2	43222402	43226609	ZFP36 ring finger protein like 2 [Source:HGNC Symbol;Acc:HGNC:1108]
ENSG00000084636	COL16A1	-1.101	0.000166873	0.00718985	1	31652247	31704319	collagen type XVI alpha 1 chain [Source:HGNC Symbol;Acc:HGNC:2193]
ENSG00000139163	ETNK1	-1.10015	0.000238526	0.00895435	12	22625075	22690665	ethanolamine kinase 1 [Source:HGNC Symbol;Acc:HGNC:24649]
ENSG00000116514	RNF19B	-1.09887	0.0020138	0.0372326	1	32936445	32964685	ring finger protein 19B [Source:HGNC Symbol;Acc:HGNC:26886]
ENSG00000164086	DUSP7	-1.09592	5.18025e-05	0.00343525	3	52048919	52056550	dual specificity phosphatase 7 [Source:HGNC Symbol;Acc:HGNC:3073]
ENSG00000179833	SERTAD2	-1.09436	2.4737e-05	0.00221042	2	64631621	64751005	SERTA domain containing 2 [Source:HGNC Symbol;Acc:HGNC:30784]
ENSG00000173848	NET1	-1.09027	0.000252086	0.00931573	10	5412551	5458463	neuroepithelial cell transforming 1 [Source:HGNC Symbol;Acc:HGNC:14592]
ENSG00000197081	IGF2R	-1.08946	0.000249619	0.00926122	6	159969099	160113507	insulin like growth factor 2 receptor [Source:HGNC Symbol;Acc:HGNC:5467]
ENSG00000147854	UHRF2	-1.08892	6.52084e-05	0.00392757	9	6413151	6507054	ubiquitin like with PHD and ring finger domains 2 [Source:HGNC Symbol;Acc:HGNC:12557]
ENSG00000131435	PDLIM4	-1.08696	8.88027e-05	0.00479059	5	132257671	132273454	PDZ and LIM domain 4 [Source:HGNC Symbol;Acc:HGNC:16501]
ENSG00000026297	RNASET2	-1.08163	5.36418e-05	0.00348452	6	166929504	166957191	ribonuclease T2 [Source:HGNC Symbol;Acc:HGNC:21686]
ENSG00000175106	TVP23C	-1.08146	0.000761374	0.0199055	17	15502264	15563595	trans-golgi network vesicle protein 23 homolog C [Source:HGNC Symbol;Acc:HGNC:30453]
ENSG00000154832	CXXC1	-1.07794	0.000517392	0.0154545	18	50282343	50288304	CXXC finger protein 1 [Source:HGNC Symbol;Acc:HGNC:24343]
ENSG00000116679	IVNS1ABP	-1.07308	4.27135e-07	0.000125072	1	185296388	185317329	influenza virus NS1A binding protein [Source:HGNC Symbol;Acc:HGNC:16951]
ENSG00000112739	PRPF4B	-1.07002	6.10764e-05	0.00376885	6	4021267	4064983	pre-mRNA processing factor 4B [Source:HGNC Symbol;Acc:HGNC:17346]
ENSG00000165195	PIGA	-1.06798	0.000263896	0.00953081	X	15319451	15335580	phosphatidylinositol glycan anchor biosynthesis class A [Source:HGNC Symbol;Acc:HGNC:8957]
ENSG00000105339	DENND3	-1.06637	0.000435805	0.0135978	8	141117278	141195808	DENN domain containing 3 [Source:HGNC Symbol;Acc:HGNC:29134]
ENSG00000204386	NEU1	-1.0647	0.00127958	0.0277917	6	31857659	31862906	neuraminidase 1 [Source:HGNC Symbol;Acc:HGNC:7758]
ENSG00000165806	CASP7	-1.06103	0.00114123	0.0257505	10	113679162	113730907	caspase 7 [Source:HGNC Symbol;Acc:HGNC:1508]
ENSG00000176788	BASP1	-1.05983	0.000237644	0.00893888	5	17065598	17276843	brain abundant membrane attached signal protein 1 [Source:HGNC Symbol;Acc:HGNC:957]
ENSG00000075213	SEMA3A	-1.05486	0.000651978	0.017996	7	83955777	84492724	semaphorin 3A [Source:HGNC Symbol;Acc:HGNC:10723]
ENSG00000215483	LINC00598	-1.05293	0.0030547	0.048332	13	40079106	40535807	long intergenic non-protein coding RNA 598 [Source:HGNC Symbol;Acc:HGNC:42770]
ENSG00000185022	MAFF	-1.04989	0.00231406	0.040781	22	38200767	38216511	MAF bZIP transcription factor F [Source:HGNC Symbol;Acc:HGNC:6780]
ENSG00000153944	MSI2	-1.04898	0.00106496	0.0246511	17	57255851	57684685	musashi RNA binding protein 2 [Source:HGNC Symbol;Acc:HGNC:18585]
ENSG00000118518	RNF146	-1.04857	0.000321472	0.0107721	6	127266610	127288567	ring finger protein 146 [Source:HGNC Symbol;Acc:HGNC:21336]
ENSG00000197930	ERO1A	-1.04511	9.70101e-05	0.00504479	14	52639916	52695900	endoplasmic reticulum oxidoreductase 1 alpha [Source:HGNC Symbol;Acc:HGNC:13280]
ENSG00000138764	CCNG2	-1.04337	0.000274016	0.00969394	4	77157151	77433388	cyclin G2 [Source:HGNC Symbol;Acc:HGNC:1593]
ENSG00000132952	USPL1	-1.04286	3.96554e-06	0.000613627	13	30617693	30660770	ubiquitin specific peptidase like 1 [Source:HGNC Symbol;Acc:HGNC:20294]
ENSG00000134755	DSC2	-1.0403	1.57689e-05	0.00157136	18	31058840	31102415	desmocollin 2 [Source:HGNC Symbol;Acc:HGNC:3036]
ENSG00000152061	RABGAP1L	-1.03487	0.0007696	0.0199142	1	174159410	174995308	RAB GTPase activating protein 1 like [Source:HGNC Symbol;Acc:HGNC:24663]
ENSG00000169635	HIC2	-1.03323	0.0030311	0.0481561	22	21417404	21451463	HIC ZBTB transcriptional repressor 2 [Source:HGNC Symbol;Acc:HGNC:18595]
ENSG00000075426	FOSL2	-1.03077	0.00127219	0.0277917	2	28392448	28417312	FOS like 2, AP-1 transcription factor subunit [Source:HGNC Symbol;Acc:HGNC:3798]
ENSG00000142192	APP	-1.0276	0.0001311	0.00610079	21	25880550	26171128	amyloid beta precursor protein [Source:HGNC Symbol;Acc:HGNC:620]
ENSG00000123388	HOXC11	-1.02004	0.0027328	0.0453473	12	53973126	53977643	homeobox C11 [Source:HGNC Symbol;Acc:HGNC:5123]
ENSG00000108819	PPP1R9B	-1.01767	0.00141226	0.0294733	17	50133735	50150630	protein phosphatase 1 regulatory subunit 9B [Source:HGNC Symbol;Acc:HGNC:9298]
ENSG00000124788	ATXN1	-1.01137	0.00224529	0.0402019	6	16299112	16761491	ataxin 1 [Source:HGNC Symbol;Acc:HGNC:10548]
ENSG00000079459	FDFT1	-1.01108	0.00159485	0.0321555	8	11795573	11839309	farnesyl-diphosphate farnesyltransferase 1 [Source:HGNC Symbol;Acc:HGNC:3629]
ENSG00000125845	BMP2	-1.01003	0.000963263	0.0229459	20	6767664	6780280	bone morphogenetic protein 2 [Source:HGNC Symbol;Acc:HGNC:1069]
ENSG00000134874	DZIP1	-1.00695	0.000377195	0.0121269	13	95578202	95644703	DAZ interacting zinc finger protein 1 [Source:HGNC Symbol;Acc:HGNC:20908]
ENSG00000113240	CLK4	-1.00613	1.28958e-05	0.00136358	5	178602664	178630615	CDC like kinase 4 [Source:HGNC Symbol;Acc:HGNC:13659]
ENSG00000156976	EIF4A2	-1.00517	0.00261881	0.0443055	3	186783205	186789900	eukaryotic translation initiation factor 4A2 [Source:HGNC Symbol;Acc:HGNC:3284]
ENSG00000137338	PGBD1	-1.00148	0.00235845	0.0412198	6	28281572	28302549	piggyBac transposable element derived 1 [Source:HGNC Symbol;Acc:HGNC:19398]
ENSG00000006451	RALA	-0.999788	0.00113073	0.025651	7	39623483	39708124	RAS like proto-oncogene A [Source:HGNC Symbol;Acc:HGNC:9839]
ENSG00000183506	PI4KAP2	-0.997251	0.00219397	0.0393941	22	21473000	21517533	phosphatidylinositol 4-kinase alpha pseudogene 2 [Source:HGNC Symbol;Acc:HGNC:33577]

## Sheet: GefT vs Control SCC34-PDX UP
Supplementary Table S1: Genes with upregulated expression in GefT SCC34-PDX vs Control SCC34-PDX (padj<0.05; FC>2)
ID	Gene Symbol	log2 Fold Change GefR vs Control SCC34-PDX	pvalue GefR vs Control SCC34-PDX	padj GefR vs Control SCC34-PDX	chromosome name	start position	end position	description
ENSG00000251129	RP11-734I18.1	6.61	0.00137	0.0436	4	31997397	32155406
ENSG00000125144	MT1G	5.98	0.00138	0.0436	16	56666731	56668065	metallothionein 1G [Source:HGNC Symbol;Acc:HGNC:7399]
ENSG00000272620	AFAP1-AS1	5.08	0.000972	0.0348	4	7754090	7778928	AFAP1 antisense RNA 1 [Source:HGNC Symbol;Acc:HGNC:28141]
ENSG00000129596	CDO1	4.69	0.000455	0.0199	5	115804733	115816954	cysteine dioxygenase type 1 [Source:HGNC Symbol;Acc:HGNC:1795]
ENSG00000150281	CTF1	4.42	9.03e-05	0.00575	16	30896607	30903560	cardiotrophin 1 [Source:HGNC Symbol;Acc:HGNC:2499]
ENSG00000164125	FAM198B	3.97	1.9e-08	4.55e-06	4	158124474	158173318	family with sequence similarity 198 member B [Source:HGNC Symbol;Acc:HGNC:25312]
ENSG00000280002	RP11-76C10.6	3.94	0.00153	0.0472	12	130988312	130990028
ENSG00000267327	CTD-2008L17.1	3.72	0.00112	0.0381	18	55893038	56023522
ENSG00000231419	LINC00689	3.67	5.23e-05	0.00382	7	159006522	159030195	long intergenic non-protein coding RNA 689 [Source:HGNC Symbol;Acc:HGNC:27217]
ENSG00000117148	ACTL8	3.34	5.91e-07	8.63e-05	1	17755313	17827063	actin like 8 [Source:HGNC Symbol;Acc:HGNC:24018]
ENSG00000269994	RP11-276H19.2	3.2	1.71e-07	3.06e-05	9	87008455	87042126
ENSG00000214107	MAGEB1	2.99	0.00158	0.0481	X	30243730	30252038	MAGE family member B1 [Source:HGNC Symbol;Acc:HGNC:6808]
ENSG00000232445	RP11-132A1.4	2.91	0.00133	0.0428	7	101308346	101310985
ENSG00000229807	XIST	2.8	5.47e-05	0.00392	X	73820651	73852753	X inactive specific transcript (non-protein coding) [Source:HGNC Symbol;Acc:HGNC:12810]
ENSG00000022556	NLRP2	2.79	1.71e-07	3.06e-05	19	54953130	55001142	NLR family pyrin domain containing 2 [Source:HGNC Symbol;Acc:HGNC:22948]
ENSG00000267265	CTC-550B14.7	2.76	0.00031	0.0147	19	55006193	55048086
ENSG00000204381	LAYN	2.69	0.00057	0.0234	11	111540280	111561745	layilin [Source:HGNC Symbol;Acc:HGNC:29471]
ENSG00000123407	HOXC12	2.64	1.98e-06	0.000254	12	53954834	53958956	homeobox C12 [Source:HGNC Symbol;Acc:HGNC:5124]
ENSG00000164691	TAGAP	2.59	0.00146	0.0458	6	159034468	159045152	T-cell activation RhoGTPase activating protein [Source:HGNC Symbol;Acc:HGNC:15669]
ENSG00000179133	C10orf67	2.47	0.000466	0.0202	10	23201916	23344845	chromosome 10 open reading frame 67 [Source:HGNC Symbol;Acc:HGNC:28716]
ENSG00000165124	SVEP1	2.45	7.11e-07	0.000101	9	110365251	110579880	sushi, von Willebrand factor type A, EGF and pentraxin domain containing 1 [Source:HGNC Symbol;Acc:HGNC:15985]
ENSG00000091128	LAMB4	2.44	0.00126	0.0413	7	108023548	108130356	laminin subunit beta 4 [Source:HGNC Symbol;Acc:HGNC:6491]
ENSG00000198208	RPS6KL1	2.36	9.18e-05	0.00581	14	74903954	74923396	ribosomal protein S6 kinase like 1 [Source:HGNC Symbol;Acc:HGNC:20222]
ENSG00000260518	BMS1P8	2.34	2.81e-05	0.00228	16	33687025	33698504	BMS1, ribosome biogenesis factor pseudogene 8 [Source:HGNC Symbol;Acc:HGNC:49152]
ENSG00000170153	RNF150	2.25	6.85e-05	0.00458	4	140859807	141212877	ring finger protein 150 [Source:HGNC Symbol;Acc:HGNC:23138]
ENSG00000170627	GTSF1	2.23	1.47e-11	7.02e-09	12	54455950	54473602	gametocyte specific factor 1 [Source:HGNC Symbol;Acc:HGNC:26565]
ENSG00000019186	CYP24A1	2.23	1.79e-06	0.000232	20	54153449	54173973	cytochrome P450 family 24 subfamily A member 1 [Source:HGNC Symbol;Acc:HGNC:2602]
ENSG00000147642	SYBU	2.21	2.13e-07	3.55e-05	8	109573978	109691791	syntabulin [Source:HGNC Symbol;Acc:HGNC:26011]
ENSG00000250742	RP11-834C11.4	2.12	0.000515	0.0216	12	54126098	54142493
ENSG00000118596	SLC16A7	1.93	9.75e-05	0.00607	12	59596067	59789855	solute carrier family 16 member 7 [Source:HGNC Symbol;Acc:HGNC:10928]
ENSG00000248713	RP11-766F14.2	1.88	3.27e-05	0.00259	4	99636529	99654648
ENSG00000109265	KIAA1211	1.83	0.000301	0.0144	4	56049073	56328625	KIAA1211 [Source:HGNC Symbol;Acc:HGNC:29219]
ENSG00000069702	TGFBR3	1.78	0.000985	0.0351	1	91680343	91906335	transforming growth factor beta receptor 3 [Source:HGNC Symbol;Acc:HGNC:11774]
ENSG00000096060	FKBP5	1.76	2.41e-07	3.98e-05	6	35573585	35728583	FK506 binding protein 5 [Source:HGNC Symbol;Acc:HGNC:3721]
ENSG00000136859	ANGPTL2	1.76	0.0014	0.044	9	127087332	127122883	angiopoietin like 2 [Source:HGNC Symbol;Acc:HGNC:490]
ENSG00000213225	NOC2LP1	1.73	6.21e-05	0.00428	2	130229379	130232106	NOC2 like nucleolar associated transcriptional repressor pseudogene 1 [Source:HGNC Symbol;Acc:HGNC:52285]
ENSG00000226887	ERVMER34-1	1.7	6.14e-09	1.63e-06	4	52722618	52751640	endogenous retrovirus group MER34 member 1 [Source:HGNC Symbol;Acc:HGNC:42970]
ENSG00000185585	OLFML2A	1.7	0.000496	0.021	9	124777158	124814885	olfactomedin like 2A [Source:HGNC Symbol;Acc:HGNC:27270]
ENSG00000198910	L1CAM	1.66	8.53e-07	0.000117	X	153861514	153909223	L1 cell adhesion molecule [Source:HGNC Symbol;Acc:HGNC:6470]
ENSG00000165480	SKA3	1.62	0.000192	0.0103	13	21153595	21176602	spindle and kinetochore associated complex subunit 3 [Source:HGNC Symbol;Acc:HGNC:20262]
ENSG00000066279	ASPM	1.61	0.00017	0.00946	1	197084128	197146694	abnormal spindle microtubule assembly [Source:HGNC Symbol;Acc:HGNC:19048]
ENSG00000164749	HNF4G	1.6	5.32e-05	0.00384	8	75407914	75566843	hepatocyte nuclear factor 4 gamma [Source:HGNC Symbol;Acc:HGNC:5026]
ENSG00000158691	ZSCAN12	1.59	9.75e-05	0.00607	6	28378955	28399734	zinc finger and SCAN domain containing 12 [Source:HGNC Symbol;Acc:HGNC:13172]
ENSG00000112984	KIF20A	1.56	2.48e-07	4.02e-05	5	138178719	138187715	kinesin family member 20A [Source:HGNC Symbol;Acc:HGNC:9787]
ENSG00000117724	CENPF	1.56	4.49e-07	6.77e-05	1	214603195	214664588	centromere protein F [Source:HGNC Symbol;Acc:HGNC:1857]
ENSG00000070019	GUCY2C	1.53	0.000551	0.0227	12	14612632	14696585	guanylate cyclase 2C [Source:HGNC Symbol;Acc:HGNC:4688]
ENSG00000130518	KIAA1683	1.53	0.00156	0.0477	19	18257097	18274509	KIAA1683 [Source:HGNC Symbol;Acc:HGNC:29350]
ENSG00000081985	IL12RB2	1.52	0.000462	0.0201	1	67307364	67396900	interleukin 12 receptor subunit beta 2 [Source:HGNC Symbol;Acc:HGNC:5972]
ENSG00000109805	NCAPG	1.51	4.51e-05	0.00338	4	17810902	17844862	non-SMC condensin I complex subunit G [Source:HGNC Symbol;Acc:HGNC:24304]
ENSG00000164099	PRSS12	1.48	3.19e-05	0.00255	4	118280038	118353003	protease, serine 12 [Source:HGNC Symbol;Acc:HGNC:9477]
ENSG00000024526	DEPDC1	1.48	0.000206	0.0109	1	68474152	68497221	DEP domain containing 1 [Source:HGNC Symbol;Acc:HGNC:22949]
ENSG00000115380	EFEMP1	1.44	9.52e-06	0.000943	2	55865967	55924139	EGF containing fibulin like extracellular matrix protein 1 [Source:HGNC Symbol;Acc:HGNC:3218]
ENSG00000220154	RP11-46B11.2	1.44	8.85e-05	0.00568	6	79278105	79278427
ENSG00000158186	MRAS	1.43	1.85e-07	3.19e-05	3	138347648	138405534	muscle RAS oncogene homolog [Source:HGNC Symbol;Acc:HGNC:7227]
ENSG00000185760	KCNQ5	1.43	0.000741	0.0286	6	72621792	73198851	potassium voltage-gated channel subfamily Q member 5 [Source:HGNC Symbol;Acc:HGNC:6299]
ENSG00000108578	BLMH	1.43	0.00138	0.0436	17	30248195	30292056	bleomycin hydrolase [Source:HGNC Symbol;Acc:HGNC:1059]
ENSG00000165152	TMEM246	1.42	1.82e-07	3.16e-05	9	101473171	101533537	transmembrane protein 246 [Source:HGNC Symbol;Acc:HGNC:28180]
ENSG00000075218	GTSE1	1.39	4.93e-07	7.31e-05	22	46296741	46330810	G2 and S-phase expressed 1 [Source:HGNC Symbol;Acc:HGNC:13698]
ENSG00000087586	AURKA	1.39	4.25e-06	0.000478	20	56369389	56392337	aurora kinase A [Source:HGNC Symbol;Acc:HGNC:11393]
ENSG00000145386	CCNA2	1.38	0.000239	0.0122	4	121816444	121823933	cyclin A2 [Source:HGNC Symbol;Acc:HGNC:1578]
ENSG00000154153	FAM134B	1.37	3.58e-09	1.02e-06	5	16473038	16617058	family with sequence similarity 134 member B [Source:HGNC Symbol;Acc:HGNC:25964]
ENSG00000126787	DLGAP5	1.37	6.21e-06	0.00066	14	55148112	55191678	DLG associated protein 5 [Source:HGNC Symbol;Acc:HGNC:16864]
ENSG00000006042	TMEM98	1.37	0.000139	0.00806	17	32927910	32945106	transmembrane protein 98 [Source:HGNC Symbol;Acc:HGNC:24529]
ENSG00000105072	C19orf44	1.36	0.000294	0.0142	19	16496311	16521352	chromosome 19 open reading frame 44 [Source:HGNC Symbol;Acc:HGNC:26141]
ENSG00000156970	BUB1B	1.34	7.23e-05	0.00479	15	40161023	40221136	BUB1 mitotic checkpoint serine/threonine kinase B [Source:HGNC Symbol;Acc:HGNC:1149]
ENSG00000106484	MEST	1.33	3.17e-07	5.09e-05	7	130486171	130506296	mesoderm specific transcript [Source:HGNC Symbol;Acc:HGNC:7028]
ENSG00000158402	CDC25C	1.33	0.000168	0.00939	5	138285265	138338355	cell division cycle 25C [Source:HGNC Symbol;Acc:HGNC:1727]
ENSG00000089685	BIRC5	1.31	2.53e-05	0.0021	17	78214186	78225636	baculoviral IAP repeat containing 5 [Source:HGNC Symbol;Acc:HGNC:593]
ENSG00000157456	CCNB2	1.31	0.000143	0.00825	15	59105078	59125045	cyclin B2 [Source:HGNC Symbol;Acc:HGNC:1580]
ENSG00000100490	CDKL1	1.3	2.13e-05	0.00189	14	50329404	50416461	cyclin dependent kinase like 1 [Source:HGNC Symbol;Acc:HGNC:1781]
ENSG00000173621	LRFN4	1.3	6.51e-05	0.0044	11	66856647	66860475	leucine rich repeat and fibronectin type III domain containing 4 [Source:HGNC Symbol;Acc:HGNC:28456]
ENSG00000165568	AKR1E2	1.3	0.000946	0.0341	10	4786629	4848062	aldo-keto reductase family 1 member E2 [Source:HGNC Symbol;Acc:HGNC:23437]
ENSG00000137812	KNL1	1.29	0.000953	0.0343	15	40594020	40664342	kinetochore scaffold 1 [Source:HGNC Symbol;Acc:HGNC:24054]
ENSG00000123485	HJURP	1.27	0.000227	0.0119	2	233833416	233854566	Holliday junction recognition protein [Source:HGNC Symbol;Acc:HGNC:25444]
ENSG00000132561	MATN2	1.26	0.000189	0.0102	8	97868840	98036716	matrilin 2 [Source:HGNC Symbol;Acc:HGNC:6908]
ENSG00000185875	THNSL1	1.26	0.000897	0.0328	10	25016658	25026664	threonine synthase like 1 [Source:HGNC Symbol;Acc:HGNC:26160]
ENSG00000164109	MAD2L1	1.25	0.00109	0.0377	4	120055608	120067074	MAD2 mitotic arrest deficient-like 1 (yeast) [Source:HGNC Symbol;Acc:HGNC:6763]
ENSG00000164684	ZNF704	1.24	0.00113	0.0382	8	80628451	80874781	zinc finger protein 704 [Source:HGNC Symbol;Acc:HGNC:32291]
ENSG00000131747	TOP2A	1.23	7.02e-05	0.00466	17	40388516	40417950	topoisomerase (DNA) II alpha [Source:HGNC Symbol;Acc:HGNC:11989]
ENSG00000138735	PDE5A	1.22	8.99e-06	0.000897	4	119494395	119628991	phosphodiesterase 5A [Source:HGNC Symbol;Acc:HGNC:8784]
ENSG00000260916	CCPG1	1.22	0.00105	0.0367	15	55340032	55408510	cell cycle progression 1 [Source:HGNC Symbol;Acc:HGNC:24227]
ENSG00000187957	DNER	1.21	0.000153	0.00871	2	229357629	229714558	delta/notch like EGF repeat containing [Source:HGNC Symbol;Acc:HGNC:24456]
ENSG00000111665	CDCA3	1.21	0.000272	0.0135	12	6844793	6852066	cell division cycle associated 3 [Source:HGNC Symbol;Acc:HGNC:14624]
ENSG00000165449	SLC16A9	1.21	0.000461	0.0201	10	59650761	59736002	solute carrier family 16 member 9 [Source:HGNC Symbol;Acc:HGNC:23520]
ENSG00000247934	RP11-967K21.1	1.21	0.0015	0.0466	12	28163298	28190738
ENSG00000117650	NEK2	1.2	0.00048	0.0204	1	211658657	211675630	NIMA related kinase 2 [Source:HGNC Symbol;Acc:HGNC:7745]
ENSG00000065328	MCM10	1.2	0.000821	0.0309	10	13161554	13211104	minichromosome maintenance 10 replication initiation factor [Source:HGNC Symbol;Acc:HGNC:18043]
ENSG00000197093	GAL3ST4	1.19	1.26e-05	0.00121	7	100159244	100168750	galactose-3-O-sulfotransferase 4 [Source:HGNC Symbol;Acc:HGNC:24145]
ENSG00000171658	NMRAL2P	1.19	2.25e-05	0.00193	3	185959943	185980872	NmrA like redox sensor 2, pseudogene [Source:HGNC Symbol;Acc:HGNC:52332]
ENSG00000072041	SLC6A15	1.19	0.00146	0.0458	12	84859488	84913615	solute carrier family 6 member 15 [Source:HGNC Symbol;Acc:HGNC:13621]
ENSG00000184661	CDCA2	1.18	6.09e-05	0.00422	8	25458997	25507920	cell division cycle associated 2 [Source:HGNC Symbol;Acc:HGNC:14623]
ENSG00000169679	BUB1	1.18	0.000893	0.0327	2	110637698	110678114	BUB1 mitotic checkpoint serine/threonine kinase [Source:HGNC Symbol;Acc:HGNC:1148]
ENSG00000237649	KIFC1	1.17	2.56e-05	0.00212	6	33391536	33409924	kinesin family member C1 [Source:HGNC Symbol;Acc:HGNC:6389]
ENSG00000138696	BMPR1B	1.17	0.000191	0.0102	4	94757968	95158448	bone morphogenetic protein receptor type 1B [Source:HGNC Symbol;Acc:HGNC:1077]
ENSG00000076351	SLC46A1	1.17	0.000269	0.0135	17	28394756	28407197	solute carrier family 46 member 1 [Source:HGNC Symbol;Acc:HGNC:30521]
ENSG00000204396	VWA7	1.17	0.00128	0.0416	6	31765590	31777294	von Willebrand factor A domain containing 7 [Source:HGNC Symbol;Acc:HGNC:13939]
ENSG00000151491	EPS8	1.16	0.000219	0.0115	12	15620158	15882329	epidermal growth factor receptor pathway substrate 8 [Source:HGNC Symbol;Acc:HGNC:3420]
ENSG00000080986	NDC80	1.15	2.49e-05	0.00209	18	2571511	2616635	NDC80, kinetochore complex component [Source:HGNC Symbol;Acc:HGNC:16909]
ENSG00000164038	SLC9B2	1.15	0.000173	0.00958	4	103019868	103085829	solute carrier family 9 member B2 [Source:HGNC Symbol;Acc:HGNC:25143]
ENSG00000134057	CCNB1	1.15	0.000228	0.0119	5	69167010	69178245	cyclin B1 [Source:HGNC Symbol;Acc:HGNC:1579]
ENSG00000112742	TTK	1.15	0.000447	0.0196	6	80003887	80042527	TTK protein kinase [Source:HGNC Symbol;Acc:HGNC:12401]
ENSG00000197299	BLM	1.15	0.00108	0.0373	15	90717327	90816165	Bloom syndrome RecQ like helicase [Source:HGNC Symbol;Acc:HGNC:1058]
ENSG00000186871	ERCC6L	1.15	0.00166	0.0498	X	72204657	72239047	ERCC excision repair 6 like, spindle assembly checkpoint helicase [Source:HGNC Symbol;Acc:HGNC:20794]
ENSG00000150764	DIXDC1	1.14	0.000251	0.0127	11	111927144	112022584	DIX domain containing 1 [Source:HGNC Symbol;Acc:HGNC:23695]
ENSG00000168743	NPNT	1.14	0.000958	0.0344	4	105894775	106004027	nephronectin [Source:HGNC Symbol;Acc:HGNC:27405]
ENSG00000186185	KIF18B	1.14	0.00137	0.0436	17	44924709	44947711	kinesin family member 18B [Source:HGNC Symbol;Acc:HGNC:27102]
ENSG00000074527	NTN4	1.14	0.00153	0.0472	12	95657807	95791152	netrin 4 [Source:HGNC Symbol;Acc:HGNC:13658]
ENSG00000110203	FOLR3	1.11	0.000236	0.0122	11	72114869	72139892	folate receptor 3 [Source:HGNC Symbol;Acc:HGNC:3795]
ENSG00000134690	CDCA8	1.1	0.000461	0.0201	1	37692418	37709719	cell division cycle associated 8 [Source:HGNC Symbol;Acc:HGNC:14629]
ENSG00000141569	TRIM65	1.09	6.35e-05	0.00434	17	75880335	75897003	tripartite motif containing 65 [Source:HGNC Symbol;Acc:HGNC:27316]
ENSG00000196503	ARL9	1.08	0.000507	0.0214	4	56505209	56524448	ADP ribosylation factor like GTPase 9 [Source:HGNC Symbol;Acc:HGNC:23592]
ENSG00000138778	CENPE	1.08	0.00163	0.0492	4	103105806	103198409	centromere protein E [Source:HGNC Symbol;Acc:HGNC:1856]
ENSG00000077152	UBE2T	1.07	9.05e-05	0.00575	1	202331657	202341980	ubiquitin conjugating enzyme E2 T [Source:HGNC Symbol;Acc:HGNC:25009]
ENSG00000146592	CREB5	1.06	0.000156	0.00885	7	28299321	28825894	cAMP responsive element binding protein 5 [Source:HGNC Symbol;Acc:HGNC:16844]
ENSG00000112759	SLC29A1	1.06	0.000251	0.0127	6	44219505	44234151	solute carrier family 29 member 1 (Augustine blood group) [Source:HGNC Symbol;Acc:HGNC:11003]
ENSG00000170425	ADORA2B	1.06	0.00113	0.0382	17	15944917	15975746	adenosine A2b receptor [Source:HGNC Symbol;Acc:HGNC:264]
ENSG00000163521	GLB1L	1.03	0.000282	0.0139	2	219236606	219245478	galactosidase beta 1 like [Source:HGNC Symbol;Acc:HGNC:28129]
ENSG00000198826	ARHGAP11A	1.03	0.000322	0.0151	15	32615144	32639949	Rho GTPase activating protein 11A [Source:HGNC Symbol;Acc:HGNC:15783]
ENSG00000101003	GINS1	1.03	0.000694	0.0273	20	25407727	25452628	GINS complex subunit 1 [Source:HGNC Symbol;Acc:HGNC:28980]
ENSG00000005243	COPZ2	1.03	0.000895	0.0327	17	48026167	48038030	coatomer protein complex subunit zeta 2 [Source:HGNC Symbol;Acc:HGNC:19356]
ENSG00000234912	SNHG20	1.02	0.000467	0.0202	17	77086716	77094990	small nucleolar RNA host gene 20 [Source:HGNC Symbol;Acc:HGNC:33099]
ENSG00000175063	UBE2C	1.02	0.00154	0.0472	20	45812576	45816957	ubiquitin conjugating enzyme E2 C [Source:HGNC Symbol;Acc:HGNC:15937]
ENSG00000140807	NKD1	1.01	0.000698	0.0274	16	50548330	50649249	naked cuticle homolog 1 [Source:HGNC Symbol;Acc:HGNC:17045]
ENSG00000198901	PRC1	1	0.00117	0.0392	15	90966038	90995629	protein regulator of cytokinesis 1 [Source:HGNC Symbol;Acc:HGNC:9341]
ENSG00000188677	PARVB	1	0.00154	0.0473	22	43999211	44172949	parvin beta [Source:HGNC Symbol;Acc:HGNC:14653]

## Sheet: GefT vs Control SCC34-PDX DOWN
Supplementary Table S1: Genes with downregulated expression in GefT SCC34-PDX vs Control SCC34-PDX (padj<0.05; FC>2)
ID	Gene Symbol	log2 Fold Change GefR vs Control SCC34-PDX	pvalue GefR vs Control SCC34-PDX	padj GefR vs Control SCC34-PDX	chromosome name	start position	end position	description
ENSG00000093134	VNN3	-7.02	3.85e-07	6.05e-05	6	132722787	132734765	vanin 3 [Source:HGNC Symbol;Acc:HGNC:16431]
ENSG00000162670	BRINP3	-6.13	1.83e-16	1.85e-13	1	190097662	190478404	BMP/retinoic acid inducible neural specific 3 [Source:HGNC Symbol;Acc:HGNC:22393]
ENSG00000094755	GABRP	-6.05	8.41e-05	0.00543	5	170763350	170814047	gamma-aminobutyric acid type A receptor pi subunit [Source:HGNC Symbol;Acc:HGNC:4089]
ENSG00000184330	S100A7A	-5.6	9.11e-27	8.71e-23	1	153416524	153423225	S100 calcium binding protein A7A [Source:HGNC Symbol;Acc:HGNC:21657]
ENSG00000242512	LINC01206	-5.19	5.61e-05	0.00397	3	181952343	182010678	long intergenic non-protein coding RNA 1206 [Source:HGNC Symbol;Acc:HGNC:49637]
ENSG00000283167	RP11-1223D19.6	-5.14	0.000436	0.0192	2	110335525	110348944
ENSG00000183166	CALN1	-4.88	7.76e-08	1.56e-05	7	71779491	72447151	calneuron 1 [Source:HGNC Symbol;Acc:HGNC:13248]
ENSG00000157502	MUM1L1	-4.66	5.14e-17	6.15e-14	X	106168305	106208956	MUM1 like 1 [Source:HGNC Symbol;Acc:HGNC:26583]
ENSG00000100985	MMP9	-4.56	1.04e-05	0.00102	20	46008908	46016561	matrix metallopeptidase 9 [Source:HGNC Symbol;Acc:HGNC:7176]
ENSG00000137673	MMP7	-4.53	0.000112	0.0068	11	102520508	102530753	matrix metallopeptidase 7 [Source:HGNC Symbol;Acc:HGNC:7174]
ENSG00000143556	S100A7	-4.5	4.24e-20	8.12e-17	1	153457744	153460701	S100 calcium binding protein A7 [Source:HGNC Symbol;Acc:HGNC:10497]
ENSG00000124391	IL17C	-4.49	0.000474	0.0202	16	88638591	88640473	interleukin 17C [Source:HGNC Symbol;Acc:HGNC:5983]
ENSG00000167768	KRT1	-4.37	1.21e-16	1.28e-13	12	52674736	52680407	keratin 1 [Source:HGNC Symbol;Acc:HGNC:6412]
ENSG00000102362	SYTL4	-4.33	8.12e-05	0.00529	X	100674491	100732123	synaptotagmin like 4 [Source:HGNC Symbol;Acc:HGNC:15588]
ENSG00000196805	SPRR2B	-4.24	9.7e-20	1.69e-16	1	153070224	153070840	small proline rich protein 2B [Source:HGNC Symbol;Acc:HGNC:11262]
ENSG00000075673	ATP12A	-4.13	0.000141	0.00816	13	24680411	24712493	ATPase H+/K+ transporting non-gastric alpha2 subunit [Source:HGNC Symbol;Acc:HGNC:13816]
ENSG00000255442	RP11-347H15.1	-4.09	3.26e-06	0.000384	11	50170156	50190441
ENSG00000198223	CSF2RA	-4.01	0.000155	0.0088	X	1268800	1310381	colony stimulating factor 2 receptor alpha subunit [Source:HGNC Symbol;Acc:HGNC:2435]
ENSG00000206073	SERPINB4	-4	2.27e-13	1.49e-10	18	63637259	63644298	serpin family B member 4 [Source:HGNC Symbol;Acc:HGNC:10570]
ENSG00000203786	KPRP	-4	1.39e-06	0.000184	1	152759561	152762052	keratinocyte proline rich protein [Source:HGNC Symbol;Acc:HGNC:31823]
ENSG00000103449	SALL1	-3.98	2.26e-18	3.33e-15	16	51135975	51151367	spalt like transcription factor 1 [Source:HGNC Symbol;Acc:HGNC:10524]
ENSG00000188508	KRTDAP	-3.98	8.37e-15	7.28e-12	19	35487324	35495558	keratinocyte differentiation associated protein [Source:HGNC Symbol;Acc:HGNC:16313]
ENSG00000162511	LAPTM5	-3.79	0.000181	0.00988	1	30732469	30757820	lysosomal protein transmembrane 5 [Source:HGNC Symbol;Acc:HGNC:29612]
ENSG00000204539	CDSN	-3.75	2.36e-30	4.52e-26	6	31115090	31120446	corneodesmosin [Source:HGNC Symbol;Acc:HGNC:1802]
ENSG00000169946	ZFPM2	-3.73	7.67e-16	7.34e-13	8	104590733	105804532	zinc finger protein, FOG family member 2 [Source:HGNC Symbol;Acc:HGNC:16700]
ENSG00000136694	IL36A	-3.72	1.99e-05	0.0018	2	113005461	113008044	interleukin 36, alpha [Source:HGNC Symbol;Acc:HGNC:15562]
ENSG00000204099	NEU4	-3.68	2.65e-10	9.92e-08	2	241808825	241817413	neuraminidase 4 [Source:HGNC Symbol;Acc:HGNC:21328]
ENSG00000172867	KRT2	-3.68	2.38e-06	0.000297	12	52644558	52652164	keratin 2 [Source:HGNC Symbol;Acc:HGNC:6439]
ENSG00000108342	CSF3	-3.61	0.000472	0.0202	17	40015361	40017813	colony stimulating factor 3 [Source:HGNC Symbol;Acc:HGNC:2438]
ENSG00000154252	GAL3ST2	-3.59	0.00165	0.0498	2	241776825	241804208	galactose-3-O-sulfotransferase 2 [Source:HGNC Symbol;Acc:HGNC:24869]
ENSG00000164690	SHH	-3.58	4.19e-05	0.00322	7	155799986	155812273	sonic hedgehog [Source:HGNC Symbol;Acc:HGNC:10848]
ENSG00000224272	AC114730.3	-3.56	9.47e-05	0.00598	2	241808312	241812016
ENSG00000225899	FRG2B	-3.53	0.000861	0.032	10	133623895	133626795	FSHD region gene 2 family member B [Source:HGNC Symbol;Acc:HGNC:33518]
ENSG00000057149	SERPINB3	-3.5	0.000239	0.0122	18	63655197	63661963	serpin family B member 3 [Source:HGNC Symbol;Acc:HGNC:10569]
ENSG00000277632	CCL3	-3.49	5.56e-08	1.17e-05	17	36088256	36090169	C-C motif chemokine ligand 3 [Source:HGNC Symbol;Acc:HGNC:10627]
ENSG00000135074	ADAM19	-3.45	4.44e-07	6.77e-05	5	157395534	157575775	ADAM metallopeptidase domain 19 [Source:HGNC Symbol;Acc:HGNC:197]
ENSG00000124102	PI3	-3.44	0.000111	0.00675	20	45174876	45176544	peptidase inhibitor 3 [Source:HGNC Symbol;Acc:HGNC:8947]
ENSG00000148346	LCN2	-3.41	6.23e-12	3.14e-09	9	128149071	128153455	lipocalin 2 [Source:HGNC Symbol;Acc:HGNC:6526]
ENSG00000234210	AC006372.4	-3.39	0.00132	0.0426	7	157466231	157499716
ENSG00000126262	FFAR2	-3.38	3.57e-09	1.02e-06	19	35443907	35451767	free fatty acid receptor 2 [Source:HGNC Symbol;Acc:HGNC:4501]
ENSG00000111110	PPM1H	-3.38	0.000379	0.0171	12	62643982	62935037	protein phosphatase, Mg2+/Mn2+ dependent 1H [Source:HGNC Symbol;Acc:HGNC:18583]
ENSG00000198483	ANKRD35	-3.33	5.94e-05	0.00417	1	145866560	145885866	ankyrin repeat domain 35 [Source:HGNC Symbol;Acc:HGNC:26323]
ENSG00000171243	SOSTDC1	-3.32	0.000869	0.0322	7	16461481	16530580	sclerostin domain containing 1 [Source:HGNC Symbol;Acc:HGNC:21748]
ENSG00000185640	KRT79	-3.25	8.46e-14	5.99e-11	12	52821410	52834295	keratin 79 [Source:HGNC Symbol;Acc:HGNC:28930]
ENSG00000204021	LIPK	-3.25	6.77e-12	3.32e-09	10	88724544	88752786	lipase family member K [Source:HGNC Symbol;Acc:HGNC:23444]
ENSG00000204542	C6orf15	-3.25	0.000255	0.0128	6	31111223	31112559	chromosome 6 open reading frame 15 [Source:HGNC Symbol;Acc:HGNC:13927]
ENSG00000185966	LCE3E	-3.23	5.98e-12	3.09e-09	1	152565654	152566772	late cornified envelope 3E [Source:HGNC Symbol;Acc:HGNC:29463]
ENSG00000128383	APOBEC3A	-3.2	1.4e-12	7.86e-10	22	38952741	38992778	apolipoprotein B mRNA editing enzyme catalytic subunit 3A [Source:HGNC Symbol;Acc:HGNC:17343]
ENSG00000188505	NCCRP1	-3.16	3.28e-12	1.74e-09	19	39196961	39201884	non-specific cytotoxic cell receptor protein 1 homolog (zebrafish) [Source:HGNC Symbol;Acc:HGNC:33739]
ENSG00000151962	RBM46	-3.15	8.87e-06	0.000894	4	154781213	154828813	RNA binding motif protein 46 [Source:HGNC Symbol;Acc:HGNC:28401]
ENSG00000170323	FABP4	-3.14	7.23e-17	8.13e-14	8	81478419	81483263	fatty acid binding protein 4 [Source:HGNC Symbol;Acc:HGNC:3559]
ENSG00000169509	CRCT1	-3.13	2.21e-10	8.47e-08	1	152514502	152516010	cysteine rich C-terminal 1 [Source:HGNC Symbol;Acc:HGNC:29875]
ENSG00000196542	SPTSSB	-3.09	4.16e-05	0.00321	3	161344792	161372880	serine palmitoyltransferase small subunit B [Source:HGNC Symbol;Acc:HGNC:24045]
ENSG00000134827	TCN1	-3.07	2.55e-08	5.96e-06	11	59852800	59866575	transcobalamin 1 [Source:HGNC Symbol;Acc:HGNC:11652]
ENSG00000117114	ADGRL2	-3.06	4.15e-21	9.93e-18	1	81306160	81992436	adhesion G protein-coupled receptor L2 [Source:HGNC Symbol;Acc:HGNC:18582]
ENSG00000184148	SPRR4	-3.06	3.8e-11	1.69e-08	1	152970666	152972574	small proline rich protein 4 [Source:HGNC Symbol;Acc:HGNC:23173]
ENSG00000204020	LIPN	-3.06	2.08e-09	6.41e-07	10	88761406	88778242	lipase family member N [Source:HGNC Symbol;Acc:HGNC:23452]
ENSG00000100170	SLC5A1	-3.05	1.81e-09	5.67e-07	22	32043032	32113029	solute carrier family 5 member 1 [Source:HGNC Symbol;Acc:HGNC:11036]
ENSG00000178033	FAM26E	-3.05	0.000347	0.0159	6	116511646	116524792	family with sequence similarity 26 member E [Source:HGNC Symbol;Acc:HGNC:21568]
ENSG00000121207	LRAT	-3.03	2.06e-07	3.48e-05	4	154626945	154753118	lecithin retinol acyltransferase (phosphatidylcholine--retinol O-acyltransferase) [Source:HGNC Symbol;Acc:HGNC:6685]
ENSG00000121966	CXCR4	-3.02	0.00129	0.0419	2	136114349	136118165	C-X-C motif chemokine receptor 4 [Source:HGNC Symbol;Acc:HGNC:2561]
ENSG00000189001	SBSN	-2.95	1.08e-21	4.12e-18	19	35523367	35528351	suprabasin [Source:HGNC Symbol;Acc:HGNC:24950]
ENSG00000134460	IL2RA	-2.95	7.58e-05	0.00497	10	6010689	6062325	interleukin 2 receptor subunit alpha [Source:HGNC Symbol;Acc:HGNC:6008]
ENSG00000162711	NLRP3	-2.92	0.000911	0.0332	1	247416156	247449108	NLR family pyrin domain containing 3 [Source:HGNC Symbol;Acc:HGNC:16400]
ENSG00000236533	AC009413.2	-2.91	8.79e-05	0.00566	2	41850203	41850601
ENSG00000112299	VNN1	-2.9	5.3e-06	0.000579	6	132681590	132714049	vanin 1 [Source:HGNC Symbol;Acc:HGNC:12705]
ENSG00000162692	VCAM1	-2.9	0.000285	0.0139	1	100719742	100739045	vascular cell adhesion molecule 1 [Source:HGNC Symbol;Acc:HGNC:12663]
ENSG00000007908	SELE	-2.9	0.000426	0.0188	1	169722641	169764705	selectin E [Source:HGNC Symbol;Acc:HGNC:10718]
ENSG00000103313	MEFV	-2.9	0.00146	0.0458	16	3242028	3256627	MEFV, pyrin innate immunity regulator [Source:HGNC Symbol;Acc:HGNC:6998]
ENSG00000183760	ACP7	-2.87	1.34e-05	0.00127	19	39083913	39111493	acid phosphatase 7, tartrate resistant (putative) [Source:HGNC Symbol;Acc:HGNC:33781]
ENSG00000161249	DMKN	-2.84	1.22e-12	7.07e-10	19	35497220	35513658	dermokine [Source:HGNC Symbol;Acc:HGNC:25063]
ENSG00000141506	PIK3R5	-2.83	4.75e-06	0.000525	17	8878911	8965712	phosphoinositide-3-kinase regulatory subunit 5 [Source:HGNC Symbol;Acc:HGNC:30035]
ENSG00000244094	SPRR2F	-2.82	0.00154	0.0473	1	153112114	153113515	small proline rich protein 2F [Source:HGNC Symbol;Acc:HGNC:11266]
ENSG00000258689	LINC01269	-2.81	1.15e-05	0.00111	14	70698698	70712153	long intergenic non-protein coding RNA 1269 [Source:HGNC Symbol;Acc:HGNC:50325]
ENSG00000164400	CSF2	-2.78	1.54e-12	8.4e-10	5	132073790	132076170	colony stimulating factor 2 [Source:HGNC Symbol;Acc:HGNC:2434]
ENSG00000241656	UBA52P7	-2.78	0.000369	0.0168	12	115592604	115592983	ubiquitin A-52 residue ribosomal protein fusion product 1 pseudogene 7 [Source:HGNC Symbol;Acc:HGNC:36615]
ENSG00000158786	PLA2G2F	-2.77	1.73e-08	4.19e-06	1	20139326	20150386	phospholipase A2 group IIF [Source:HGNC Symbol;Acc:HGNC:30040]
ENSG00000188460	ACTBP11	-2.77	0.000657	0.0263	1	223863726	223864851	actin, beta pseudogene 11 [Source:HGNC Symbol;Acc:HGNC:33971]
ENSG00000105427	CNFN	-2.76	1.1e-19	1.75e-16	19	42387019	42390287	cornifelin [Source:HGNC Symbol;Acc:HGNC:30183]
ENSG00000167914	GSDMA	-2.76	2.57e-05	0.00212	17	39953263	39977766	gasdermin A [Source:HGNC Symbol;Acc:HGNC:13311]
ENSG00000163202	LCE3D	-2.72	3.05e-13	1.95e-10	1	152579381	152580504	late cornified envelope 3D [Source:HGNC Symbol;Acc:HGNC:16615]
ENSG00000166634	SERPINB12	-2.72	6.13e-06	0.000656	18	63556160	63567011	serpin family B member 12 [Source:HGNC Symbol;Acc:HGNC:14220]
ENSG00000140519	RHCG	-2.71	2.77e-21	7.58e-18	15	89471398	89496613	Rh family C glycoprotein [Source:HGNC Symbol;Acc:HGNC:18140]
ENSG00000163221	S100A12	-2.71	3.85e-14	3.07e-11	1	153373706	153375649	S100 calcium binding protein A12 [Source:HGNC Symbol;Acc:HGNC:10489]
ENSG00000007237	GAS7	-2.68	0.000134	0.00793	17	9910609	10198551	growth arrest specific 7 [Source:HGNC Symbol;Acc:HGNC:4169]
ENSG00000186474	KLK12	-2.67	1.68e-21	5.35e-18	19	51029092	51035230	kallikrein related peptidase 12 [Source:HGNC Symbol;Acc:HGNC:6360]
ENSG00000039139	DNAH5	-2.67	9.1e-08	1.79e-05	5	13690331	13944543	dynein axonemal heavy chain 5 [Source:HGNC Symbol;Acc:HGNC:2950]
ENSG00000187479	C11orf96	-2.67	9.04e-07	0.000123	11	43925342	43944338	chromosome 11 open reading frame 96 [Source:HGNC Symbol;Acc:HGNC:38675]
ENSG00000118520	ARG1	-2.67	0.000173	0.00958	6	131573144	131584332	arginase 1 [Source:HGNC Symbol;Acc:HGNC:663]
ENSG00000169035	KLK7	-2.66	5.47e-11	2.27e-08	19	50976482	50984099	kallikrein related peptidase 7 [Source:HGNC Symbol;Acc:HGNC:6368]
ENSG00000171766	GATM	-2.66	0.000274	0.0136	15	45361124	45402327	glycine amidinotransferase [Source:HGNC Symbol;Acc:HGNC:4175]
ENSG00000240602	AADACP1	-2.65	0.00139	0.044	3	151770428	151784894	arylacetamide deacetylase pseudogene 1 [Source:HGNC Symbol;Acc:HGNC:50305]
ENSG00000235071	RP11-759L5.2	-2.64	0.000368	0.0168	X	16474342	16475340
ENSG00000213026	CFL1P4	-2.64	0.00118	0.0393	1	241993185	241993682	cofilin 1 pseudogene 4 [Source:HGNC Symbol;Acc:HGNC:1880]
ENSG00000065320	NTN1	-2.63	7.14e-10	2.58e-07	17	9021542	9244000	netrin 1 [Source:HGNC Symbol;Acc:HGNC:8029]
ENSG00000213750	KB-1683C8.1	-2.63	2.39e-05	0.00202	8	97624203	97625079
ENSG00000132746	ALDH3B2	-2.62	1.97e-11	9.21e-09	11	67662162	67681200	aldehyde dehydrogenase 3 family member B2 [Source:HGNC Symbol;Acc:HGNC:411]
ENSG00000140379	BCL2A1	-2.62	0.000638	0.0256	15	79960889	79971446	BCL2 related protein A1 [Source:HGNC Symbol;Acc:HGNC:991]
ENSG00000226779	NAALADL2-AS2	-2.61	1.71e-09	5.53e-07	3	175234861	175271096	NAALADL2 antisense RNA 2 [Source:HGNC Symbol;Acc:HGNC:41015]
ENSG00000272763	RP11-357H14.17	-2.61	2.95e-09	8.82e-07	17	48635923	48647023
ENSG00000204323	SMIM5	-2.6	5.02e-07	7.38e-05	17	75633434	75641404	small integral membrane protein 5 [Source:HGNC Symbol;Acc:HGNC:40030]
ENSG00000188089	PLA2G4E	-2.59	3.28e-11	1.49e-08	15	41981582	42051190	phospholipase A2 group IVE [Source:HGNC Symbol;Acc:HGNC:24791]
ENSG00000139988	RDH12	-2.59	3.86e-07	6.05e-05	14	67701886	67734452	retinol dehydrogenase 12 (all-trans/9-cis/11-cis) [Source:HGNC Symbol;Acc:HGNC:19977]
ENSG00000103056	SMPD3	-2.58	0.00019	0.0102	16	68358325	68448688	sphingomyelin phosphodiesterase 3 [Source:HGNC Symbol;Acc:HGNC:14240]
ENSG00000224279	RPS29P31	-2.57	6e-07	8.7e-05	22	38574931	38575431	ribosomal protein S29 pseudogene 31 [Source:HGNC Symbol;Acc:HGNC:52364]
ENSG00000168703	WFDC12	-2.56	0.000389	0.0175	20	45123425	45124465	WAP four-disulfide core domain 12 [Source:HGNC Symbol;Acc:HGNC:16115]
ENSG00000175003	SLC22A1	-2.54	1.28e-07	2.42e-05	6	160121789	160158718	solute carrier family 22 member 1 [Source:HGNC Symbol;Acc:HGNC:10963]
ENSG00000283265	RP11-95M15.3	-2.54	5.56e-05	0.00397	6	137693068	137700415
ENSG00000158022	TRIM63	-2.52	5.91e-05	0.00417	1	26051304	26068436	tripartite motif containing 63 [Source:HGNC Symbol;Acc:HGNC:16007]
ENSG00000243388	RPL3P3	-2.49	0.00018	0.00988	14	56978409	56979621	ribosomal protein L3 pseudogene 3 [Source:HGNC Symbol;Acc:HGNC:23550]
ENSG00000229035	SPRR2C	-2.48	6.6e-07	9.5e-05	1	153140491	153140709	small proline rich protein 2C (pseudogene) [Source:HGNC Symbol;Acc:HGNC:11263]
ENSG00000178372	CALML5	-2.46	6.58e-09	1.7e-06	10	5498697	5499555	calmodulin like 5 [Source:HGNC Symbol;Acc:HGNC:18180]
ENSG00000244649	LINC02086	-2.46	0.000337	0.0157	17	48646923	48707346	long intergenic non-protein coding RNA 2086 [Source:HGNC Symbol;Acc:HGNC:52936]
ENSG00000162572	SCNN1D	-2.45	1.12e-10	4.36e-08	1	1280436	1292029	sodium channel epithelial 1 delta subunit [Source:HGNC Symbol;Acc:HGNC:10601]
ENSG00000250746	RP11-39C10.1	-2.44	1.81e-07	3.16e-05	4	164188311	164190367
ENSG00000142623	PADI1	-2.43	1.9e-13	1.3e-10	1	17205126	17246005	peptidyl arginine deiminase 1 [Source:HGNC Symbol;Acc:HGNC:18367]
ENSG00000168702	LRP1B	-2.42	7.7e-06	0.000787	2	140231423	142131701	LDL receptor related protein 1B [Source:HGNC Symbol;Acc:HGNC:6693]
[truncated: 308 more rows]
